# Supplementary material for: Remote methylene C(sp3)–H functionalization enabled by organophosphine-catalyzed alkyne isomerization
Source: Royal Society of Chemistry journal article supplement (doi:10.1039/d0qo01399d), 2020-12-10

## **Supporting Information**

### **Remote Methylene C(sp<sup>3</sup>)-H Functionalization Enabled by An Organophosphine Catalyzed Alkyne Isomerization**

De Wang, Zefeng Song, Jianyu Zhang, Tao Xu\*

#### **Table of Contents**

|                                                            |             |
|------------------------------------------------------------|-------------|
| <b>1. General information</b>                              | <b>S2</b>   |
| <b>2. The condition optimizations (Table S1-S3)</b>        | <b>S3</b>   |
| <b>3. Experimental procedure and characterization data</b> | <b>S5</b>   |
| <b>4. Asymmetric version</b>                               | <b>S49</b>  |
| <b>5. References</b>                                       | <b>S50</b>  |
| <b>6. X-ray data of compound 2n and 5d</b>                 | <b>S51</b>  |
| <b>7. NMR Spectra</b>                                      | <b>S53</b>  |
| <b>8. Deuterium-labeling experiments</b>                   | <b>S130</b> |

---

## **1. General Informations**

$^1\text{H}$  and  $^{13}\text{C}\{^1\text{H}\}$  NMR spectra were recorded at 400 and 100 MHz by JEOL, respectively. High-resolution mass spectra were recorded by ESI method. The used organic solvents were dried by standard methods if it was necessary. Optical rotations were determined at 589 nm (sodium D line) by using a Perkin-Elmer-341 MC digital polarimeter;  $[\alpha]_{\text{D}}$ -values are given in unit of  $10 \text{ deg}^{-1} \text{ cm}^2 \text{ g}^{-1}$ . Chiral HPLC was performed on an Agilent 1290 Infinity II LC System with chiral columns [Chiralpak IA-H columns 4.6\*250 mm, (Daicel Chemical Ind., Ltd.)]. Commercially obtained reagents were used without further purification. All these reactions were monitored by TLC with silica-gel-coated plates. Flash column chromatography was carried out by using silica gel or aluminium oxide at increased pressure. IR were tested on Thermo Nicolet Avatar 330 FT-IR (sample preparation: all samples dissolved in DCM and applied evenly to the detector, after evaporation of solvent to form a film-like membrane)

## 2. The condition optimizations

**Table S1** Full conditions optimization Part I

Reaction scheme: 3a (0.1 mmol) + 1a (0.1 mmol)  $\xrightarrow[\text{toluene, } T\text{ }^{\circ}\text{C}]{\text{cat. (20 mol\%), add. (20 mol\%)}}$  2a

| entry           | cat.                           | add.                                                                 | T (°C) | yield ( <b>2a</b> ) | ratio (Z/E) <sup>a</sup> |
|-----------------|--------------------------------|----------------------------------------------------------------------|--------|---------------------|--------------------------|
| 1               | P <sup>n</sup> Bu <sub>3</sub> | <i>o</i> -NO <sub>2</sub> BzOH                                       | 80     | 5                   | -                        |
| 2               | P <sup>n</sup> Bu <sub>3</sub> | <i>o</i> -NO <sub>2</sub> BzOH                                       | 100    | 12                  | -                        |
| 3               | P <sup>n</sup> Bu <sub>3</sub> | <i>o</i> -NO <sub>2</sub> BzOH                                       | 25     | NR                  | -                        |
| 4               | PPh <sub>3</sub>               | <i>o</i> -NO <sub>2</sub> BzOH                                       | 100    | NR                  | -                        |
| 5               | P <sup>n</sup> Bu <sub>3</sub> | PhOH                                                                 | 100    | 34                  | -                        |
| 6               | P <sup>n</sup> Bu <sub>3</sub> | -                                                                    | 100    | 10                  | -                        |
| 7               | P <sup>n</sup> Bu <sub>3</sub> | PPh <sub>3</sub> AuCl                                                | 100    | 18                  | -                        |
| 8               | P <sup>n</sup> Bu <sub>3</sub> | IPrAuNTf <sub>2</sub>                                                | 100    | 6                   | -                        |
| 9               | P <sup>n</sup> Bu <sub>3</sub> | AgNTf <sub>2</sub>                                                   | 100    | trace               | -                        |
| 10              | PMe <sub>3</sub>               | PhOH                                                                 | 100    | trace               | -                        |
| 11              | PMe <sub>2</sub> Ph            | PhOH                                                                 | 100    | 52                  | >20:1                    |
| 12              | PMePh <sub>2</sub>             | PhOH                                                                 | 100    | 22                  | -                        |
| 13              | PMe <sub>2</sub> Ph            | <i>p</i> -BrC <sub>6</sub> H <sub>4</sub> OH                         | 100    | 24                  | >20:1                    |
| 14              | PMe <sub>2</sub> Ph            | 2,4-(NO <sub>2</sub> ) <sub>2</sub> C <sub>6</sub> H <sub>3</sub> OH | 100    | trace               | -                        |
| 15              | PMe <sub>2</sub> Ph            | naphthol                                                             | 100    | 36                  | -                        |
| 16              | PMe <sub>2</sub> Ph            | HFIP                                                                 | 100    | 8                   | -                        |
| 17              | PMe <sub>2</sub> Ph            | 4-FC <sub>6</sub> H <sub>4</sub> OH                                  | 100    | 44                  | -                        |
| 18              | PMe <sub>2</sub> Ph            | 4-MeC <sub>6</sub> H <sub>4</sub> OH                                 | 100    | 18                  | -                        |
| 19              | -                              | PPh <sub>3</sub> AuCl/AgBF <sub>4</sub>                              | 100    | NR                  | -                        |
| 20              | PMe <sub>2</sub> Ph            | PPh <sub>3</sub> AuCl/AgBF <sub>4</sub>                              | 100    | 4 (NMR)             | >20:1                    |
| 21              | PMe <sub>2</sub> Ph            | Cs <sub>2</sub> CO <sub>3</sub>                                      | 100    | trace               | -                        |
| 22 <sup>b</sup> | PMe <sub>2</sub> Ph            | PhOH                                                                 | 100    | 49                  | >20:1                    |
| 23              | PMe <sub>2</sub> Ph            | PhOH                                                                 | 60     | 13                  | >20:1                    |
| 24              | PMe <sub>2</sub> Ph            | PhOH                                                                 | 70     | 33                  | >20:1                    |
| 25              | PMe <sub>2</sub> Ph            | ( <i>R</i> )-BINOL                                                   | 100    | 42                  | >20:1                    |
| 26              | PMe <sub>2</sub> Ph            | Ph-P(=O)(OH)-Ph                                                      | 100    | trace               | -                        |

<sup>a</sup> The ratio of compound **2a** was determined by <sup>1</sup>H NMR analysis; <sup>b</sup> Adding 4A MS (50 mg)

**Table S2** Full conditions optimization Part II

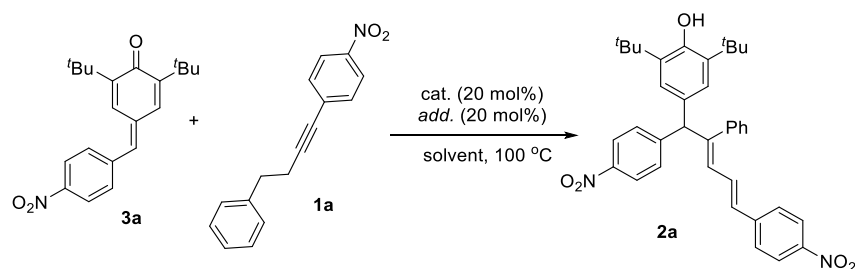

| entry               | cat.                     | add.        | solvent            | yield (2a) | ratio (Z/E)     |
|---------------------|--------------------------|-------------|--------------------|------------|-----------------|
| 1                   | PMe <sub>2</sub> Ph      | PhOH        | fluorobenzene      | 63         | >20:1           |
| 2                   | PMe <sub>2</sub> Ph      | PhOH        | chlorobenzene      | 54         | >20:1           |
| 3                   | PMe <sub>2</sub> Ph      | PhOH        | benzene            | 62         | >20:1           |
| 4                   | PMe <sub>2</sub> Ph      | PhOH        | o-xylene           | 56         | >20:1           |
| 5                   | PMe <sub>2</sub> Ph      | PhOH        | THF                | 19         | >20:1           |
| 6                   | PMe <sub>2</sub> Ph      | PhOH        | 1,4-dioxane        | 13         | >20:1           |
| 7                   | PMe <sub>2</sub> Ph      | PhOH        | DCE                | 30         | >20:1           |
| 8                   | PMe <sub>2</sub> Ph      | PhOH        | CH <sub>3</sub> CN | NR         | >20:1           |
| 9                   | PMe <sub>2</sub> Ph      | PhOH        | PhCF <sub>3</sub>  | 48         | >20:1           |
| 10 <sup>a</sup>     | PMe <sub>2</sub> Ph      | PhOH        | PhF                | 12         | >20:1           |
| 11 <sup>b</sup>     | PMe <sub>2</sub> Ph      | PhOH        | PhF                | 45         | >20:1           |
| 12 <sup>c</sup>     | PMe <sub>2</sub> Ph      | PhOH        | PhF                | 71         | >20:1           |
| 13 <sup>c,d</sup>   | PMe <sub>2</sub> Ph      | PhOH        | PhF                | 85         | >20:1           |
| 14 <sup>d,e</sup>   | <b>PMe<sub>2</sub>Ph</b> | <b>PhOH</b> | <b>PhF</b>         | <b>85</b>  | <b>&gt;20:1</b> |
| 15 <sup>d,e,f</sup> | PMe <sub>2</sub> Ph      | PhOH        | PhF                | 76         | >20:1           |

<sup>a</sup> The reaction run at 120 °C. <sup>b</sup> Mole ratios of **1/2** = 1:2, isolated 18 mg diene from **2**; <sup>c</sup> Mole ratios of **1/2** = 2:1, clean system; <sup>d</sup> Diluted in 4 mL fluorobenzene, 0.025 M concentration. <sup>e</sup> Mole ratios of **1/2** = 1.5:1; <sup>f</sup> Catalyst loading 10 mol%.

**Table S3 Intramolecular isomerization optimizations**

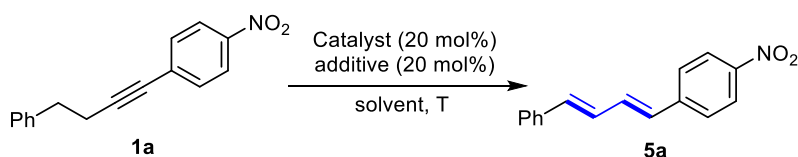

| entry <sup>a</sup> | catalyst                       | additive            | solvent | T (°C) | yield (%) <sup>b</sup> | Z/E <sup>c</sup> |
|--------------------|--------------------------------|---------------------|---------|--------|------------------------|------------------|
| 1                  | P <sup>n</sup> Bu <sub>3</sub> | -                   | toluene | 80/100 | 8                      | >20:1            |
| 2                  | PPh <sub>3</sub>               | -                   | toluene | 80/120 | n.r.                   | -                |
| 3                  | PPh <sub>2</sub> Me            | -                   | toluene | 80     | trace                  | -                |
| 4                  | PPhMe <sub>2</sub>             | -                   | toluene | 80     | 15                     | >20:1            |
| 5                  | DABCO                          | -                   | toluene | 80     | n.r.                   | -                |
| 6                  | none                           | -                   | toluene | 80     | n.r.                   | -                |
| 7                  | PPhMe <sub>2</sub>             | PhOH                | toluene | 80     | 96                     | >20:1            |
| 8                  | PPhMe <sub>2</sub>             | PhCO <sub>2</sub> H | toluene | 80     | 72                     | >20:1            |
| 9                  | PPhMe <sub>2</sub>             | PhOH                | THF     | 80     | 64                     | >20:1            |
| 10                 | PPhMe <sub>2</sub>             | PhOH                | DCE     | 80     | 70                     | >20:1            |
| 11                 | PPhMe <sub>2</sub>             | PhOH                | dioxane | 80     | 35                     | >20:1            |
| 12                 | PPhMe <sub>2</sub>             | PhOH                | toluene | 60     | 34                     | >20:1            |
| 13 <sup>d</sup>    | PPhMe <sub>2</sub>             | PhOH                | toluene | 80     | 97                     | >20:1            |
| 14 <sup>e</sup>    | PPhMe <sub>2</sub>             | PhOH                | toluene | 80     | 83                     | >20:1            |

<sup>a</sup> All reaction carried out with **1a** (0.1 mmol), phosphine (20 mol%), additive (20 mol%) in solvent (1.0 mL); <sup>b</sup> Isolated yield; <sup>c</sup> Determined by crude <sup>1</sup>H NMR analysis; <sup>d</sup> Decreased the catalyst and additive loading to 10 mol%; <sup>e</sup> Decreased the catalyst and additive loading to 5 mol%



### 3. Experimental procedure and characterization data

#### General procedure (I) for preparation alkyne 1a-1u

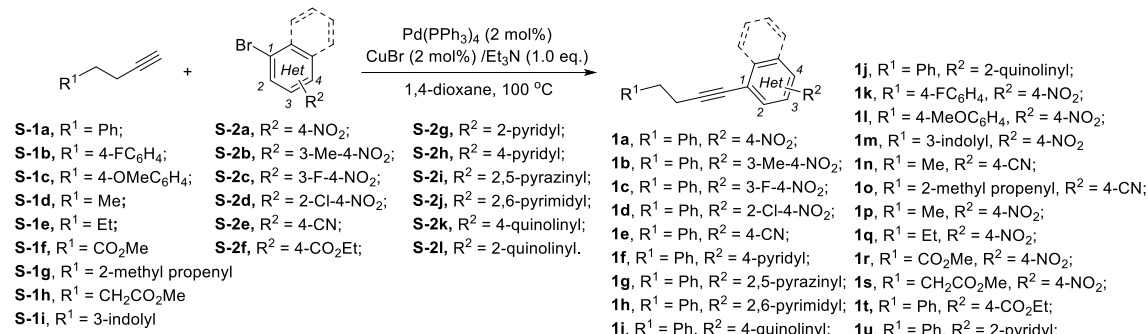

To a dry Schlenk tube was added CuBr (0.04 equiv.) and Pd(PPh<sub>3</sub>)<sub>4</sub> (0.05 equiv.) and dissolved in 1,4-dioxane (10 mL) at room temperature under N<sub>2</sub> protection. After stirring for 10 mins, **S-2** (1.0 equiv.) dissolved in 1,4-dioxane and injected to the above solution followed by addition of TEA (1.0 equiv.). Then alkyne **S-1** (1.0 equiv.) was added to the solution and heated at 100 °C for 10 hours. Cool to room temperature and filter through the celite to collect the solution. The crude product was purified by column chromatography to collect a yellowish product **1**.

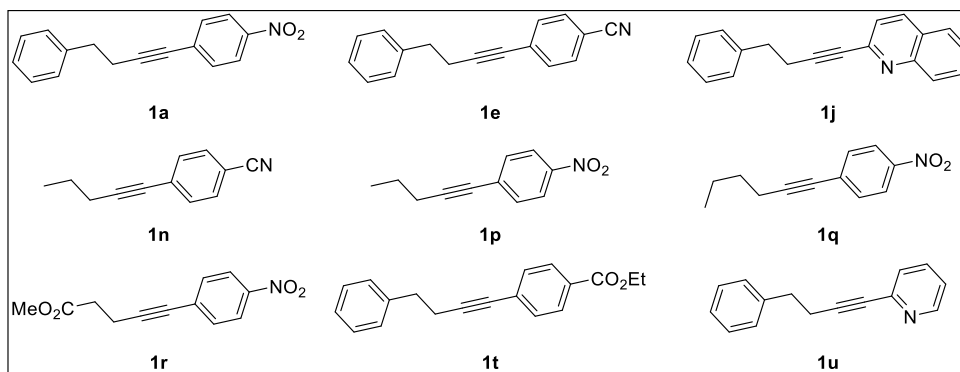

Compounds **1a**, **1e**, **1j**, **1n**, **1p-r**, **1t-u** are known compounds and prepared according to the reported procedures.<sup>1a-g</sup>

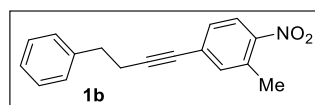

#### 2-methyl-1-nitro-4-(4-phenylbut-1-yn-1-yl)benzene (**1b**)

Compound **1b** (87% yield) was obtained as a yellowish solid following the *general procedure I* from **S-1a** (3.0 mmol, 390 mg, 420 μL) and **S-2b** (3 mmol, 645 mg) stirred

for 12 hours.  $R_f = 0.6$  (PE/EA = 20:1).  $^1\text{H NMR}$  (400 MHz,  $\text{CDCl}_3$ )  $\delta$  7.93 (d,  $J = 8.4$  Hz, 1H), 7.37-7.25 (m, 7H), 2.94 (t,  $J = 7.6$  Hz, 2H), 2.73 (t,  $J = 7.6$  Hz, 2H), 2.58 (s, 3H);  $^{13}\text{C}\{^1\text{H}\}$  NMR (100 MHz,  $\text{CDCl}_3$ )  $\delta$  147.7, 140.2, 135.6, 133.9, 129.7, 129.2, 128.5, 128.4, 126.4, 124.8, 94.4, 79.9, 34.7, 21.7, 20.5; IR (neat)  $\nu$  2931, 2858, 2229, 1602, 1579, 1513, 1340, 1076, 887, 833, 754, 698  $\text{cm}^{-1}$ ; MP: 56-58  $^\circ\text{C}$ ; HRMS calcd. for  $\text{C}_{17}\text{H}_{16}\text{NO}_2$   $[\text{M}+\text{H}]^+$ : 266.1181. Found: 266.1176.

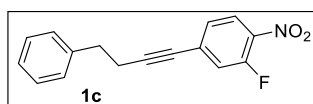

### 2-fluoro-1-nitro-4-(4-phenylbut-1-yn-1-yl)benzene (1c)

Compound **1c** (86% yield) was obtained as a yellowish solid following the *general procedure I* from **S-1a** (3.0 mmol, 390 mg, 420  $\mu\text{L}$ ) and **S-2c** (0.3 mmol, 655 mg) stirred for 12 hours.  $R_f = 0.4$  (PE/EA = 20:1).  $^1\text{H NMR}$  (400 MHz,  $\text{CDCl}_3$ )  $\delta$  7.99 (t,  $J = 8.4$  Hz, 1H), 7.37-7.20 (m, 7H), 2.94 (t,  $J = 7.2$  Hz, 2H), 2.75 (t,  $J = 7.2$  Hz, 2H);  $^{13}\text{C}\{^1\text{H}\}$  NMR (100 MHz,  $\text{CDCl}_3$ )  $\delta$  155.3 (d,  $J = 264.0$  Hz), 140.0, 136.2 (d,  $J = 7.0$  Hz), 132.0 (d,  $J = 10.0$  Hz), 128.4 (d,  $J = 3.8$  Hz), 127.5 (d,  $J = 3.8$  Hz), 126.5, 126.1 (d,  $J = 2.0$  Hz), 121.0 (d,  $J = 22.0$  Hz), 96.7, 79.0 (d,  $J = 2.3$  Hz), 34.5, 21.7;  $^{19}\text{F NMR}$  (376 MHz,  $\text{CDCl}_3$ )  $\delta$  -117.25 to -117.29 (m); IR (neat)  $\nu$  2929, 2855, 2228, 1604, 1590, 1519, 1341, 1093, 836, 748, 694  $\text{cm}^{-1}$ ; MP: 65-67  $^\circ\text{C}$ ; HRMS calcd. for  $\text{C}_{16}\text{H}_{11}\text{FNO}_2$   $[\text{M}-\text{H}]^-$ : 268.0774. Found: 268.0779.

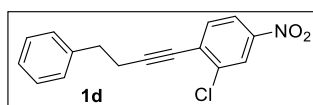

### 2-chloro-4-nitro-1-(4-phenylbut-1-yn-1-yl)benzene (1d)

Compound **1d** (42% yield) was obtained as a yellow solid following the *general procedure I* from **S-1a** (3.0 mmol, 390 mg, 420  $\mu\text{L}$ ) and **S-2d** (3.0 mmol, 702 mg) stirred for 12 hours.  $R_f = 0.3$  (PE/EA = 20:1).  $^1\text{H NMR}$  (400 MHz,  $\text{CDCl}_3$ )  $\delta$  8.26 (d,  $J = 2.4$  Hz, 1H), 8.04 (dd,  $J_1 = 8.8$  Hz,  $J_2 = 2.4$  Hz, 1H), 7.52 (d,  $J = 8.8$  Hz, 1H), 7.36-7.24 (m, 5H), 2.98 (t,  $J = 7.2$  Hz, 2H), 2.83 (t,  $J = 7.2$  Hz, 2H);  $^{13}\text{C}\{^1\text{H}\}$  NMR (100 MHz,  $\text{CDCl}_3$ )  $\delta$  146.7, 140.0, 136.7, 133.6, 130.4, 128.51, 128.47, 126.5, 124.3, 121.4,

101.4, 77.4, 34.5, 22.0; **IR** (neat)  $\nu$  2929, 2861, 2229, 1585, 1519, 1346, 1133, 1118, 887, 835, 742, 700  $\text{cm}^{-1}$ ; **MP**: 58-60  $^{\circ}\text{C}$ ; **HRMS** calcd. for  $\text{C}_{16}\text{H}_{11}\text{NO}_2\text{Cl}$   $[\text{M}-\text{H}]^{-}$  : 284.0478. Found: 284.0484.

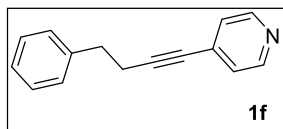

#### 4-(4-phenylbut-1-yn-1-yl)pyridine (**1f**)

Compound **1f** (56% yield) was obtained as a brown oil following the *general procedure I* from **S-1a** (3.0 mmol, 390 mg, 420  $\mu\text{L}$ ) and **S-2h** (3.0 mmol, 470 mg) stirred for 12 hours.  $R_f = 0.1$  (PE/EA = 20:1).  **$^1\text{H}$  NMR** (400 MHz,  $\text{CDCl}_3$ )  $\delta$  8.52 (d,  $J = 6.0$  Hz, 2H), 7.35-7.20 (m, 7H), 2.93 (t,  $J = 7.6$  Hz, 2H), 2.72 (t,  $J = 7.6$  Hz, 2H);  **$^{13}\text{C}\{^1\text{H}\}$  NMR** (100 MHz,  $\text{CDCl}_3$ )  $\delta$  149.6, 140.2, 132.0, 128.5, 128.4, 126.5, 125.7, 94.9, 79.1, 34.7, 21.7; **IR** (neat)  $\nu$  3025, 2927, 2859, 2227, 1592, 1536, 1488, 1454, 1403, 1340, 1213, 989, 821, 760, 698  $\text{cm}^{-1}$ ; **HRMS** calcd. for  $\text{C}_{15}\text{H}_{14}\text{N}$   $[\text{M}+\text{H}]^{+}$  : 208.1126. Found: 208.1126.

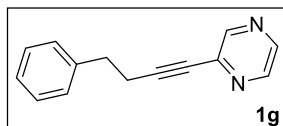

#### 2-(4-phenylbut-1-yn-1-yl)pyrazine (**1g**)

Compound **1g** (47% yield) was obtained as a yellow oil following the *general procedure I* from **S-1a** (3.0 mmol, 390 mg, 420  $\mu\text{L}$ ) and **S-2i** (3.0 mmol, 475 mg) stirred for 12 hours.  $R_f = 0.2$  (PE/EA = 20/1).  **$^1\text{H}$  NMR** (400 MHz,  $\text{CDCl}_3$ )  $\delta$  8.57 (d,  $J = 1.6$  Hz, 1H), 8.49 (dd,  $J = 2.4, 1.6$  Hz, 1H), 8.43 (d,  $J = 2.4$  Hz, 1H), 7.35 – 7.21 (m, 5H), 2.97 (t,  $J = 7.6$  Hz, 2H), 2.77 (t,  $J = 7.6$  Hz, 2H);  **$^{13}\text{C}\{^1\text{H}\}$  NMR** (100 MHz,  $\text{CDCl}_3$ )  $\delta$  147.6, 144.2, 142.4, 140.6, 140.0, 128.5, 128.4, 126.5, 94.5, 78.3, 34.4, 21.6; **IR** (neat)  $\nu$  2958, 2852, 2219, 1558, 1542, 1432, 1251, 878, 754, 698  $\text{cm}^{-1}$ ; **HRMS** calcd. for  $\text{C}_{14}\text{H}_{13}\text{N}_2$   $[\text{M}+\text{H}]^{+}$  : 209.1079. Found: 209.1073.

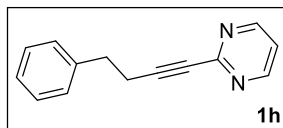

### 2-(4-phenylbut-1-yn-1-yl)pyrimidine (**1h**)

Compound **1h** (42% yield) was obtained as a brown oil following the *general procedure I* from **S-1a** (3.0 mmol, 390 mg, 420  $\mu$ L) and **S-2j** (3.0 mmol, 475 mg) stirred for 12 hours.  $R_f$  = 0.2 (PE/EA = 20:1).  $^1\text{H NMR}$  (400 MHz,  $\text{CDCl}_3$ )  $\delta$  8.68 (d,  $J$  = 4.8 Hz, 2H), 7.34-7.16 (m, 6H), 2.99 (t,  $J$  = 7.6 Hz, 2H), 2.75 (t,  $J$  = 7.6 Hz, 2H);  $^{13}\text{C}\{^1\text{H}\}$  NMR (100 MHz,  $\text{CDCl}_3$ )  $\delta$  157.2, 153.2, 140.2, 128.5, 128.3, 126.4, 119.5, 89.6, 80.3, 34.4, 21.4; **IR** (neat)  $\nu$  3030, 2926, 2234, 1562, 1552, 1413, 1251, 805, 745, 700  $\text{cm}^{-1}$ ; **HRMS** calcd. for  $\text{C}_{14}\text{H}_{13}\text{N}_2$   $[\text{M}+\text{H}]^+$ : 209.1079. Found: 209.1073.

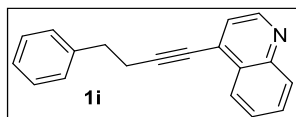

### 4-(4-phenylbut-1-yn-1-yl)quinoline (**1i**)

Compound **1i** (64% yield) was obtained as a brown oil following the *general procedure I* from **S-1a** (3.0 mmol, 390 mg, 420  $\mu$ L) and **S-2k** (3.0 mmol, 618 mg) stirred for 12 hours.  $R_f$  = 0.3 (PE/EA = 20:1).  $^1\text{H NMR}$  (400 MHz,  $\text{CDCl}_3$ )  $\delta$  8.83 (d,  $J$  = 4.4 Hz, 1H), 8.14-8.01 (m, 2H), 7.74-7.68 (m, 1H), 7.56-7.50 (m, 1H), 7.43-7.24 (m, 6H), 3.03 (t,  $J$  = 7.2 Hz, 2H), 2.90 (t,  $J$  = 7.2 Hz, 2H);  $^{13}\text{C}\{^1\text{H}\}$  NMR (100 MHz,  $\text{CDCl}_3$ )  $\delta$  149.7, 148.0, 140.1, 130.4, 129.7, 129.6, 128.54, 128.48, 128.0, 126.8, 126.5, 126.1, 123.5, 99.6, 77.5, 34.7, 21.8; **IR** (neat)  $\nu$  3027, 2927, 2858, 2231, 1577, 1502, 1454, 1390, 846, 763, 698  $\text{cm}^{-1}$ ; **HRMS** calcd. for  $\text{C}_{19}\text{H}_{16}\text{N}$   $[\text{M}+\text{H}]^+$ : 258.1283. Found: 258.1277.

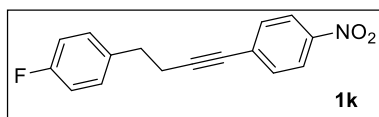

### 1-Fluoro-4-(4-(4-nitrophenyl)but-3-yn-1-yl)benzene (**1k**)

Compound **1k** (61% yield) was obtained as a yellowish solid following the *general procedure I* from **S-1b** (3.0 mmol, 444 mg) and **S-2a** (3.0 mmol, 606 mg) stirred for 12 hours.  $R_f$  = 0.4 (PE/EA = 20/1).  $^1\text{H NMR}$  (400 MHz,  $\text{CDCl}_3$ )  $\delta$  8.15 (d,  $J$  = 9.2 Hz, 2H),

7.47 (d,  $J = 8.8$  Hz, 2H), 7.25-7.19 (m, 2H), 7.05-6.97 (m, 2H), 2.91 (t,  $J = 7.2$  Hz, 2H), 2.72 (t,  $J = 7.2$  Hz, 2H);  $^{13}\text{C}\{^1\text{H}\}$  NMR (100 MHz,  $\text{CDCl}_3$ )  $\delta$  161.6 (d,  $J = 243.2$  Hz), 146.7, 135.8 (d,  $J = 3.1$  Hz), 132.2, 130.7, 129.9 (d,  $J = 7.8$  Hz) 123.5, 115.2 (d,  $J = 21.1$  Hz), 95.2, 80.2, 33.8, 21.8;  $^{19}\text{F}$  NMR (376 MHz,  $\text{CDCl}_3$ )  $\delta$  -116.44 to -116.52 (m); **IR** (neat)  $\nu$  2930, 2857, 2211, 1635, 1590, 1340, 1216, 852, 750, 688  $\text{cm}^{-1}$ ; **MP**: 72-73  $^\circ\text{C}$ ; **HRMS** calcd. for  $\text{C}_{16}\text{H}_{11}\text{FNO}_2$   $[\text{M}-\text{H}]^-$ : 268.0774. Found: 268.0778.

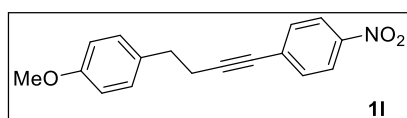

### 1-methoxy-4-(4-(4-nitrophenyl)but-3-yn-1-yl)benzene (**1l**)

Compound **1l** (57% yield) was obtained as a pale yellow solid following the *general procedure I* from **S-1c** (3.0 mmol, 480 mg) and **S-2a** (3.0 mmol, 606 mg) stirred for 12 hours.  $R_f = 0.3$  (PE/EA = 20/1).  $^1\text{H}$  NMR (400 MHz,  $\text{CDCl}_3$ )  $\delta$  8.15 (d,  $J = 8.8$  Hz, 2H), 7.48 (d,  $J = 8.8$  Hz, 2H), 7.18 (d,  $J = 8.8$  Hz, 2H), 6.87 (d,  $J = 8.8$  Hz, 2H), 3.80 (s, 3H), 2.88 (t,  $J = 7.2$  Hz, 2H), 2.71 (t,  $J = 7.2$  Hz, 2H);  $^{13}\text{C}\{^1\text{H}\}$  NMR (100 MHz,  $\text{CDCl}_3$ )  $\delta$  175.2, 158.3, 146.6, 132.2, 130.9, 129.4, 123.5, 113.8, 95.8, 80.0, 53.4, 33.8, 22.0; **IR** (neat)  $\nu$  2937, 2852, 2213, 1590, 1508, 1338, 1245, 1180, 1026, 853, 748  $\text{cm}^{-1}$ ; **MP**: 83-84  $^\circ\text{C}$ ; **HRMS** calcd. for  $\text{C}_{17}\text{H}_{14}\text{NO}_3$   $[\text{M}-\text{H}]^-$ : 280.0974. Found: 280.0981.

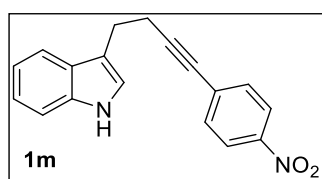

### 3-(4-(4-nitrophenyl)but-3-yn-1-yl)-1H-indole (**1m**)

Compound **1m** (92% yield) was obtained as a yellow solid following the *general procedure I* from **S-1i** (3.0 mmol, 507 mg) and **S-2a** (3.0 mmol, 606 mg) stirred for 12 hours.  $R_f = 0.3$  (PE/EA = 10/1).  $^1\text{H}$  NMR (400 MHz,  $\text{CDCl}_3$ )  $\delta$  8.14 (d,  $J = 8.0$  Hz, 2H), 8.02 (brs, 1H), 7.66 (d,  $J = 8.0$  Hz, 1H), 7.47 (d,  $J = 8.4$  Hz, 2H), 7.39 (d,  $J = 8.0$  Hz, 1H), 7.22 (t,  $J = 8.0$  Hz, 1H), 7.16-7.12 (m, 2H), 3.12 (t,  $J = 7.2$  Hz, 2H), 2.84 (t,  $J = 7.2$  Hz, 2H);  $^{13}\text{C}\{^1\text{H}\}$  NMR (100M Hz,  $\text{CDCl}_3$ )  $\delta$  146.6, 136.2, 132.2, 131.0, 127.2, 123.5, 122.1, 121.6, 119.4, 118.7, 114.9, 111.2, 96.5, 79.8, 24.5, 21.1; **IR** (neat)

$\nu$  3442, 3059, 2892, 2850, 1929, 1590, 1508, 1448, 1336, 1108, 1008, 854, 750  $\text{cm}^{-1}$ ;  
**MP**: 105-107  $^{\circ}\text{C}$ ; **HRMS** calcd. for  $\text{C}_{18}\text{H}_{15}\text{N}_2\text{O}_2$   $[\text{M}+\text{H}]^+$ : 291.1128. Found: 291.1123.

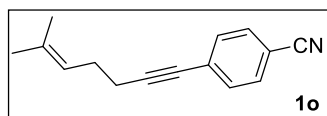

#### 4-(6-methylhept-5-en-1-yn-1-yl)benzonitrile (**1o**)

Compound **1o** (32% yield) was obtained as a pale yellow oil following the *general procedure I* from **S-1g** (1.0 mmol, 108 mg) and **S-2e** (1.0 mmol, 182 mg) stirred for 12 hours.  $R_f$  = 0.6 (PE/EA = 20/1).  $^1\text{H}$  NMR (400 MHz,  $\text{CDCl}_3$ )  $\delta$  7.55 (d,  $J$  = 7.6 Hz, 2H), 7.44 (d,  $J$  = 7.6 Hz, 2H), 5.22-5.18 (m, 1H), 2.43 (t,  $J$  = 7.2 Hz, 2H), 2.29 (q,  $J$  = 7.2 Hz, 2H), 1.72 (s, 3H), 1.65 (s, 3H);  $^{13}\text{C}\{^1\text{H}\}$  NMR (100 MHz,  $\text{CDCl}_3$ )  $\delta$  133.4, 132.0, 131.8, 129.0, 122.3, 118.6, 110.7, 95.4, 79.3, 27.1, 25.6, 19.9, 17.7; **IR** (neat)  $\nu$  3017, 2931, 2859, 2237, 2225, 1602, 1579, 1513, 1340, 1076, 887, 833, 748  $\text{cm}^{-1}$ ; **HRMS** calcd. for  $\text{C}_{15}\text{H}_{16}\text{N}$   $[\text{M}+\text{H}]^+$ : 210.1283. Found: 210.1278.

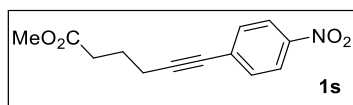

#### methyl 6-(4-nitrophenyl)hex-5-ynoate (**1s**)

Compound **1s** (79% yield) was obtained as a pale yellow solid following the *general procedure I* from **S-1h** (3.0 mmol, 378 mg) and **S-2a** (3.0 mmol, 606 mg) stirred for 12 hours.  $R_f$  = 0.5 (PE/EA = 15/1).  $^1\text{H}$  NMR (400 MHz,  $\text{CDCl}_3$ )  $\delta$  8.15 (d,  $J$  = 8.8 Hz, 2H), 7.51 (d,  $J$  = 8.8 Hz, 2H), 3.69 (s, 3H), 2.55-2.49 (m, 4H), 1.96 (p,  $J$  = 7.2 Hz, 2H);  $^{13}\text{C}\{^1\text{H}\}$  NMR (100 MHz,  $\text{CDCl}_3$ )  $\delta$  173.4, 146.7, 132.3, 130.7, 123.5, 95.0, 80.0, 51.7, 32.8, 23.5, 19.0; **IR** (neat)  $\nu$  2950, 2844, 2229, 1743, 1594, 1521, 1436, 1344, 1220, 1108, 1012, 854, 750, 688  $\text{cm}^{-1}$ ; **HRMS** calcd. for  $\text{C}_{13}\text{H}_{13}\text{NO}_4$   $[\text{M}]^+$ : 247.0845. Found: 247.0846.

## Preparation of compounds 1v

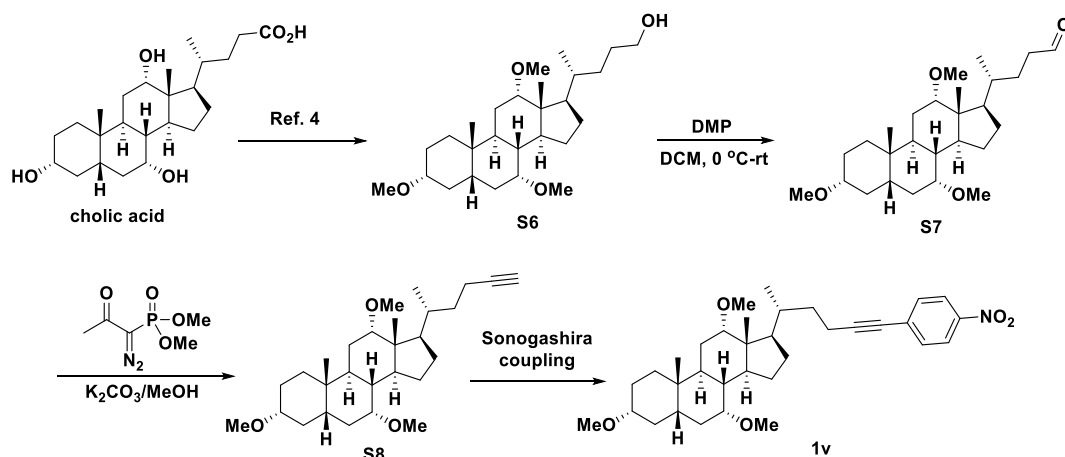

Compound **S6** was prepared according to the reported procedures.<sup>4</sup>

To a solution of DMP (2.7 g, 6.3 mmol, 1.2 equiv) in DCM (20 mL) at 0 °C, cholic alcohol **S6** (2.28 g, 5.23 mmol, 1.0 equiv) dissolved in DCM (20 mL) was added. The reaction mixture was allowed to stir at room temperature overnight, following aqueous NaHCO<sub>3</sub> (15 mL) was added to the reaction mixture. The mixture was extracted with DCM (100 mL) and washed with water. The organic layer was dried over Na<sub>2</sub>SO<sub>4</sub>, filtered and concentrated in vacuum. The residue crude product was purified by flash column chromatography (PE/EA = 6/1~4/1) to afford compound **S7** as a viscous solid (1.2 g, 53% yield).

Compound **S7** (434 mg, 1.0 mmol), K<sub>2</sub>CO<sub>3</sub> (690 mg, 5.0 mmol) were dissolved in MeOH under N<sub>2</sub> protection and cooled to 0 °C. Bestmann reagent (288 mg, 1.5 mmol) was added to the above mixture slowly. After addition, the reaction mixture was allowed warm to room temperature and keep stirring for 3 hours. TLC monitor the reaction, evacuated the MeOH and water was added to dissolve the potassium carbonate, ethyl ester extracted for twice. The organic layer was dried over Na<sub>2</sub>SO<sub>4</sub>, filtered and concentrated in vacuum. The residue crude product was purified by flash column chromatography (PE/EA = 6/1~4/1) to afford compound **S8** as a white solid (213 mg, 49% yield).

Compounds **1v** was followed the general procedure *I*.

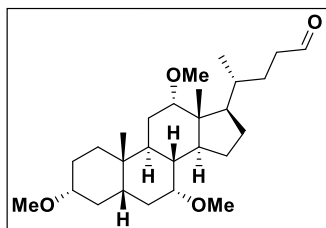

**(R)-4-((3R,5S,7R,8R,9S,10S,12S,13R,14S,17R)-3,7,12-trimethoxy-10,13-dimethylhexadecahydro-1H-cyclopenta[a]phenanthren-17-yl)pentanal (S7)**

Compound **S7** (1.2 g, 53% yield) was obtained as a white solid following the *general procedure as above* from **S-6** (5.23 mmol). **<sup>1</sup>H NMR** (400 MHz, CDCl<sub>3</sub>) δ 9.76 (s, 1H), 3.36 (br, 1H), 3.33 (s, 3H), 3.26 (t, *J* = 2.8 Hz, 3H), 3.21 (s, 3H), 3.14 (q, *J* = 3.2 Hz, 1H), 3.03-2.97 (m, 1H), 2.50-2.32 (m, 1H), 2.23-2.02 (m, 2H), 1.98-1.67 (m, 8H), 1.59-1.46 (m, 2H), 1.42-1.18 (m, 7H), 1.07-0.85 (m, 10H), 0.65 (s, 3H); **<sup>13</sup>C{<sup>1</sup>H} NMR** (100 MHz, CDCl<sub>3</sub>) δ 203.5, 81.9, 80.7, 55.8, 55.7, 55.4, 53.4, 46.2, 46.1, 42.7, 41.9, 40.8, 39.6, 35.2, 35.0, 34.9, 34.4, 27.93, 27.88, 27.7, 27.4, 26.7, 23.1, 22.8, 21.9, 17.4, 12.4; **IR** (neat) ν 2929, 2867, 2818, 1723, 1457, 1369, 1177, 1098 cm<sup>-1</sup>; **MP**: 117-119 °C; **HRMS** Calcd. for C<sub>27</sub>H<sub>45</sub>O<sub>4</sub> [M-H]<sup>-</sup>: 433.3318, found: 433.3323.

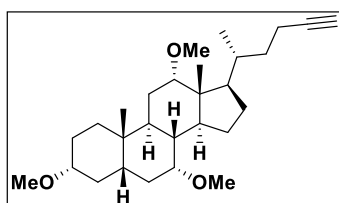

**(3R,5S,7R,8R,9S,10S,12S,13R,14S,17R)-17-((R)-hex-5-yn-2-yl)-3,7,12-trimethoxy-10,13-dimethylhexadecahydro-1H-cyclopenta[a]phenanthrene (S8)**

Compound **S8** (213 mg, 49% yield) was obtained as a white solid following the *general procedure as above* from **S-7** (1.0 mmol). **<sup>1</sup>H NMR** (400 MHz, CDCl<sub>3</sub>) δ 3.37 (t, *J* = 2.8 Hz, 1H), 3.32 (s, 3H), 3.25 (s, 3H), 3.21 (s, 3H), 3.14 (q, *J* = 2.8 Hz, 1H), 3.03-2.95 (m, 1H), 2.28-2.01 (m, 5H), 1.95-1.68 (m, 9H), 1.62-1.43 (m, 4H), 1.35-1.15 (m, 5H), 1.06-0.89 (m, 8H), 0.66 (s, 3H); **<sup>13</sup>C{<sup>1</sup>H} NMR** (100 MHz, CDCl<sub>3</sub>) δ 85.3, 82.0, 80.7, 67.8, 55.8, 55.7, 55.4, 46.4, 46.1, 42.6, 41.9, 39.6, 35.2, 34.9, 34.7, 34.4, 28.0, 27.7, 27.4, 26.7, 23.1, 22.8, 21.9, 17.2, 15.4, 12.4; **IR** (neat) ν 3309, 2933, 2869, 2817, 2115, 1731, 1454, 1371, 1182, 1103, 960, 736, 626 cm<sup>-1</sup>; **MP**: 115-116 °C; **HRMS** Calcd. for



C<sub>28</sub>H<sub>47</sub>O<sub>3</sub> [M+H]<sup>+</sup>: 431.3525, found: 431.3522.

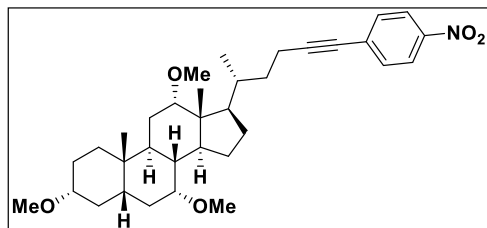

**((3R,5S,7R,8R,9S,10S,12S,13R,14S,17R)-3,7,12-trimethoxy-10,13-dimethyl-17-((R)-6-(4-nitrophenyl)hex-5-yn-2-yl)hexadecahydro-1H-cyclopenta[a]phenanthrene (1v)**

Compound **1v** (152 mg, 79% yield) was obtained as a white solid following the *general procedure I* from **S-8** (0.35 mmol) and **S-2a** (0.35 mmol). <sup>1</sup>H NMR (400 MHz, CDCl<sub>3</sub>) δ 8.14 (d, *J* = 8.8 Hz, 2H), 7.50 (d, *J* = 8.8 Hz, 2H), 3.38 (s, 1H), 3.33 (s, 3H), 3.26 (s, 3H), 3.21 (s, 3H), 3.15 (d, *J* = 2.8 Hz, 1H), 3.03-2.96 (m, 1H), 2.53-2.46 (m, 1H), 2.40-2.31 (m, 1H), 2.29-2.14 (m, 1H), 2.12-1.94 (m, 3H), 1.89-1.70 (m, 6H), 1.63-1.47 (m, 4H), 1.45-1.16 (m, 6H), 1.07-0.90 (m, 8H), 0.67 (s, 3H); <sup>13</sup>C{<sup>1</sup>H} NMR (100 MHz, CDCl<sub>3</sub>) δ 146.5, 132.2, 131.3, 123.5, 97.5, 82.0, 80.7, 79.1, 55.8, 55.7, 55.4, 46.3, 46.1, 42.7, 41.9, 39.6, 35.2, 35.1, 34.9, 34.6, 34.4, 27.9, 27.7, 27.5, 26.7, 23.1, 22.8, 21.9, 17.3, 16.5, 12.4; IR (neat) ν 2929, 2867, 2821, 2228, 1590, 1516, 1454, 1342, 1101, 853, 748 cm<sup>-1</sup>; MP: 62-63 °C; HRMS Calcd. for C<sub>34</sub>H<sub>50</sub>NO<sub>5</sub> [M+H]<sup>+</sup>: 552.3689, found: 552.3688.

**General procedure ( II ) for the synthesis of *p*-QMs (3a-3u)**

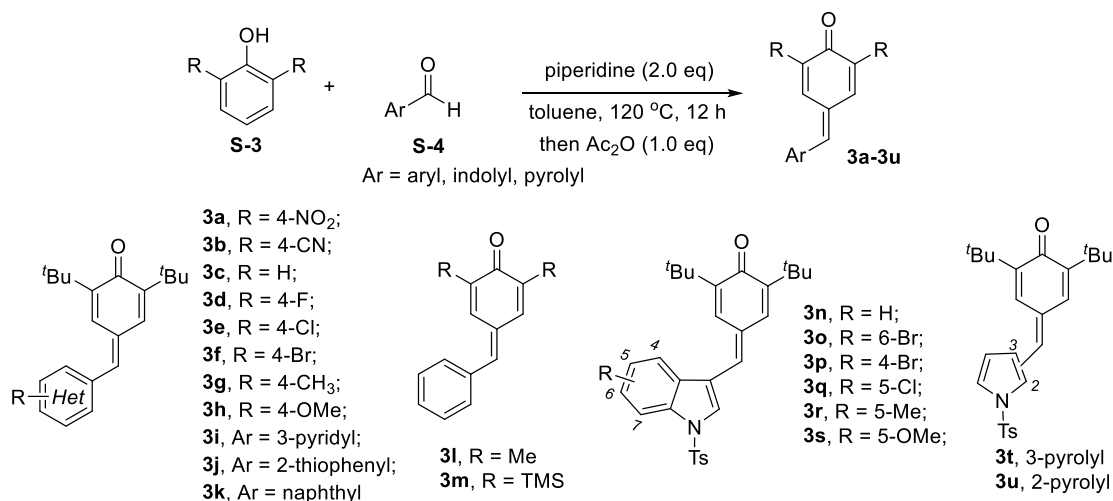

To a solution of 2,6-di-*tert*-butylphenol **S-3** (10 mmol) in toluene (30 mL) was added different aldehyde **S-4** (10 mmol). The reaction mixture was heated in a dry Schlenk tube to reflux. Piperidine (20 mmol) was added drop wise slowly (approx. 0.5 h), and the reaction mixture continued to reflux for 12 h. After the mixture had cooled just below the boiling point of toluene, acetic anhydride (20 mmol) was added, and then the solution was stirred for one hour. The residue was extracted three times with dichloromethane. The combined organic layers were washed with water and brine sequentially, dried over Na<sub>2</sub>SO<sub>4</sub>, filtered, and concentrated. The crude product was purified by flash column chromatography (pure PE to PE/EA = 200:1, *R<sub>f</sub>* = 0.9-0.6) to afford the corresponding product yellow to red solid **3**

Compounds **3a-s** are known products, their preparation followed the reported procedure.<sup>2</sup>

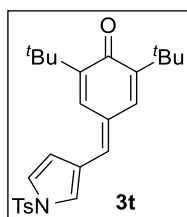

**2,6-Di-*tert*-butyl-4-((1-tosyl-1H-pyrrol-3-yl)methylene)cyclohexa-2,5-dien-1-one (3t)**

Compound **3t** (2.93 g, 67% yield) was obtained as a red solid following the *general procedure II* from **S-3** (10 mmol) and **S-4** (1-tosyl-1H-pyrrole-3-carbaldehyde, 10 mmol). <sup>1</sup>H NMR (400 MHz, CDCl<sub>3</sub>) δ 7.81-7.79 (m, 2H), 7.54 (d, *J* = 2.4 Hz, 1H), 7.39-7.38 (m, 1H), 7.33 (d, *J* = 8.0 Hz, 2H), 7.23 (dd, *J<sub>1</sub>* = 3.2 Hz, *J<sub>2</sub>* = 2.4 Hz, 1H), 6.91 (d, *J* = 2.0 Hz, 1H), 6.84 (s, 1H), 6.56 (dd, *J<sub>1</sub>* = 3.2 Hz, *J<sub>2</sub>* = 2.0 Hz, 1H), 2.43 (s, 3H), 1.31 (s, 9H), 1.30 (s, 9H); <sup>13</sup>C{<sup>1</sup>H} NMR (100 MHz, CDCl<sub>3</sub>) δ 186.2, 148.7, 147.2, 145.8, 135.3, 135.1, 133.9, 130.7, 130.3, 127.1, 127.0, 125.1, 123.1, 122.4, 114.2, 35.4, 34.9, 30.2, 29.5, 29.4, 21.7; IR (neat) ν 2960, 1610, 1567, 1474, 1375, 1358, 1288, 1256, 1240, 1186, 1175, 1104, 1064, 1022, 799, 672 cm<sup>-1</sup>; MP: 93-95 °C; HRMS Calcd. for C<sub>26</sub>H<sub>32</sub>NO<sub>3</sub>S [M+H]<sup>+</sup>: 438.2103, found: 438.2094.

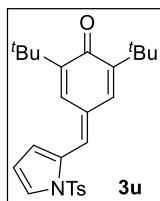

**2,6-Di-tert-butyl-4-((1-tosyl-1H-pyrrol-2-yl)methylene)cyclohexa-2,5-dien-1-one (3u)**

Compound **3u** (2.44 g, 56% yield) was obtained as a red solid following the *general procedure II* from **S-3** (10 mmol) and **S-4** (1-tosyl-1H-pyrrole-2-carbaldehyde, 10 mmol).  $^1\text{H}$  NMR (400 MHz,  $\text{CDCl}_3$ )  $\delta$  7.68-7.65 (m, 2H), 7.50 (dd,  $J_1 = 3.6$  Hz,  $J_2 = 2.0$  Hz, 1H), 7.43 (s, 1H), 7.30-7.26 (m, 3H), 6.99 (d,  $J = 2.4$  Hz, 1H), 6.55 (dt,  $J_1 = 3.6$  Hz,  $J_2 = 1.2$  Hz, 1H), 6.41 (t,  $J = 3.2$  Hz, 1H), 2.39 (s, 3H), 1.33 (s, 9H), 1.25 (s, 9H);  $^{13}\text{C}\{^1\text{H}\}$  NMR (100 MHz,  $\text{CDCl}_3$ )  $\delta$  186.7, 149.2, 147.6, 145.5, 135.4, 134.5, 131.5, 131.0, 130.1, 128.6, 127.2, 126.9, 126.1, 121.0, 113.7, 35.3, 35.0, 29.5, 21.7; IR (neat)  $\nu$  2954, 1607, 1556, 1440, 1358, 1259, 1175, 1146, 1129, 1087, 1016  $\text{cm}^{-1}$ ; MP: 86-88  $^\circ\text{C}$ ; HRMS Calcd. for  $\text{C}_{26}\text{H}_{30}\text{NO}_3\text{S}$   $[\text{M}-\text{H}]^-$ : 436.1946, found: 436.1951.

**General procedure (III) for the synthesis of compound 2 and 4:**

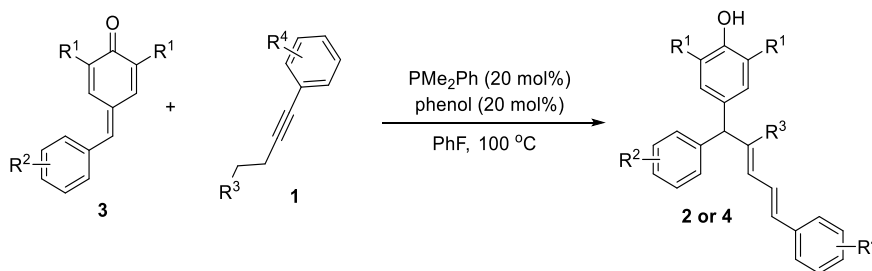

Compounds *p*-quinone methides **3** (1.5 equiv.), alkyne **1** (1.0 equiv.), phenol (0.2 equiv.) and anhydrous fluorobenzene were added to an oven dried vial under  $\text{N}_2$  protection, then  $\text{PMe}_2\text{Ph}$  (0.2 equiv.) was added to the above mixture at room temperature. The resulting mixture was stirred at 100  $^\circ\text{C}$  for 12 hours. The reaction mixture was then concentrated on a rotary evaporator under reduce pressure and the residue was subjected to purification by column chromatography (PE/EA = 20/1) to afford the corresponding product **2** and/or **4**.

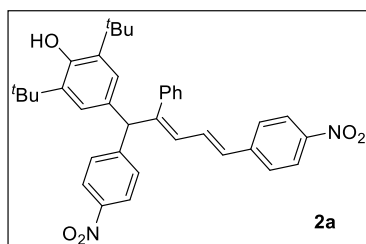

**4-((2Z,4E)-1,5-Bis(4-nitrophenyl)-2-phenylpenta-2,4-dien-1-yl)-2,6-di-tert-butylphenol (2a)**

Compound **2a** (50 mg, 85% yield) was obtained as a yellowish solid following the *general procedure III* from **3a** (0.15 mmol, 51 mg) and **1a** (0.1 mmol, 25 mg) stirred for 12 hours. **<sup>1</sup>H NMR** (400 MHz, CDCl<sub>3</sub>) δ 8.16 (d, *J* = 8.4 Hz, 2H), 8.09 (d, *J* = 8.4 Hz, 2H), 7.40-7.30 (m, 7H), 7.22-7.20 (m, 2H), 6.98-6.91 (m, 3H), 6.52 (d, *J* = 15.6 Hz, 1H), 6.01 (d, *J* = 10.8 Hz, 1H), 5.31 (s, 1H), 5.18 (s, 1H), 1.39 (s, 18H); **<sup>13</sup>C{<sup>1</sup>H} NMR** (100 MHz, CDCl<sub>3</sub>) δ 152.8, 150.5, 148.9, 146.5, 143.8, 140.1, 135.9, 130.9, 130.5, 130.31, 130.27, 129.0, 128.4, 127.8, 126.7, 126.0, 124.0, 123.6, 59.3, 34.4, 30.3; **IR** (neat) ν 3626, 2957, 1649, 1590, 1525, 1434, 1344, 1234, 1152, 1107, 1011, 855, 740, 703 cm<sup>-1</sup>; **MP**: 176-178 °C; **HRMS** Calcd. for C<sub>37</sub>H<sub>37</sub>N<sub>2</sub>O<sub>5</sub> [M-H]<sup>-</sup>: 589.2702, found: 589.2711.

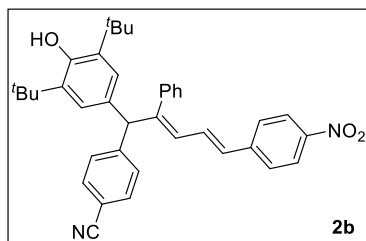

**4-((2Z,4E)-1-(3,5-di-tert-butyl-4-hydroxyphenyl)-5-(4-nitrophenyl)-2-phenylpenta-2,4-dien-1-yl)benzonitrile (2b)**

Compound **2b** (57 mg, >99% yield) was obtained as a yellowish solid following the *general procedure III* from **3b** (0.15 mmol, 48 mg) and **1a** (0.1 mmol, 25 mg) stirred for 12 hours. **<sup>1</sup>H NMR** (400 MHz, CDCl<sub>3</sub>) δ 8.09 (d, *J* = 8.8 Hz, 2H), 7.60 (d, *J* = 8.4 Hz, 2H), 7.35-7.30 (m, 7H), 7.21-7.19 (m, 2H), 6.97-6.91 (m, 3H), 6.51 (d, *J* = 15.6 Hz, 1H), 6.00 (d, *J* = 11.2 Hz, 1H), 5.26 (s, 1H), 5.17 (s, 1H), 1.38 (s, 18H); **<sup>13</sup>C{<sup>1</sup>H} NMR** (100 MHz, CDCl<sub>3</sub>) δ 152.7, 149.1, 148.4, 146.4, 143.8, 140.1, 135.9, 132.1, 130.7, 130.6, 130.4, 130.2, 128.9, 128.3, 127.7, 126.7, 126.0, 124.0, 119.0, 110.2, 59.5, 34.4,

30.2; **IR** (neat)  $\nu$  3632, 2960, 2917, 2855, 2227, 1590, 1514, 1432, 1340, 1234, 1107, 971, 827, 745, 700  $\text{cm}^{-1}$ ; **MP**: 212-213  $^{\circ}\text{C}$ ; **HRMS** Calcd. for  $\text{C}_{38}\text{H}_{37}\text{N}_2\text{O}_3$   $[\text{M}-\text{H}]^-$ : 569.2804, found: 569.2807.

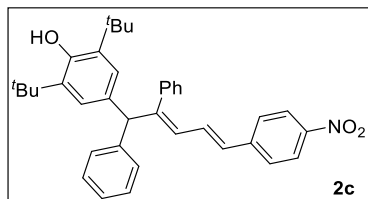

**2,6-Di-tert-butyl-4-((2Z,4E)-5-(4-nitrophenyl)-1,2-diphenylpenta-2,4-dien-1-yl)phenol (2c)**

Compound **2c** (47.3 mg, 87% yield) was obtained as a yellow solid following the *general procedure III* from **3c** (0.15 mmol, 44 mg) and **1a** (0.1 mmol, 25 mg) stirred for 12 hours.  **$^1\text{H}$  NMR** (400 MHz,  $\text{CDCl}_3$ )  $\delta$  8.08 (d,  $J$  = 8.8 Hz, 2H), 7.37-7.28 (m, 7H), 7.24-7.19 (m, 5H), 6.99-6.92 (m, 3H), 6.49 (d,  $J$  = 15.6 Hz, 1H), 6.05 (d,  $J$  = 11.2 Hz, 1H), 5.20 (s, 1H), 5.10 (s, 1H), 1.38 (s, 18H);  **$^{13}\text{C}\{^1\text{H}\}$  NMR** (100 MHz,  $\text{CDCl}_3$ )  $\delta$  152.3, 150.9, 146.3, 144.2, 142.5, 140.9, 135.4, 131.8, 131.2, 129.9, 129.8, 129.5, 129.0, 128.2, 128.1, 127.4, 126.5, 126.4, 126.1, 124.0, 59.6, 34.3, 30.3; **IR** (neat)  $\nu$  3629, 2957, 2920, 2869, 1587, 1513, 1434, 1338, 1231, 1107, 971, 864, 742, 703  $\text{cm}^{-1}$ ; **MP**: 66-68  $^{\circ}\text{C}$ ; **HRMS** Calcd. for  $\text{C}_{37}\text{H}_{38}\text{NO}_3$   $[\text{M}-\text{H}]^-$ : 544.2852, found: 544.2853.

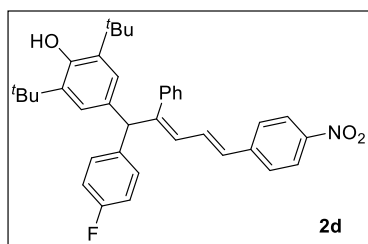

**2,6-Di-tert-butyl-4-((2Z,4E)-1-(4-fluorophenyl)-5-(4-nitrophenyl)-2-phenylpenta-2,4-dien-1-yl)phenol (2d)**

Compound **2d** (45.5 mg, 81% yield) was obtained as a yellowish solid following the *general procedure III* from **3d** (0.15 mmol, 47 mg) and **1a** (0.1 mmol, 25 mg) stirred for 12 hours.  **$^1\text{H}$  NMR** (400 MHz,  $\text{CDCl}_3$ )  $\delta$  8.08 (d,  $J$  = 8.8 Hz, 2H), 7.35-7.28 (m, 5H), 7.20-7.16 (m, 4H), 7.01-6.97 (m, 2H), 6.95-6.91 (m, 3H), 6.49 (d,  $J$  = 15.6 Hz, 1H), 6.02 (d,  $J$  = 11.0 Hz, 1H), 5.18 (s, 1H), 5.12 (s, 1H), 1.38 (s, 18H);  **$^{13}\text{C}\{^1\text{H}\}$  NMR**

(100 MHz, CDCl<sub>3</sub>)  $\delta$  161.4 (d,  $J$  = 243.4 Hz), 152.4, 150.6, 146.3, 144.1, 140.7, 138.2, 135.6, 131.7, 131.0, 130.9 (d,  $J$  = 7.7 Hz), 130.1, 129.8, 129.0, 128.1, 127.5, 126.6, 126.0, 124.0, 115.1 (d,  $J$  = 20.9 Hz), 58.8, 34.3, 30.3; **<sup>19</sup>F NMR** (376 MHz, CDCl<sub>3</sub>)  $\delta$  -116.53 to -116.61 (m); **IR** (neat)  $\nu$  3632, 2960, 2912, 1587, 1505, 1432, 1340, 1228, 1158, 1110, 974, 830, 742, 703 cm<sup>-1</sup>; **MP**: 74-75 °C; **HRMS** Calcd. for C<sub>37</sub>H<sub>37</sub>FNO<sub>3</sub> [M-H]<sup>-</sup>: 562.2757, found: 562.2762.

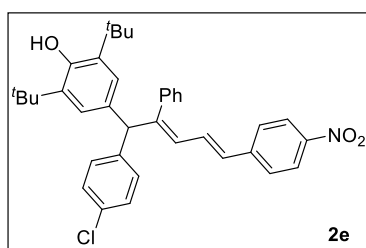

**2,6-Di-tert-butyl-4-((2Z,4E)-1-(4-chlorophenyl)-5-(4-nitrophenyl)-2-phenylpenta-2,4-dien-1-yl)phenol (2e)**

Compound **2e** (45.0 mg, 78% yield) was obtained as a yellowish solid following the *general procedure III* from **3e** (0.15 mmol, 49 mg) and **1a** (0.1 mmol, 25 mg) stirred for 12 hours. **<sup>1</sup>H NMR** (400 MHz, CDCl<sub>3</sub>)  $\delta$  8.09-8.07 (m, 2H), 7.35-7.28 (m, 7H), 7.20-7.14 (m, 4H), 6.97-6.90 (m, 3H), 6.50 (d,  $J$  = 15.6 Hz, 1H), 6.02 (d,  $J$  = 10.8 Hz, 1H), 5.17 (s, 1H), 5.12 (s, 1H), 1.38 (s, 18H); **<sup>13</sup>C{<sup>1</sup>H} NMR** (100 MHz, CDCl<sub>3</sub>)  $\delta$  152.4, 150.2, 146.4, 144.1, 141.2, 140.6, 135.7, 132.1, 131.3, 131.0, 130.8, 130.2, 129.9, 129.0, 128.4, 128.2, 127.5, 126.6, 126.0, 124.0, 58.9, 34.3, 30.3; **IR** (neat)  $\nu$  3626, 2957, 2915, 2867, 1587, 1514, 1432, 1338, 1107, 1014, 971, 827, 748, 700 cm<sup>-1</sup>; **MP**: 184-185 °C; **HRMS** Calcd. for C<sub>37</sub>H<sub>37</sub>NO<sub>3</sub>Cl [M-H]<sup>-</sup>: 578.2462, found: 578.2455.

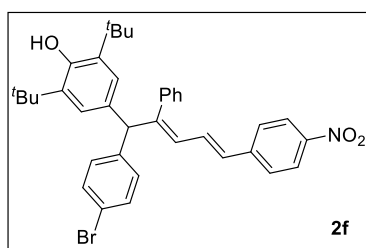

**4-((2Z,4E)-1-(4-bromophenyl)-5-(4-nitrophenyl)-2-phenylpenta-2,4-dien-1-yl)-2,6-di-tert-butylphenol (2f)**

Compound **2f** (52.2 mg, 84% yield) was obtained as a yellowish solid following the *general procedure III* from **3f** (0.15 mmol, 56 mg) and **1a** (0.1 mmol, 25 mg) stirred for 12 hours. **<sup>1</sup>H NMR** (400 MHz, CDCl<sub>3</sub>) δ 8.08 (d, *J* = 9.2 Hz, 2H), 7.43-7.41 (m, 2H), 7.35-7.28 (m, 5H), 7.20-7.17 (m, 2H), 7.09 (d, *J* = 8.0 Hz, 2H), 6.97-6.90 (m, 3H), 6.50 (d, *J* = 15.6 Hz, 1H), 6.02 (d, *J* = 11.2 Hz, 1H), 5.15 (s, 1H), 5.12 (s, 1H), 1.38 (s, 18H); **<sup>13</sup>C{<sup>1</sup>H} NMR** (100 MHz, CDCl<sub>3</sub>) δ 152.4, 150.1, 146.4, 144.1, 141.7, 140.6, 135.7, 131.3, 131.2, 130.9, 130.3, 130.0, 129.0, 128.2, 127.5, 126.6, 126.0, 124.0, 120.2, 59.0, 34.3, 30.3; **IR** (neat) ν 3626, 2960, 2864, 1593, 1516, 1482, 1434, 1338, 1011, 974, 830, 745, 703 cm<sup>-1</sup>; **MP**: 181-183 °C; **HRMS** Calcd. for C<sub>37</sub>H<sub>37</sub>NO<sub>3</sub>Br [M-H]<sup>-</sup>: 622.1957, found: 622.1948.

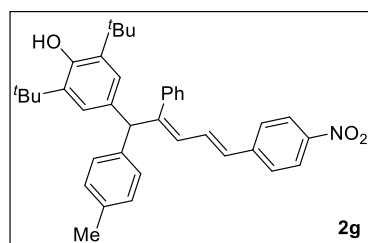

**2,6-Di-tert-butyl-4-((2Z,4E)-5-(4-nitrophenyl)-2-phenyl-1-(p-tolyl)penta-2,4-dien-1-yl)phenol (2g)**

Compound **2g** (34.6 mg, 62% yield) was obtained as a yellowish solid following the *general procedure III* from **3g** (0.15 mmol, 46 mg) and **1a** (0.1 mmol, 25 mg) stirred at 120 °C in PhCF<sub>3</sub> for 12 hours. **<sup>1</sup>H NMR** (400 MHz, CDCl<sub>3</sub>) δ 8.10-8.06 (m, 2H), 7.34-7.27 (m, 5H), 7.20-7.18 (m, 2H), 7.14-7.08 (m, 4H), 6.98-6.91 (m, 3H), 6.48 (d, *J* = 15.6 Hz, 1H), 6.05 (d, *J* = 11.2 Hz, 1H), 5.15 (s, 1H), 5.08 (s, 1H), 2.33 (s, 3H), 1.38 (s, 18H); **<sup>13</sup>C{<sup>1</sup>H} NMR** (100 MHz, CDCl<sub>3</sub>) δ 152.2, 151.2, 146.2, 144.3, 141.0, 139.5, 135.8, 135.4, 132.0, 131.3, 129.8, 129.6, 129.3, 129.0, 129.0, 128.1, 127.3, 126.5, 126.1, 124.0, 59.2, 34.3, 30.3, 21.1; **IR** (neat) ν 3629, 2960, 2917, 1590, 1514, 1432, 1338, 1231, 1107, 971, 824, 745, 703 cm<sup>-1</sup>; **MP**: 72-75 °C; **HRMS** Calcd. for C<sub>38</sub>H<sub>40</sub>NO<sub>3</sub> [M-H]<sup>-</sup>: 558.3014, found: 558.3019.

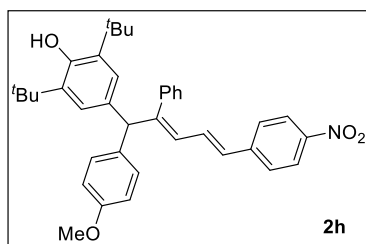

**2,6-Di-tert-butyl-4-((2Z,4E)-1-(4-methoxyphenyl)-5-(4-nitrophenyl)-2-phenylpenta-2,4-dien-1-yl)phenol (2h)**

Compound **2h** (24.7 mg, 43% yield) was obtained as a yellowish solid following the *general procedure III* from **3h** (0.15 mmol, 49 mg) and **1a** (0.1 mmol, 25 mg) stirred at 120 °C in PhCF<sub>3</sub> for 12 hours. **<sup>1</sup>H NMR** (400 MHz, CDCl<sub>3</sub>) δ 8.08 (d, *J* = 8.8 Hz, 2H), 7.33-7.27 (m, 5H), 7.19-7.17 (m, 2H), 7.13-7.10 (m, 2H), 6.97-6.91 (m, 3H), 6.86-6.83 (m, 2H), 6.48 (d, *J* = 15.6 Hz, 1H), 6.04 (d, *J* = 10.8 Hz, 1H), 5.14 (s, 1H), 5.08 (s, 1H), 3.80 (s, 3H), 1.38 (s, 18H); **<sup>13</sup>C{<sup>1</sup>H} NMR** (100 MHz, CDCl<sub>3</sub>) δ 158.0, 152.2, 151.3, 146.3, 144.3, 141.0, 135.4, 134.6, 132.2, 131.3, 130.4, 129.8, 129.5, 129.0, 128.1, 127.3, 126.5, 126.0, 124.0, 113.6, 58.8, 55.2, 34.3, 30.3; **IR**(neat) ν 3632, 2963, 2872, 1587, 1508, 1432, 1340, 1248, 1177, 1104, 1033, 974, 833, 742, 706 cm<sup>-1</sup>; **MP**: 86-87 °C; **HRMS** Calcd. for C<sub>38</sub>H<sub>40</sub>NO<sub>4</sub> [M-H]<sup>-</sup>: 574.2963, found: 574.2967.

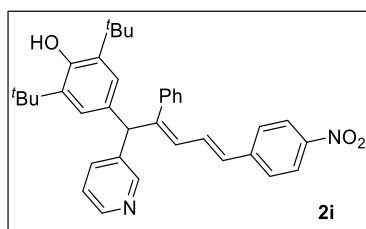

**2,6-Di-tert-butyl-4-((2Z,4E)-5-(4-nitrophenyl)-2-phenyl-1-(pyridin-3-yl)penta-2,4-dien-1-yl)phenol (2i)**

Compound **2i** (45.2 mg, 83% yield) was obtained as a yellowish solid following the *general procedure III* from **3i** (0.15 mmol, 44 mg) and **1a** (0.1 mmol, 25 mg) stirred for 12 hours. **<sup>1</sup>H NMR** (400 MHz, CDCl<sub>3</sub>) δ 8.49-8.46 (m, 2H), 8.08 (d, *J* = 8.8 Hz, 2H), 7.52 (d, *J* = 8.0 Hz, 1H), 7.36-7.29 (m, 5H), 7.25-7.20 (m, 3H), 6.97-6.91 (m, 3H), 6.50 (d, *J* = 15.6 Hz, 1H), 6.03 (d, *J* = 11.2 Hz, 1H), 5.22 (s, 1H), 5.18 (s, 1H), 1.39 (s, 18H); **<sup>13</sup>C{<sup>1</sup>H} NMR** (100 MHz, CDCl<sub>3</sub>) δ 152.6, 150.9, 149.4, 147.7, 146.4, 143.9, 140.2, 138.2, 136.8, 135.8, 130.7, 130.5, 130.2, 129.0, 128.3, 127.6, 126.6, 125.9, 124.0, 123.2,



57.1, 34.3, 30.3; **IR** (neat)  $\nu$  3629, 1956, 1869, 1589, 1513, 1434, 1340, 1234, 1107, 1028, 971, 867, 827, 738, 703  $\text{cm}^{-1}$ ; **MP**: 84-86  $^{\circ}\text{C}$ ; **HRMS** Calcd. for  $\text{C}_{36}\text{H}_{37}\text{N}_2\text{O}_3$   $[\text{M}-\text{H}]^-$ : 545.2810, found: 545.2819.

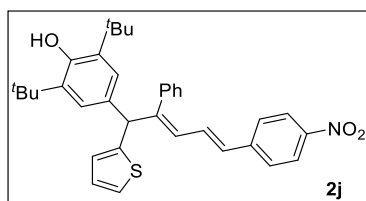

**2,6-Di-tert-butyl-4-((2Z,4E)-5-(4-nitrophenyl)-2-phenyl-1-(thiophen-2-yl)penta-2,4-dien-1-yl)phenol (2j)**

Compound **2j** (38 mg, 69% yield,  $Z/E = 8/1$ ) was obtained as a yellowish solid following the *general procedure III* from **3j** (0.15 mmol, 45 mg) and **1a** (0.1 mmol, 25 mg) stirred for 12 hours.  **$^1\text{H}$  NMR** (400 MHz,  $\text{CDCl}_3$ )  $\delta$  8.10-8.06 (m, 2H), 7.39-7.29 (m, 6H), 7.22 (dd,  $J_1 = 4.2$  Hz,  $J_2 = 1.2$  Hz, 1H), 7.16-7.14 (m, 2H), 7.02 (s, 2H), 6.97-6.95 (m, 1H), 6.80-6.79 (m, 1H), 6.56 (d,  $J = 15.6$  Hz, 1H), 6.28 (d,  $J = 11.2$  Hz, 1H), 5.33 (s, 1H), 5.12 (s, 1H), 1.39 (s, 18H);  **$^{13}\text{C}\{^1\text{H}\}$  NMR** (100 MHz,  $\text{CDCl}_3$ )  $\delta$  152.6, 150.5, 147.0, 146.3, 144.1, 140.1, 135.5, 131.7, 131.0, 130.3, 129.2, 128.9, 128.1, 127.5, 126.7, 126.63, 126.60, 126.4, 125.6, 124.5, 124.0, 54.7, 34.3, 30.3; **IR** (neat)  $\nu$  3632, 2957, 2920, 2872, 1589, 1513, 1432, 1338, 1234, 1152, 1107, 971, 830, 740, 703  $\text{cm}^{-1}$ ; **MP**: 58-60  $^{\circ}\text{C}$ ; **HRMS** Calcd. for  $\text{C}_{35}\text{H}_{36}\text{NO}_3\text{S}$   $[\text{M}-\text{H}]^-$ : 550.2421, found: 550.2431.

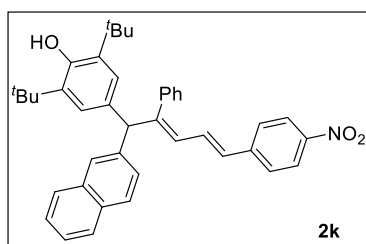

**2,6-Di-tert-butyl-4-((2Z,4E)-1-(naphthalen-2-yl)-5-(4-nitrophenyl)-2-phenylpenta-2,4-dien-1-yl)phenol (2k)**

Compound **2k** (33.9 mg, 57% yield) was obtained as a yellowish solid following the *general procedure III* from **3k** (0.15 mmol, 51.6 mg) and **1a** (0.1 mmol, 25 mg) stirred for 12 hours.  **$^1\text{H}$  NMR** (400 MHz,  $\text{CDCl}_3$ )  $\delta$  8.08 (d,  $J = 8.8$  Hz, 2H), 7.84-7.76 (m,

3H), 7.59 (s, 1H), 7.48-7.42 (m, 3H), 7.34-7.24 (m, 7H), 7.03 (s, 2H), 6.98 (dd,  $J_1 = 15.6$  Hz,  $J_2 = 11.2$  Hz, 1H), 6.47 (d,  $J = 15.6$  Hz, 1H), 6.10 (d,  $J = 11.2$  Hz, 1H), 5.37 (s, 1H), 5.12 (s, 1H), 1.39 (s, 18H);  $^{13}\text{C}\{^1\text{H}\}$  NMR (100 MHz,  $\text{CDCl}_3$ )  $\delta$  152.4, 150.7, 146.3, 144.2, 140.9, 140.3, 135.6, 133.4, 132.2, 131.7, 131.2, 130.1, 129.0, 128.1, 128.0, 127.9, 127.8, 127.6, 127.4, 126.5, 126.2, 125.9, 125.6, 124.0, 59.7, 34.3, 30.3; **IR** (neat)  $\nu$  3632, 2963, 2867, 1587, 1514, 1434, 1338, 1262, 1107, 1025, 974, 742, 703  $\text{cm}^{-1}$ ; **MP**: 84-86  $^\circ\text{C}$ ; **HRMS** Calcd. for  $\text{C}_{41}\text{H}_{40}\text{NO}_3$   $[\text{M}-\text{H}]^-$ : 594.3008, found: 594.3010.

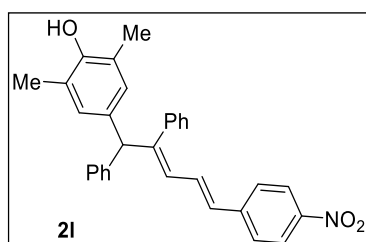

**2,6-Dimethyl-4-((2Z,4E)-5-(4-nitrophenyl)-1,2-diphenylpenta-2,4-dien-1-yl)phenol (2l)**

Compound **2l** (42.4 mg, 92% yield) was obtained as a white solid following the *general procedure III* from **3l** (0.15 mmol, 31.5 mg) and **1a** (0.1 mmol, 25 mg) stirred at room temperature for 12 hours.  $^1\text{H}$  NMR (400 MHz,  $\text{CDCl}_3$ )  $\delta$  8.10-8.06 (m, 2H), 7.36-7.33 (m, 3H), 7.31-7.28 (m, 4H), 7.25-7.24 (m, 2H), 7.22-7.20 (m, 3H), 6.96 (dd,  $J_1 = 15.6$  Hz,  $J_2 = 10.8$  Hz, 1H), 6.81 (s, 2H), 6.49 (d,  $J = 15.6$  Hz, 1H), 6.03 (d,  $J = 10.8$  Hz, 1H), 5.17 (s, 1H), 4.55 (brs, 1H), 2.21 (s, 6H);  $^{13}\text{C}\{^1\text{H}\}$  NMR (100 MHz,  $\text{CDCl}_3$ )  $\delta$  150.8, 150.5, 146.4, 144.2, 142.3, 141.0, 133.1, 131.1, 130.2, 129.9, 129.7, 129.5, 128.9, 128.3, 128.2, 127.5, 126.54, 126.46, 124.0, 122.9, 58.9, 16.0; **IR** (neat)  $\nu$  3643, 2923, 2850, 1587, 1488, 1336, 1197, 971, 745, 700  $\text{cm}^{-1}$ ; **MP**: 78-80  $^\circ\text{C}$ ; **HRMS** Calcd. for  $\text{C}_{31}\text{H}_{26}\text{NO}_3$   $[\text{M}-\text{H}]^-$ : 460.1913, found: 460.1923.

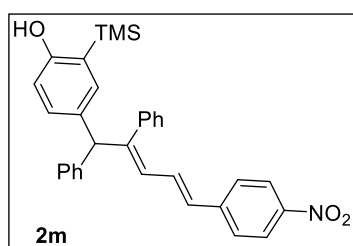

**4-((2Z,4E)-5-(4-nitrophenyl)-1,2-diphenylpenta-2,4-dien-1-yl)-2-(trimethylsilyl)phenol (2m)**

Compound **2m** (23.2 mg, 46% yield, 6.7:1 *E/Z*) was obtained as a yellowish solid following the *general procedure III* from **3m** (0.15 mmol, 49 mg) and **1a** (0.1 mmol, 25 mg) stirred for 12 hours. **<sup>1</sup>H NMR** (400 MHz, CDCl<sub>3</sub>) δ 8.09-8.06 (m, 2H), 7.35-7.28 (m, 8H), 7.24-7.20 (m, 4H), 7.15 (d, *J* = 2.0 Hz, 1H), 7.04 (dd, *J*<sub>1</sub> = 8.0 Hz, *J*<sub>2</sub> = 2.0 Hz, 1H), 6.95 (dd, *J*<sub>1</sub> = 15.6 Hz, *J*<sub>2</sub> = 11.2 Hz, 1H), 6.62 (d, *J* = 8.0 Hz, 1H), 6.49 (d, *J* = 15.6 Hz, 1H), 6.03 (d, *J* = 11.2 Hz, 1H), 5.23 (s, 1H), 4.81 (s, 1H), 0.26 (s, 9H); **<sup>13</sup>C{<sup>1</sup>H} NMR** (100 MHz, CDCl<sub>3</sub>) δ 159.0, 150.5, 146.3, 144.1, 142.2, 140.8, 136.4, 133.2, 131.6, 131.0, 130.2, 130.0, 129.5, 128.9, 128.3, 128.2, 127.5, 126.6, 126.5, 125.2, 124.0, 114.4, 58.9, -1.0; **IR** (neat) ν 3494, 2951, 2920, 1587, 1511, 1398, 1338, 1073, 971, 838, 700 cm<sup>-1</sup>; **MP**: 70-72 °C; **HRMS** Calcd. for C<sub>32</sub>H<sub>30</sub>NO<sub>3</sub>Si [M-H]<sup>-</sup>: 504.1995, found: 504.1988.

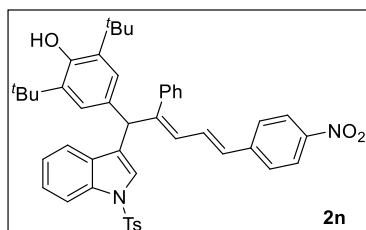

**2,6-Di-tert-butyl-4-((2Z,4E)-5-(4-nitrophenyl)-2-phenyl-1-(1-tosyl-1H-indol-3-yl)penta-2,4-dien-1-yl)phenol (2n)**

Compound **2n** (35.0 mg, 95% yield) was obtained as a yellowish solid following the *general procedure III* from **3n** (0.075 mmol, 37 mg) and **1a** (0.05 mmol, 13 mg) stirred for 12 hours. **<sup>1</sup>H NMR** (400 MHz, CDCl<sub>3</sub>) δ 8.08-8.06 (m, 2H), 7.99 (d, *J* = 8.4 Hz, 1H), 7.64-7.61 (m, 2H), 7.41 (d, *J* = 7.6 Hz, 1H), 7.36-7.28 (m, 6H), 7.24-7.16 (m, 5H), 7.00 (d, *J* = 1.2 Hz, 1H), 6.99-6.92 (m, 3H), 6.40 (d, *J* = 15.6 Hz, 1H), 6.08 (d, *J* = 11.2 Hz, 1H), 5.17 (s, 1H), 5.14 (s, 1H), 2.35 (s, 3H), 1.37 (s, 18H); **<sup>13</sup>C{<sup>1</sup>H} NMR** (100 MHz, CDCl<sub>3</sub>) δ 152.7, 147.5, 146.3, 144.7, 144.0, 140.5, 135.7, 135.1, 130.8, 130.5, 130.4, 130.2, 129.8, 129.3, 129.0, 128.2, 127.6, 126.7, 126.6, 126.2, 126.0, 125.5, 124.8, 124.0, 123.3, 120.3, 113.8, 50.7, 34.3, 30.3, 21.6; **IR** (neat) ν 3629, 2957, 1590, 1511, 1434, 1369, 1340, 1172, 1118, 977, 745, 703, 660, 570 cm<sup>-1</sup>; **MP**: 104-106 °C; **HRMS**

Calcd. for  $C_{46}H_{45}N_2O_5S$   $[M-H]^-$ : 737.3054, found: 737.3049.

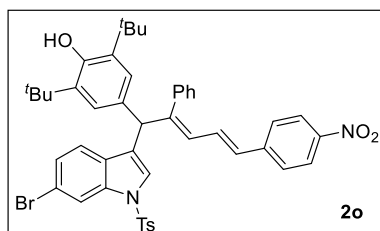

**4-((2Z,4E)-1-(6-bromo-1-tosyl-1H-indol-3-yl)-5-(4-nitrophenyl)-2-phenylpenta-2,4-dien-1-yl)-2,6-di-tert-butylphenol (2o)**

Compound **2o** (37.9 mg, 93% yield) was obtained as a yellowish solid following the *general procedure III* from **3o** (0.075 mmol, 42 mg) and **1a** (0.05 mmol, 13 mg) stirred for 12 hours.  $^1H$  NMR (400 MHz,  $CDCl_3$ )  $\delta$  8.18 (d,  $J$  = 1.6 Hz, 1H), 8.10-8.08 (m, 2H), 7.63 (d,  $J$  = 8.4 Hz, 2H), 7.34-7.29 (m, 6H), 7.27 (s, 1H), 7.25-7.19 (m, 4H), 6.99-6.92 (m, 4H), 6.42 (d,  $J$  = 15.6 Hz, 1H), 6.05 (d,  $J$  = 11.2 Hz, 1H), 5.17 (s, 1H), 5.15 (s, 1H), 2.39 (s, 3H), 1.38 (s, 18H);  $^{13}C\{^1H\}$  NMR (100 MHz,  $CDCl_3$ )  $\delta$  152.7, 147.2, 146.4, 145.1, 143.9, 140.2, 136.3, 135.8, 134.8, 130.7, 130.6, 130.0, 129.9, 129.4, 129.3, 128.9, 128.3, 127.7, 126.7, 126.6, 126.3, 125.9, 125.4, 124.0, 121.5, 118.5, 116.9, 115.2, 50.6, 34.3, 30.3, 21.6; IR (neat)  $\nu$  3632, 2957, 2923, 1590, 1516, 1432, 1372, 1340, 1172, 1129, 980, 810, 742, 703, 669, 576  $cm^{-1}$ ; MP: 102-104  $^{\circ}C$ ; HRMS Calcd. for  $C_{46}H_{44}N_2O_5SBr$   $[M-H]^-$ : 815.2160, found: 815.2175.

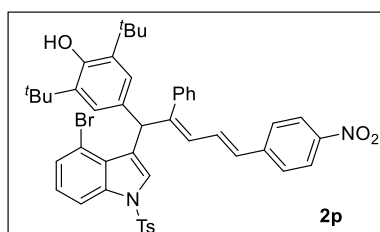

**4-((2Z,4E)-1-(4-bromo-1-tosyl-1H-indol-3-yl)-5-(4-nitrophenyl)-2-phenylpenta-2,4-dien-1-yl)-2,6-di-tert-butylphenol (2p)**

Compound **2p** (30.2 mg, 74% yield, 9.6:1 *E/Z*) was obtained as a yellowish solid following the *general procedure III* from **3p** (0.075 mmol, 42 mg) and **1a** (0.05 mmol, 13 mg) stirred for 12 hours.  $^1H$  NMR (400 MHz,  $CDCl_3$ )  $\delta$  8.09 (d,  $J$  = 8.8 Hz, 2H), 7.99 (d,  $J$  = 8.4 Hz, 1H), 7.59 (d,  $J$  = 8.4 Hz, 2H), 7.38-7.28 (m, 8H), 7.20 (d,  $J$  = 8.0 Hz, 2H), 7.15-7.08 (m, 2H), 7.05-7.02 (m, 3H), 6.37 (d,  $J$  = 15.6 Hz, 1H), 5.92 (d,  $J$  =

11.2 Hz, 1H), 5.90 (s, 1H), 5.15 (s, 1H), 2.37 (s, 3H), 1.40 (s, 18H);  $^{13}\text{C}\{^1\text{H}\}$  NMR (100 MHz,  $\text{CDCl}_3$ )  $\delta$  152.5, 148.6, 146.3, 145.1, 144.2, 140.2, 136.9, 135.7, 134.6, 131.1, 131.0, 130.4, 129.9, 129.4, 129.2, 128.4, 128.3, 128.1, 127.5, 126.7, 126.6, 126.2, 125.9, 125.5, 124.0, 115.2, 114.7, 113.0, 50.0, 34.4, 30.4, 21.6; **IR** (neat)  $\nu$  3632, 2960, 1590, 1516, 1432, 1375, 1338, 1169, 982, 742, 700, 666, 570  $\text{cm}^{-1}$ ; **MP**: 108-110  $^\circ\text{C}$ ; **HRMS** Calcd. for  $\text{C}_{46}\text{H}_{44}\text{N}_2\text{O}_5\text{SBr}$   $[\text{M}-\text{H}]^-$ : 815.2160, found: 815.2174.

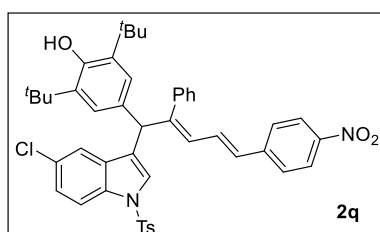

**2,6-Di-tert-butyl-4-((2Z,4E)-1-(5-chloro-1-tosyl-1H-indol-3-yl)-5-(4-nitrophenyl)-2-phenylpenta-2,4-dien-1-yl)phenol (2q)**

Compound **2q** (35.1 mg, 91% yield) was obtained as a yellowish solid following the *general procedure III* from **3q** (0.075 mmol, 39 mg) and **1a** (0.05 mmol, 13 mg) stirred for 12 hours.  $^1\text{H}$  NMR (400 MHz,  $\text{CDCl}_3$ )  $\delta$  8.09 (d,  $J$  = 8.8 Hz, 2H), 7.92 (d,  $J$  = 8.8 Hz, 1H), 7.61 (d,  $J$  = 8.4 Hz, 2H), 7.35-7.33 (m, 6H), 7.27-7.19 (m, 5H), 7.06 (s, 1H), 7.00-6.93 (m, 3H), 6.43 (d,  $J$  = 15.6 Hz, 1H), 6.06 (d,  $J$  = 11.2 Hz, 1H), 5.18 (s, 1H), 5.15 (s, 1H), 2.37 (s, 3H), 1.39 (s, 18H);  $^{13}\text{C}\{^1\text{H}\}$  NMR (100 MHz,  $\text{CDCl}_3$ )  $\delta$  152.8, 147.2, 146.4, 145.0, 143.9, 140.2, 135.8, 134.7, 134.0, 131.7, 130.7, 130.6, 129.9, 129.4, 129.1, 129.0, 128.3, 127.7, 127.2, 126.7, 126.6, 125.5, 125.4, 125.1, 124.0, 120.0, 115.2, 114.9, 50.5, 34.3, 30.3, 21.6; **IR** (neat)  $\nu$  3632, 2957, 2920, 1590, 1514, 1440, 1372, 1340, 1172, 1121, 974, 813, 700, 672, 584, 536  $\text{cm}^{-1}$ ; **MP**: 239-241  $^\circ\text{C}$ ; **HRMS** Calcd. for  $\text{C}_{46}\text{H}_{44}\text{N}_2\text{O}_5\text{SCl}$   $[\text{M}-\text{H}]^-$ : 771.2659, found: 771.2665.

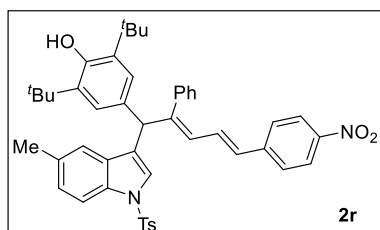

**2,6-Di-tert-butyl-4-((2Z,4E)-1-(5-methyl-1-tosyl-1H-indol-3-yl)-5-(4-nitrophenyl)-2-phenylpenta-2,4-dien-1-yl)phenol (2r)**

## 2-phenylpenta-2,4-dien-1-yl)phenol (2r)

Compound **2r** (32.7 mg, 87% yield) was obtained as a yellowish solid following the *general procedure III* from **3r** (0.075 mmol, 37 mg) and **1a** (0.05 mmol, 13 mg) stirred for 12 hours. **<sup>1</sup>H NMR** (400 MHz, CDCl<sub>3</sub>) δ 8.09 (d, *J* = 8.8 Hz, 2H), 7.87 (d, *J* = 8.4 Hz, 1H), 7.62 (d, *J* = 8.4 Hz, 2H), 7.37-7.31 (m, 5H), 7.25-7.23 (m, 2H), 7.19-7.17 (m, 3H), 7.13-7.10 (m, 1H), 7.01-6.94 (m, 4H), 6.41 (d, *J* = 15.6 Hz, 1H), 6.09 (d, *J* = 11.2 Hz, 1H), 5.16 (s, 1H), 5.15 (s, 1H), 2.36 (s, 3H), 2.35 (s, 3H), 1.39 (s, 18H); **<sup>13</sup>C{<sup>1</sup>H} NMR** (100 MHz, CDCl<sub>3</sub>) δ 152.6, 147.6, 146.4, 144.6, 144.1, 140.5, 135.7, 135.1, 134.0, 132.9, 130.9, 130.8, 130.4, 130.3, 129.7, 129.2, 129.0, 128.2, 127.6, 126.64, 126.60, 126.2, 126.1, 125.5, 124.0, 120.1, 113.5, 50.7, 34.4, 30.4, 21.6, 21.4; **IR** (neat) ν 3632, 2954, 2867, 1590, 1514, 1434, 1369, 1338, 1172, 1118, 977, 807, 675 cm<sup>-1</sup>; **MP**: 233-235 °C; **HRMS** Calcd. for C<sub>47</sub>H<sub>47</sub>N<sub>2</sub>O<sub>5</sub>S [M-H]<sup>-</sup>: 751.3206, found: 751.3197.

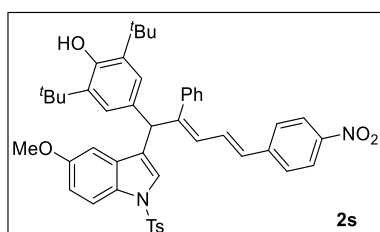

## 2,6-Di-tert-butyl-4-((2Z,4E)-1-(5-methoxy-1-tosyl-1H-indol-3-yl)-5-(4-nitrophenyl)-2-phenylpenta-2,4-dien-1-yl)phenol (2s)

Compound **2s** (32.6 mg, 85% yield) was obtained as a yellowish solid following the *general procedure III* from **3s** (0.075 mmol, 39 mg) and **1a** (0.05 mmol, 13 mg) stirred for 12 hours. **<sup>1</sup>H NMR** (400 MHz, CDCl<sub>3</sub>) δ 8.09 (d, *J* = 8.8 Hz, 2H), 7.89 (d, *J* = 8.8 Hz, 1H), 7.61 (d, *J* = 8.0 Hz, 2H), 7.35-7.32 (m, 5H), 7.24-7.21 (m, 2H), 7.18 (d, *J* = 8.0 Hz, 2H), 7.00-6.97 (m, 4H), 6.91 (dd, *J*<sub>1</sub> = 8.8 Hz, *J*<sub>2</sub> = 2.4 Hz, 1H), 6.80 (d, *J* = 2.4 Hz, 1H), 6.41 (d, *J* = 15.6 Hz, 1H), 6.10 (d, *J* = 11.2 Hz, 1H), 5.16 (s, 1H), 5.12 (s, 1H), 3.72 (s, 3H), 2.36 (s, 3H), 1.39 (s, 18H); **<sup>13</sup>C{<sup>1</sup>H} NMR** (100 MHz, CDCl<sub>3</sub>) δ 156.3, 152.7, 147.3, 146.4, 144.6, 144.0, 140.5, 135.8, 135.0, 131.6, 130.8, 130.5, 130.4, 130.2, 129.7, 129.4, 128.9, 128.3, 127.6, 126.7, 126.6, 126.4, 125.5, 124.0, 114.8, 113.3, 103.1, 55.5, 50.8, 34.3, 30.4, 21.6; **IR** (neat) ν 3617, 2960, 2920, 2856, 1590, 1514, 1432, 1339, 1170, 1029, 978, 798 cm<sup>-1</sup>; **MP**: 114-116 °C; **HRMS** Calcd. for C<sub>47</sub>H<sub>47</sub>N<sub>2</sub>O<sub>6</sub>S

[M-H]<sup>-</sup>: 767.3155, found: 767.3146.

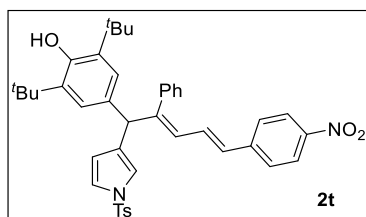

**2,6-Di-tert-butyl-4-((2Z,4E)-5-(4-nitrophenyl)-2-phenyl-1-(1-tosyl-1H-pyrrol-3-yl)penta-2,4-dien-1-yl)phenol (2t)**

Compound **2t** (28.2 mg, 82% yield) was obtained as a yellowish solid following the *general procedure III* from **3t** (0.075 mmol, 33 mg) and **1a** (0.05 mmol, 13 mg) stirred for 12 hours. **<sup>1</sup>H NMR** (400 MHz, CDCl<sub>3</sub>) δ 8.09 (d, *J* = 8.8 Hz, 2H), 7.66 (d, *J* = 8.4 Hz, 2H), 7.33 (d, *J* = 8.8 Hz, 2H), 7.28-7.26 (m, 5H), 7.12 (dd, *J*<sub>1</sub> = 3.2 Hz, *J*<sub>2</sub> = 2.4 Hz, 1H), 7.07-7.05 (m, 2H), 6.91-6.84 (m, 3H), 6.77 (brs, 1H), 6.50 (d, *J* = 15.6 Hz, 1H), 6.20 (dd, *J*<sub>1</sub> = 3.2 Hz, *J*<sub>2</sub> = 1.6 Hz, 1H), 6.13 (d, *J* = 10.8 Hz, 1H), 5.10 (s, 1H), 4.90 (s, 1H), 2.42 (s, 3H), 1.34 (s, 18H); **<sup>13</sup>C{<sup>1</sup>H} NMR** (100 MHz, CDCl<sub>3</sub>) δ 152.4, 149.9, 146.3, 144.7, 144.1, 140.3, 136.1, 135.4, 131.4, 131.3, 131.1, 130.0, 129.9, 129.1, 128.7, 128.0, 127.4, 126.64, 126.56, 125.5, 124.0, 121.2, 119.7, 115.4, 52.2, 34.3, 30.3, 21.6; **IR** (neat) ν 3629, 2957, 1590, 1514, 1432, 1369, 1341, 1172, 1098, 1059, 978, 703, 675, 587 cm<sup>-1</sup>; **MP**: 85-87 °C; **HRMS** Calcd. for C<sub>42</sub>H<sub>43</sub>N<sub>2</sub>O<sub>5</sub>S [M-H]<sup>-</sup>: 687.2893, found: 687.2895.

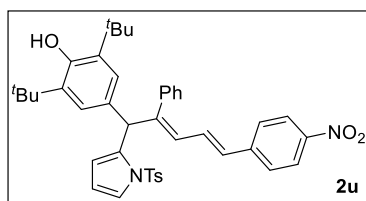

**2,6-Di-tert-butyl-4-((2Z,4E)-5-(4-nitrophenyl)-2-phenyl-1-(1-tosyl-1H-pyrrol-2-yl)penta-2,4-dien-1-yl)phenol (2u)**

Compound **2u** (23.0 mg, 67% yield) was obtained as a yellowish solid following the *general procedure III* from **3u** (0.075 mmol, 33 mg) and **1a** (0.05 mmol, 13 mg) stirred for 12 hours. **<sup>1</sup>H NMR** (400 MHz, CDCl<sub>3</sub>) δ 8.08 (d, *J* = 8.8 Hz, 2H), 7.48 (d, *J* = 8.4 Hz, 2H), 7.37 (dd, *J*<sub>1</sub> = 3.2 Hz, *J*<sub>2</sub> = 1.6 Hz, 1H), 7.34-7.29 (m, 7H), 7.08 (d, *J* = 8.0 Hz,

2H), 6.83 (dd,  $J_1 = 15.6$  Hz,  $J_2 = 11.2$  Hz, 1H), 6.75 (s, 2H), 6.32 (d,  $J = 15.6$  Hz, 1H), 6.24 (t,  $J = 3.2$  Hz, 1H), 5.85-5.84 (m, 1H), 5.75 (d,  $J = 11.2$  Hz, 1H), 5.65 (s, 1H), 5.03 (s, 1H), 2.18 (s, 3H), 1.32 (s, 18H);  $^{13}\text{C}\{^1\text{H}\}$  NMR (100 MHz,  $\text{CDCl}_3$ )  $\delta$  152.4, 148.8, 146.3, 144.4, 144.2, 140.1, 136.6, 136.3, 135.4, 130.9, 130.4, 129.9, 129.7, 129.3, 128.8, 128.1, 127.4, 126.7, 126.5, 125.7, 124.0, 123.3, 116.5, 111.3, 51.0, 34.2, 30.3, 21.4; IR (neat)  $\nu$  3632, 2957, 2923, 2872, 1590, 1514, 1432, 1338, 1172, 974, 810, 672, 587, 545  $\text{cm}^{-1}$ ; MP: 81-83  $^\circ\text{C}$ ; HRMS (ESI) Calcd. for  $\text{C}_{42}\text{H}_{43}\text{N}_2\text{O}_5\text{S}$   $[\text{M}-\text{H}]^-$ : 687.2893, found: 687.2885.

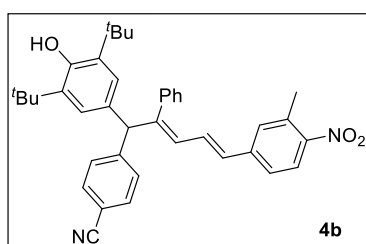

**4-((2Z,4E)-1-(3,5-di-tert-butyl-4-hydroxyphenyl)-5-(3-methyl-4-nitrophenyl)-2-phenylpenta-2,4-dien-1-yl)benzonitrile (4b)**

Compound **4b** (43.2 mg, 74% yield) was obtained as a yellowish solid following the *general procedure III* from **3b** (0.15 mmol, 48 mg) and **1b** (0.1 mmol, 27 mg) stirred for 12 hours.  $^1\text{H}$  NMR (400 MHz,  $\text{CDCl}_3$ )  $\delta$  7.90 (d,  $J = 8.4$  Hz, 1H), 7.60 (d,  $J = 8.4$  Hz, 2H), 7.36-7.28 (m, 5H), 7.24-7.14 (m, 4H), 6.94-6.85 (m, 3H), 6.45 (d,  $J = 15.6$  Hz, 1H), 5.98 (d,  $J = 11.2$  Hz, 1H), 5.26 (s, 1H), 5.17 (s, 1H), 2.55 (s, 3H), 1.39 (s, 18H);  $^{13}\text{C}\{^1\text{H}\}$  NMR (100 MHz,  $\text{CDCl}_3$ )  $\delta$  152.6, 148.5, 147.3, 142.3, 140.2, 135.9, 134.4, 132.1, 130.8, 130.53, 130.47, 130.2, 130.0, 129.6, 129.0, 128.3, 127.7, 126.0, 125.4, 124.1, 120.6, 119.0, 115.2, 110.1, 59.5, 34.3, 30.2, 21.0; IR (neat)  $\nu$  3626, 2958, 2228, 1604, 1577, 1513, 1434, 1338, 1234, 1152, 1118, 971, 840, 738, 703  $\text{cm}^{-1}$ ; MP: 179-181  $^\circ\text{C}$ ; HRMS Calcd. for  $\text{C}_{39}\text{H}_{39}\text{N}_2\text{O}_3$   $[\text{M}-\text{H}]^-$ : 583.2961, found: 583.2964.

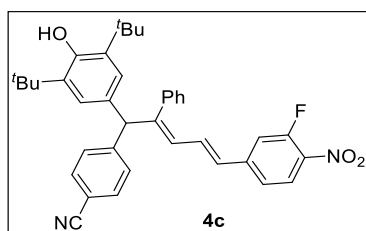



**4-((2Z,4E)-1-(3,5-di-tert-butyl-4-hydroxyphenyl)-5-(3-fluoro-4-nitrophenyl)-2-phenylpenta-2,4-dien-1-yl)benzonitrile (4c)**

Compound **4c** (38.8 mg, 66% yield) was obtained as a yellowish solid following the *general procedure III* from **3b** (0.15 mmol, 48 mg) and **1c** (0.1 mmol, 27 mg) stirred for 12 hours. **<sup>1</sup>H NMR** (400 MHz, CDCl<sub>3</sub>) δ 7.97-7.93 (m, 1H), 7.59 (d, *J* = 8.4 Hz, 2H), 7.37-7.31 (m, 5H), 7.19-7.16 (m, 2H), 7.10- 7.05 (m, 2H), 6.94-6.87 (m, 3H), 6.43 (d, *J* = 15.6 Hz, 1H), 5.99 (d, *J* = 10.8 Hz, 1H), 5.25 (s, 1H), 5.16 (s, 1H), 1.38 (s, 18H); **<sup>13</sup>C{<sup>1</sup>H} NMR** (100 MHz, CDCl<sub>3</sub>) δ 156.0 (d, *J* = 263.1 Hz), 152.7, 150.3, 148.2, 145.6 (d, *J* = 8.5 Hz), 140.0, 136.0, 132.2, 131.8, 130.3, 130.2, 130.0, 129.6, 128.9, 128.4, 127.9, 126.5, 126.0, 122.0 (d, *J* = 3.3 Hz), 118.9, 115.0 (d, *J* = 21.3 Hz), 110.3, 59.6, 34.4, 30.3; **<sup>19</sup>F NMR** (376 MHz, CDCl<sub>3</sub>) δ -116.82 to -116.88 (m). **IR** (neat) ν 3629, 2957, 2917, 2869, 2225, 1598, 1516, 1432, 1338, 1234, 968, 841, 734, 703 cm<sup>-1</sup>; **MP**: 89-91 °C; **HRMS** Calcd. for C<sub>38</sub>H<sub>36</sub>FN<sub>2</sub>O<sub>3</sub> [M-H]<sup>-</sup>: 587.2710, found: 587.2707.

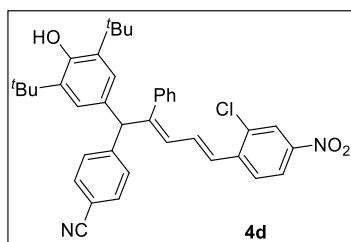

**4-((2Z,4E)-5-(2-chloro-4-nitrophenyl)-1-(3,5-di-tert-butyl-4-hydroxyphenyl)-2-phenylpenta-2,4-dien-1-yl)benzonitrile (4d)**

Compound **4d** (45.2 mg, 75% yield) was obtained as a yellowish solid following the *general procedure III* from **3b** (0.15 mmol, 48 mg) and **1d** (0.1 mmol, 29 mg) stirred for 12 hours. **<sup>1</sup>H NMR** (400 MHz, CDCl<sub>3</sub>) δ 8.20 (d, *J* = 2.4 Hz, 1H), 7.95 (dd, *J*<sub>1</sub> = 8.8 Hz, *J*<sub>2</sub> = 2.0 Hz, 1H), 7.61 (d, *J* = 8.4 Hz, 2H), 7.44 (d, *J* = 8.8 Hz, 1H), 7.35-7.30 (m, 5H), 7.19-7.16 (m, 2H), 6.97-6.84 (m, 4H), 6.08 (dd, *J*<sub>1</sub> = 10.2 Hz, *J*<sub>2</sub> = 1.2 Hz, 1H), 5.26 (s, 1H), 5.17 (s, 1H), 1.39 (s, 18H); **<sup>13</sup>C{<sup>1</sup>H} NMR** (100 MHz, CDCl<sub>3</sub>) δ 152.7, 150.3, 148.2, 146.4, 141.7, 140.0, 135.9, 133.2, 132.8, 132.2, 130.4, 130.2, 128.9, 128.3, 127.8, 126.7, 126.4, 126.0, 125.2, 121.7, 119.0, 110.3, 59.6, 34.4, 30.3; **IR** (neat) ν 3626, 2954, 2867, 2225, 1576, 1518, 1432, 1342, 1231, 1118, 974, 895, 734, 700 cm<sup>-1</sup>; **MP**: 182-184 °C; **HRMS** Calcd. for C<sub>38</sub>H<sub>36</sub>N<sub>2</sub>O<sub>3</sub>Cl [M-H]<sup>-</sup>: 603.2414, found: 603.2409.

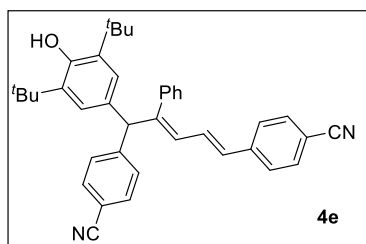

**4,4'-((1E,3Z)-5-(3,5-di-tert-butyl-4-hydroxyphenyl)-4-phenylpenta-1,3-diene-1,5-diyl)dibenzonitrile (4e)**

Compound **4e** (37.3 mg, 68% yield) was obtained as a yellowish solid following the *general procedure III* from **3b** (0.15 mmol, 48 mg) and **1e** (0.1 mmol, 23 mg) stirred for 12 hours. **<sup>1</sup>H NMR** (400 MHz, CDCl<sub>3</sub>) δ 7.59 (d, *J* = 8.4 Hz, 2H), 7.50 (d, *J* = 8.4 Hz, 2H), 7.34-7.28 (m, 7H), 7.20-7.18 (m, 2H), 6.92-6.85 (m, 3H), 6.46 (d, *J* = 15.6 Hz, 1H), 5.98 (d, *J* = 10.8 Hz, 1H), 5.25 (s, 1H), 5.16 (s, 1H), 1.38 (s, 18H); **<sup>13</sup>C{<sup>1</sup>H} NMR** (100 MHz, CDCl<sub>3</sub>) δ 152.6, 148.44, 148.40, 141.8, 140.2, 135.8, 132.3, 132.1, 131.1, 130.4, 130.2, 129.6, 128.9, 128.3, 127.6, 126.6, 126.0, 119.0, 110.19, 110.16, 59.4, 34.3, 30.2; **IR** (neat) ν 3629, 2956, 2225, 1598, 1497, 1434, 1234, 1152, 1118, 971, 813, 734, 700, 550 cm<sup>-1</sup>; **MP**: 199-201 °C; **HRMS** Calcd. for C<sub>39</sub>H<sub>37</sub>N<sub>2</sub>O [M-H]<sup>-</sup>: 549.2906, found: 549.2910.

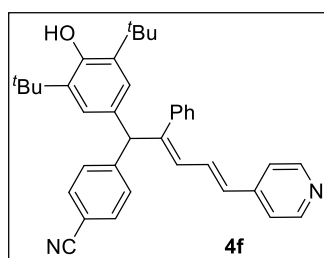

**4-((2Z,4E)-1-(3,5-di-tert-butyl-4-hydroxyphenyl)-2-phenyl-5-(pyridin-4-yl)penta-2,4-dien-1-yl)benzonitrile (4f)**

Compound **4f** (33.1 mg, 63% yield) was obtained as a yellowish solid following the *general procedure III* from **3b** (0.15 mmol, 48 mg) and **1f** (0.1 mmol, 21 mg) stirred for 12 hours. **<sup>1</sup>H NMR** (400 MHz, CDCl<sub>3</sub>) δ 8.44 (s, 2H), 7.60-7.58 (m, 2H), 7.35-7.28 (m, 5H), 7.19-7.17 (m, 2H), 7.08 (d, *J* = 5.6 Hz, 2H), 6.97 (dd, *J*<sub>1</sub> = 15.6 Hz, *J*<sub>2</sub> = 11.2 Hz, 1H), 6.91 (s, 2H), 6.39 (d, *J* = 15.6 Hz, 1H), 5.98 (d, *J* = 11.2 Hz, 1H), 5.25 (s, 1H), 5.19 (s, 1H), 1.38 (s, 18H); **<sup>13</sup>C{<sup>1</sup>H} NMR** (100 MHz, CDCl<sub>3</sub>) δ 152.7, 149.9, 148.8,

148.4, 144.5, 140.1, 135.9, 132.1, 130.4, 130.32, 130.25, 130.2, 128.9, 128.3, 127.7, 126.0, 120.6, 119.0, 110.2, 59.5, 34.3, 30.2; **IR** (neat)  $\nu$  3629, 2957, 2869, 2225, 1590, 1434, 1234, 1118, 971, 737, 703  $\text{cm}^{-1}$ ; **MP**: 94-96  $^{\circ}\text{C}$ ; **HRMS** Calcd. for  $\text{C}_{37}\text{H}_{37}\text{N}_2\text{O}$   $[\text{M}-\text{H}]^-$ : 525.2906, found: 525.2899.

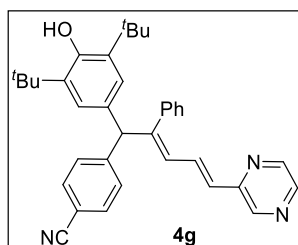

**4-((2Z,4E)-1-(3,5-di-tert-butyl-4-hydroxyphenyl)-2-phenyl-5-(pyrazin-2-yl)penta-2,4-dien-1-yl)benzonitrile (4g)**

Compound **4g** (35.2 mg, 67% yield) was obtained as a yellowish solid following the *general procedure III* from **3b** (0.15 mmol, 48 mg) and **1g** (0.1 mmol, 21 mg) stirred for 12 hours.  **$^1\text{H}$  NMR** (400 MHz,  $\text{CDCl}_3$ )  $\delta$  8.42-8.39 (m, 2H), 8.28 (d,  $J = 2.4$  Hz, 1H), 7.60-7.58 (m, 2H), 7.39-7.27 (m, 6H), 7.20-7.17 (m, 2H), 6.92 (s, 2H), 6.54 (d,  $J = 15.6$  Hz, 1H), 6.05 (d,  $J = 11.2$  Hz, 1H), 5.26 (s, 1H), 5.16 (s, 1H), 1.38 (s, 18H);  **$^{13}\text{C}\{^1\text{H}\}$  NMR** (100 MHz,  $\text{CDCl}_3$ )  $\delta$  152.7, 151.4, 149.8, 148.4, 144.2, 143.4, 142.2, 140.1, 135.9, 132.4, 132.1, 130.5, 130.3, 130.2, 128.93, 128.87, 128.3, 127.7, 126.0, 119.0, 110.2, 59.6, 34.4, 30.3; **IR** (neat)  $\nu$  3632, 2960, 2869, 2231, 1627, 1604, 1471, 1434, 1398, 1231, 1118, 1016, 980, 737, 700  $\text{cm}^{-1}$ ; **MP**: 92-94  $^{\circ}\text{C}$ ; **HRMS** Calcd. for  $\text{C}_{36}\text{H}_{36}\text{N}_3\text{O}$   $[\text{M}-\text{H}]^-$ : 526.2858, found: 526.2850.

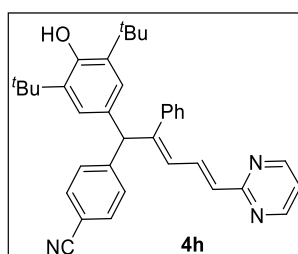

**4-((2Z,4E)-1-(3,5-di-tert-butyl-4-hydroxyphenyl)-2-phenyl-5-(pyrimidin-2-yl)penta-2,4-dien-1-yl)benzonitrile (4h)**

Compound **4h** (42.6 mg, 81% yield) was obtained as a yellowish solid following the

*general procedure III* from **3b** (0.15 mmol, 48 mg) and **1h** (0.1 mmol, 21 mg) stirred for 12 hours. **<sup>1</sup>H NMR** (400 MHz, CDCl<sub>3</sub>) δ 8.58 (d, *J* = 4.9 Hz, 2H), 7.63-7.56 (m, 3H), 7.35-7.28 (m, 5H), 7.20-7.18 (m, 2H), 7.00-6.96 (m, 1H), 6.92 (s, 2H), 6.61 (d, *J* = 15.6 Hz, 1H), 6.10 (d, *J* = 11.2 Hz, 1H), 5.26 (s, 1H), 5.16 (s, 1H), 1.38 (s, 18H); **<sup>13</sup>C{<sup>1</sup>H} NMR** (100 MHz, CDCl<sub>3</sub>) δ 164.8, 156.9, 152.7, 150.2, 148.4, 140.2, 135.9, 135.3, 132.2, 132.1, 130.6, 130.4, 130.2, 129.0, 128.3, 127.6, 126.0, 119.0, 118.2, 110.2, 59.7, 34.4, 30.3; **IR** (neat) ν 3638, 2957, 2920, 2872, 2231, 1607, 1564, 1550, 1432, 1412, 1234, 1152, 1118, 985, 737, 703 cm<sup>-1</sup>; **MP**: 82-84 °C; **HRMS** Calcd. for C<sub>36</sub>H<sub>36</sub>N<sub>3</sub>O [M-H]<sup>-</sup>: 526.2858, found: 526.2851.

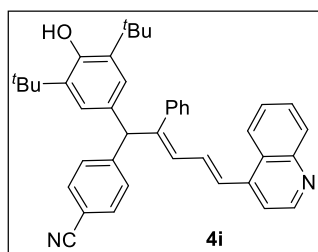

**4-((2Z,4E)-1-(3,5-di-tert-butyl-4-hydroxyphenyl)-2-phenyl-5-(quinolin-4-yl)penta-2,4-dien-1-yl)benzonitrile (4i)**

Compound **4i** (43.9 mg, 76% yield) was obtained as a yellowish solid following the *general procedure III* from **3b** (0.15 mmol, 48 mg) and **1i** (0.1 mmol, 26 mg) stirred for 12 hours. **<sup>1</sup>H NMR** (400 MHz, CDCl<sub>3</sub>) δ 8.74 (d, *J* = 4.8 Hz, 1H), 8.09-8.06 (m, 2H), 7.71-7.66 (m, 1H), 7.62 (d, *J* = 8.4 Hz, 2H), 7.55-7.51 (m, 1H), 7.39-7.37 (m, 2H), 7.34-7.27 (m, 4H), 7.23-7.18 (m, 3H), 7.05 (dd, *J*<sub>1</sub> = 15.2 Hz, *J*<sub>2</sub> = 10.8 Hz, 1H), 6.96 (s, 2H), 6.14 (d, *J* = 10.8 Hz, 1H), 5.29 (s, 1H), 5.19 (s, 1H), 1.40 (s, 18H); **<sup>13</sup>C{<sup>1</sup>H} NMR** (100 MHz, CDCl<sub>3</sub>) δ 152.7, 149.9, 149.0, 148.6, 148.5, 142.5, 140.2, 136.0, 132.2, 132.1, 130.6, 130.4, 130.3, 130.0, 129.2, 129.0, 128.3, 127.7, 126.7, 126.4, 126.01, 125.96, 123.2, 119.0, 116.6, 110.3, 59.5, 34.4, 30.3; **IR** (neat) ν 3632, 2954, 2869, 2225, 1604, 1573, 1502, 1434, 1234, 971, 762, 737, 703 cm<sup>-1</sup>; **MP**: 93-95 °C; **HRMS** Calcd. for C<sub>41</sub>H<sub>41</sub>N<sub>2</sub>O [M+H]<sup>+</sup>: 577.3213, found: 577.3205.

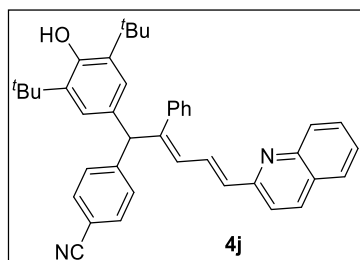

**4-((2Z,4E)-1-(3,5-di-tert-butyl-4-hydroxyphenyl)-2-phenyl-5-(quinolin-2-yl)penta-2,4-dien-1-yl)benzonitrile (4j)**

Compound **4j** (41.6 mg, 72% yield) was obtained as a yellowish solid following the *general procedure III* from **3b** (0.15 mmol, 48 mg) and **1j** (0.1 mmol, 26 mg) stirred for 12 hours.  $^1\text{H}$  NMR (400 MHz,  $\text{CDCl}_3$ )  $\delta$  8.00-7.96 (m, 2H), 7.72 (d,  $J = 8.0$  Hz, 1H), 7.67-7.63 (m, 1H), 7.59 (d,  $J = 8.4$  Hz, 2H), 7.47-7.40 (m, 2H), 7.37-7.33 (m, 4H), 7.31-7.27 (m, 2H), 7.25-7.23 (m, 2H), 6.93 (s, 2H), 6.82-6.76 (m, 1H), 6.10 (d,  $J = 11.2$  Hz, 1H), 5.27 (s, 1H), 5.16 (s, 1H), 1.39 (s, 18H);  $^{13}\text{C}\{^1\text{H}\}$  NMR (100 MHz,  $\text{CDCl}_3$ )  $\delta$  152.7, 148.4, 140.3, 135.9, 135.6, 132.2, 132.1, 131.0, 130.7, 130.3, 129.0, 128.3, 127.6, 127.4, 127.1, 126.0, 125.1, 119.0, 118.7, 110.2, 59.6, 34.4, 30.3; IR (neat)  $\nu$  3629, 2956, 2867, 2225, 1601, 1502, 1434, 1234, 1019, 974, 819, 738, 703  $\text{cm}^{-1}$ ; MP: 97-99  $^\circ\text{C}$ ; HRMS Calcd. for  $\text{C}_{41}\text{H}_{41}\text{N}_2\text{O}$   $[\text{M}+\text{H}]^+$ : 577.3213, found: 577.3202.

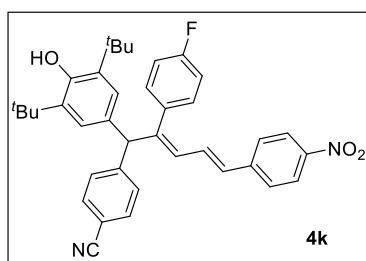

**4-((2Z,4E)-1-(3,5-di-tert-butyl-4-hydroxyphenyl)-2-(4-fluorophenyl)-5-(4-nitrophenyl)penta-2,4-dien-1-yl)benzonitrile (4k)**

Compound **4k** (51.1 mg, 87% yield) was obtained as a yellowish solid following the *general procedure III* from **3b** (0.15 mmol, 48 mg) and **1k** (0.1 mmol, 27 mg) stirred for 12 hours.  $^1\text{H}$  NMR (400 MHz,  $\text{CDCl}_3$ )  $\delta$  8.10 (d,  $J = 8.8$  Hz, 2H), 7.60 (d,  $J = 8.4$  Hz, 2H), 7.36-7.32 (m, 4H), 7.17-7.13 (m, 2H), 7.03 (t,  $J = 8.4$  Hz, 2H), 6.91-6.84 (m, 3H), 6.52 (d,  $J = 15.6$  Hz, 1H), 6.01 (d,  $J = 11.2$  Hz, 1H), 5.20 (s, 1H), 5.18 (s, 1H), 1.39 (s, 18H);  $^{13}\text{C}\{^1\text{H}\}$  NMR (100 MHz,  $\text{CDCl}_3$ )  $\delta$  162.1 (d,  $J = 246.4$  Hz), 152.8, 148.0

(d,  $J = 23.6$  Hz), 146.6, 143.7, 136.0, 132.2, 131.1, 130.64, 130.56, 130.2, 130.1, 126.7, 125.9, 124.0, 118.9, 115.4 (d,  $J = 21.2$  Hz), 110.4, 59.7, 34.4, 30.3;  **$^{19}\text{F}$  NMR** (376 MHz,  $\text{CDCl}_3$ ) -113.53 to -113.61 (m); **IR** (neat)  $\nu$  3629, 2957, 2872, 2228, 1587, 1511, 1435, 1336, 1231, 1155, 1107, 974, 850, 745  $\text{cm}^{-1}$ ; **MP**: 102-104  $^{\circ}\text{C}$ ; **HRMS** Calcd. for  $\text{C}_{38}\text{H}_{36}\text{FN}_2\text{O}_3$   $[\text{M}-\text{H}]^-$ : 587.2710, found: 587.2718.

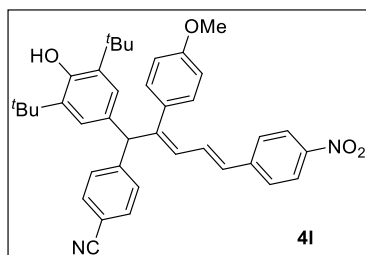

**4-((2Z,4E)-1-(3,5-di-tert-butyl-4-hydroxyphenyl)-2-(4-methoxyphenyl)-5-(4-nitrophenyl)penta-2,4-dien-1-yl)benzonitrile (4l)**

Compound **4l** (49.1 mg, 82% yield) was obtained as a yellowish solid following the *general procedure III* from **3b** (0.15 mmol, 48 mg) and **1l** (0.1 mmol, 28 mg) stirred for 12 hours.  **$^1\text{H}$  NMR** (400 MHz,  $\text{CDCl}_3$ )  $\delta$  8.09 (d,  $J = 8.8$  Hz, 2H), 7.59 (d,  $J = 8.0$  Hz, 2H), 7.36-7.31 (m, 4H), 7.13 (d,  $J = 8.4$  Hz, 2H), 6.98 (dd,  $J_1 = 15.6$  Hz,  $J_2 = 11.2$  Hz, 1H), 6.91 (s, 2H), 6.86 (d,  $J = 8.8$  Hz, 2H), 6.49 (d,  $J = 15.6$  Hz, 1H), 5.97 (d,  $J = 10.8$  Hz, 1H), 5.24 (s, 1H), 5.16 (s, 1H), 3.82 (s, 3H), 1.39 (s, 18H);  **$^{13}\text{C}\{^1\text{H}\}$  NMR** (100 MHz,  $\text{CDCl}_3$ )  $\delta$  159.1, 152.7, 148.8, 148.6, 146.4, 144.0, 135.9, 132.4, 132.1, 130.9, 130.6, 130.3, 130.22, 130.18, 130.1, 126.6, 126.0, 124.0, 119.0, 113.7, 110.2, 59.6, 55.2, 34.4, 30.3; **IR** (neat)  $\nu$  3626, 2956, 2867, 2228, 1604, 1589, 1511, 1434, 1338, 1247, 1178, 1107, 1028, 971, 844, 830, 736  $\text{cm}^{-1}$ ; **MP**: 112-114  $^{\circ}\text{C}$ ; **HRMS** Calcd. for  $\text{C}_{39}\text{H}_{39}\text{N}_2\text{O}_4$   $[\text{M}-\text{H}]^-$ : 599.2910, found: 599.2914.

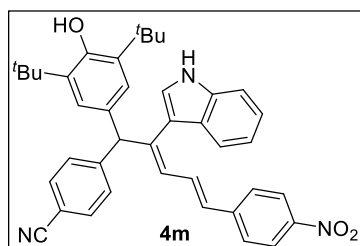

**4-((2Z,4E)-1-(3,5-di-tert-butyl-4-hydroxyphenyl)-2-(1H-indol-3-yl)-5-(4-**

**nitrophenyl)penta-2,4-dien-1-yl)benzonitrile (4m)**

Compound **4m** (52.4 mg, 86% yield) was obtained as a yellowish solid following the *general procedure III* from **3b** (0.15 mmol, 48 mg) and **1m** (0.1 mmol, 29 mg) stirred for 12 hours. <sup>1</sup>H NMR (400 MHz, CDCl<sub>3</sub>) δ 8.16 (d, *J* = 8.4 Hz, 2H), 7.97 (d, *J* = 7.6 Hz, 1H), 7.61 (d, *J* = 7.6 Hz, 2H), 7.50 (d, *J* = 8.0 Hz, 2H), 7.28-7.09 (m, 6H), 6.97-6.92 (m, 5H), 6.75 (s, 1H), 6.61 (d, *J* = 15.2 Hz, 1H), 5.38 (s, 1H), 1.38 (s, 18H); <sup>13</sup>C{<sup>1</sup>H} NMR (100 MHz, CDCl<sub>3</sub>) δ 154.2, 145.9, 145.6, 144.6, 137.4, 136.5, 135.2, 132.5, 129.5, 128.0, 127.8, 127.5, 127.0, 126.5, 126.1, 125.1, 124.1, 122.9, 121.2, 120.6, 118.5, 114.4, 111.6, 110.6, 63.8, 34.4, 30.1; IR (neat) ν 3632, 2960, 2223, 2231, 1584, 1508, 1336, 1234, 1107, 985, 742 cm<sup>-1</sup>; MP: 106-108 °C; HRMS Calcd. for C<sub>40</sub>H<sub>38</sub>N<sub>3</sub>O<sub>3</sub> [M-H]<sup>-</sup>: 608.2913, found: 608.2907.

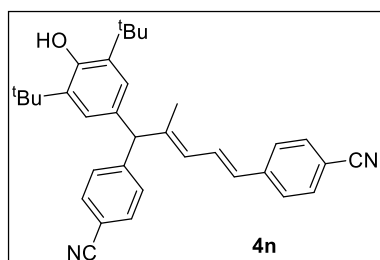**4,4'-((1E,3E)-5-(3,5-di-tert-butyl-4-hydroxyphenyl)-4-methylpenta-1,3-diene-1,5-diyl)dibenzonitrile (4n)**

Compound **4n** (28 mg, 58% yield) was obtained as a yellowish solid following the *general procedure III* from **3b** (0.15 mmol, 48 mg) and **1n** (0.1 mmol, 17 mg) stirred for 12 hours. <sup>1</sup>H NMR (400 MHz, CDCl<sub>3</sub>) δ 7.61-7.56 (m, 4H), 7.45 (d, *J* = 8.4 Hz, 2H), 7.28-7.26 (m, 2H), 7.16 (dd, *J*<sub>1</sub> = 15.2 Hz, *J*<sub>2</sub> = 11.2 Hz, 1H), 6.87 (s, 2H), 6.39 (d, *J* = 15.2 Hz, 1H), 5.78 (d, *J* = 11.2 Hz, 1H), 5.17 (s, 1H), 4.80 (s, 1H), 1.91 (s, 3H), 1.40 (s, 18H); <sup>13</sup>C{<sup>1</sup>H} NMR (100 MHz, CDCl<sub>3</sub>) δ 152.7, 148.5, 143.9, 142.1, 136.0, 132.4, 132.1, 130.7, 130.1, 130.0, 128.4, 128.2, 126.5, 125.7, 119.1, 119.0, 110.2, 60.3, 34.4, 30.3, 18.0; IR (neat) ν 3629, 2956, 2917, 2867, 2225, 1598, 1499, 1434, 1361, 1234, 1152, 1118, 966, 813, 738, 553 cm<sup>-1</sup>; MP: 102-104 °C; HRMS Calcd. for C<sub>34</sub>H<sub>35</sub>N<sub>2</sub>O [M-H]<sup>-</sup>: 487.2749, found: 487.2756.

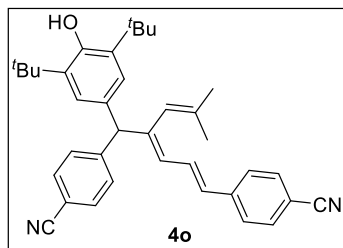

**4,4'-(5-(3,5-di-tert-butyl-4-hydroxyphenyl)-4-(2-methylprop-1-en-1-yl)penta-1,3-diene-1,5-diyl)dibenzonitrile (4o)**

Compound **4o** (22.8 mg, 44% yield, 5.6:1 *E/Z*) was obtained as a yellowish solid following the *general procedure III* from **3b** (0.15 mmol, 48 mg) and **1o** (0.1 mmol, 23 mg) stirred for 12 hours.  $^1\text{H}$  NMR (400 MHz,  $\text{CDCl}_3$ , major product)  $\delta$  7.63-7.51 (m, 5H), 7.41 (d,  $J$  = 8.4 Hz, 2H), 7.29-7.22 (m, 2H), 6.93-6.89 (m, 2H), 6.45 (d,  $J$  = 15.6 Hz, 1H), 5.93 (d,  $J$  = 10.8 Hz, 1H), 5.62 (s, 1H), 5.15 (s, 1H), 4.82 (s, 1H), 1.80 (d,  $J$  = 1.2 Hz, 3H), 1.49 (d,  $J$  = 0.8 Hz, 3H), 1.39 (s, 18H);  $^{13}\text{C}\{^1\text{H}\}$  NMR (100 MHz,  $\text{CDCl}_3$ )  $\delta$  152.6, 148.7, 145.7, 142.3, 138.1, 135.8, 132.4, 132.0, 130.8, 130.1, 130.0, 129.0, 126.4, 125.7, 123.3, 119.1, 110.1, 110.0, 59.1, 34.4 (minor), 34.3, 30.3, 25.9, 20.3; **IR** (neat)  $\nu$  3635, 2957, 2225, 1601, 1499, 1434, 1361, 1234, 1152, 1118, 1016, 977, 816, 737, 550  $\text{cm}^{-1}$ ; **MP**: 189-193  $^{\circ}\text{C}$ ; **HRMS** Calcd. for  $\text{C}_{37}\text{H}_{39}\text{N}_2\text{O}$   $[\text{M}-\text{H}]^-$ : 527.3062, found: 527.3058.

**General procedure (IV) for preparing compounds 5a-v**

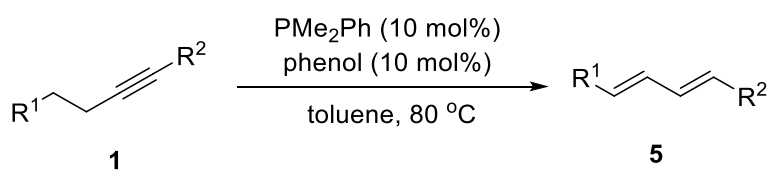

Compounds alkynes **1** (1.0 equiv.) phenol (0.1 equiv.) and anhydrous toluene were added to a oven dried vial under  $\text{N}_2$  protection, then  $\text{PMe}_2\text{Ph}$  (0.1 equiv.) was added to the above mixture at room temperature. The resulting mixture was stirred at 80  $^{\circ}\text{C}$  for 4 hours. The reaction mixture was then concentrated on a rotary evaporator under reduce pressure and the residue was subjected to purification by column chromatography ( $\text{Al}_2\text{O}_3$ , PE/EA = 20/1) to afford the corresponding product **5**.



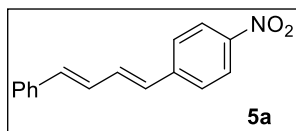

**1-nitro-4-((1E,3E)-4-phenylbuta-1,3-dien-1-yl)benzene (5a)**

This is a known compound.<sup>3a</sup> Compound **5a** (24.2 mg, 97% yield) was obtained as a yellow solid following the *general procedure IV* from **1a** (0.1 mmol, 25 mg) stirred for 4 hours. **<sup>1</sup>H NMR** (400 MHz, CDCl<sub>3</sub>) δ 8.19 (d, *J* = 8.8 Hz, 2H), 7.55 (d, *J* = 8.8 Hz, 2H), 7.48-7.46 (m, 2H), 7.36 (t, *J* = 7.2 Hz, 2H), 7.31-7.27 (m, 1H), 7.11 (dd, *J*<sub>1</sub> = 15.2 Hz, *J*<sub>2</sub> = 10.4 Hz, 1H), 6.98 (dd, *J*<sub>1</sub> = 15.6 Hz, *J*<sub>2</sub> = 10.4 Hz, 1H), 6.80 (d, *J* = 15.6 Hz, 1H), 6.70 (d, *J* = 15.2 Hz, 1H).

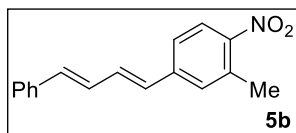

**2-Methyl-1-nitro-4-((1E,3E)-4-phenylbuta-1,3-dien-1-yl)benzene (5b)**

Compound **5b** (26.2 mg, 97% yield) was obtained as a yellow solid following the *general procedure IV* from **1b** (0.1 mmol, 27 mg) stirred for 4 hours. **<sup>1</sup>H NMR** (400 MHz, CDCl<sub>3</sub>) δ 8.01 (d, *J* = 8.4 Hz, 1H), 7.47 (d, *J* = 7.6 Hz, 2H), 7.39-7.34 (m, 4H), 7.29 (d, *J* = 7.6 Hz, 1H), 7.07 (dd, *J*<sub>1</sub> = 15.2 Hz, *J*<sub>2</sub> = 10.4 Hz, 1H), 6.96 (dd, *J*<sub>1</sub> = 15.2 Hz, *J*<sub>2</sub> = 10.4 Hz, 1H), 6.78 (d, *J* = 15.2 Hz, 1H), 6.64 (d, *J* = 15.2 Hz, 1H), 2.64 (s, 3H); **<sup>13</sup>C{<sup>1</sup>H} NMR** (100 MHz, CDCl<sub>3</sub>) δ 147.4, 142.3, 136.7, 135.6, 134.6, 133.2, 130.4, 130.1, 128.8, 128.3, 128.2, 126.7, 125.6, 124.2, 21.1; **IR** (neat) ν 3028, 1598, 1576, 1515, 1446, 1338, 1076, 997, 836, 751, 692 cm<sup>-1</sup>; **MP**: 106-107 °C; **HRMS** Calcd. for C<sub>17</sub>H<sub>16</sub>NO<sub>2</sub> [M+H]<sup>+</sup>: 266.1181, found: 266.1175.

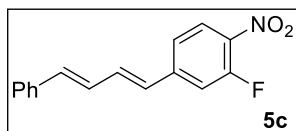

**2-Fluoro-1-nitro-4-((1E,3E)-4-phenylbuta-1,3-dien-1-yl)benzene (5c)**

Compound **5c** (23.2 mg, 86% yield) was obtained as a yellow solid following the *general procedure IV* from **1c** (0.1 mmol, 27 mg) stirred for 4 hours. **<sup>1</sup>H NMR** (400

MHz, CDCl<sub>3</sub>)  $\delta$  8.05 (t,  $J$  = 8.0 Hz, 1H), 7.49-7.46 (m, 2H), 7.39-7.35 (m, 2H), 7.32-7.27 (m, 3H), 7.09 (dd,  $J_1$  = 15.2 Hz,  $J_2$  = 10.4 Hz, 1H), 6.96 (dd,  $J_1$  = 15.2 Hz,  $J_2$  = 10.4 Hz, 1H), 6.83 (d,  $J$  = 15.2 Hz, 1H), 6.62 (d,  $J$  = 15.2 Hz, 1H); **<sup>13</sup>C{<sup>1</sup>H} NMR** (100 MHz, CDCl<sub>3</sub>)  $\delta$  156.1 (d,  $J$  = 263.0 Hz), 145.7 (d,  $J$  = 8.6 Hz), 137.1, 136.4, 134.9, 128.8, 128.6, 127.8, 126.8, 126.7 (d,  $J$  = 2.5 Hz), 121.9 (d,  $J$  = 3.4 Hz), 114.9 (d,  $J$  = 21.5 Hz); **<sup>19</sup>F NMR** (376 MHz, CDCl<sub>3</sub>) -116.71 to -116.76 (m); **IR** (neat)  $\nu$  2957, 2923, 1587, 1505, 1336, 1242, 1090, 982, 838, 745, 692 cm<sup>-1</sup>; **MP**: 111-113 °C; **HRMS** Calcd. for C<sub>16</sub>H<sub>11</sub>FNO<sub>2</sub> [M-H]<sup>-</sup>: 268.0774, found: 268.0769.

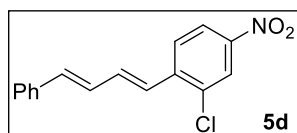

#### 2-chloro-4-nitro-1-((1E,3E)-4-phenylbuta-1,3-dien-1-yl)benzene (**5d**)

Compound **5d** (25.8 mg, 89% yield) was obtained as a yellow solid following the *general procedure IV* from **1d** (0.1 mmol, 29 mg) stirred for 4 hours. **<sup>1</sup>H NMR** (400 MHz, CDCl<sub>3</sub>)  $\delta$  8.26 (d,  $J$  = 2.4 Hz, 1H), 8.09 (d,  $J$  = 8.4 Hz, 1H), 7.77 (d,  $J$  = 8.8 Hz, 1H), 7.49 (d,  $J$  = 7.6 Hz, 2H), 7.37 (t,  $J$  = 7.6 Hz, 2H), 7.32-7.28 (m, 1H), 7.15-7.13 (m, 3H), 6.84 (d,  $J$  = 15.6 Hz, 1H); **<sup>13</sup>C{<sup>1</sup>H} NMR** (100 MHz, CDCl<sub>3</sub>)  $\delta$  146.4, 141.7, 137.1, 136.4, 135.8, 133.3, 128.8, 128.6, 128.3, 126.9, 126.11, 126.08, 125.3, 121.9; **HRMS** Calcd. for C<sub>16</sub>H<sub>12</sub>NO<sub>2</sub>Cl [M]<sup>+</sup>: 285.0557, found: 285.0551.

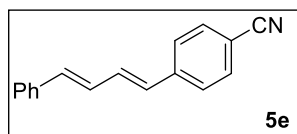

#### 4-((1E,3E)-4-phenylbuta-1,3-dien-1-yl)benzonitrile (**5e**)

This is a known compound.<sup>3b</sup> Compound **5e** (16.5 mg, 72% yield) was obtained as a white solid following the *general procedure IV* from **1e** (0.1 mmol, 23 mg) stirred at 120 °C for 48 hours. **<sup>1</sup>H NMR** (400 MHz, CDCl<sub>3</sub>)  $\delta$  7.60 (d,  $J$  = 8.0 Hz, 2H), 7.53-7.42 (m, 4H), 7.36 (t,  $J$  = 7.6 Hz, 2H), 7.29 (d,  $J$  = 7.6 Hz, 1H), 7.09-6.93 (m, 2H), 6.77 (d,  $J$  = 15.2 Hz, 1H), 6.65 (d,  $J$  = 15.2 Hz, 1H).

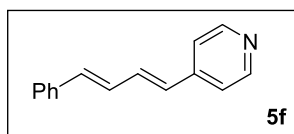

#### 4-((1E,3E)-4-phenylbuta-1,3-dien-1-yl)pyridine (**5f**)

This is a known compound.<sup>3c</sup> Compound **5f** (16.2 mg, 77% yield) was obtained as a yellow solid following the *general procedure IV* from **1f** (0.1 mmol, 21 mg) stirred at 120 °C for 48 hours. **<sup>1</sup>H NMR** (400 MHz, CDCl<sub>3</sub>) δ 8.54 (d, *J* = 5.2 Hz, 2H), 7.47 (d, *J* = 8.0 Hz, 2H), 7.36 (t, *J* = 7.6 Hz, 2H), 7.31-7.28 (m, 3H), 7.15 (dd, *J*<sub>1</sub> = 15.2 Hz, *J*<sub>2</sub> = 10.4 Hz, 1H), 6.96 (dd, *J*<sub>1</sub> = 15.6 Hz, *J*<sub>2</sub> = 10.4 Hz, 1H), 6.80 (d, *J* = 15.2 Hz, 1H), 6.58 (d, *J* = 15.6 Hz, 1H).

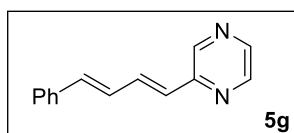

#### 2-((1E,3E)-4-phenylbuta-1,3-dien-1-yl)pyrazine (**5g**)

Compound **5g** (19.1 mg, 91% yield) was obtained as a yellow solid following the *general procedure IV* from **1g** (0.1 mmol, 21 mg) stirred for 4 hours. **<sup>1</sup>H NMR** (400 MHz, CDCl<sub>3</sub>) δ 8.58 (s, 1H), 8.52 (s, 1H), 8.38 (br, 1H), 7.56 (dd, *J*<sub>1</sub> = 15.2 Hz, *J*<sub>2</sub> = 10.8 Hz, 1H), 7.48 (d, *J* = 7.6 Hz, 2H), 7.36 (t, *J* = 7.6 Hz, 2H), 7.29 (d, *J* = 7.2 Hz, 1H), 7.02 (dd, *J*<sub>1</sub> = 15.2 Hz, *J*<sub>2</sub> = 10.8 Hz, 1H), 6.85 (d, *J* = 15.2 Hz, 1H), 6.72 (d, *J* = 15.2 Hz, 1H); **<sup>13</sup>C{<sup>1</sup>H} NMR** (100 MHz, CDCl<sub>3</sub>) δ 151.3, 144.2, 143.6, 142.3, 137.1, 136.6, 135.8, 128.7, 128.4, 127.9, 127.6, 126.8; **IR** (neat) ν 3022, 2923, 2852, 1615, 1449, 1398, 1121, 1056, 1014, 985, 847, 757, 745, 689 cm<sup>-1</sup>; **MP**: 75-77 °C; **HRMS** Calcd. for C<sub>14</sub>H<sub>13</sub>N<sub>2</sub> [M+H]<sup>+</sup>: 209.1079, found: 209.1077.

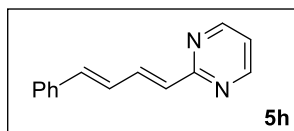

#### 2-((1E,3E)-4-phenylbuta-1,3-dien-1-yl)pyrimidine (**5h**)

Compound **5h** (19.5 mg, 93% yield) was obtained as a yellow solid following the *general procedure IV* from **1h** (0.1 mmol, 21 mg) stirred for 4 hours. **<sup>1</sup>H NMR** (400

MHz, CDCl<sub>3</sub>)  $\delta$  8.69 (d,  $J$  = 4.4 Hz, 2H), 7.78 (dd,  $J_1$  = 15.2 Hz,  $J_2$  = 11.2 Hz, 1H), 7.49 (d,  $J$  = 7.6 Hz, 2H), 7.36 (t,  $J$  = 7.6 Hz, 2H), 7.29 (d,  $J$  = 7.6 Hz, 1H), 7.08-7.02 (m, 2H), 6.88 (d,  $J$  = 15.6 Hz, 1H), 6.79 (d,  $J$  = 15.6 Hz, 1H); <sup>13</sup>C{<sup>1</sup>H} NMR (100 MHz, CDCl<sub>3</sub>)  $\delta$  164.8, 157.0, 138.7, 137.7, 136.7, 130.9, 128.7, 128.4, 127.9, 126.9, 118.3; IR (neat)  $\nu$  3028, 2923, 2852, 1621, 1564, 1547, 1415, 999, 844, 748, 692 cm<sup>-1</sup>; MP: 93-94 °C; HRMS Calcd. for C<sub>14</sub>H<sub>13</sub>N<sub>2</sub> [M+H]<sup>+</sup>: 209.1079, found: 209.1077.

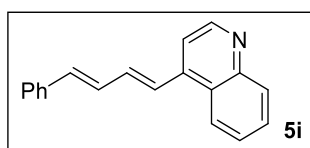

#### 4-((1E,3E)-4-phenylbuta-1,3-dien-1-yl)quinoline (**5i**)

This is a known compound.<sup>3d</sup> Compound **5i** (25.0 mg, 96% yield) was obtained as a yellow solid following the *general procedure IV* from **1i** (0.1 mmol, 26 mg) stirred for 4 hours. <sup>1</sup>H NMR (400 MHz, CDCl<sub>3</sub>)  $\delta$  8.87 (d,  $J$  = 4.8 Hz, 1H), 8.18 (t,  $J$  = 9.2 Hz, 2H), 7.75 (t,  $J$  = 7.6 Hz, 1H), 7.63-7.58 (m, 2H), 7.51 (d,  $J$  = 7.6 Hz, 2H), 7.42-7.36 (m, 3H), 7.31 (d,  $J$  = 7.6 Hz, 1H), 7.27-7.21 (m, 1H), 7.12 (dd,  $J_1$  = 15.2 Hz,  $J_2$  = 10.4 Hz, 1H), 6.86 (d,  $J$  = 15.2 Hz, 1H).

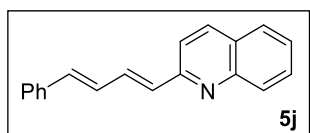

#### 2-((1E,3E)-4-phenylbuta-1,3-dien-1-yl)quinoline (**5j**)

This is a known compound.<sup>3e</sup> Compound **5j** (24.2 mg, 93% yield) was obtained as a yellow solid following the *general procedure IV* from **1j** (0.1 mmol, 26 mg) stirred for 4 hours. <sup>1</sup>H NMR (400 MHz, CDCl<sub>3</sub>)  $\delta$  8.08 (t,  $J$  = 8.4 Hz, 2H), 7.77 (d,  $J$  = 8.4 Hz, 1H), 7.70 (t,  $J$  = 8.0 Hz, 1H), 7.59-7.47 (m, 5H), 7.37 (t,  $J$  = 7.6 Hz, 2H), 7.29 (d,  $J$  = 7.2 Hz, 1H), 7.07 (dd,  $J_1$  = 15.6 Hz,  $J_2$  = 10.8 Hz, 1H), 6.96 (d,  $J$  = 15.6 Hz, 1H), 6.87 (d,  $J$  = 15.6 Hz, 1H).

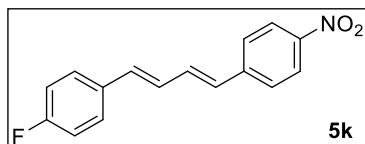

**1-fluoro-4-((1E,3E)-4-(4-nitrophenyl)buta-1,3-dien-1-yl)benzene (5k)**

Compound **5k** (26.7 mg, 99% yield) was obtained as a yellow solid following the *general procedure IV* from **1k** (0.1 mmol, 27 mg) stirred for 4 hours. **<sup>1</sup>H NMR** (400 MHz, CDCl<sub>3</sub>) δ 8.19 (d, *J* = 8.4 Hz, 2H), 7.54 (d, *J* = 8.4 Hz, 2H), 7.44 (dd, *J*<sub>1</sub> = 8.4 Hz, *J*<sub>2</sub> = 5.6 Hz, 2H), 7.12-7.03 (m, 3H), 6.89 (dd, *J*<sub>1</sub> = 15.6 Hz, *J*<sub>2</sub> = 10.4 Hz, 1H), 6.76 (d, *J* = 15.6 Hz, 1H), 6.69 (d, *J* = 15.6 Hz, 1H); **<sup>13</sup>C{<sup>1</sup>H} NMR** (100 MHz, CDCl<sub>3</sub>) δ 162.7 (d, *J* = 247.4 Hz), 146.6, 143.8, 134.7, 133.5, 132.9 (d, *J* = 3.5 Hz), 130.1, 128.3 (d, *J* = 8.0 Hz), 128.0 (d, *J* = 2.7 Hz), 126.6, 124.1, 115.8 (d, *J* = 21.7 Hz); **<sup>19</sup>F NMR** (376 MHz, CDCl<sub>3</sub>) -112.55 to -112.63 (m); **IR** (neat) ν 2954, 2923, 2850, 1584, 1505, 1457, 1336, 1155, 1107, 988, 858, 805, 745 cm<sup>-1</sup>; **HRMS** Calcd. for C<sub>16</sub>H<sub>12</sub>FNO<sub>2</sub> [*M*]<sup>+</sup>: 269.0852, found: 269.0849.

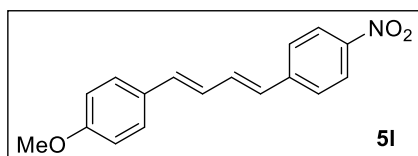

**1-Methoxy-4-((1E,3E)-4-(4-nitrophenyl)buta-1,3-dien-1-yl)benzene (5l)**

This is a known compound.<sup>3f</sup> Compound **5l** (25.8 mg, 92% yield) was obtained as a yellow solid following the *general procedure IV* from **1l** (0.1 mmol, 28 mg) stirred for 4 hours. **<sup>1</sup>H NMR** (400 MHz, CDCl<sub>3</sub>) δ 8.18 (d, *J* = 8.4 Hz, 2H), 7.52 (d, *J* = 8.4 Hz, 2H), 7.41 (d, *J* = 8.3 Hz, 2H), 7.09 (dd, *J*<sub>1</sub> = 15.6 Hz, *J*<sub>2</sub> = 10.2 Hz, 1H), 6.91-6.82 (m, 3H), 6.75 (d, *J* = 15.2 Hz, 1H), 6.64 (d, *J* = 15.6 Hz, 1H), 3.84 (s, 3H).

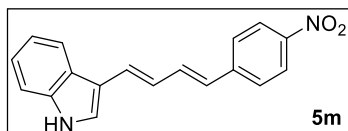

**3-((1E,3E)-4-(4-nitrophenyl)buta-1,3-dien-1-yl)-1H-indole (5m)**

Compound **5m** (27.5 mg, 95% yield) was obtained as a yellow solid following the *general procedure IV* from **1m** (0.1 mmol, 29 mg) stirred for 4 hours. **<sup>1</sup>H NMR** (400

MHz, Acetone- $d_6$ )  $\delta$  10.65 (brs, 1H), 8.19 (d,  $J$  = 8.8 Hz, 2H), 7.99 (d,  $J$  = 7.2 Hz, 1H), 7.72 (d,  $J$  = 8.8 Hz, 2H), 7.66 (s, 1H), 7.48 (d,  $J$  = 8.0 Hz, 1H), 7.37 (dd,  $J_1$  = 15.2 Hz,  $J_2$  = 8.4 Hz, 1H), 7.22-7.09 (m, 4H), 6.77 (d,  $J$  = 15.6 Hz, 1H);  $^{13}\text{C}\{^1\text{H}\}$  NMR (100 MHz, Acetone- $d_6$ )  $\delta$  146.7, 146.0, 138.5, 136.9, 131.4, 127.6, 127.2, 127.1, 126.4, 125.4, 124.8, 123.1, 121.1, 120.7, 115.5, 112.8; **IR** (neat)  $\nu$  3386, 2917, 2850, 1581, 1505, 1454, 1333, 1107, 980, 742  $\text{cm}^{-1}$ ; **MP**: 188-189  $^\circ\text{C}$ ; **HRMS** Calcd. for  $\text{C}_{18}\text{H}_{13}\text{N}_2\text{O}_2$  [ $\text{M}-\text{H}$ ] $^-$ : 289.0977, found: 289.0975.

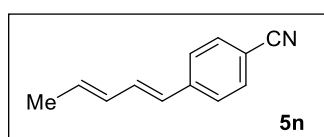

#### 4-((1E,3E)-penta-1,3-dien-1-yl)benzonitrile (**5n**)

Compound **5n** (10.7 mg, 63% yield, 5:1 *E/Z*) was obtained as a yellow solid following the *general procedure IV* from **1n** (0.1 mmol, 20 mg) stirred for 4 hours.  $^1\text{H}$  NMR (400 MHz,  $\text{CDCl}_3$ )  $\delta$  7.60-7.56 (m, 2H), 7.43 (d,  $J$  = 8.0 Hz, 2H), 6.84 (dd,  $J_1$  = 15.6 Hz,  $J_2$  = 10.4 Hz, 1H), 6.40 (d,  $J$  = 16.0 Hz, 1H), 6.27-6.17 (m, 1H), 6.0-5.91 (m, 1H), 1.85 (d,  $J$  = 7.2 Hz, 3H);  $^{13}\text{C}\{^1\text{H}\}$  NMR (100 MHz,  $\text{CDCl}_3$ , major product)  $\delta$  142.2, 133.5, 133.0, 132.4, 131.3, 127.7, 126.4, 119.2, 109.9, 18.5; **IR** (neat)  $\nu$  2974, 2926, 2228, 1683, 1604, 1505, 1273, 1175, 974, 833, 734, 550  $\text{cm}^{-1}$ ; **MP**: 58-60  $^\circ\text{C}$ ; **HRMS** Calcd. for  $\text{C}_{12}\text{H}_{12}\text{N}$  [ $\text{M}+\text{H}$ ] $^+$ : 170.0970, found: 170.0965.

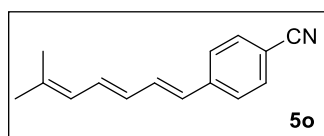

#### 4-((1E,3E)-6-methylhepta-1,3,5-trien-1-yl)benzonitrile (**5o**)

Compound **5o** (5.0 mg, 24% yield, 5:1 *E/Z*) was obtained as a yellow solid following the *general procedure IV* from **1o** (0.1 mmol, 21 mg) stirred for 4 hours.  $^1\text{H}$  NMR (400 MHz,  $\text{CDCl}_3$ )  $\delta$  7.56 (d,  $J$  = 8.4 Hz, 2H), 7.44 (d,  $J$  = 8.4 Hz, 2H), 6.96 (dd,  $J_1$  = 15.6 Hz,  $J_2$  = 11.2 Hz, 1H), 6.65 (dd,  $J_1$  = 15.2 Hz,  $J_2$  = 11.2 Hz, 1H), 6.47 (d,  $J$  = 15.6 Hz, 1H), 6.28 (dd,  $J_1$  = 15.2 Hz,  $J_2$  = 10.8 Hz, 1H), 5.96 (d,  $J$  = 11.2 Hz, 1H), 1.85 (s, 3H),

1.84 (s, 3H);  $^{13}\text{C}\{^1\text{H}\}$  NMR (100 MHz,  $\text{CDCl}_3$ )  $\delta$  142.2, 139.1, 133.4, 132.8, 132.5, 132.4, 129.4, 128.6, 126.9, 126.4, 125.4, 119.2, 109.7, 26.4, 18.6; IR (neat)  $\nu$  2974, 2920, 2225, 1717, 1604, 1505, 1268, 1107, 994, 838, 737  $\text{cm}^{-1}$ ; HRMS Calcd. for  $\text{C}_{15}\text{H}_{16}\text{N}$   $[\text{M}+\text{H}]^+$ : 210.1283, found: 210.1279.

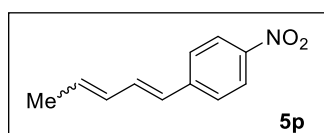

#### 1-nitro-4-((1E,3E)-penta-1,3-dien-1-yl)benzene (**5p**)

This is a known compound.<sup>3g</sup> Compound **5p** (17.8 mg, 94% yield, 8:1 *E/Z*) was obtained as a yellowish solid following the *general procedure IV* from **1p** (0.1 mmol, 19 mg) stirred for 4 hours.  $^1\text{H}$  NMR (400 MHz,  $\text{CDCl}_3$ )  $\delta$  8.18-8.13 (m, 2H), 7.53-7.46 (m, 2H), 6.89 (dd,  $J_1 = 15.6$  Hz,  $J_2 = 10.8$  Hz, 1H), 6.45 (d,  $J = 15.6$  Hz, 1H), 6.28-6.22 (m, 1H), 6.03-5.94 (m, 1H), 1.87-1.85 (m, 3H).

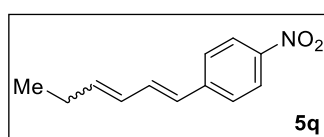

#### 1-((1E,3E)-hexa-1,3-dien-1-yl)-4-nitrobenzene (**5q**)

Compound **5q** (19.8 mg, 99% yield, 11:1 *E/Z*) was obtained as a yellow solid following the *general procedure IV* from **1q** (0.1 mmol, 20 mg) stirred for 4 hours.  $^1\text{H}$  NMR (400 MHz,  $\text{CDCl}_3$ )  $\delta$  8.18-8.14 (m, 2H), 7.53-7.46 (m, 2H), 6.91 (dd,  $J_1 = 15.6$  Hz,  $J_2 = 10.4$  Hz, 1H), 6.47 (d,  $J = 15.6$  Hz, 1H), 6.24 (dd,  $J_1 = 15.6$  Hz,  $J_2 = 10.4$  Hz, 1H), 6.03 (dt,  $J_1 = 15.6$  Hz,  $J_2 = 6.8$  Hz, 1H), 2.24-2.17 (m, 2H), 1.07 (t,  $J = 7.6$  Hz, 3H);  $^{13}\text{C}\{^1\text{H}\}$  NMR (100 MHz,  $\text{CDCl}_3$ )  $\delta$  146.3, 144.3, 141.2, 134.1, 129.0, 127.5, 126.4, 124.0, 26.0, 13.3; IR (neat)  $\nu$  2965, 2926, 2852, 1590, 1508, 1338, 1110, 985, 844, 748, 683  $\text{cm}^{-1}$ ; MP: 63-65  $^\circ\text{C}$ ; HRMS Calcd. for  $\text{C}_{12}\text{H}_{12}\text{NO}_2$   $[\text{M}-\text{H}]^-$ : 202.0868, found: 202.0869.

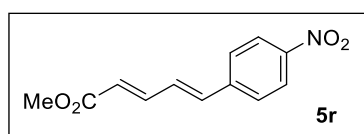

### Methyl (2E,4E)-5-(4-nitrophenyl)penta-2,4-dienoate (**5r**)

This is a known compound.<sup>3h</sup> Compound **5r** (6.7 mg, 30% yield, 10:1 *E/Z*) was obtained as a yellow solid following the *general procedure IV* from **1r** (0.1 mmol, 23 mg) stirred for 4 hours. <sup>1</sup>H NMR (400 MHz, CDCl<sub>3</sub>) δ 8.22 (d, *J* = 8.4 Hz, 2H), 7.60 (d, *J* = 8.4 Hz, 2H), 7.45 (dd, *J*<sub>1</sub> = 15.2 Hz, *J*<sub>2</sub> = 10.4 Hz, 1H), 7.04-6.91 (m, 2H), 6.11 (d, *J* = 15.2 Hz, 1H), 3.79 (s, 3H).

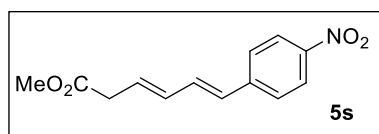

### Methyl (3E,5E)-6-(4-nitrophenyl)hexa-3,5-dienoate (**5s**)

Compound **5s** (23.0 mg, 92% yield) was obtained as a yellow solid following the *general procedure IV* from **1s** (0.1 mmol, 25 mg) stirred for 4 hours. <sup>1</sup>H NMR (400 MHz, CDCl<sub>3</sub>) δ 8.17 (d, *J* = 8.4 Hz, 2H), 7.50 (d, *J* = 8.4 Hz, 2H), 6.92 (dd, *J*<sub>1</sub> = 15.6 Hz, *J*<sub>2</sub> = 10.8 Hz, 1H), 6.54 (d, *J* = 15.6 Hz, 1H), 6.34 (dd, *J*<sub>1</sub> = 15.6 Hz, *J*<sub>2</sub> = 10.8 Hz, 1H), 6.08-6.01 (m, 1H), 3.72 (s, 3H), 3.23 (d, *J* = 7.2 Hz, 2H); <sup>13</sup>C{<sup>1</sup>H} NMR (100 MHz, CDCl<sub>3</sub>) δ 171.5, 146.6, 143.7, 133.2, 132.7, 129.7, 129.0, 126.7, 124.1, 52.0, 37.9; IR (neat) ν 2999, 2954, 1728, 1593, 1514, 1437, 1398, 1338, 1169, 988, 878, 847, 745, 692 cm<sup>-1</sup>; MP: 113-115 °C; HRMS Calcd. for C<sub>13</sub>H<sub>12</sub>NO<sub>4</sub> [M-H]<sup>-</sup>: 246.0766, found: 246.0763.

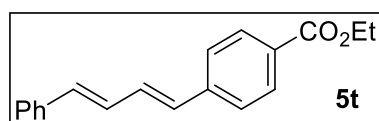

### Ethyl 4-((1E,3E)-4-phenylbuta-1,3-dien-1-yl)benzoate (**5t**)

This is a known compound.<sup>3i</sup> Compound **5t** (19.3 mg, 69% yield) was obtained as a yellow solid following the *general procedure IV* from **1t** (0.1 mmol, 28 mg) stirred at 150 °C for 48 hours. <sup>1</sup>H NMR (400 MHz, CDCl<sub>3</sub>) δ 8.00 (d, *J* = 8.0 Hz, 2H), 7.50-7.45 (m, 4H), 7.35 (t, *J* = 7.2 Hz, 2H), 7.28-7.24 (m, 1H), 7.09-6.94 (m, 2H), 6.74 (d, *J* = 15.2 Hz, 1H), 6.69 (d, *J* = 14.8 Hz, 1H), 4.38 (q, *J* = 7.2 Hz, 2H), 1.40 (t, *J* = 7.2 Hz, 3H).



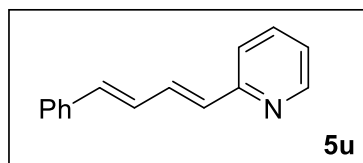

**2-((1E,3E)-4-phenylbuta-1,3-dien-1-yl)pyridine (5u)**

This is a known compound.<sup>3j</sup> Compound **5u** (9.5 mg, 45% yield) was obtained as a yellow solid following the *general procedure IV* from **1g** (0.1 mmol, 21 mg) stirred at 120 °C for 48 hours. <sup>1</sup>H NMR (400 MHz, CDCl<sub>3</sub>) δ 8.58 (d, *J* = 4.4 Hz, 1H), 7.64 (t, *J* = 7.6 Hz, 1H), 7.48-7.41 (m, 3H), 7.37-7.31 (m, 3H), 7.28-7.24 (m, 1H), 7.13-7.01 (m, 1H), 7.01 (dd, *J*<sub>1</sub> = 15.6 Hz, *J*<sub>2</sub> = 10.8 Hz, 1H), 6.80 (d, *J* = 15.6 Hz, 1H), 6.74 (d, *J* = 15.6 Hz, 1H).

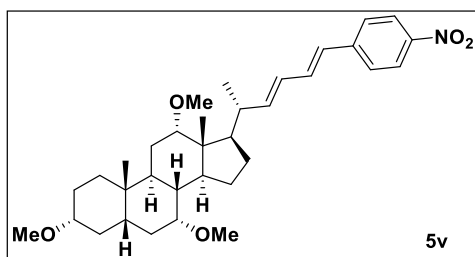

**(3R,5S,7R,8R,9S,10S,12S,13R,14S,17R)-3,7,12-trimethoxy-10,13-dimethyl-17-((R,3E,5E)-6-(4-nitrophenyl)hexa-3,5-dien-2-yl)hexadecahydro-1H-cyclopenta[a]phenanthrene (5v)**

Compound **5v** (50 mg, 91% yield, 17/1 *E/Z*) was obtained as a white solid following the *general procedure IV* from **1v** (0.1 mmol, 55 mg) stirred for 4 hours. <sup>1</sup>H NMR (400 MHz, CDCl<sub>3</sub>) δ 8.15 (d, *J* = 8.8 Hz, 2H), 7.47 (d, *J* = 8.8 Hz, 2H), 6.88 (dd, *J*<sub>1</sub> = 15.6 Hz, *J*<sub>2</sub> = 10.4 Hz, 1H), 6.45 (d, *J* = 15.6 Hz, 1H), 6.16 (dd, *J*<sub>1</sub> = 15.2 Hz, *J*<sub>2</sub> = 10.4 Hz, 1H), 5.87 (dd, *J*<sub>1</sub> = 15.2 Hz, *J*<sub>2</sub> = 8.8 Hz, 1H), 3.37 (s, 1H), 3.33 (s, 3H), 3.29 (s, 3H), 3.20 (s, 3H), 3.13 (d, *J* = 2.4 Hz, 1H), 3.03-2.97 (m, 1H), 2.23-2.04 (m, 5H), 1.86-1.67 (m, 6H), 1.57-1.42 (m, 2H), 1.35-1.14 (m, 7H), 1.07 (d, *J* = 6.4 Hz, 3H), 0.90 (s, 3H), 0.70 (s, 3H); <sup>13</sup>C{<sup>1</sup>H} NMR (100 MHz, CDCl<sub>3</sub>) δ 146.4, 146.2, 144.5, 134.6, 127.4, 127.3, 126.3, 124.0, 81.9, 80.7, 55.84, 55.77, 55.4, 46.24, 46.19, 42.6, 41.9, 40.3, 39.6, 35.2, 34.9, 34.4, 27.9, 27.8, 27.7, 26.7, 23.2, 22.8, 22.0, 19.4, 12.7; IR (neat) ν 2927, 2867, 2819, 1590, 1515, 1451, 1367, 1338, 1177, 1101, 985, 855, 737 cm<sup>-1</sup>; MP: 87-88

°C; **HRMS** Calcd. for  $C_{34}H_{50}NO_5$   $[M+H]^+$ : 552.3689, found: 552.3688.

### General procedure for the gram-scale reaction

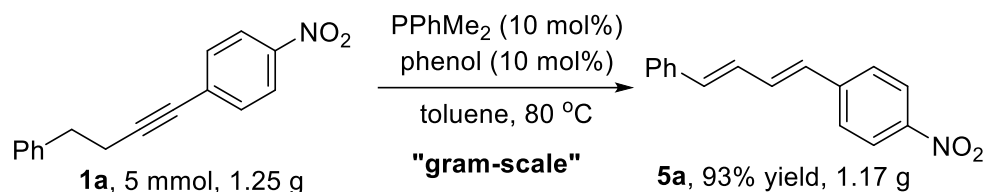

Enlarging the reaction scale up to 5.0 mmol, the compound **5a** was obtained in 93% yield (1.17 g) following the *general procedure IV* from **1a** (5.0 mmol, 1.25 g).

### Preparation of allene 6

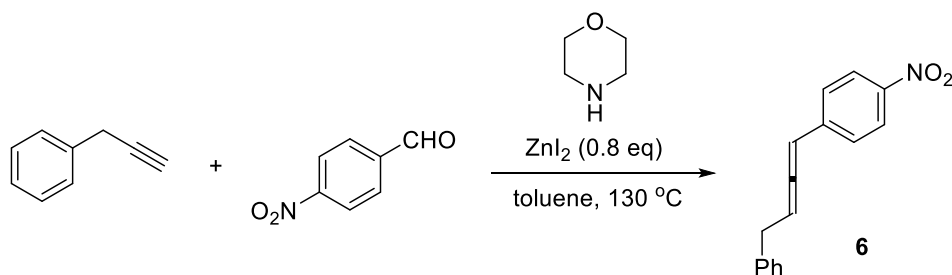

To a dried reaction tube was added  $ZnI_2$  (2.4 mmol). Then the reaction tube was dried under vacuum with a heating gun. Then aldehyde (5.4 mmol), alkyne (3.0 mmol), morpholine (4.2 mmol) and toluene (30 mL) were added sequentially into this dried reaction tube equipped with a reflux condenser under a nitrogen atmosphere and the resulting mixture was stirred at 130 °C overnight. When the reaction was complete as monitored by TLC, the reaction mixture was cooled to room temperature and then filtered. Evaporation and column chromatography on silica gel (PE/Et<sub>2</sub>O = 50/1) afforded the corresponding allene as a yellowish syrupy oil (150 mg, 20% yield).

**<sup>1</sup>H NMR** (400 MHz, CDCl<sub>3</sub>)  $\delta$  8.17-8.12 (m, 2H), 7.41-7.25 (m, 7H), 6.26 (dt,  $J_1 = 7.2$  Hz,  $J_2 = 2.8$  Hz, 1H), 5.90 (q,  $J = 7.2$  Hz, 1H), 3.54 (dd,  $J_1 = 7.2$  Hz,  $J_2 = 2.8$  Hz, 2H); **<sup>13</sup>C{<sup>1</sup>H} NMR** (100 MHz, CDCl<sub>3</sub>)  $\delta$  207.5, 146.3, 141.9, 139.2, 128.5, 128.3, 126.9, 126.5, 123.8, 95.5, 94.0, 34.9; **IR** (neat)  $\nu$  2963, 2926, 2847, 1595, 1514, 1451, 1344, 1259, 1104, 1014, 802, 734, 700 cm<sup>-1</sup>; **HRMS** Calcd. for  $C_{16}H_{12}NO_2$   $[M-H]^-$ : 250.0868, found: 250.0869.

## Hetero-D-A preparation of 7-8

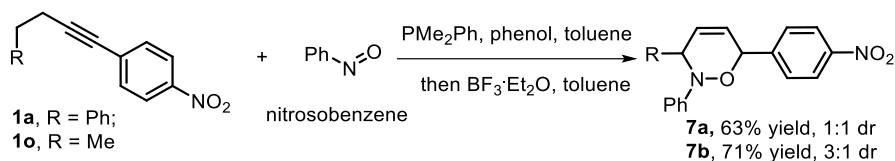

To an oven dried vial was charged with **1a** or **1o** (0.1 mmol), phenol (0.01 mmol) and  $\text{PMe}_2\text{Ph}$  (0.01 mmol) in toluene (1.0 mmol). The mixture was heated at 80 °C under  $\text{N}_2$  protection for 12 hours. TLC detected until all the starting material disappear. Then the reaction mixture cooled to room temperature, nitrosobenzene (0.11 mmol) and  $\text{BF}_3\cdot\text{Et}_2\text{O}$  (0.02 mmol) added sequentially. The mixture was heated at 80 °C under  $\text{N}_2$  protection for 2 hours. Cooled the reaction to room temperature and purification by column chromatography (PE/EA = 20/1) to give the cycloaddition product **7a-7b** as a yellowish oil (for **7a**, 22.6 mg, 63% yield, 1:1 dr; for **7b**, 21 mg, 71% yield, 3:1 dr).

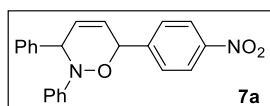

Compound **7a** was obtained as a syrup yellow oil (22.6 mg, 63% yield, 1:1 dr);  $^1\text{H}$  NMR (400 MHz,  $\text{CDCl}_3$ )  $\delta$  8.29 (d,  $J$  = 8.8 Hz, 2H), 8.08 (d,  $J$  = 8.4 Hz, 2H), 7.70 (d,  $J$  = 8.4 Hz, 2H), 7.54 (d,  $J$  = 8.4 Hz, 2H), 7.48-7.40 (m, 5H), 7.26-7.16 (m, 9H), 6.98-6.87 (m, 6H), 6.27-6.15 (m, 4H), 5.72 (s, 1H), 5.68 (s, 1H), 5.28 (s, 1H), 5.15 (s, 1H);  $^{13}\text{C}\{^1\text{H}\}$  NMR (100 MHz,  $\text{CDCl}_3$ )  $\delta$  148.1, 147.8, 147.7, 146.2, 145.8, 137.9, 137.6, 129.62, 129.58, 129.3, 128.83, 128.78, 128.5, 128.3, 128.0, 127.8, 126.6, 126.5, 123.8, 123.3, 123.0, 122.3, 118.1, 116.5, 79.2, 77.9, 64.3, 62.6; IR (neat)  $\nu$  3059, 3030, 2923, 2852, 1598, 1519, 1491, 1451, 1347, 1110, 1033, 946, 853, 830, 754, 697  $\text{cm}^{-1}$ ; HRMS Calcd. for  $\text{C}_{22}\text{H}_{19}\text{N}_2\text{O}_3$   $[\text{M}+\text{H}]^+$ : 359.1396, found: 359.1397.

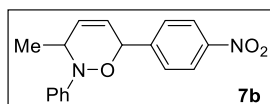

Compound **7b** was obtained as a light yellow oil (21 mg, 71% yield, 3:1 dr);  $^1\text{H}$  NMR (400 MHz,  $\text{CDCl}_3$ , major product)  $\delta$  8.26 (d,  $J$  = 8.8 Hz, 2H), 7.63-7.60 (m, 2H), 7.33-7.26 (m, 2H), 7.08-7.05 (m, 2H), 7.01-6.98 (m, 1H), 6.20-6.15 (m, 1H), 5.91-5.89 (dd,

$J_1 = 10.0$  Hz,  $J_2 = 1.4$  Hz, 1H), 5.64 (s, 1H), 4.28-4.22 (m, 1H), 1.22 (d,  $J = 6.4$  Hz, 3H);  $^{13}\text{C}\{^1\text{H}\}$  NMR (100 MHz,  $\text{CDCl}_3$ )  $\delta$  148.3, 147.8, 146.0, 131.4, 130.9, 128.9, 128.8, 128.5, 128.4, 126.9, 125.5, 123.8, 123.4, 122.2, 116.6, 78.6, 78.1 (minor), 55.7 (minor), 55.0, 14.9; **IR** (neat)  $\nu$  2971, 2926, 2850, 1595, 1516, 1491, 1449, 1344, 1256, 1180, 1064, 1036, 799, 751, 692  $\text{cm}^{-1}$ ; **HRMS** Calcd. for  $\text{C}_{17}\text{H}_{15}\text{N}_2\text{O}_3$   $[\text{M}-\text{H}]^-$ : 295.1083, found: 295.1085;

### **General procedure for the Hetero-D-A reaction to prepare 8**

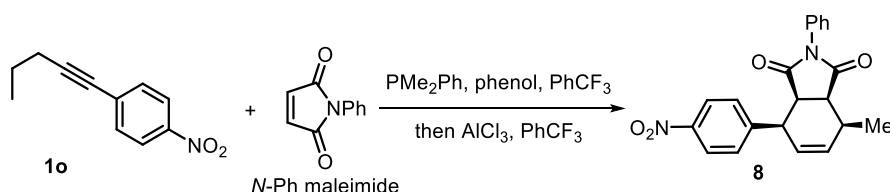

To an oven dried vial was charged with **1o** (0.1 mmol), phenol (0.01 mmol) and  $\text{PMe}_2\text{Ph}$  (0.01 mmol) in benzotrifluoride (1.0 mmol) under  $\text{N}_2$  protection. The mixture was heated at 120 °C under  $\text{N}_2$  protection for 12 hours. TLC detected until all the starting material disappear, then cooled the reaction to room temperature and added  $\text{AlCl}_3$  (0.02 mmol) and *N*-Ph maleimide (0.1 mmol) sequentially, heated the reaction mixture at 150 °C overnight. Quenched the reaction with water and extracted by ethyl acetate. Dried the organic solution with  $\text{Na}_2\text{SO}_4$  and purification by column chromatography (PE/EA = 6/1) to give the Diels-Alder annulation product **8** as a yellowish solid (31.3 mg, 87% yield, >20:1 dr).

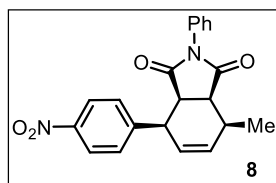

Compound **8** was obtained as a yellowish solid (31.3 mg, 87% yield, >20:1 dr);  $^1\text{H}$  NMR (400 MHz,  $\text{CDCl}_3$ )  $\delta$  8.21 (d,  $J = 8.8$  Hz, 2H), 7.52 (d,  $J = 8.8$  Hz, 2H), 7.43-7.32 (m, 3H), 7.13 (d,  $J = 7.2$  Hz, 2H), 6.35 (dt,  $J_1 = 9.2$  Hz,  $J_2 = 3.6$  Hz, 1H), 6.06 (dt,  $J_1 = 9.2$  Hz,  $J_2 = 3.6$  Hz, 1H), 3.81-3.80 (m, 1H), 3.59 (dd,  $J_1 = 8.4$  Hz,  $J_2 = 6.4$  Hz, 1H), 3.34 (dd,  $J_1 = 8.4$  Hz,  $J_2 = 6.8$  Hz, 1H), 2.74-2.70 (m, 1H), 1.60 (d,  $J = 7.2$  Hz, 3H);

**$^{13}\text{C}\{^1\text{H}\}$  NMR** (100 MHz,  $\text{CDCl}_3$ )  $\delta$  175.6, 175.1, 147.0, 146.9, 136.3, 131.5, 129.7, 129.1, 128.7, 128.6, 126.3, 123.4, 47.1, 44.8, 41.4, 31.7, 16.8; **MP:** 76-77 °C; **IR** (neat)  $\nu$  2920, 2847, 1708, 1652, 1598, 1517, 1498, 1382, 1346, 1186, 833, 752, 692  $\text{cm}^{-1}$ ; **HRMS** Calcd. for  $\text{C}_{21}\text{H}_{17}\text{N}_2\text{O}_4$   $[\text{M}-\text{H}]^-$ : 361.1188, found: 361.1192.

#### 4. Asymmetric version

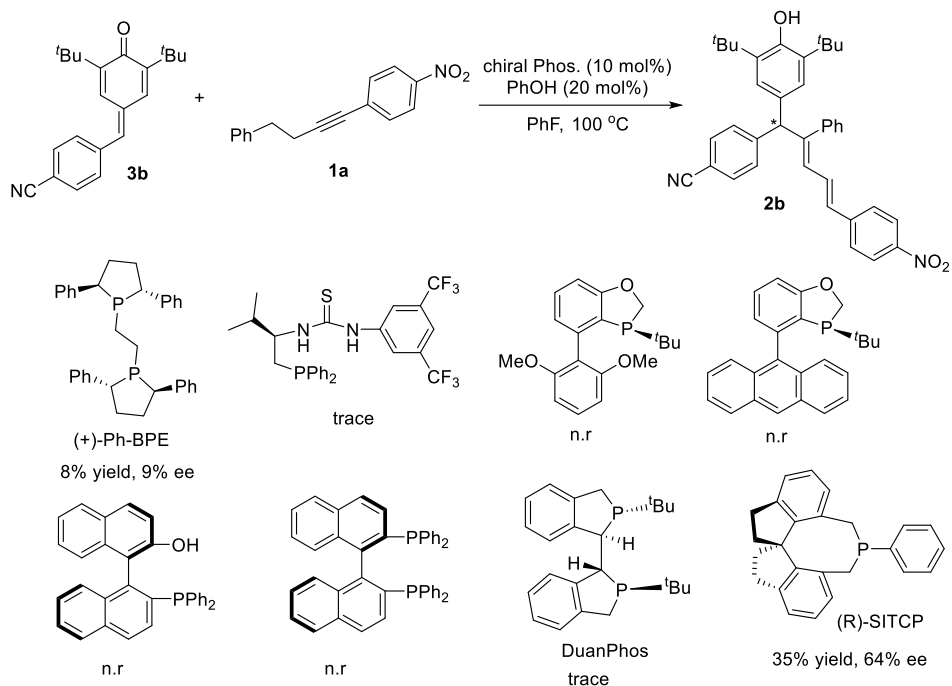

Compound **2b**  $[\alpha]_D^{20} = -6.86$  (c 0.23, CHCl<sub>3</sub>) for 64% ee; Enantiomeric excess was determined by HPLC with a Chiralcel IB-H column, Hexane/*i*PrOH = 95/5, 0.5 mL/min, 230 nm,  $t_{minor} = 21.283$  min,  $t_{major} = 22.774$  min.

#### Racemic Sample of 2b

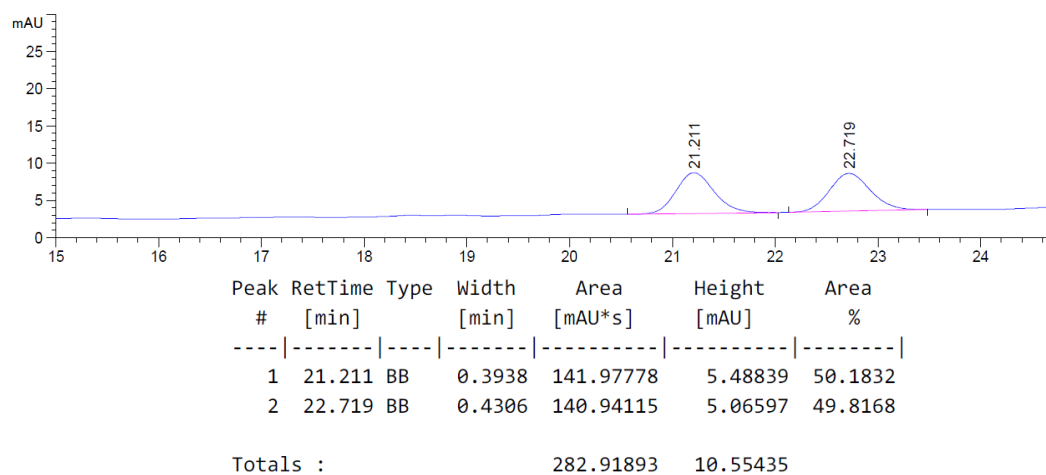

#### Enantiomeric Sample of 2b

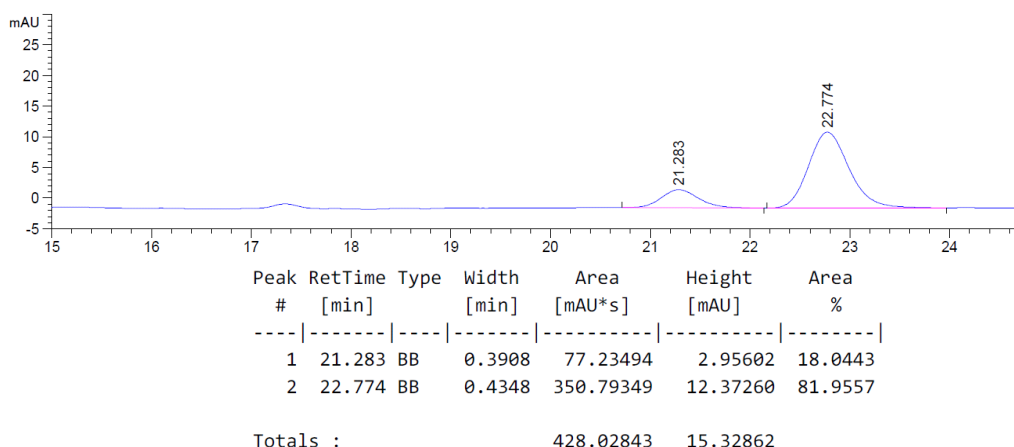

## 5. References

- [1] (a) C. Dal Zotto, J. Wehbe, D. Virieux, J.-M. Campagne, *Synlett* **2008**, 2033; (b) A. J. Warner, J. R. Lawson, V. Fasano, M. J. Ingleson, *Angew. Chem., Int. Ed.* **2015**, 54, 11245; (c) Y. Liu, M. Liu, Z. Song, *J. Am. Chem. Soc.* **2005**, 127, 3662; (d) E. A. Reddy, D. K. Barange, A. Islam, K. Mukkanti, M. Pal, *Tetrahedron* **2008**, 64, 7143; (e) G. Hamasaka, Y. Uozumi, *Chem. Commun.* **2014**, 50, 14516; (f) F. Maesing, H. Nuesse, J. Klingauf, A. Studer, *Org. Lett.* **2017**, 19, 2658; (g) X. Wang, A. Studer, *Org. Lett.* **2017**, 19, 2977.
- [2] W.-D. Chu, L.-F. Zhang, X. Bao, X.-H. Zhao, C. Zeng, J.-Y. Du, G.-B. Zhang, F.-X. Wang, X.-Y. Ma, C.-A. Fan, *Angew. Chem., Int. Ed.* **2013**, 52, 9229.
- [3] (a) S. Cicco, C. Martinelli, V. Pinto, F. Naso, G. M. Farinola, *J. Organomet. Chem.* **2013**, 732, 15; (b) D. Hadrich, F. Berthold, E. Steckhan, H. Bonisch, *J. Med. Chem.* **1999**, 42, 3101; (c) S. Yamada, Y. Azuma, K. Aya, *Tetrahedron Lett.* **2014**, 55, 2801; (d) J. L. Gage, H. A. Kirst, D. O'Neil, B. A. David, C. K. Smith, S. A. Naylor, *Bioorg. Med. Chem.* **2003**, 11, 4083; (e) G. E. M. Crisenza, E. M. Dauncey, J. F. Bower, *Org. Bio. Chem.* **2016**, 14, 5820; (f) S. Khan, S. Roy, A. Ghatak, A. Pramanik, S. Bhar, *Tetrahedron Lett.* **2014**, 55, 5019; (g) T. Mitsudo, W. Fischetti, R. F. Heck, *J. Org. Chem.* **1984**, 49, 1640; (h) R. Lekkala, R. Lekkala, B. Moku, H.-L. Qin, *Org. Chem. Front.* **2019**, 6, 796; (i) K. Itami, T. Nokami, J.-I. Yoshida, *J. Am. Chem. Soc.* **2001**, 123, 5600; (j) Q.-Q. Li, Z. Shah, J.-P. Qu, Y.-B. Kang, *J. Org. Chem.* **2018**, 83, 296;
- [4] H. Behera, N. Madhavan, *J. Am. Chem. Soc.* **2017**, 139, 12919.

## 6. X-ray data of compound 2n and 5d

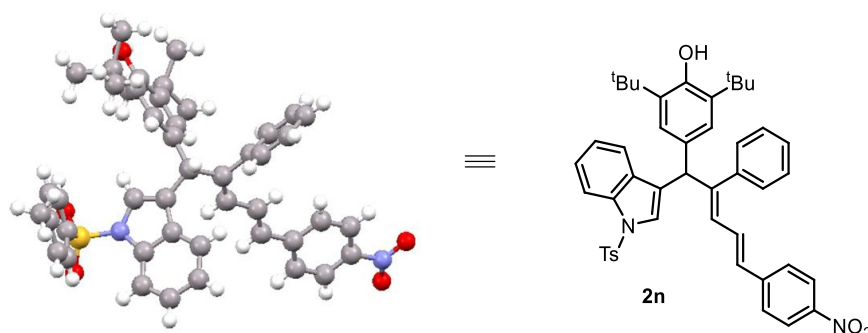

### Crystal data and structure refinement for compound 2n.

|                                             |                                                                 |
|---------------------------------------------|-----------------------------------------------------------------|
| Identification code                         | 190309b                                                         |
| Empirical formula                           | C <sub>46</sub> H <sub>46</sub> N <sub>2</sub> O <sub>5</sub> S |
| Formula weight                              | 738.91                                                          |
| Temperature/K                               | 293(2)                                                          |
| Crystal system                              | orthorhombic                                                    |
| Space group                                 | Pbca                                                            |
| a/Å                                         | 21.3754(10)                                                     |
| b/Å                                         | 15.8343(7)                                                      |
| c/Å                                         | 24.1944(9)                                                      |
| $\alpha$ /°                                 | 90.00                                                           |
| $\beta$ /°                                  | 90.00                                                           |
| $\gamma$ /°                                 | 90.00                                                           |
| Volume/Å <sup>3</sup>                       | 8188.9(6)                                                       |
| Z                                           | 8                                                               |
| $\rho_{\text{calc}}/\text{cm}^3$            | 1.199                                                           |
| $\mu/\text{mm}^{-1}$                        | 1.075                                                           |
| F(000)                                      | 3136.0                                                          |
| Crystal size/mm <sup>3</sup>                | 0.35 × 0.18 × 0.11                                              |
| Radiation                                   | CuK $\alpha$ ( $\lambda$ = 1.54178)                             |
| 2 $\Theta$ range for data collection/°      | 7.3 to 132.1                                                    |
| Index ranges                                | -25 ≤ h ≤ 24, -18 ≤ k ≤ 17, -21 ≤ l ≤ 28                        |
| Reflections collected                       | 18738                                                           |
| Independent reflections                     | 7144 [R <sub>int</sub> = 0.0520, R <sub>sigma</sub> = N/A]      |
| Data/restraints/parameters                  | 7144/0/495                                                      |
| Goodness-of-fit on F <sup>2</sup>           | 1.027                                                           |
| Final R indexes [I ≥ 2 $\sigma$ (I)]        | R <sub>1</sub> = 0.0586, wR <sub>2</sub> = 0.1184               |
| Final R indexes [all data]                  | R <sub>1</sub> = 0.1266, wR <sub>2</sub> = 0.1498               |
| Largest diff. peak/hole / e Å <sup>-3</sup> | 0.21/-0.20                                                      |



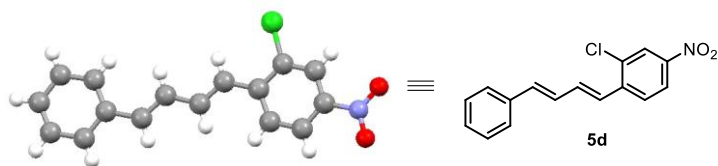

### Crystal data and structure refinement for 5d.

|                                             |                                                               |
|---------------------------------------------|---------------------------------------------------------------|
| Identification code                         | 200731d                                                       |
| Empirical formula                           | C <sub>16</sub> H <sub>12</sub> ClNO <sub>2</sub>             |
| Formula weight                              | 285.72                                                        |
| Temperature/K                               | 293(2)                                                        |
| Crystal system                              | orthorhombic                                                  |
| Space group                                 | Fdd2                                                          |
| a/Å                                         | 24.528(2)                                                     |
| b/Å                                         | 32.202(3)                                                     |
| c/Å                                         | 7.0287(7)                                                     |
| $\alpha$ /°                                 | 90.00                                                         |
| $\beta$ /°                                  | 90.00                                                         |
| $\gamma$ /°                                 | 90.00                                                         |
| Volume/Å <sup>3</sup>                       | 5551.6(9)                                                     |
| Z                                           | 16                                                            |
| $\rho_{\text{calc}}$ /cm <sup>3</sup>       | 1.367                                                         |
| $\mu$ /mm <sup>-1</sup>                     | 0.275                                                         |
| F(000)                                      | 2368.0                                                        |
| Crystal size/mm <sup>3</sup>                | 0.25 × 0.14 × 0.11                                            |
| Radiation                                   | MoK $\alpha$ ( $\lambda$ = 0.71073)                           |
| 2 $\Theta$ range for data collection/°      | 5.06 to 50.04                                                 |
| Index ranges                                | -25 ≤ h ≤ 28, -36 ≤ k ≤ 38, -8 ≤ l ≤ 8                        |
| Reflections collected                       | 6890                                                          |
| Independent reflections                     | 2437 [R <sub>int</sub> = 0.0565, R <sub>sigma</sub> = 0.1017] |
| Data/restraints/parameters                  | 2437/1/181                                                    |
| Goodness-of-fit on F <sup>2</sup>           | 1.038                                                         |
| Final R indexes [I ≥ 2 $\sigma$ (I)]        | R <sub>1</sub> = 0.0644, wR <sub>2</sub> = 0.1674             |
| Final R indexes [all data]                  | R <sub>1</sub> = 0.1253, wR <sub>2</sub> = 0.1973             |
| Largest diff. peak/hole / e Å <sup>-3</sup> | 0.23/-0.24                                                    |
| Flack parameter                             | 0.6(2)                                                        |

## 7. NMR Spectra data

### NMR spectra of compound 1

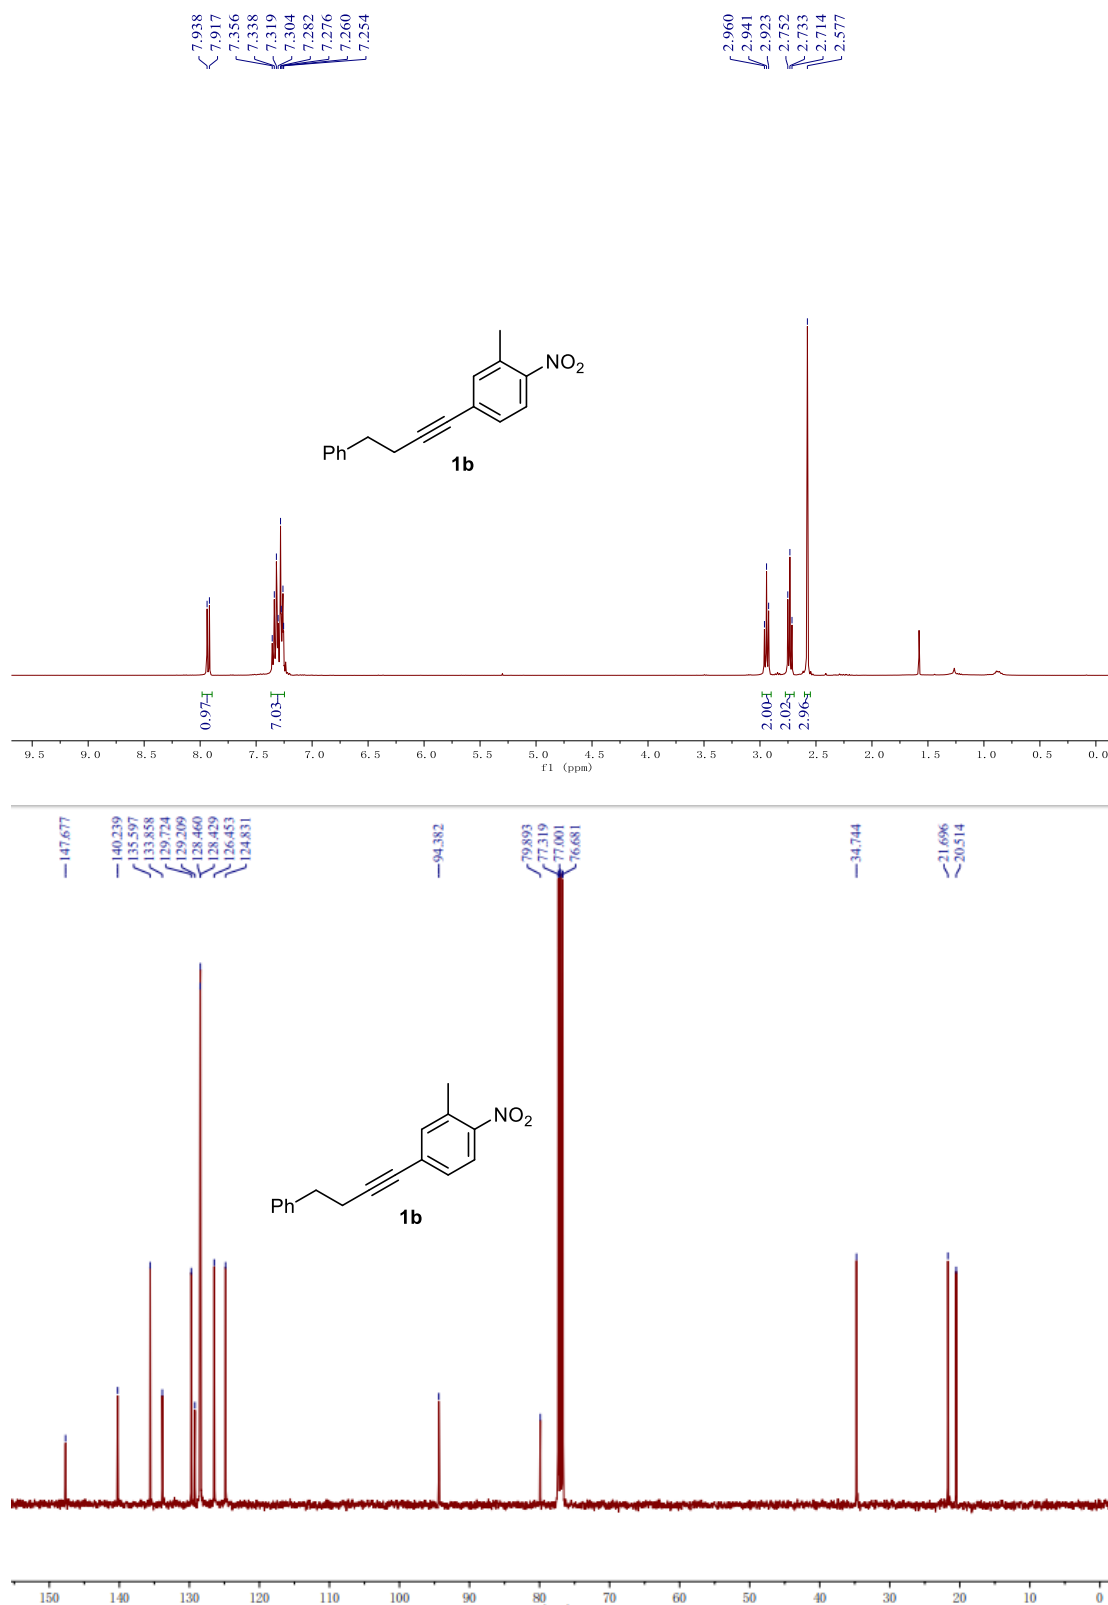

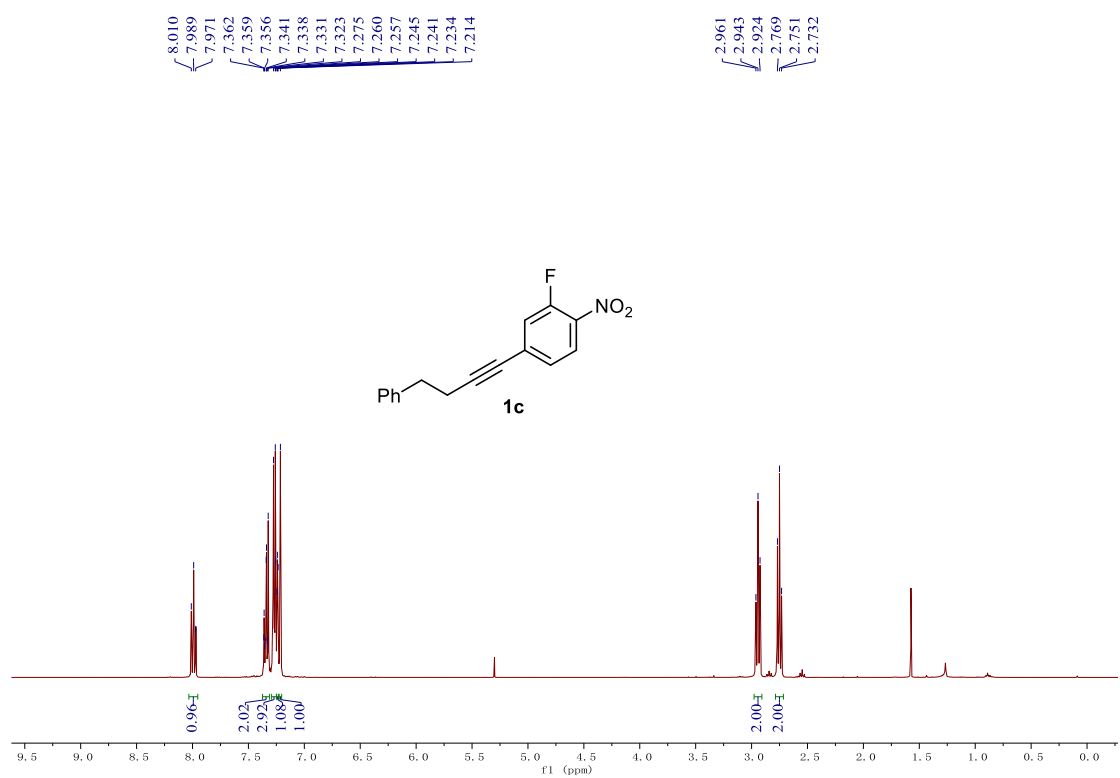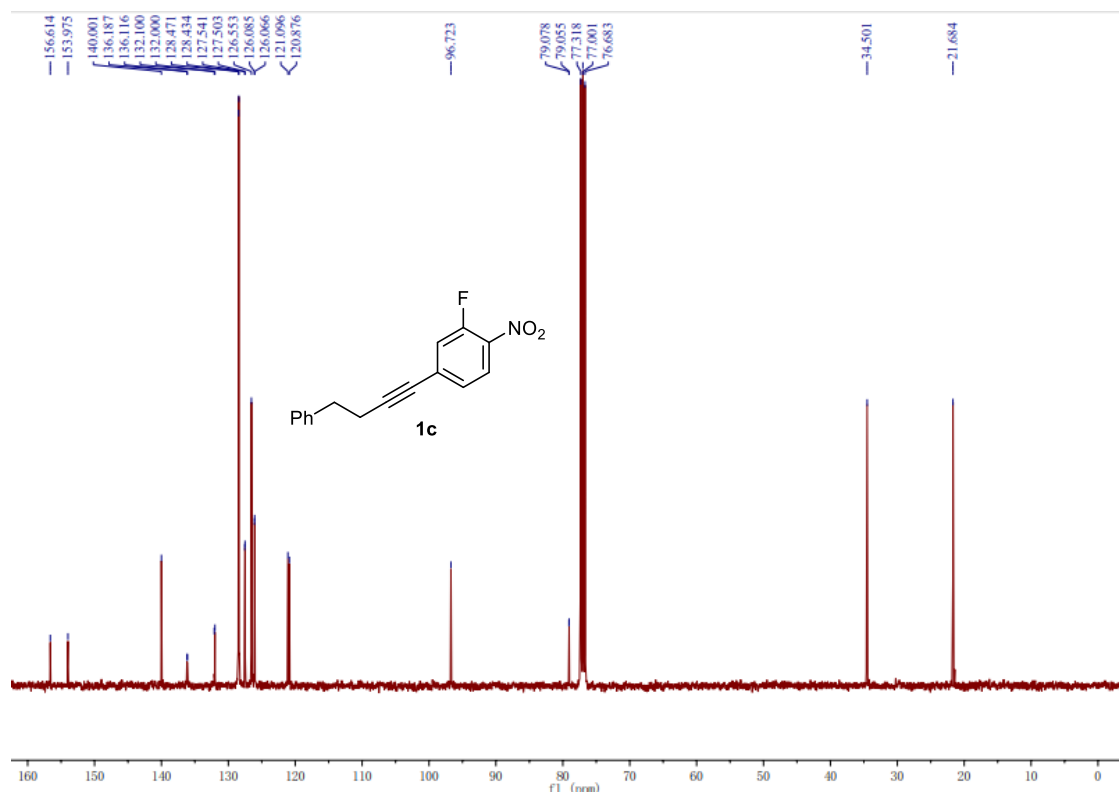

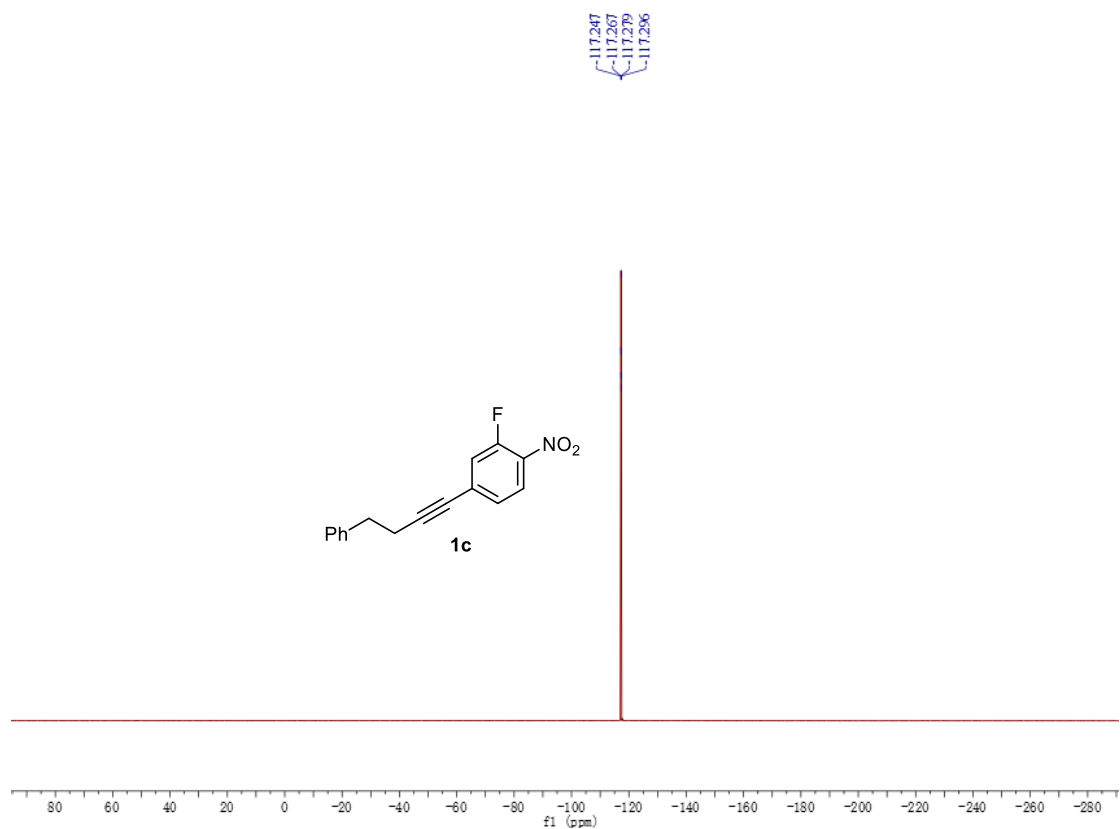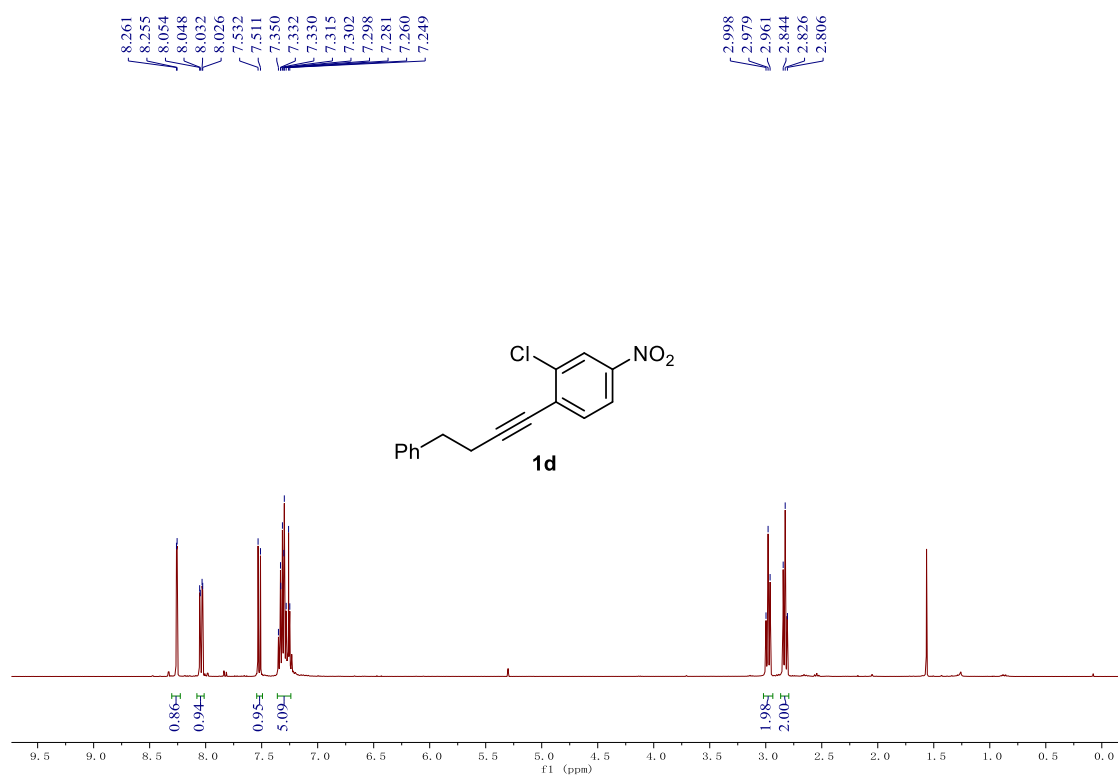

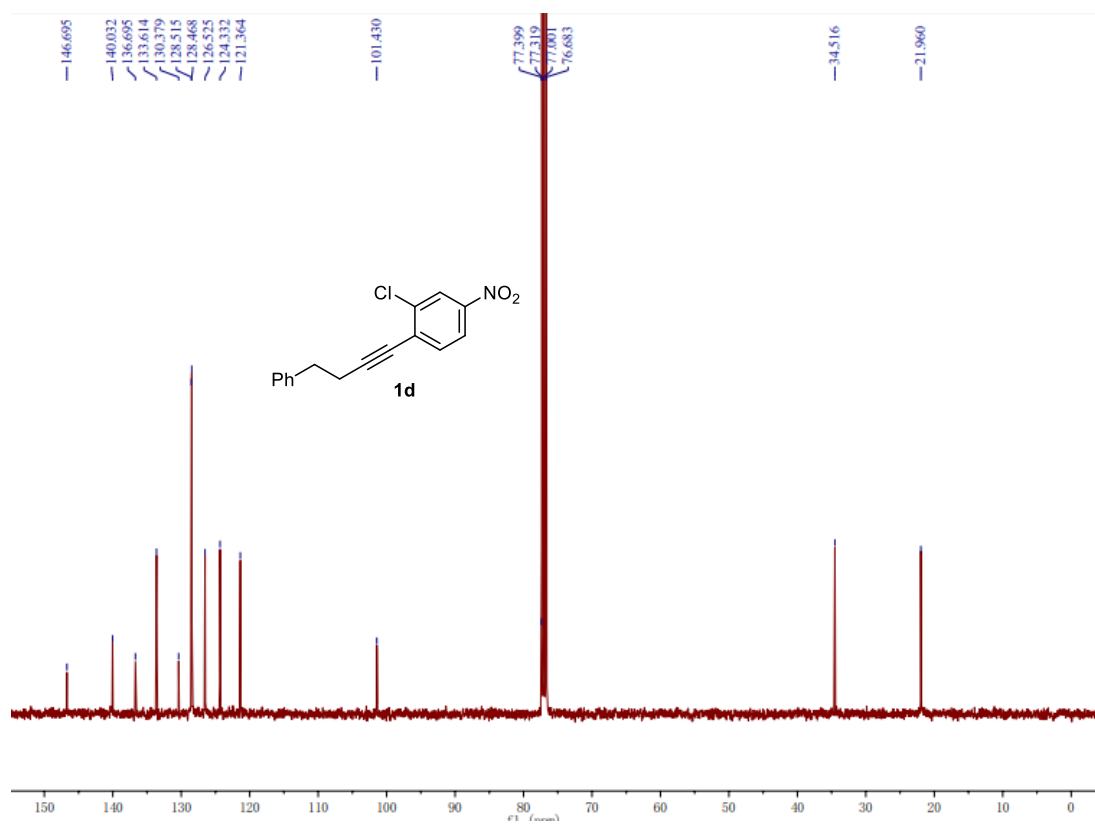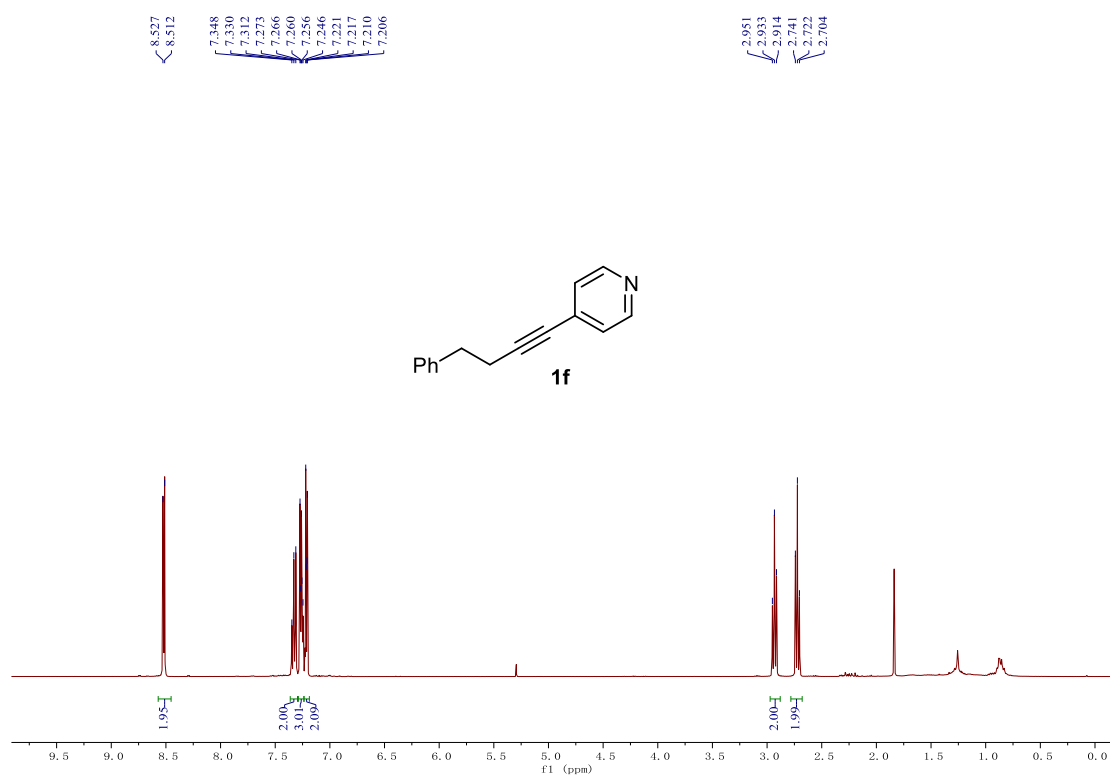

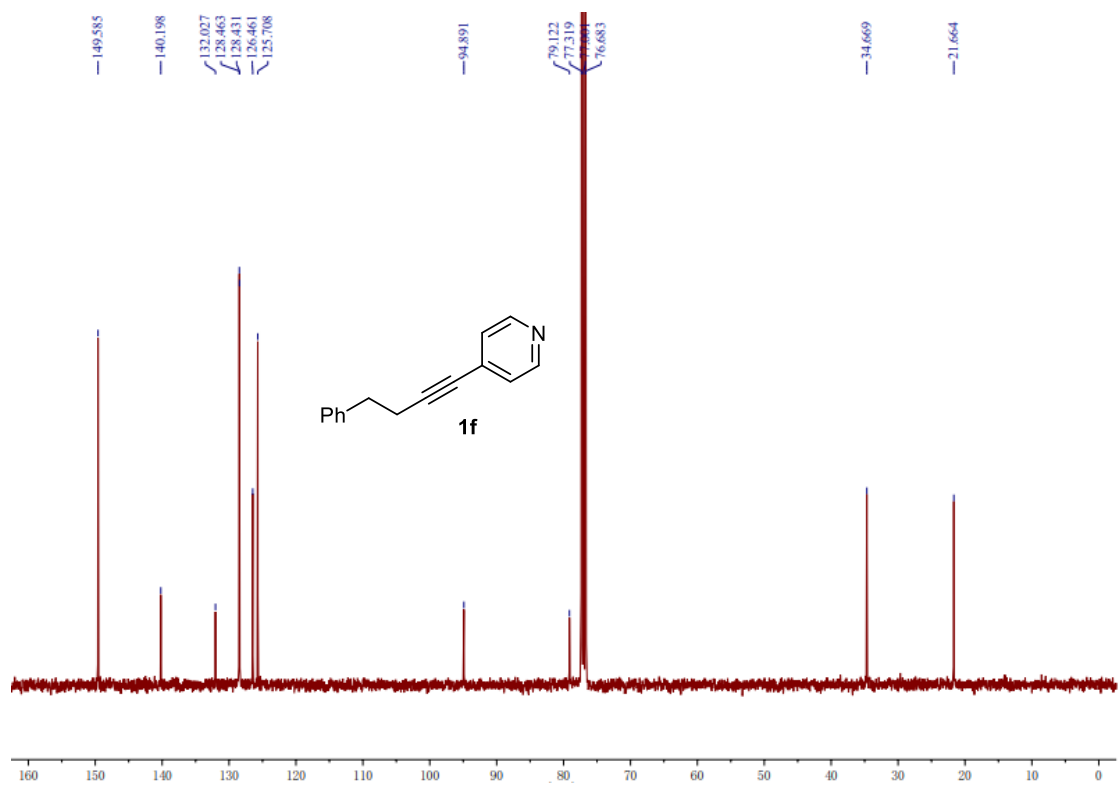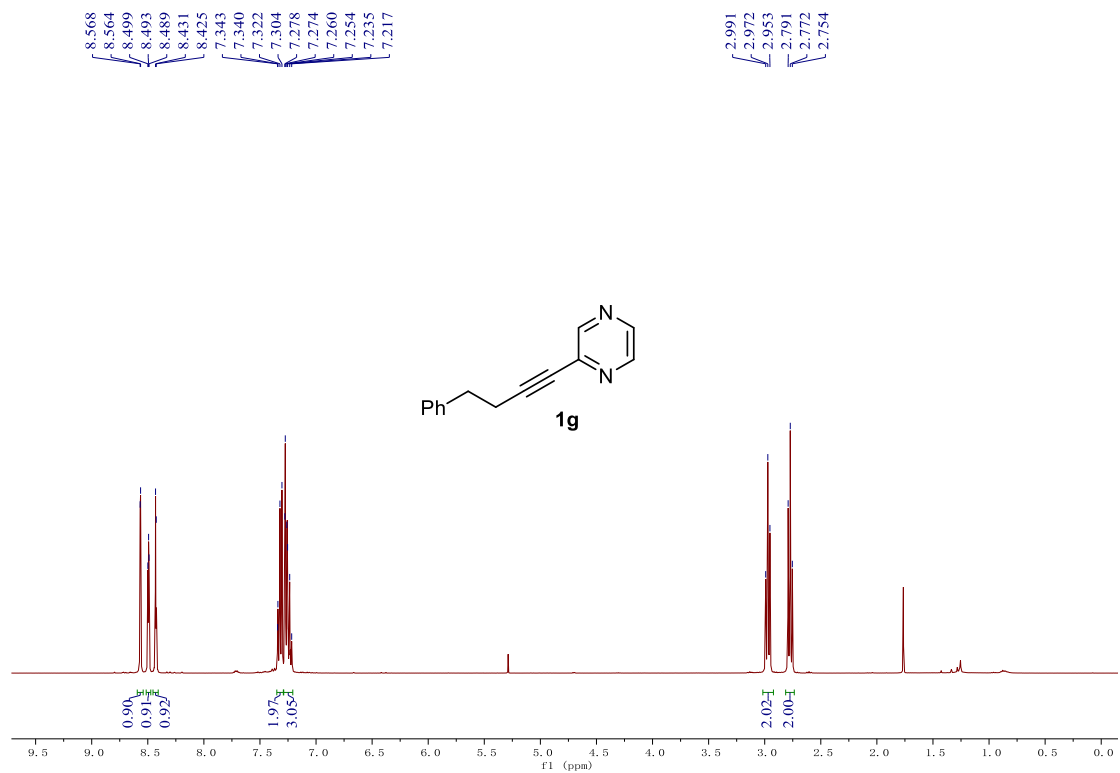

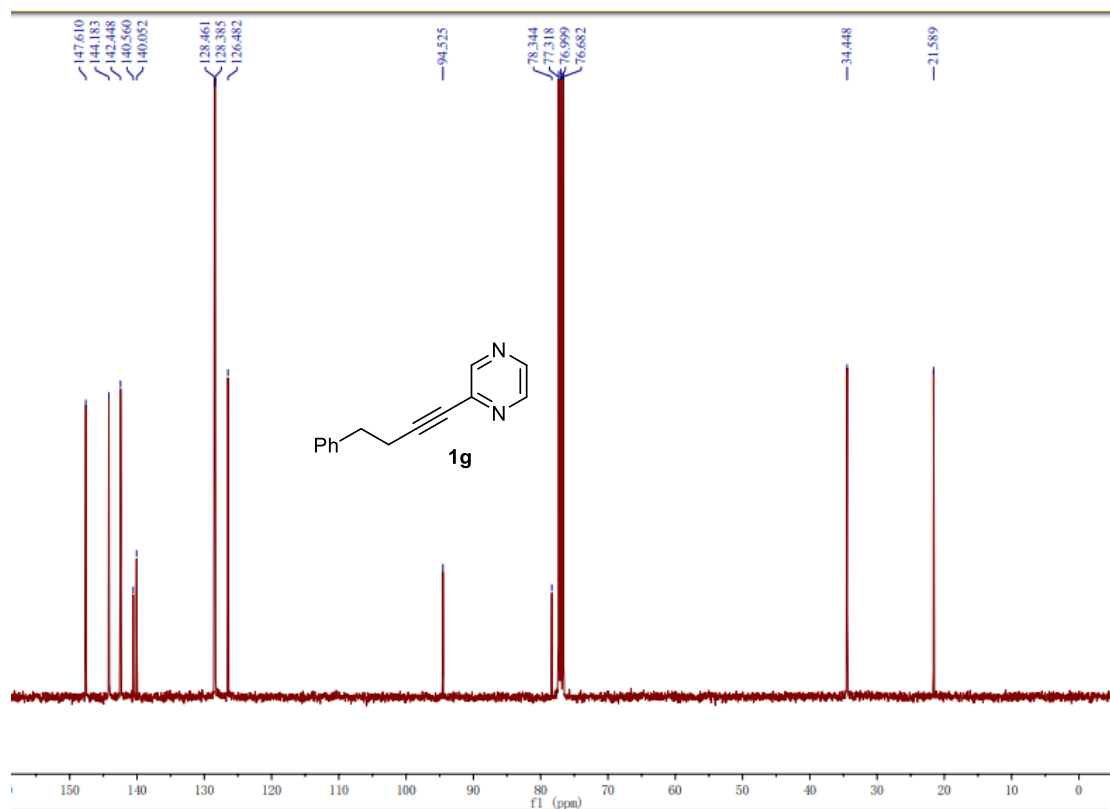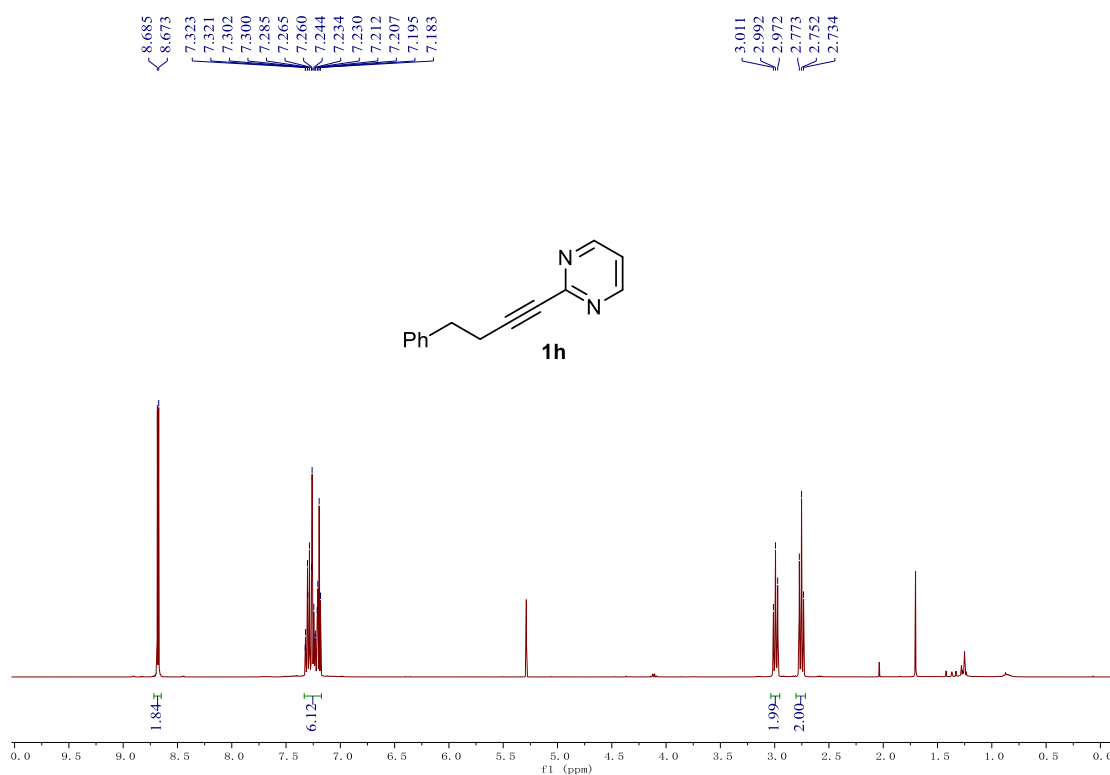

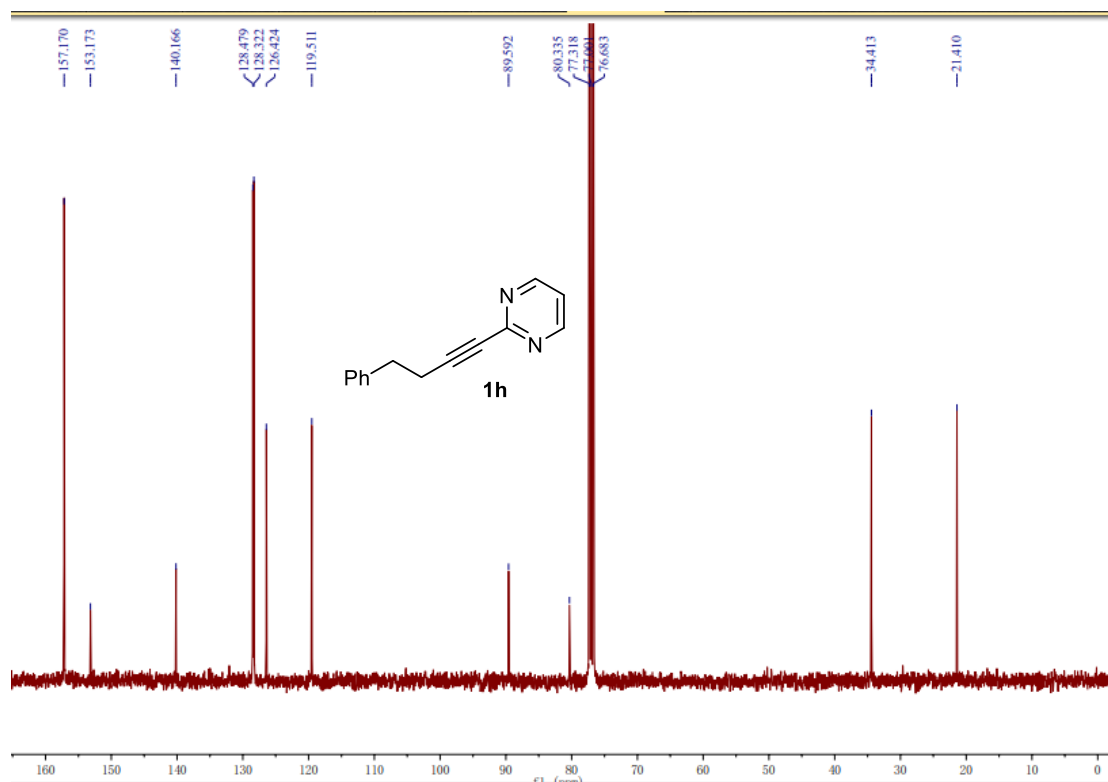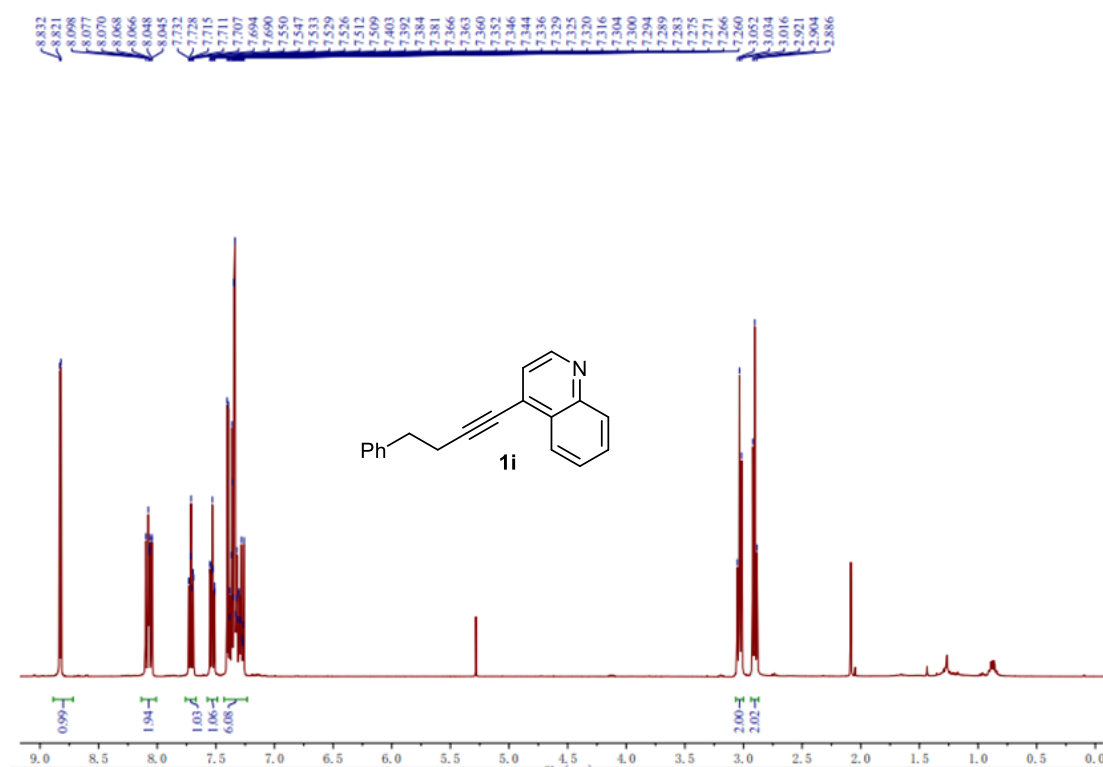



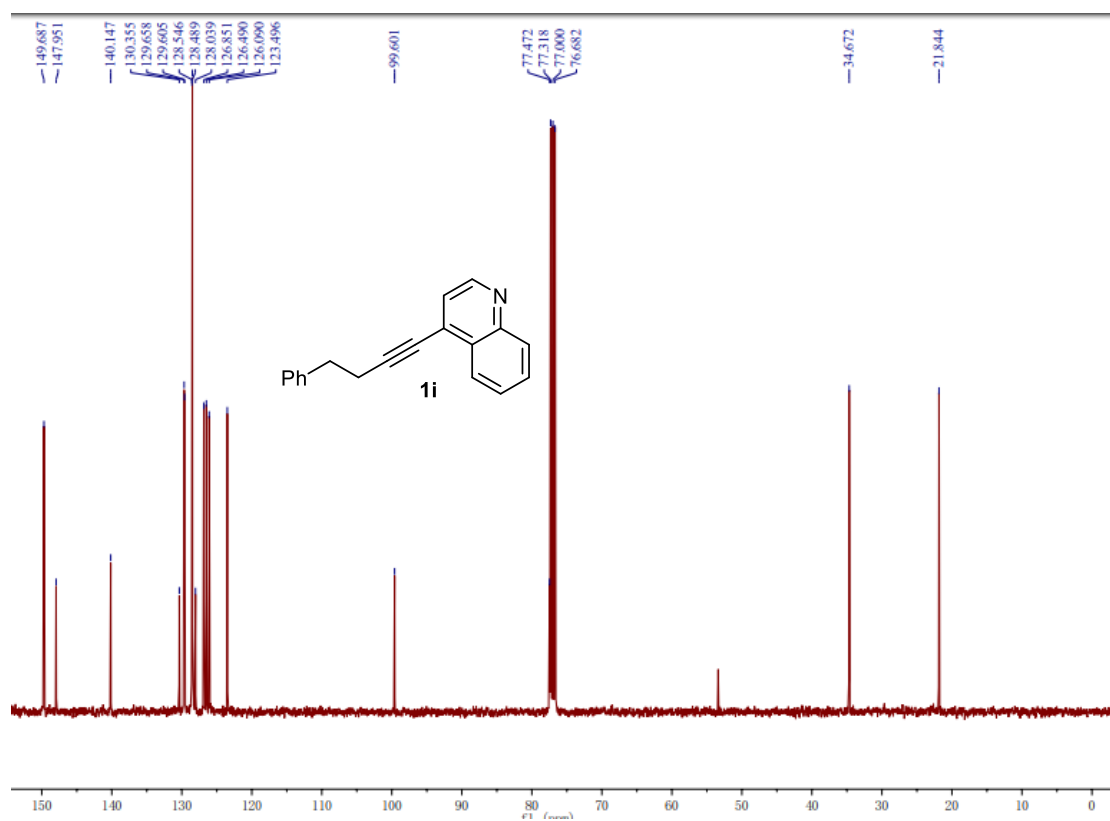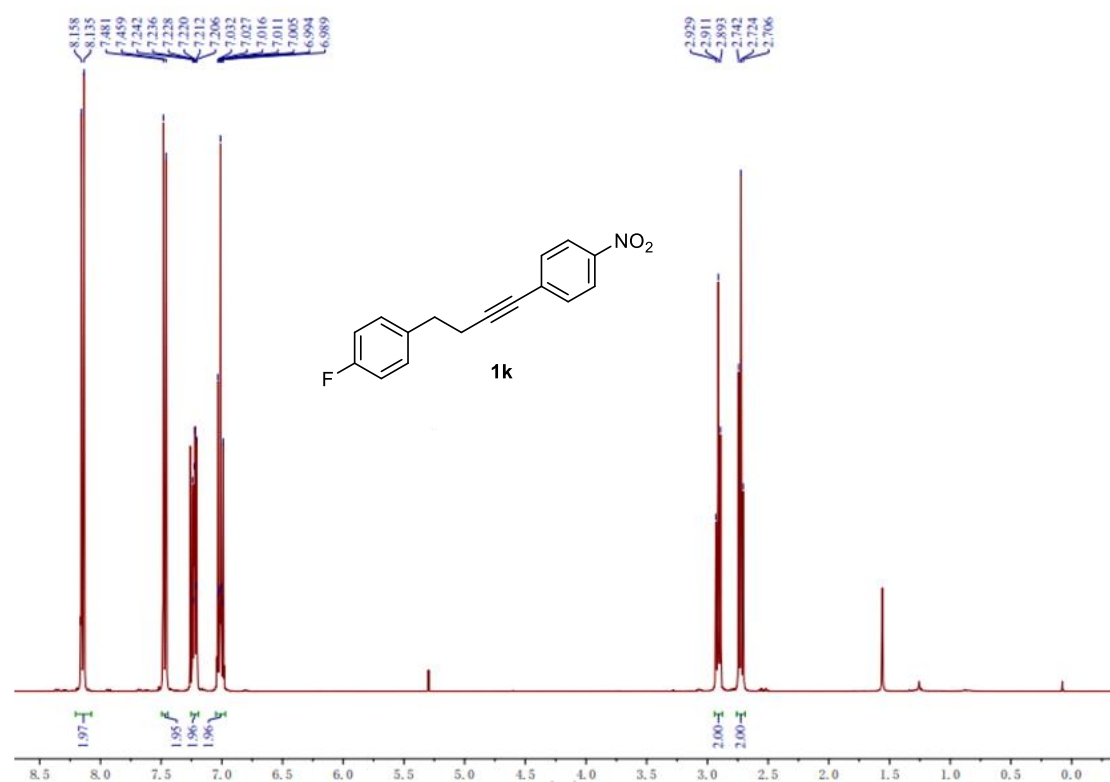

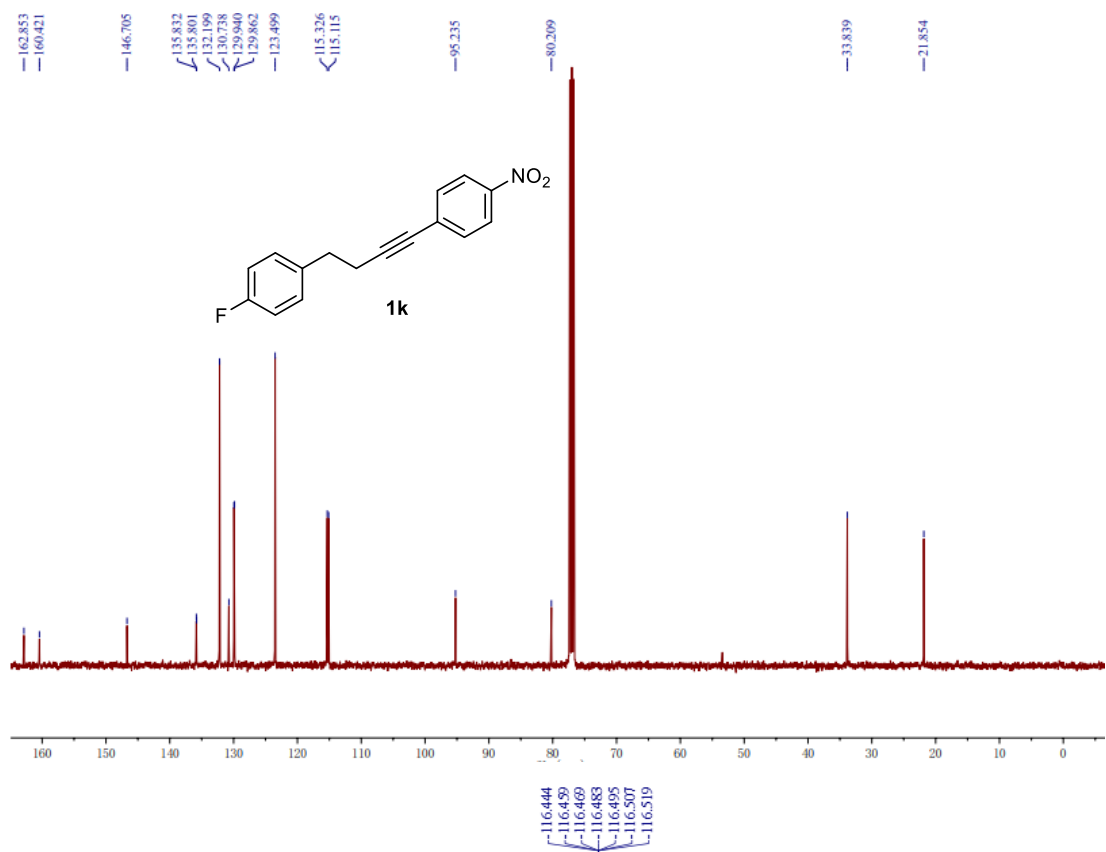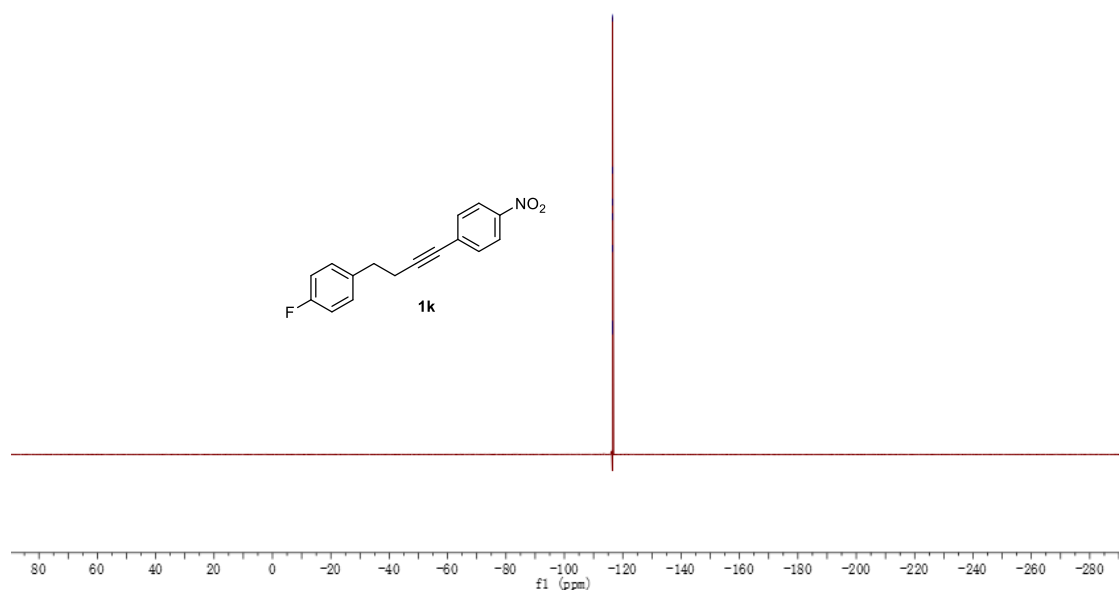

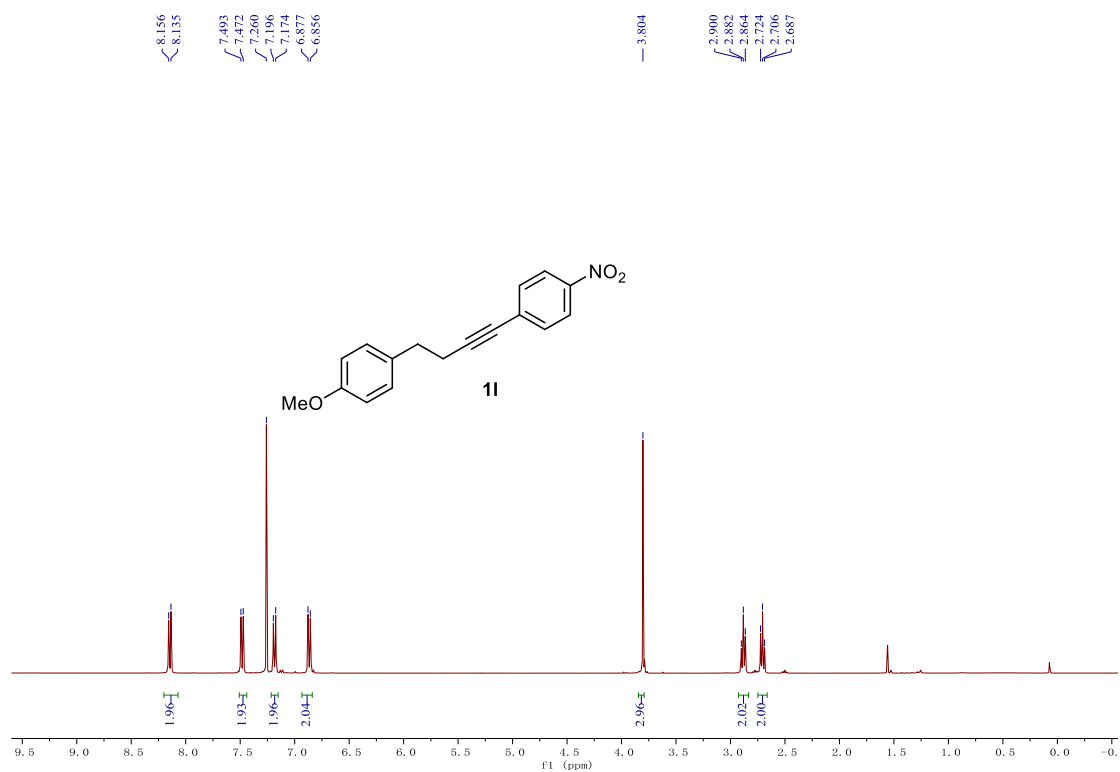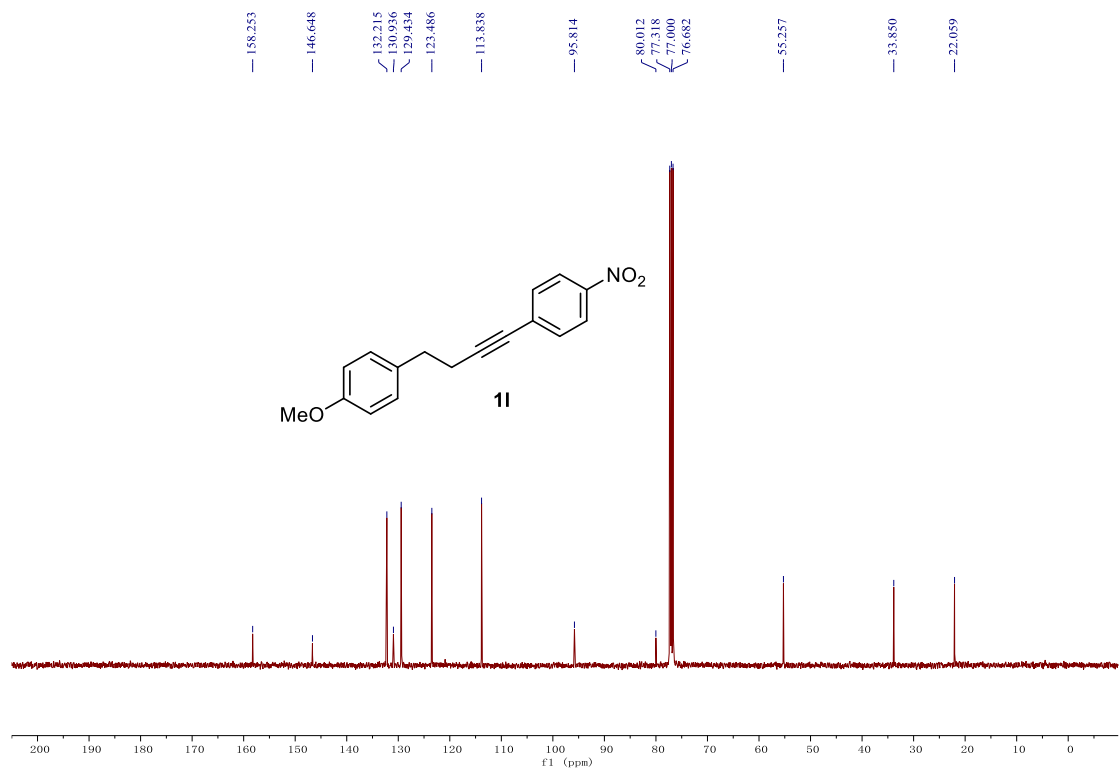

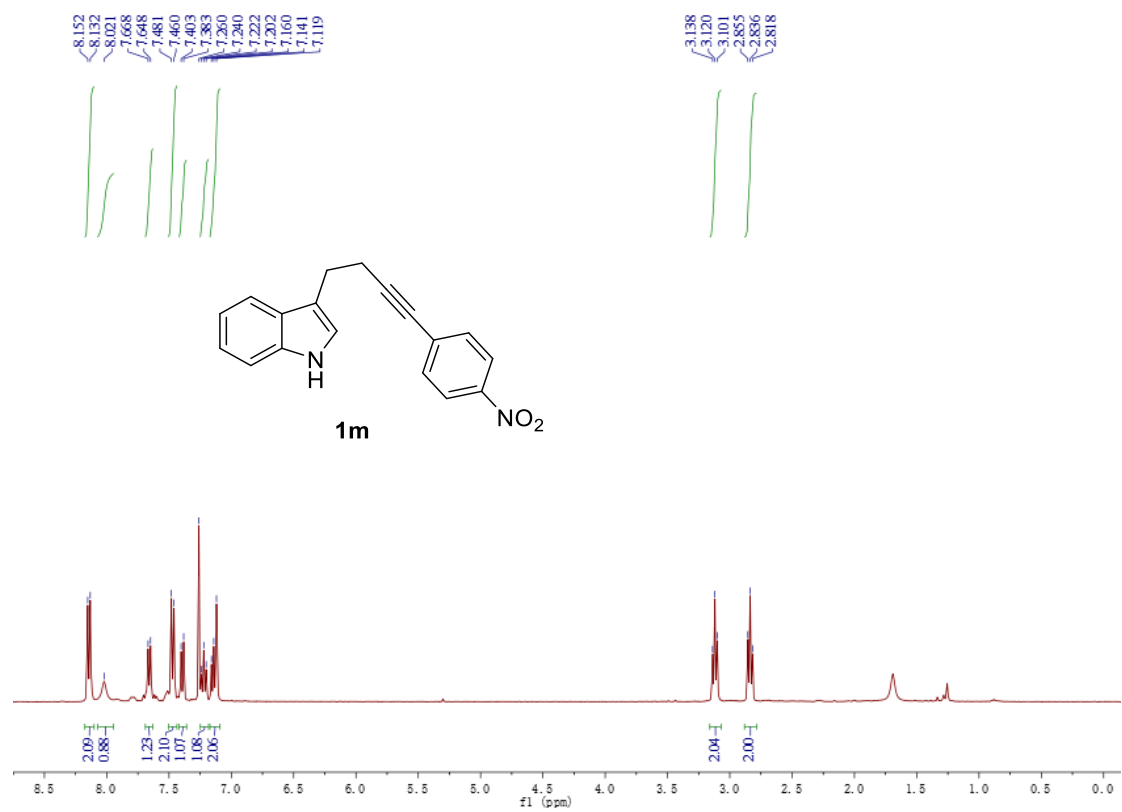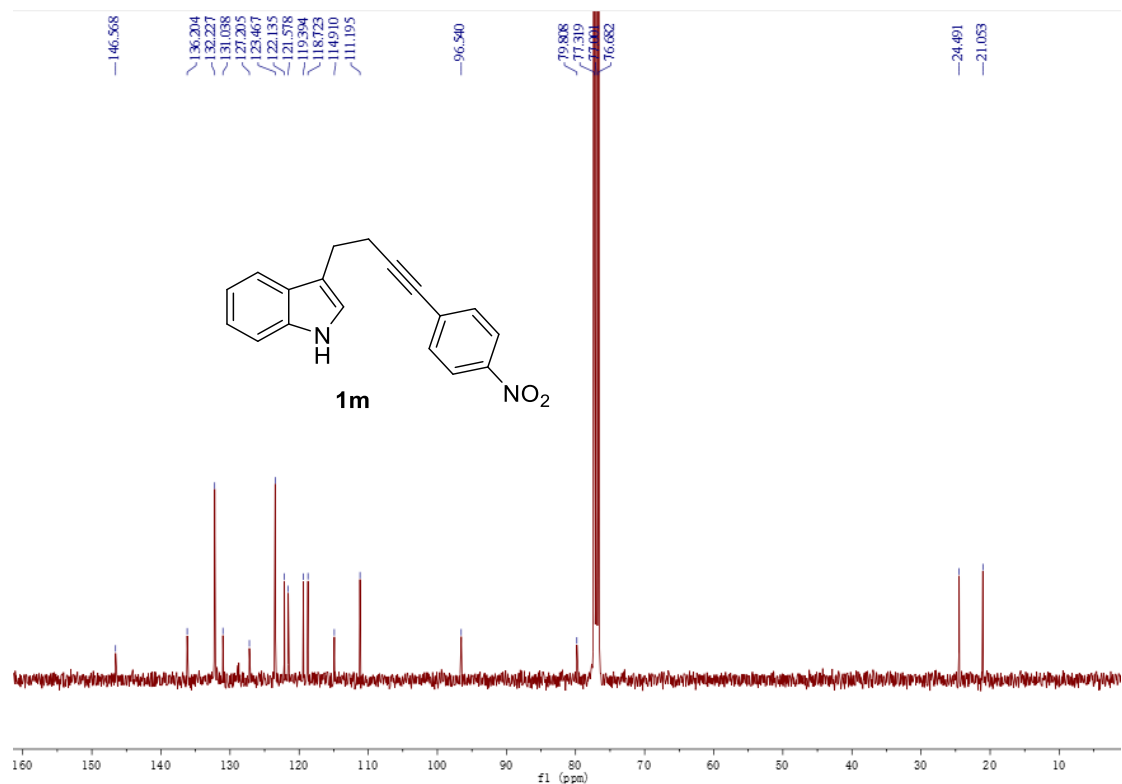

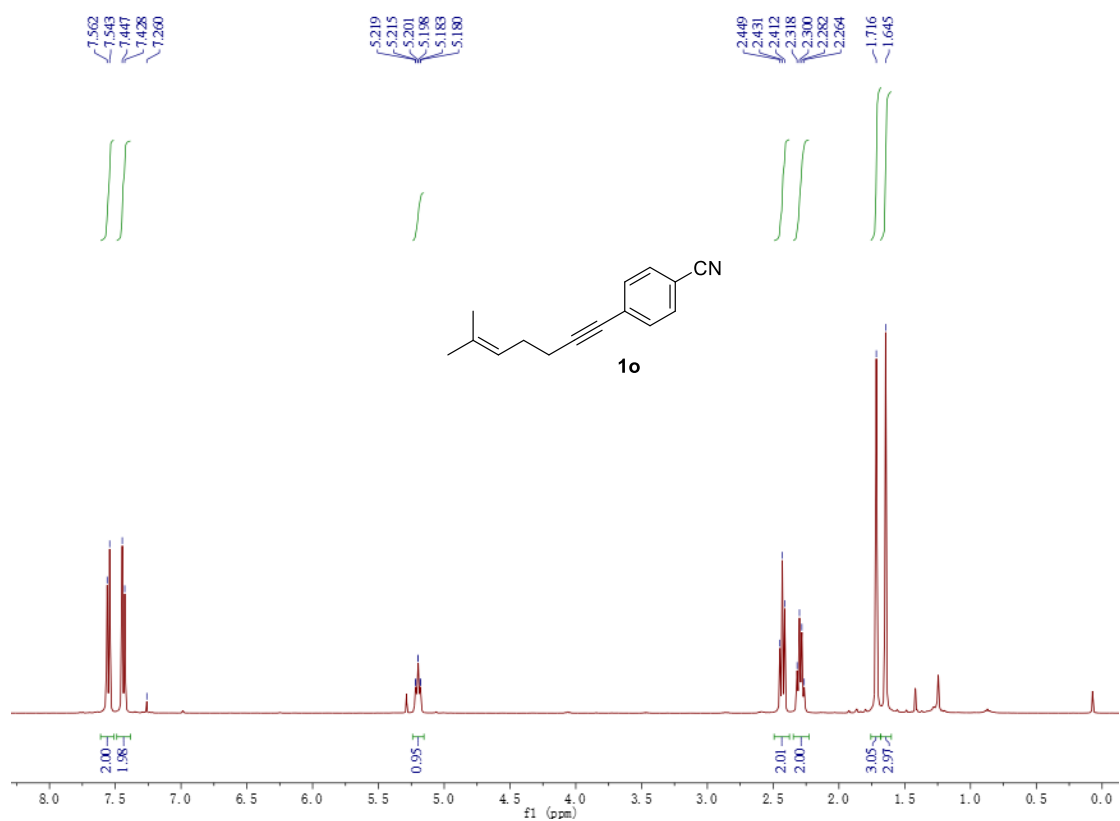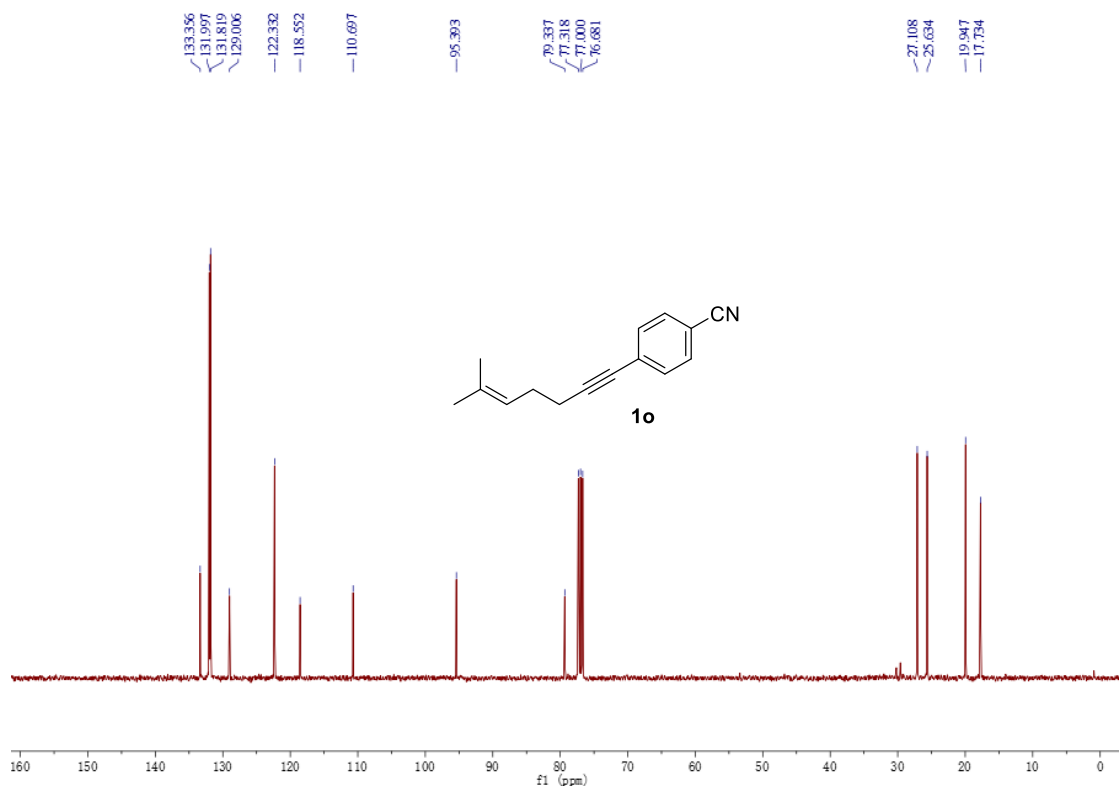

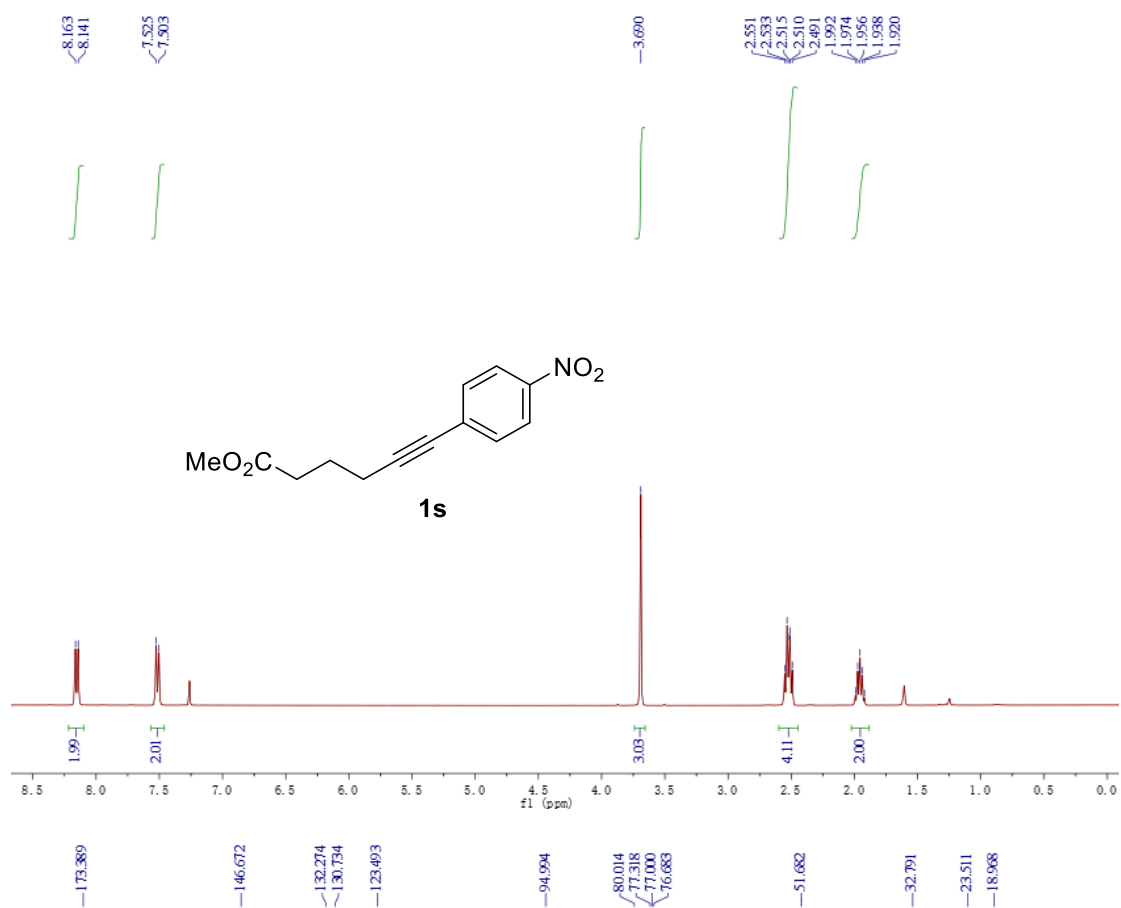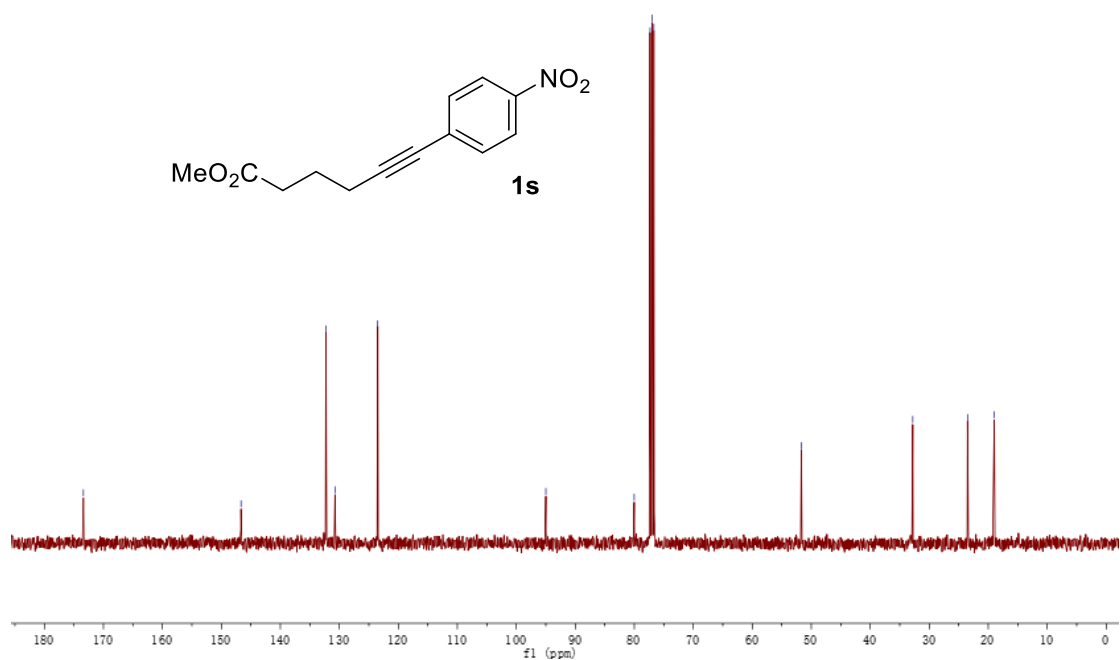

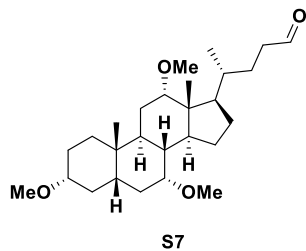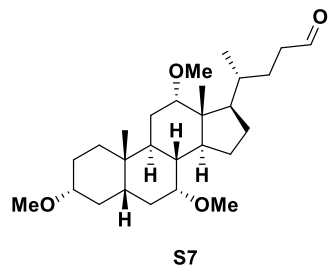

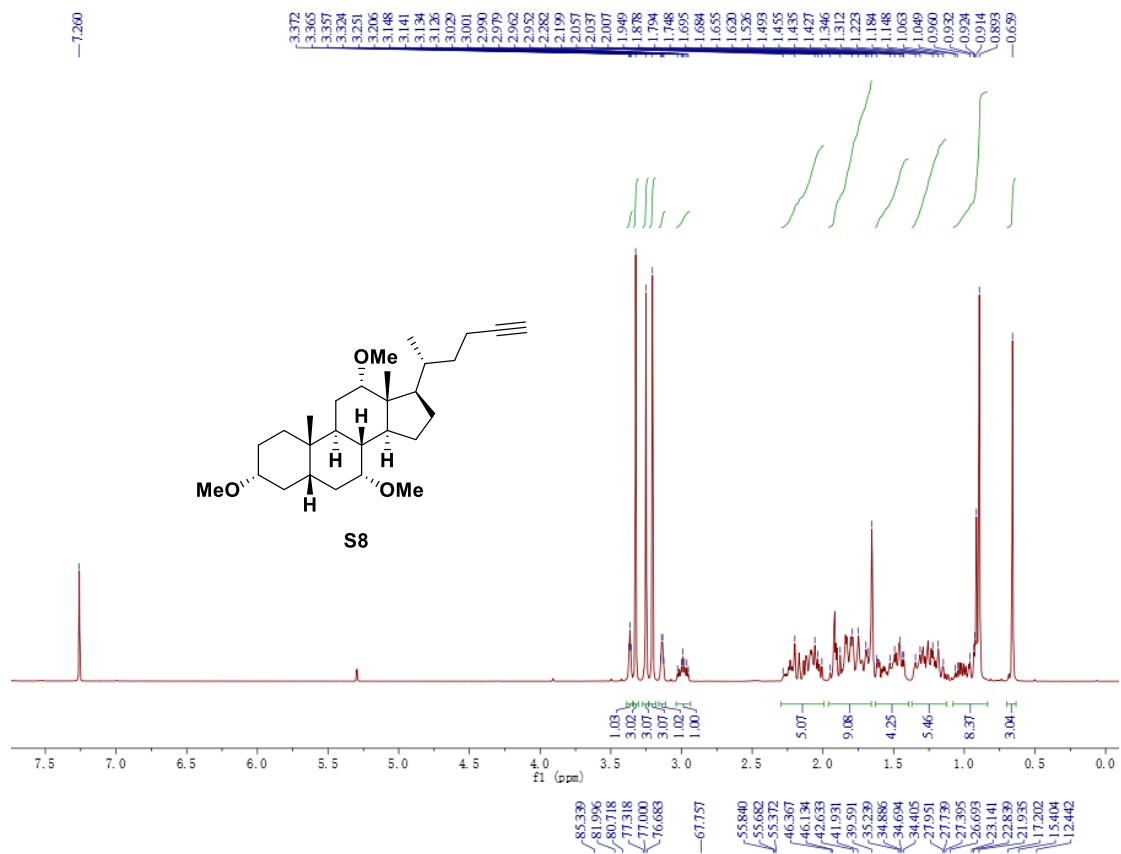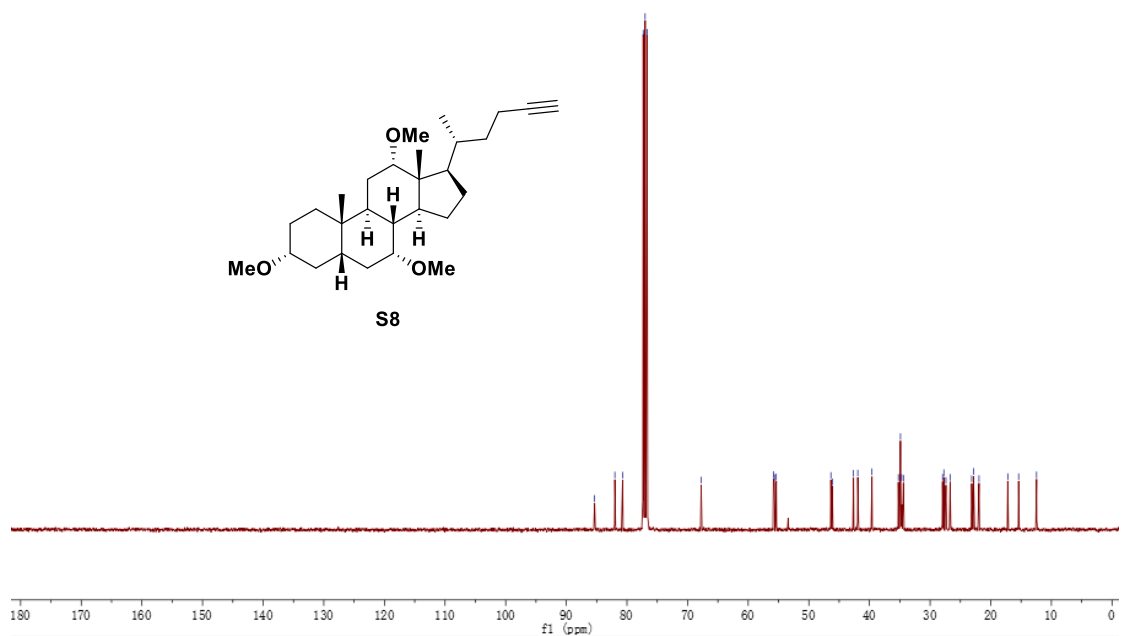



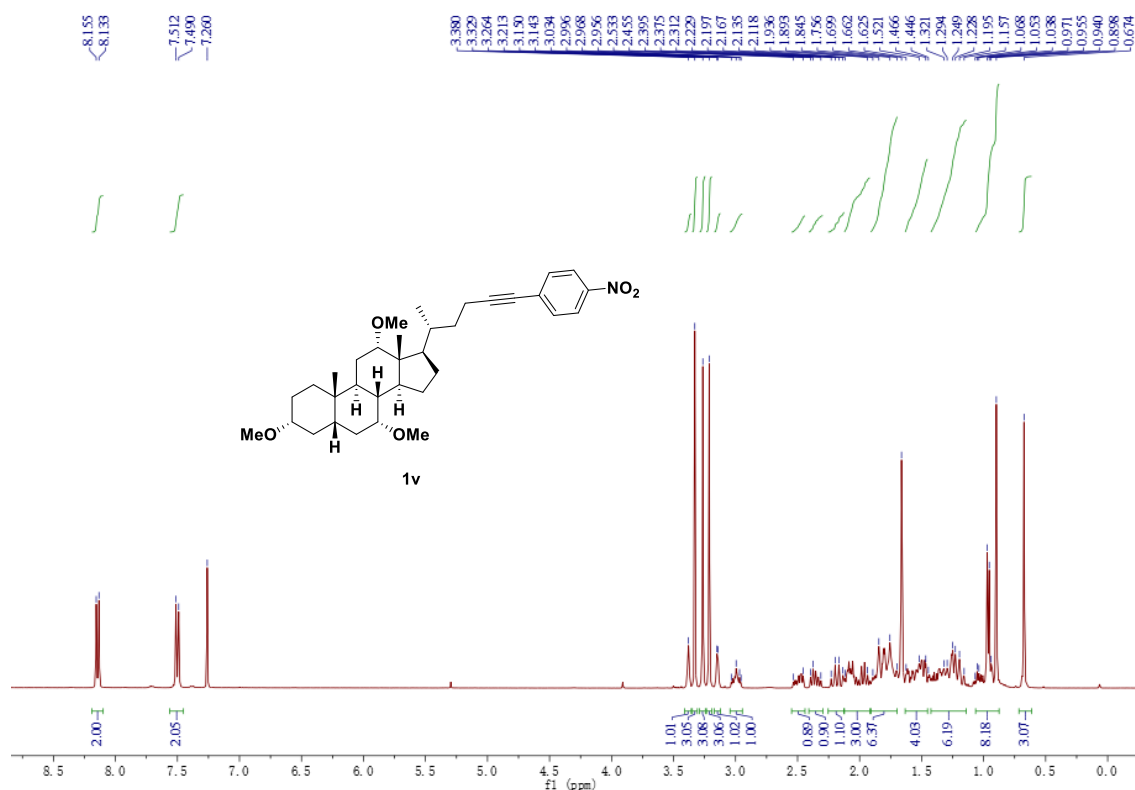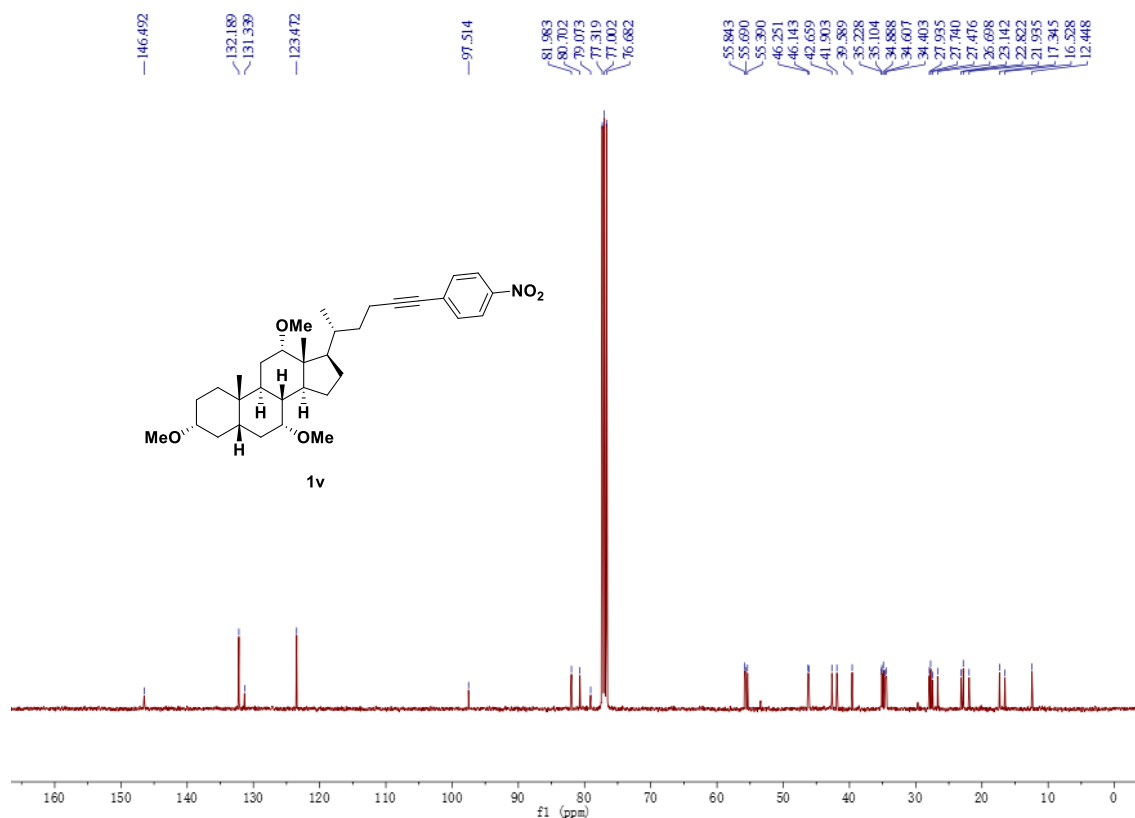

## NMR spectra of compound 3

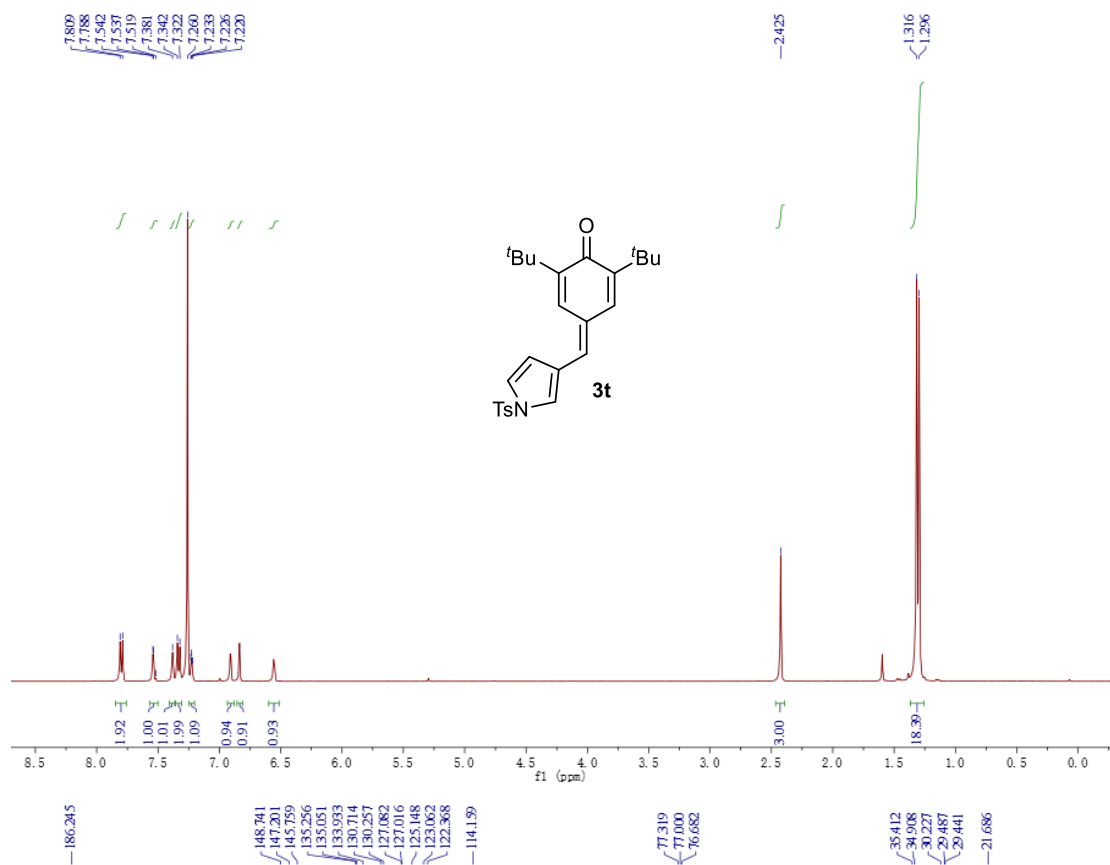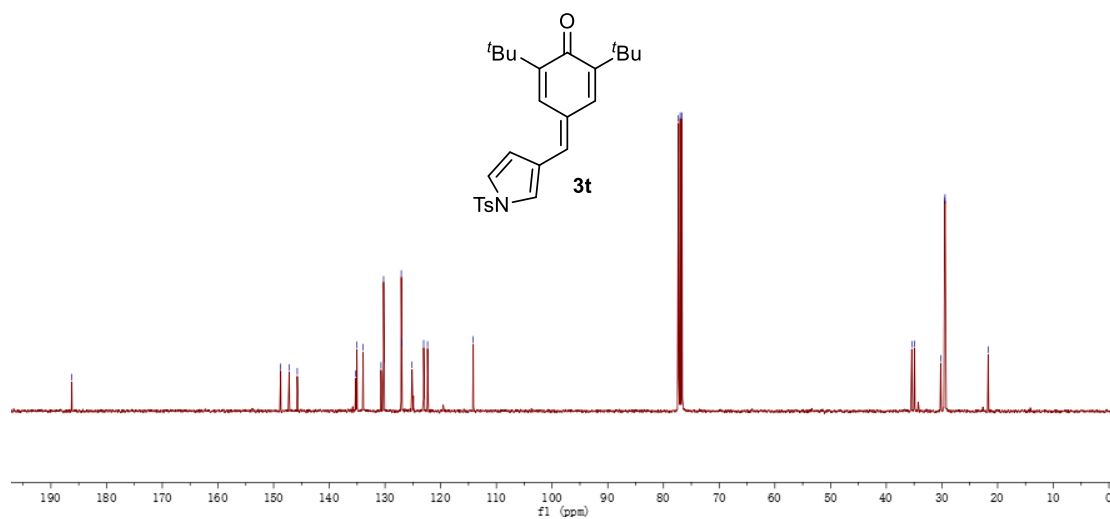

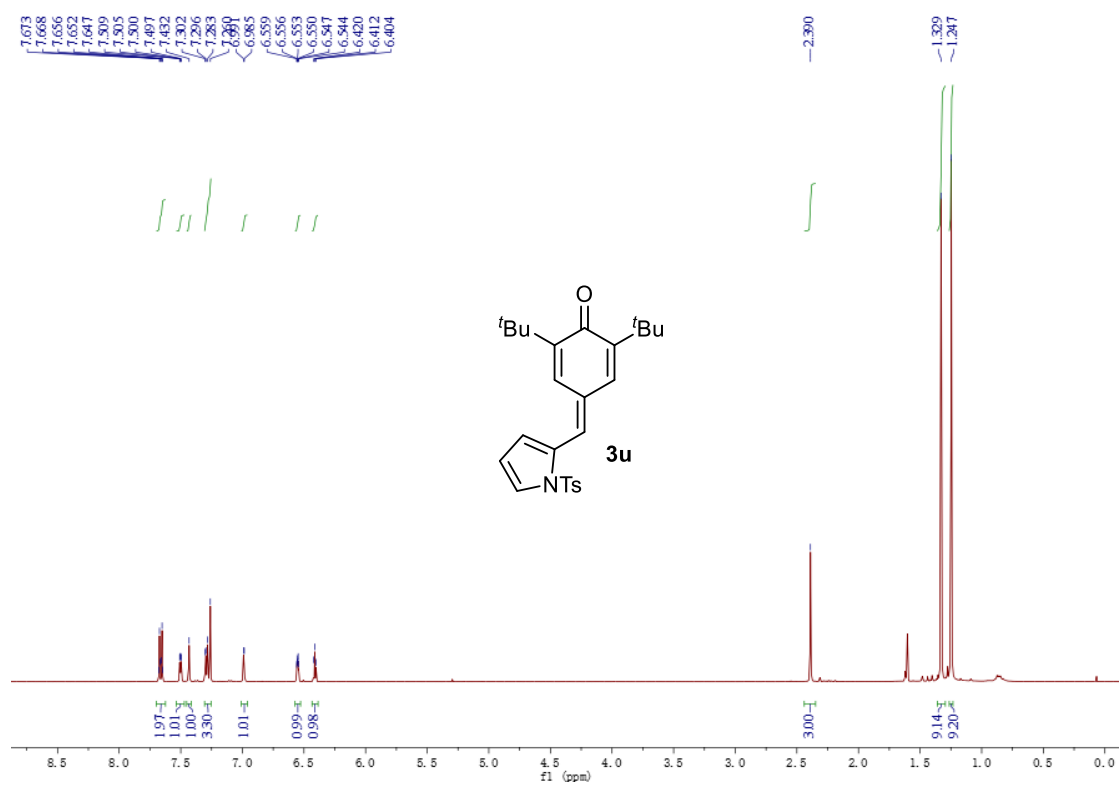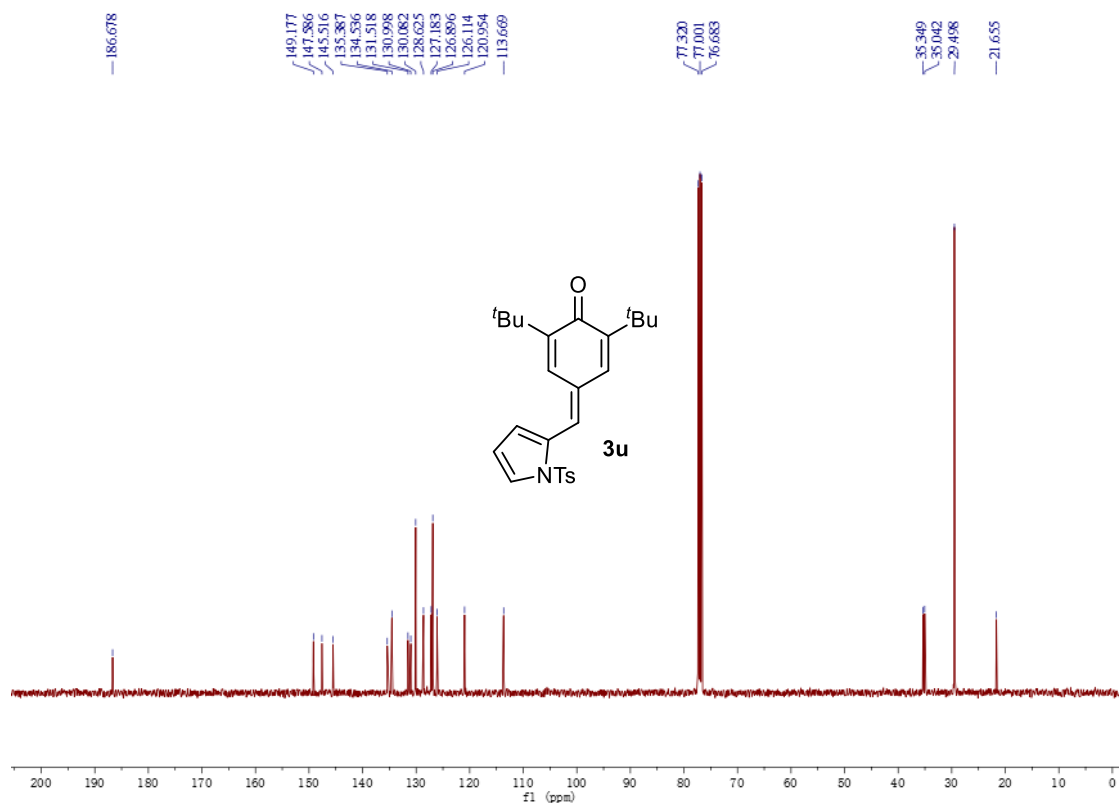

## NMR spectra of compound 2 and 4

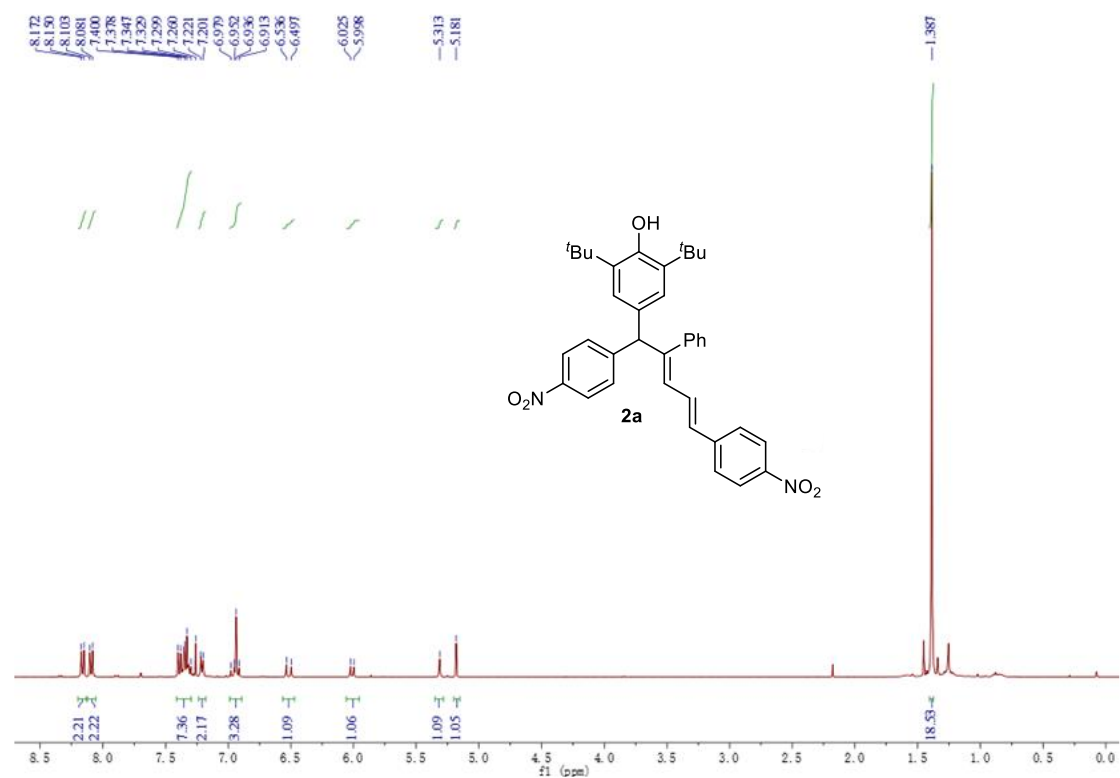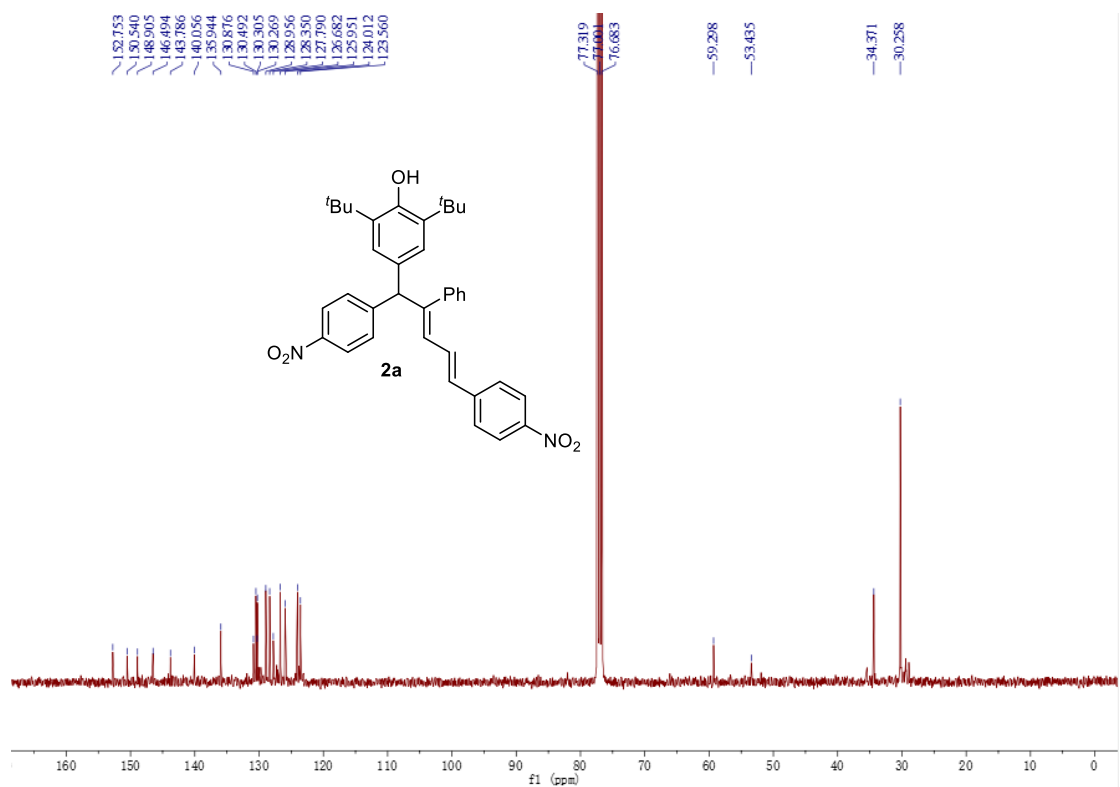

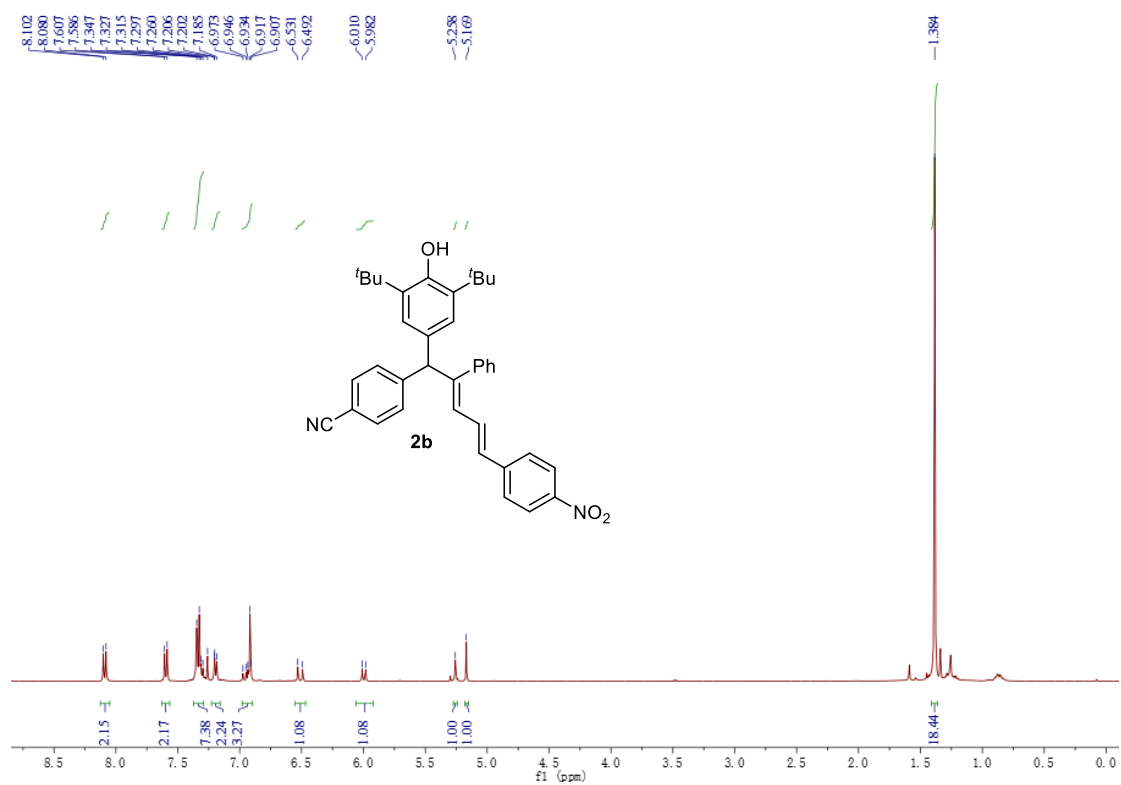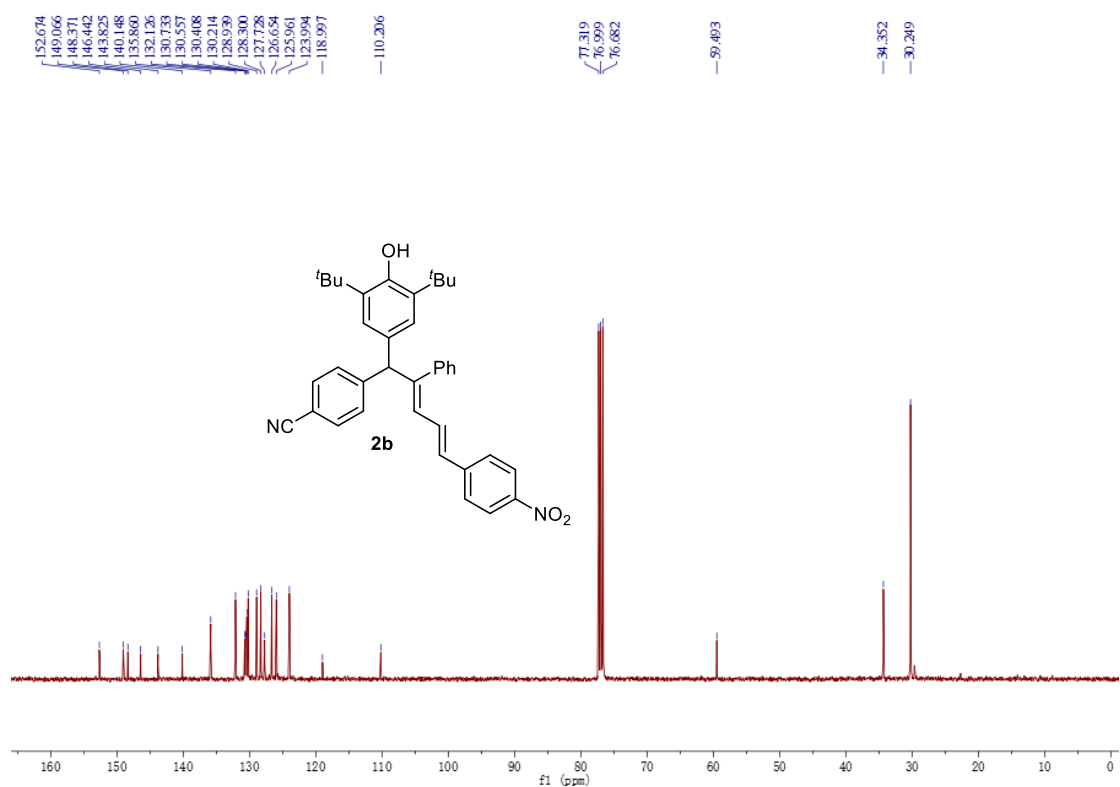

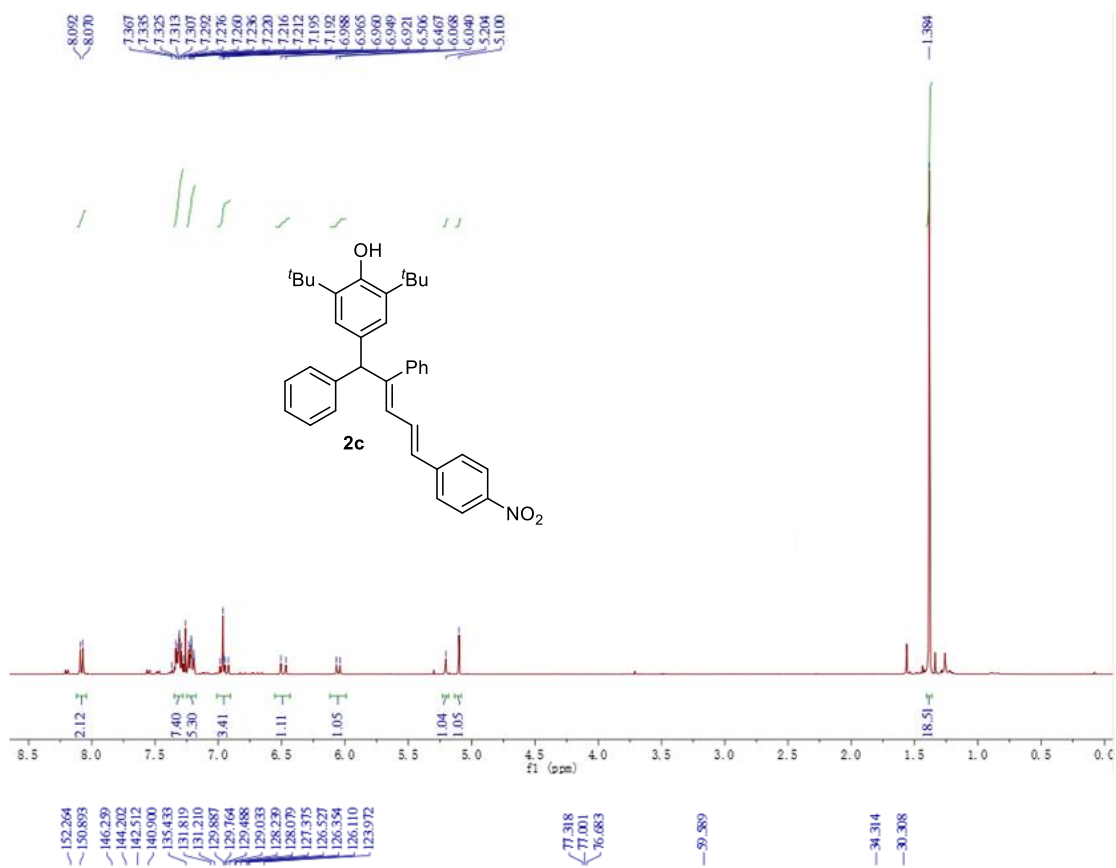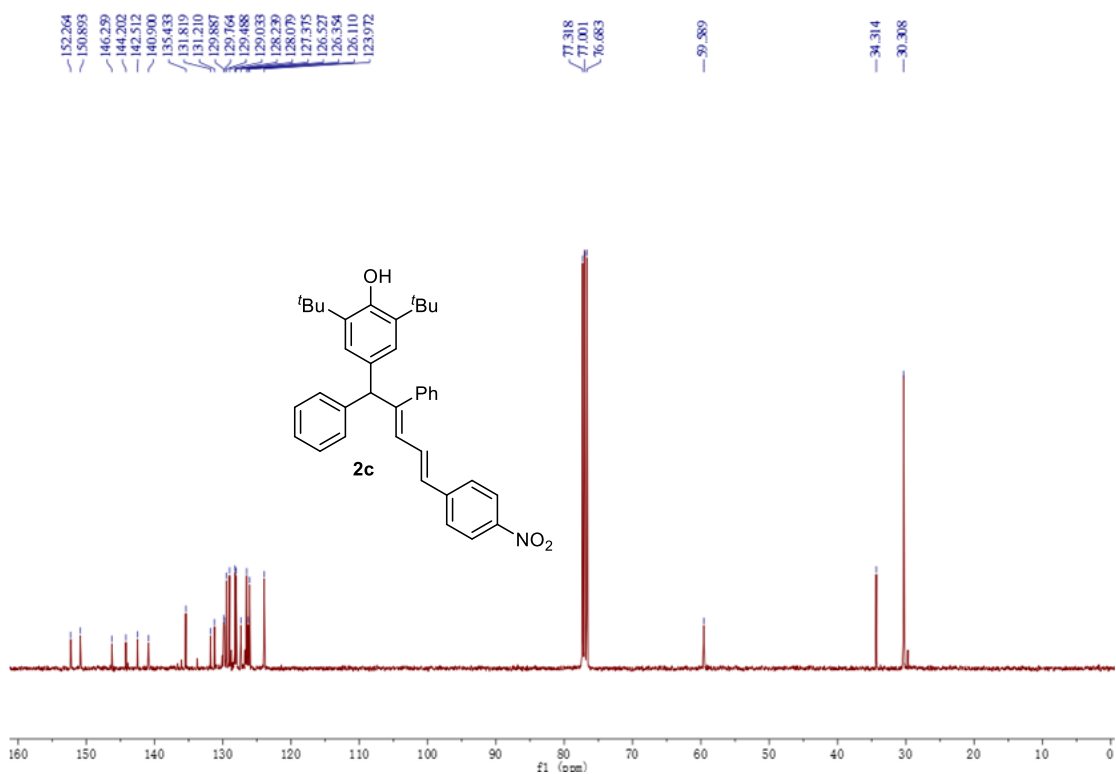

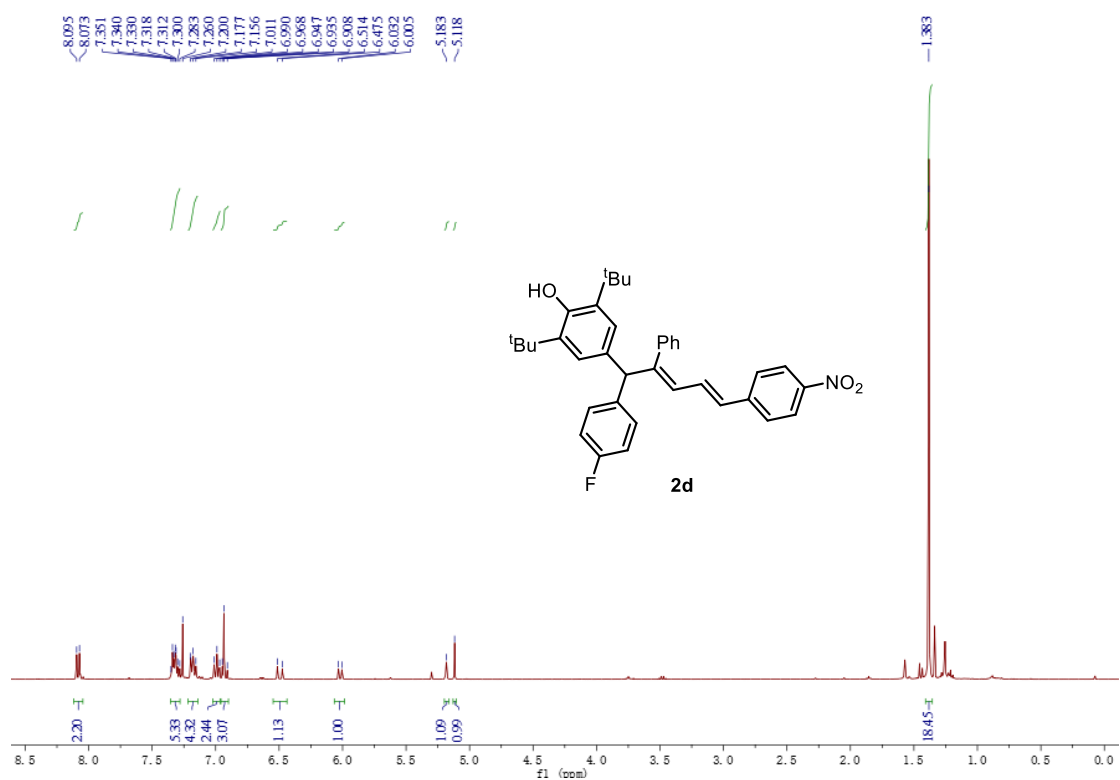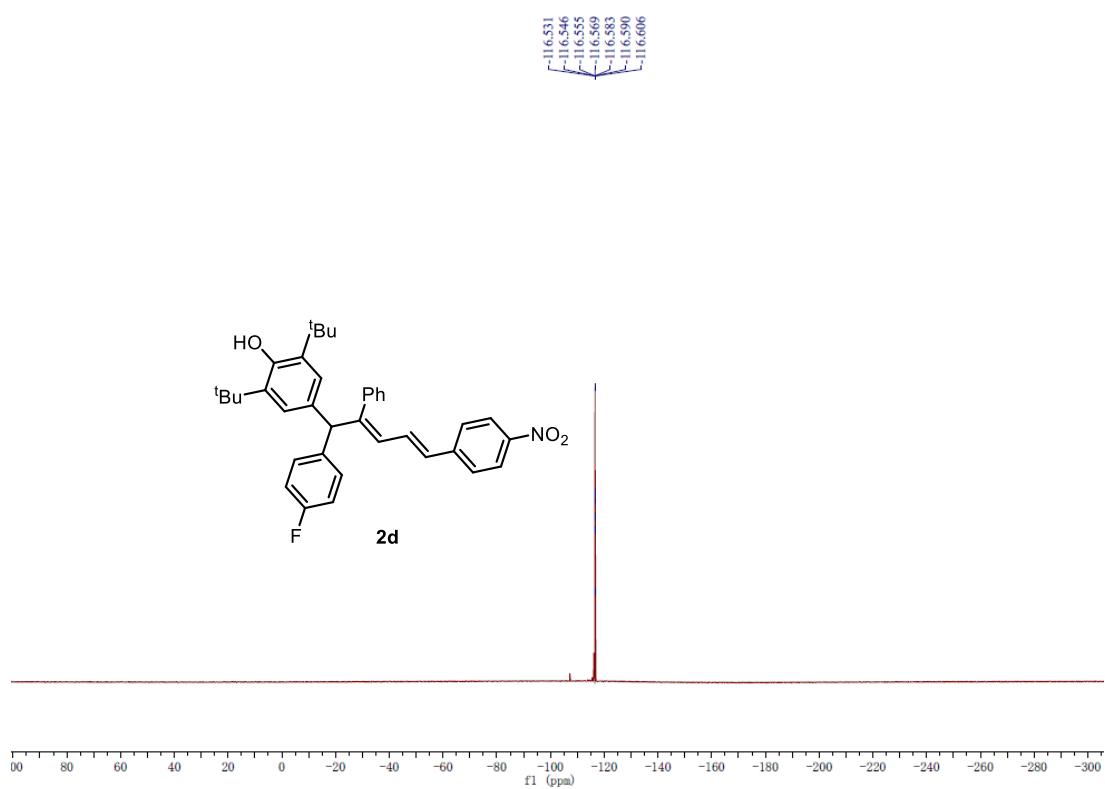

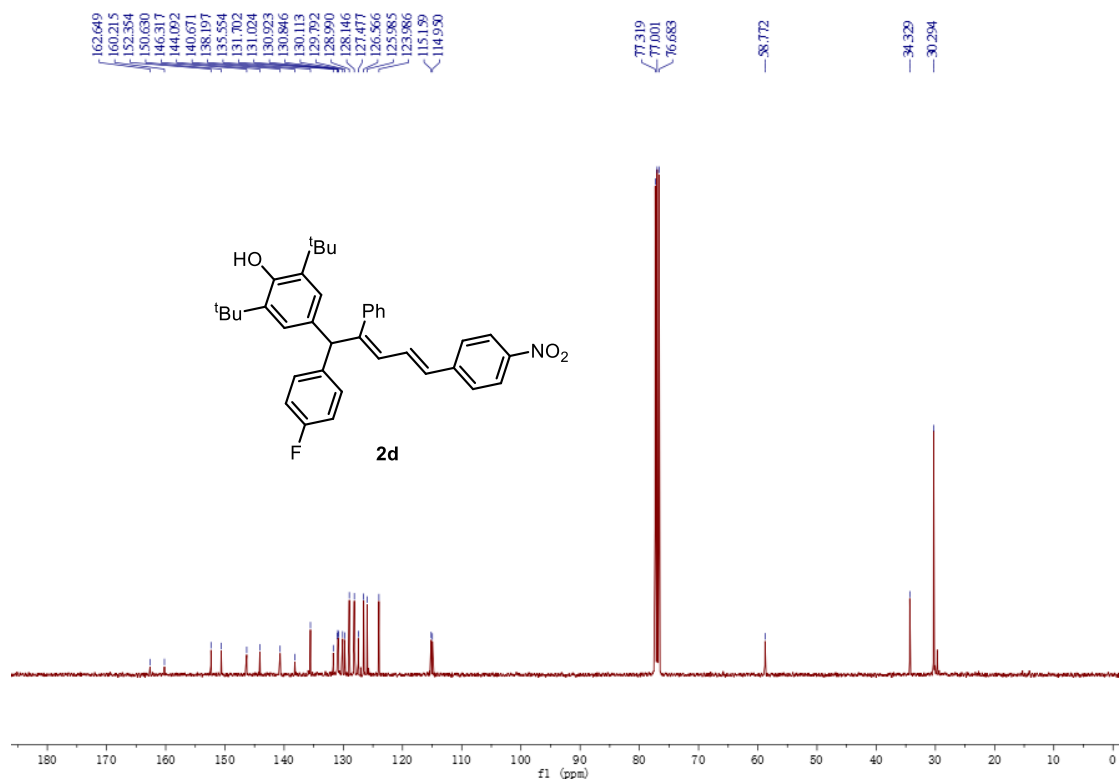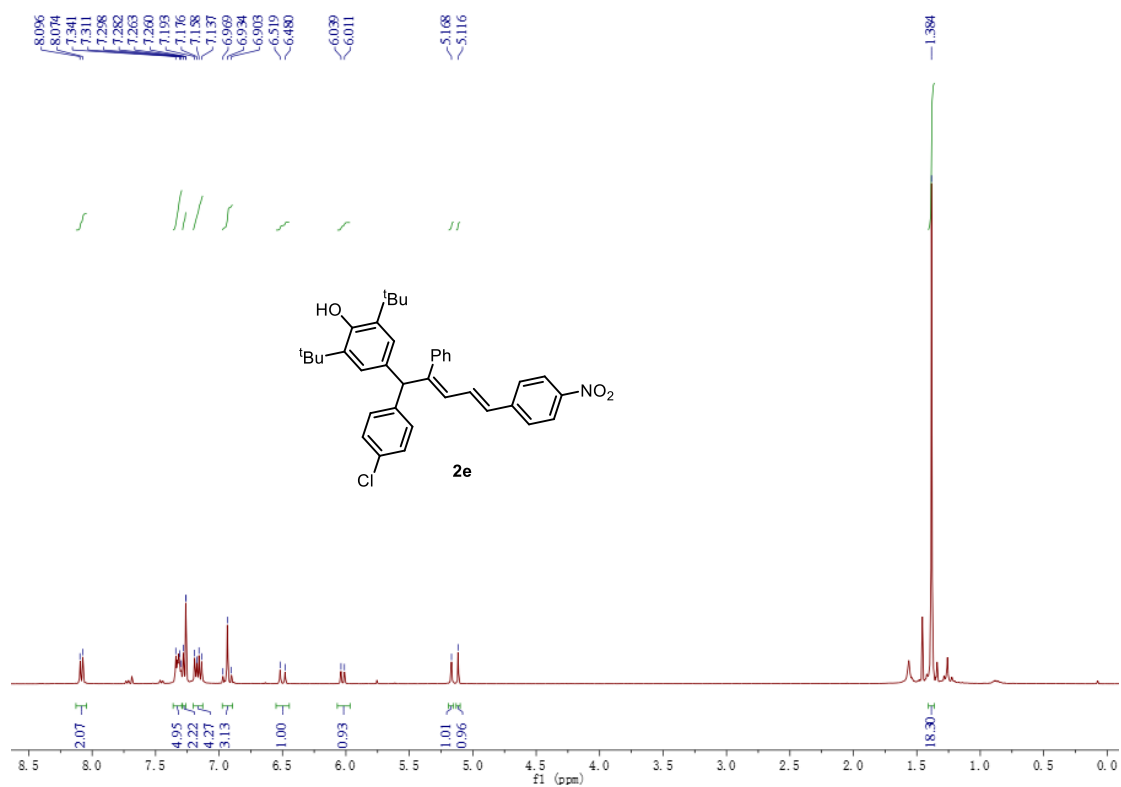



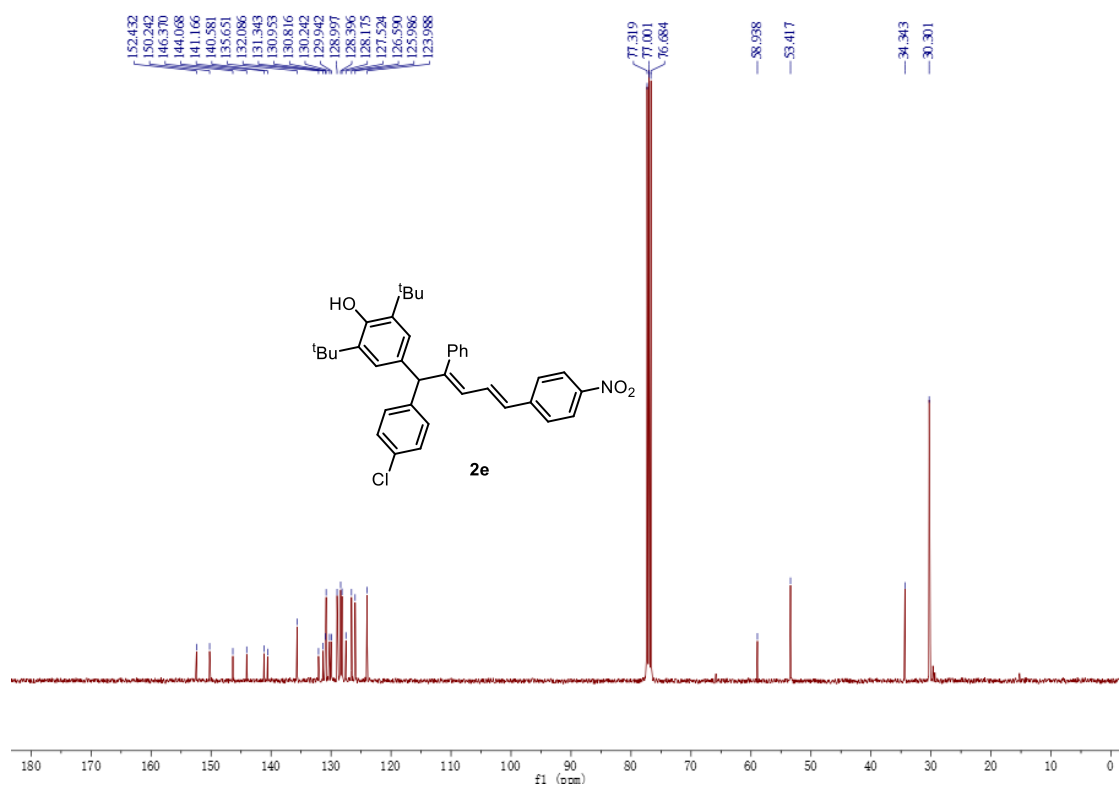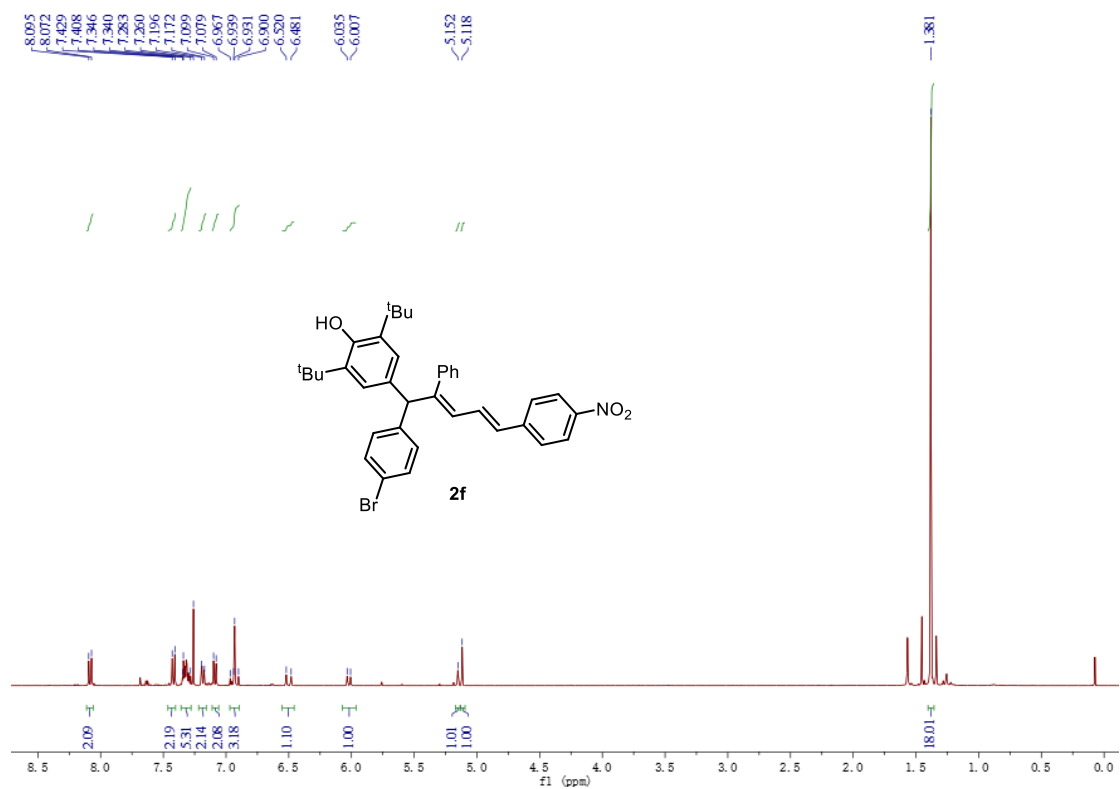

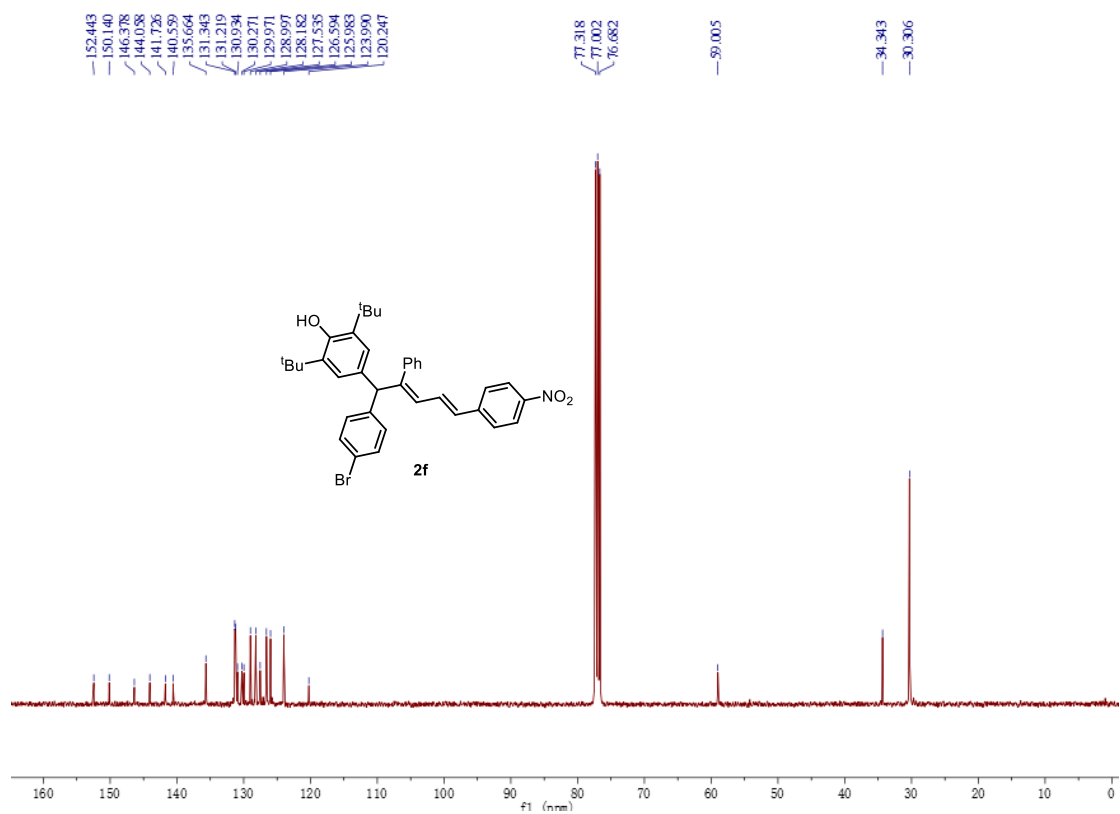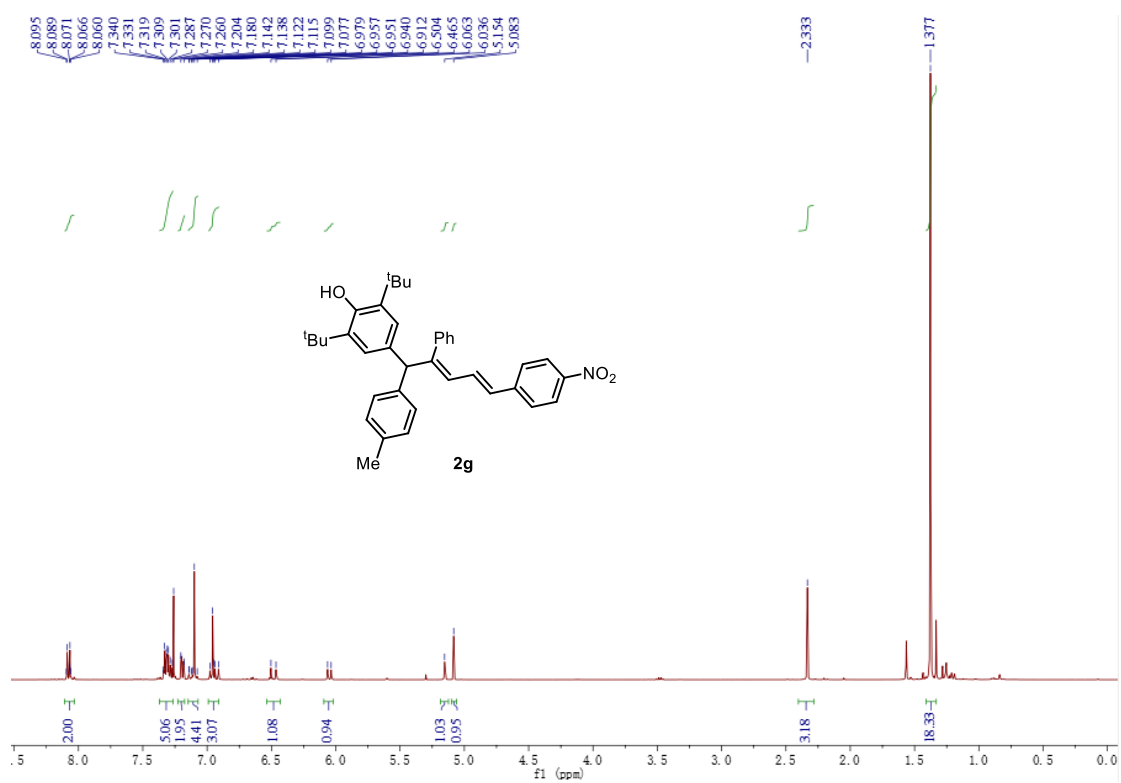

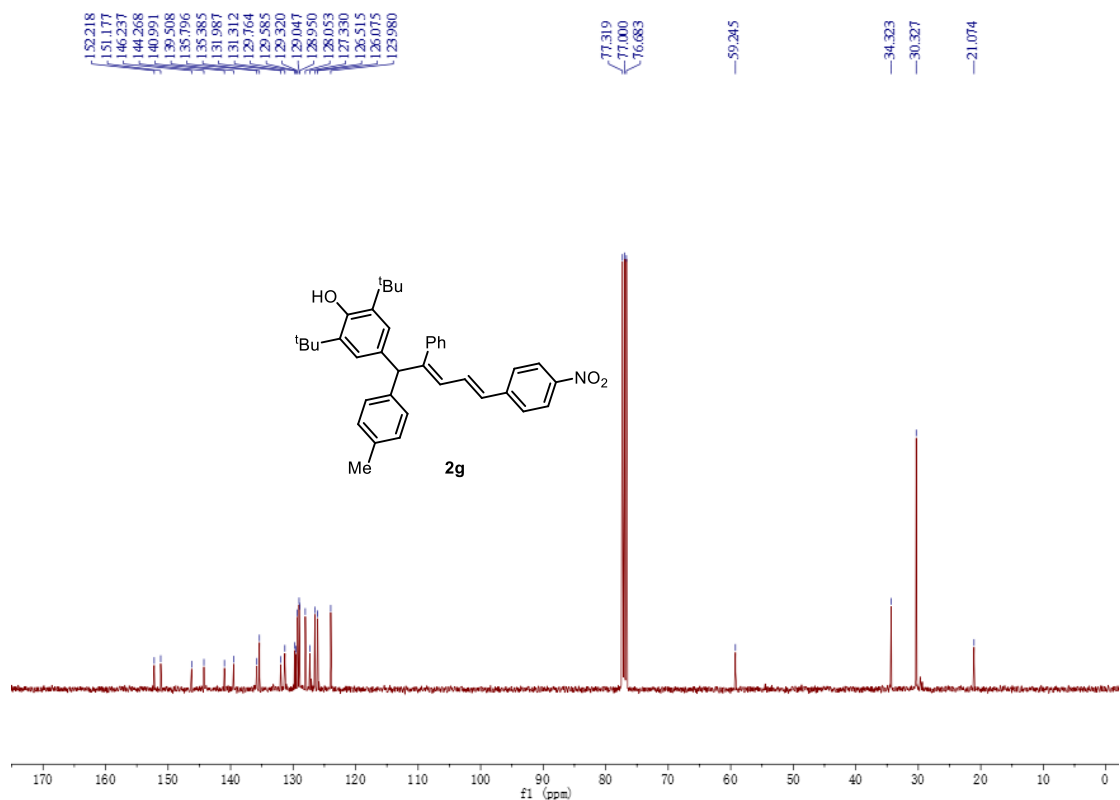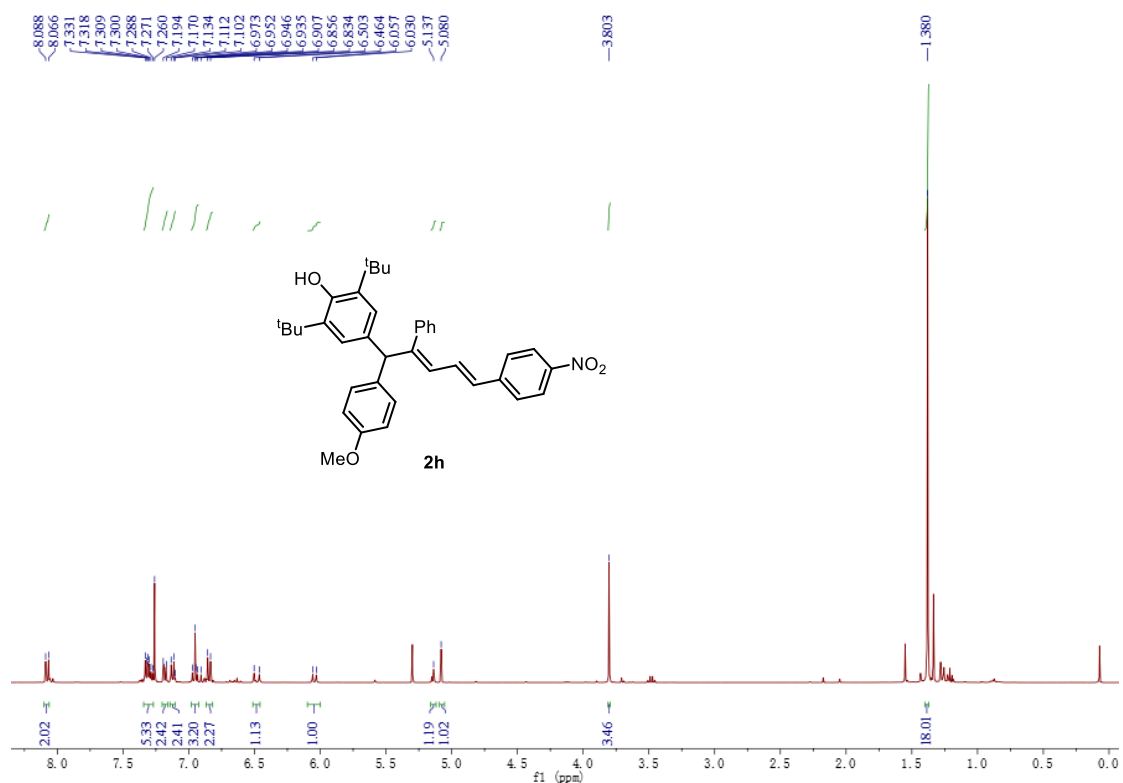

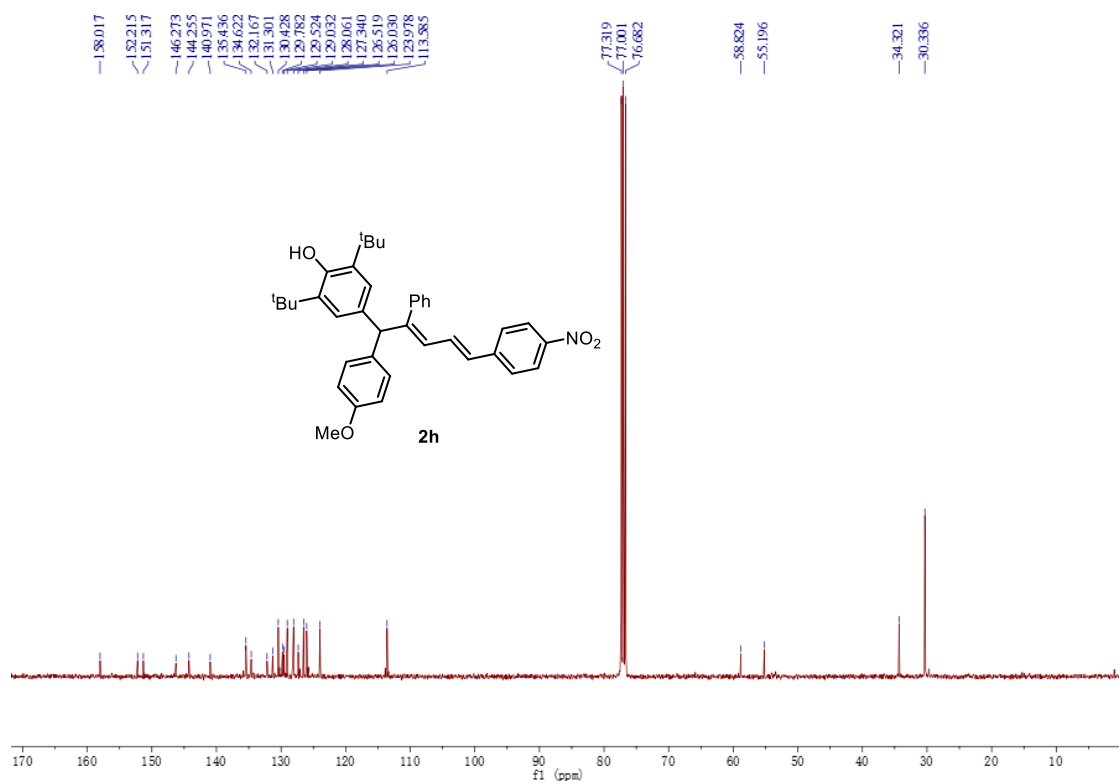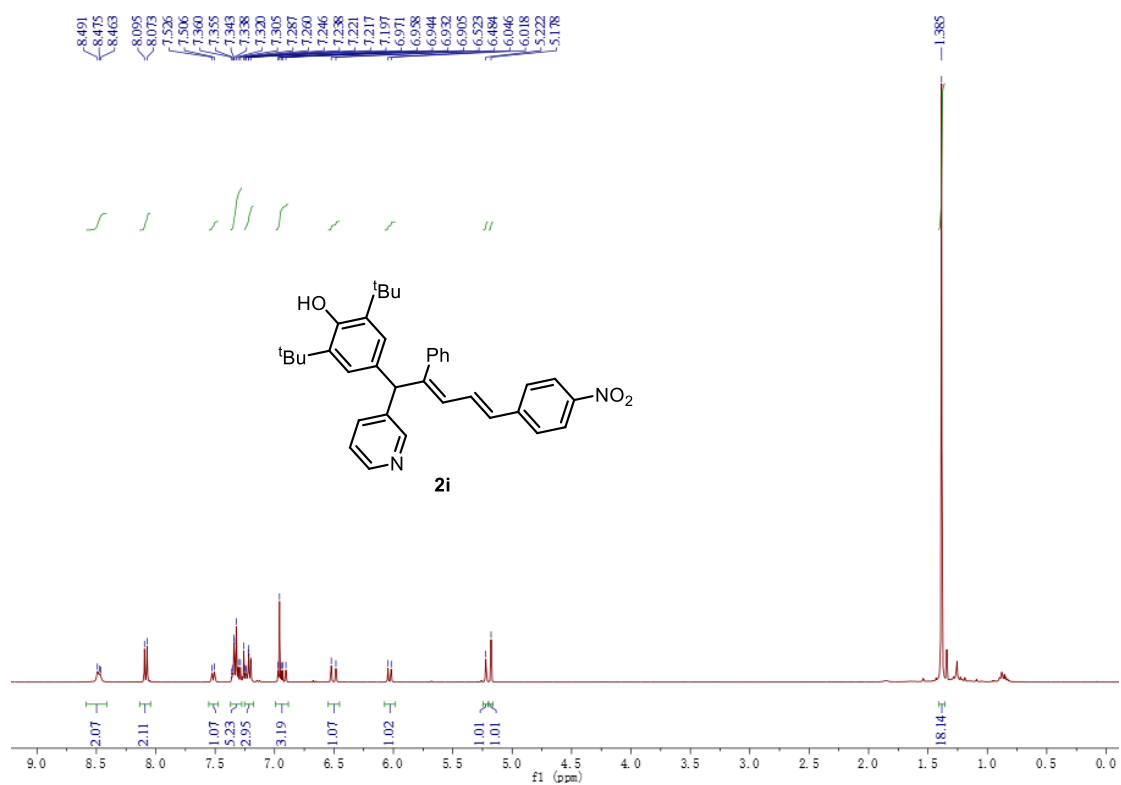

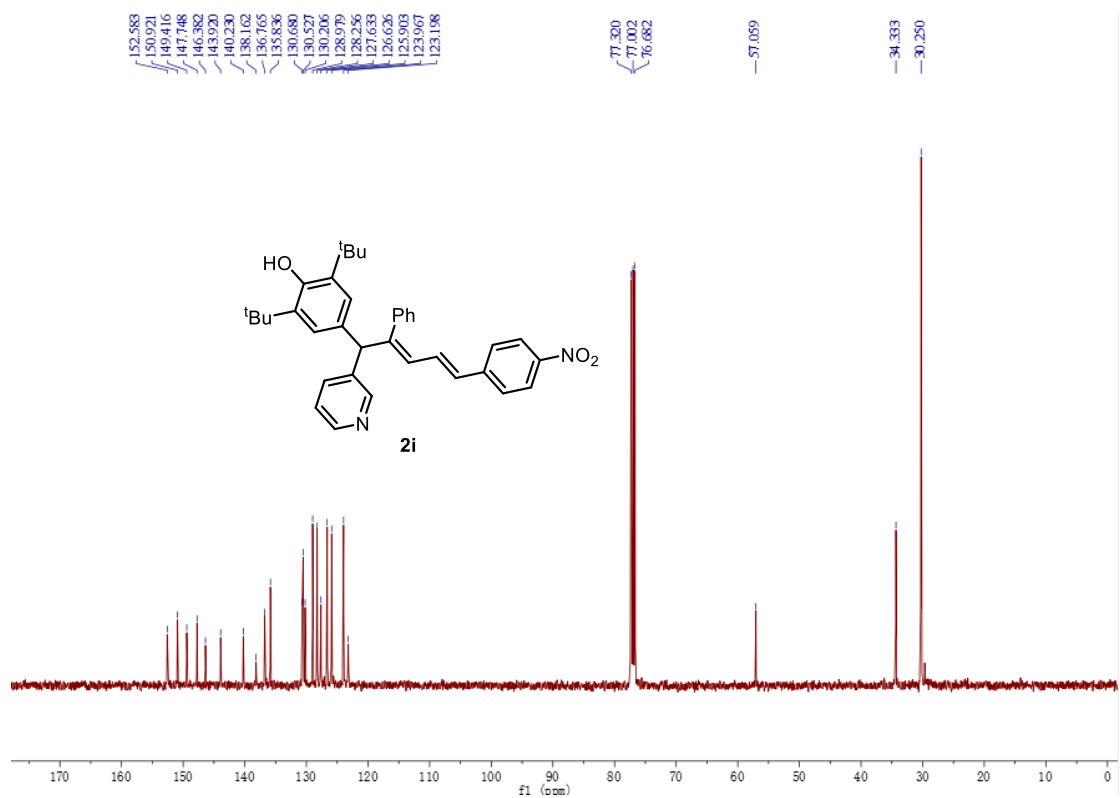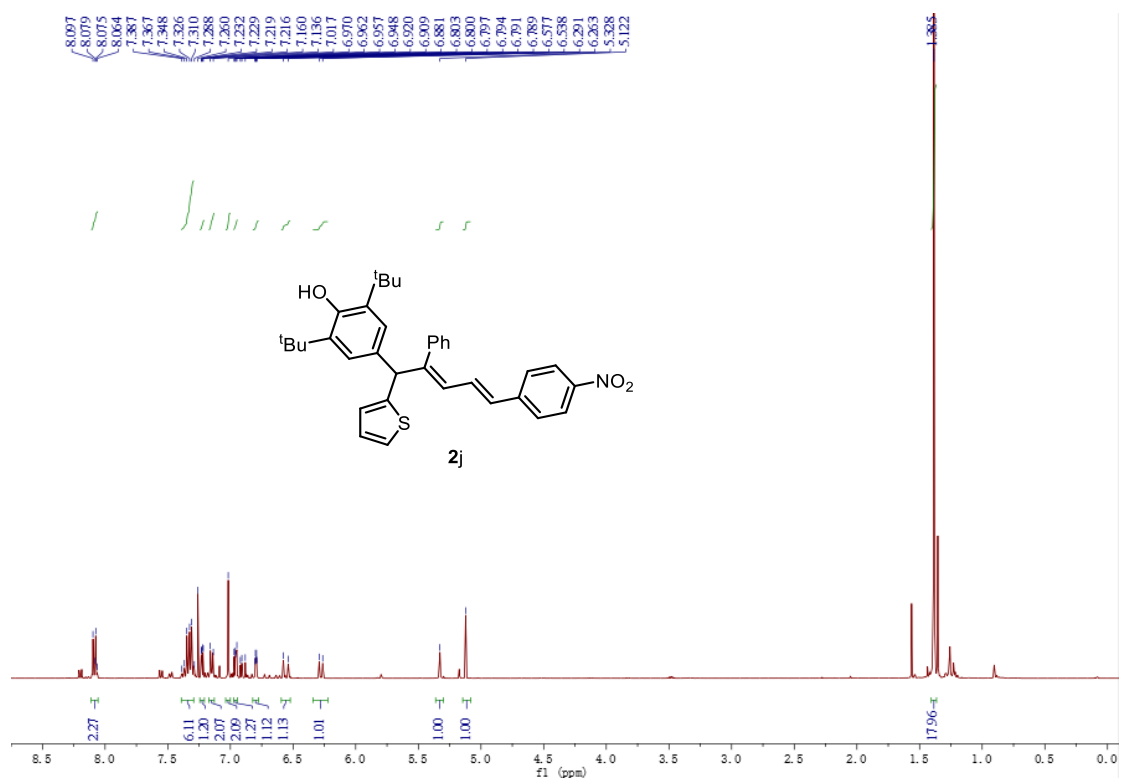

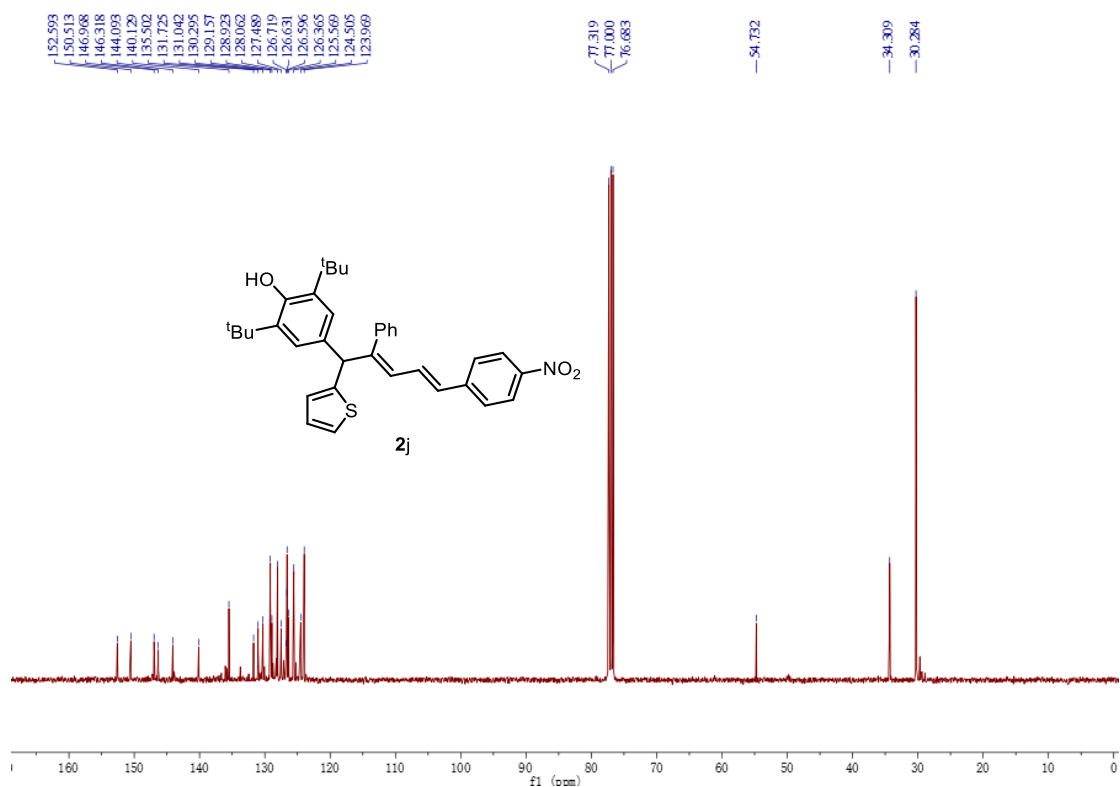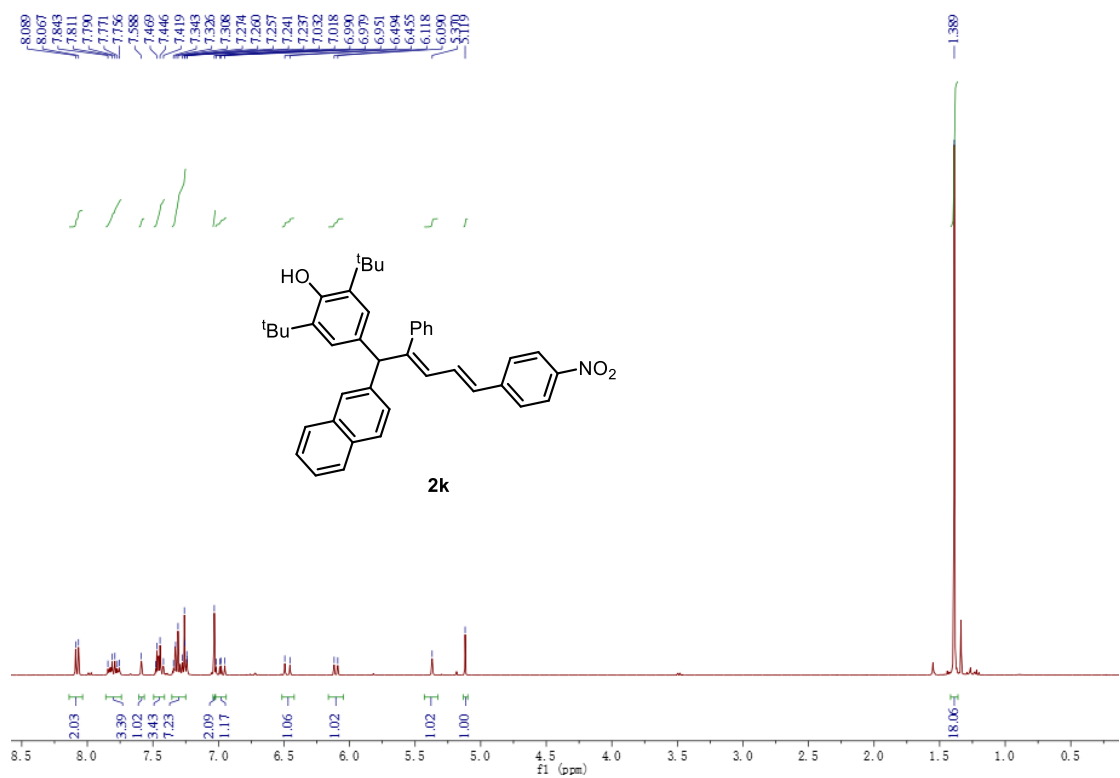

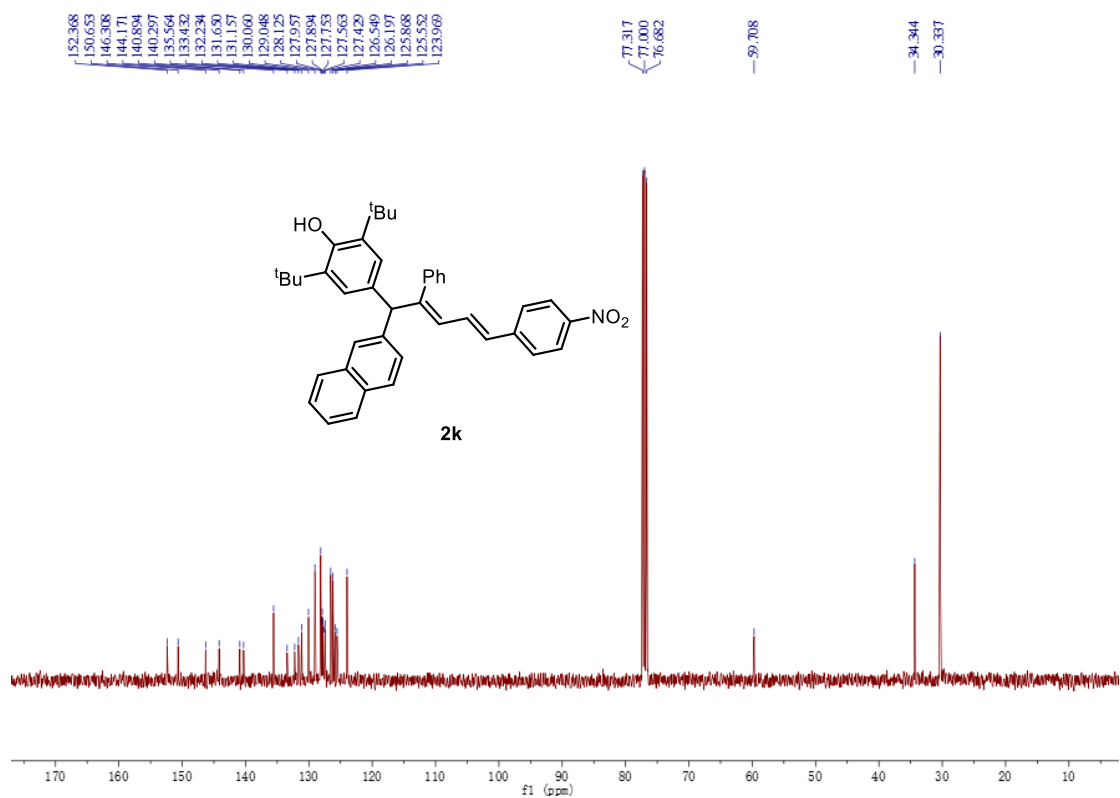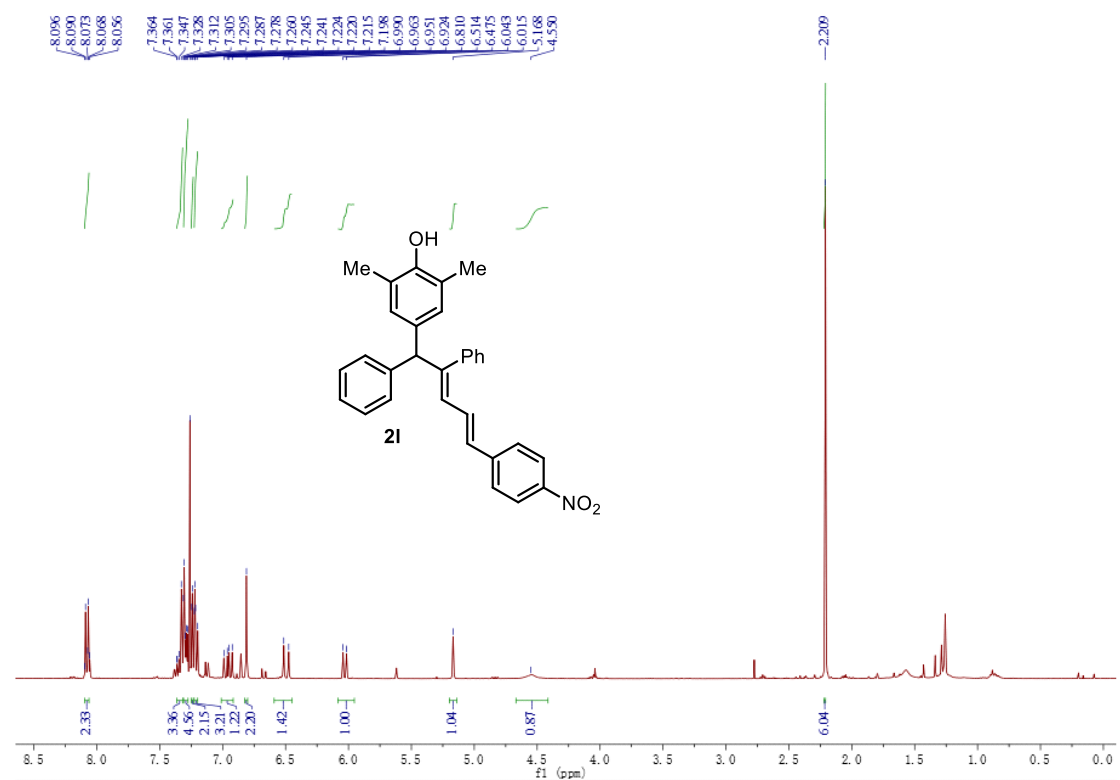

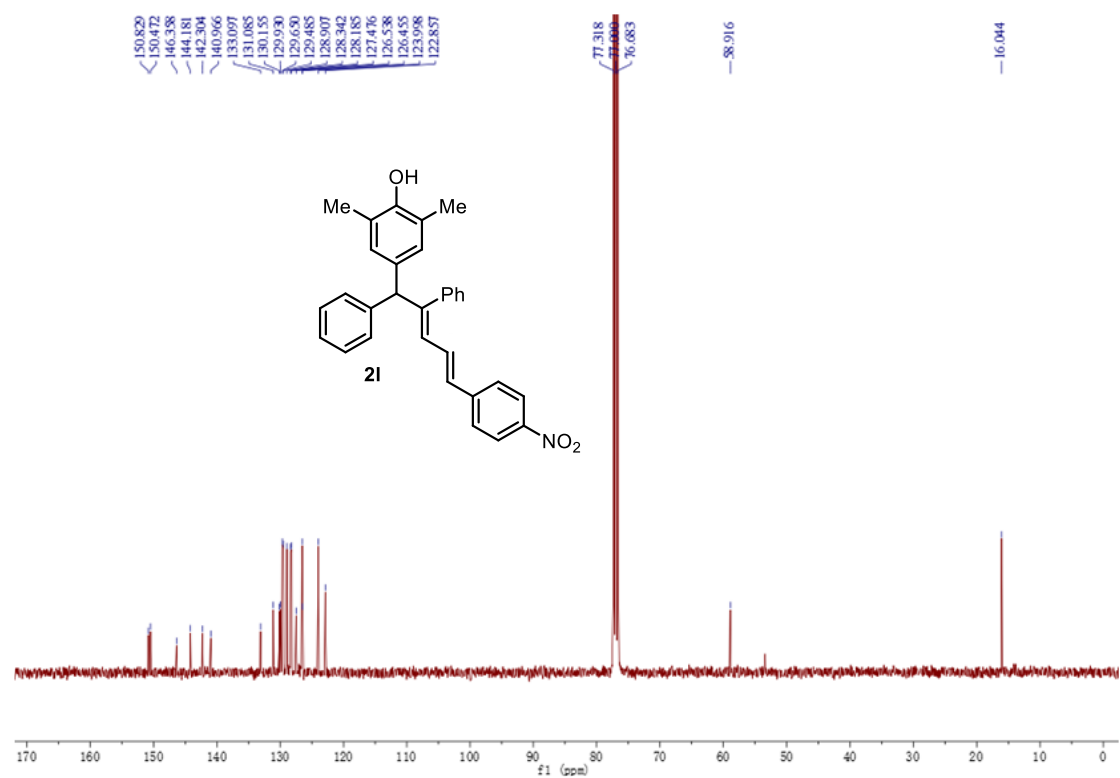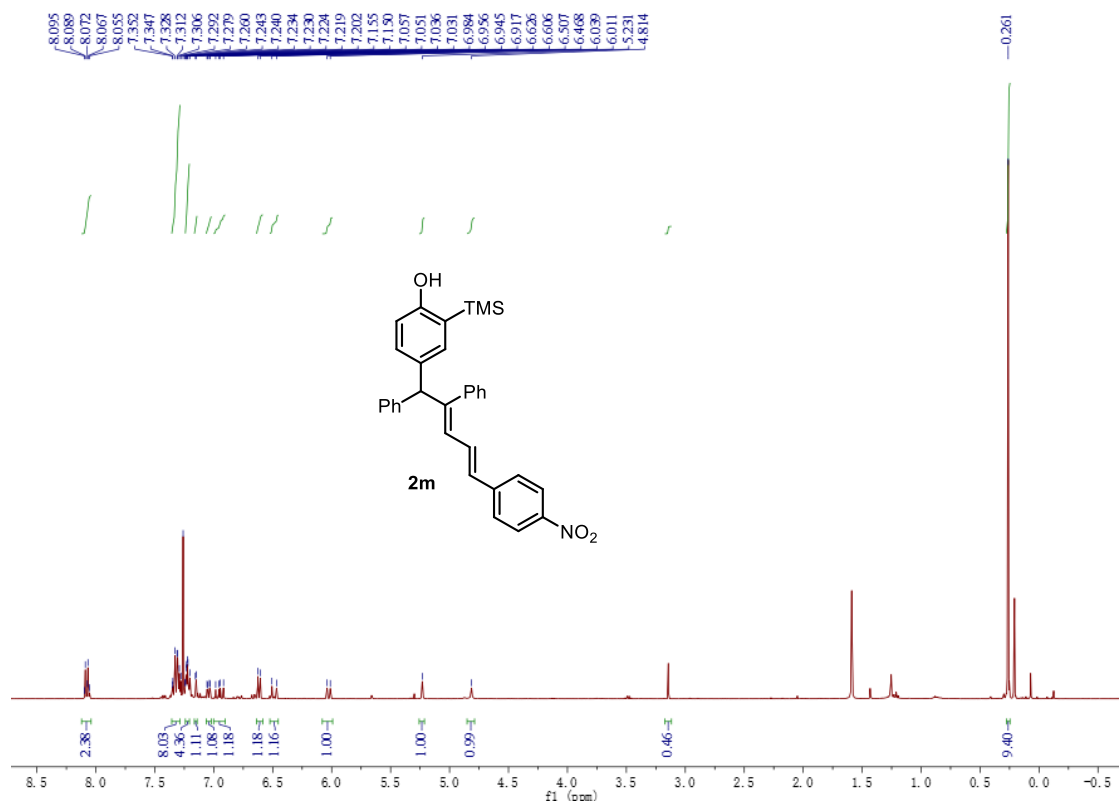



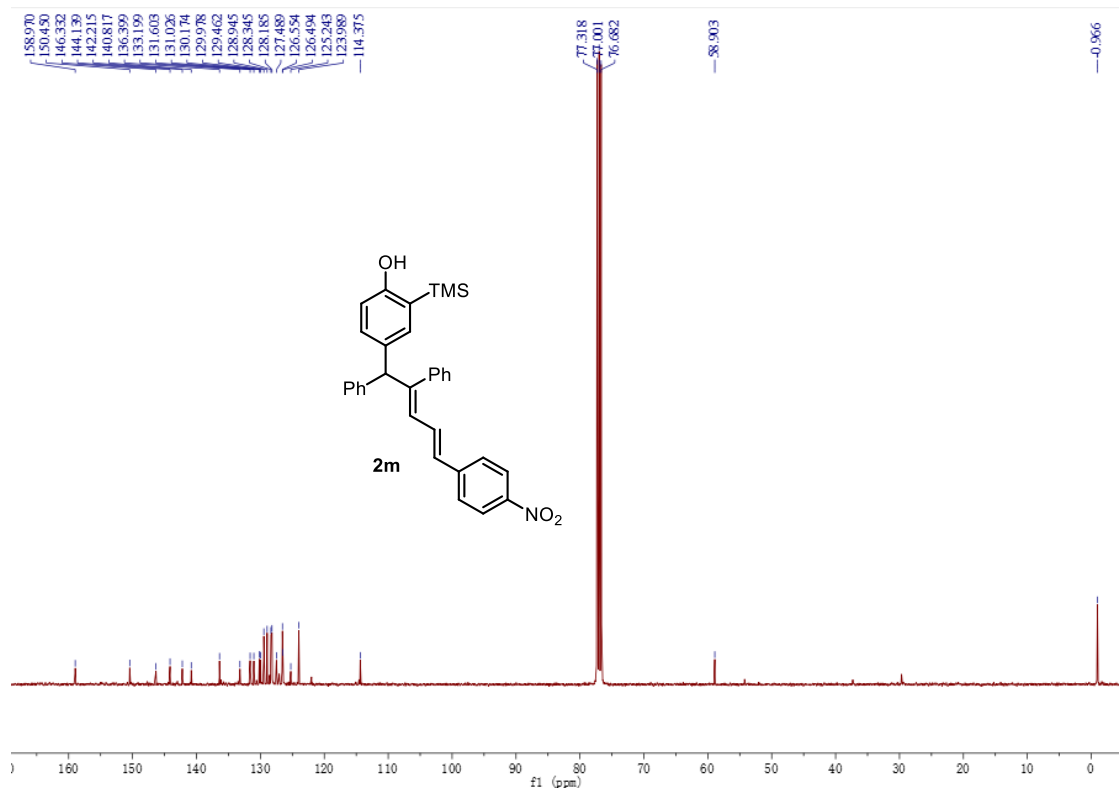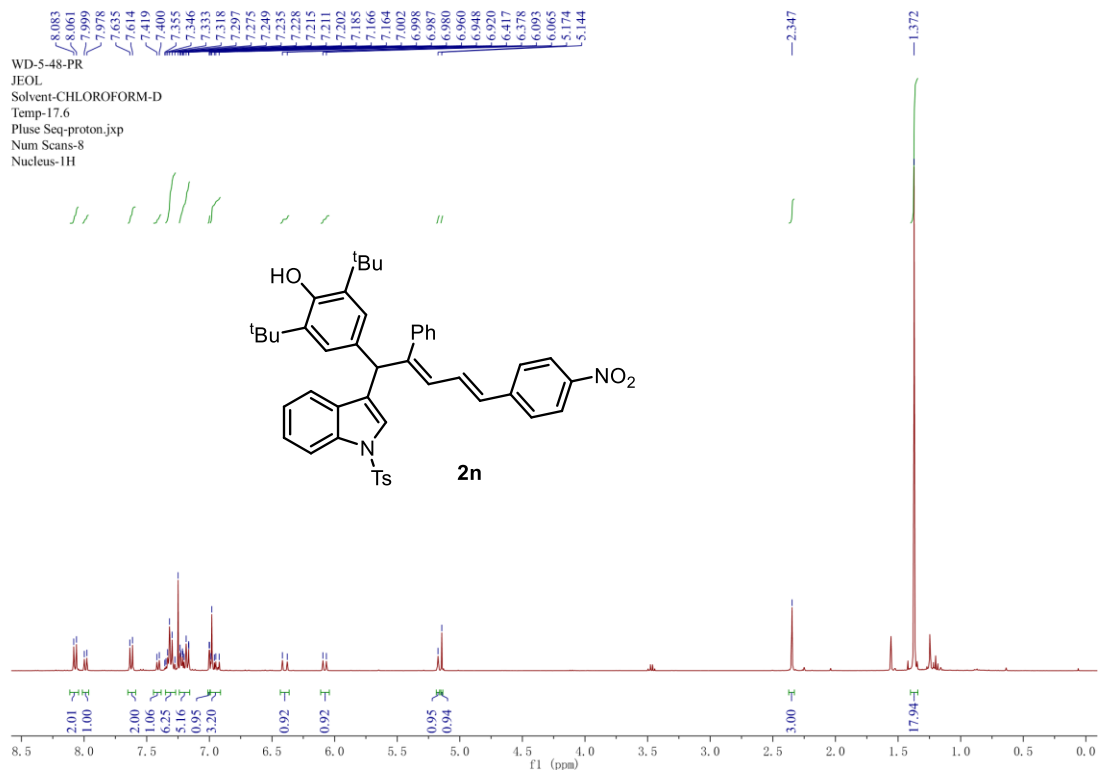

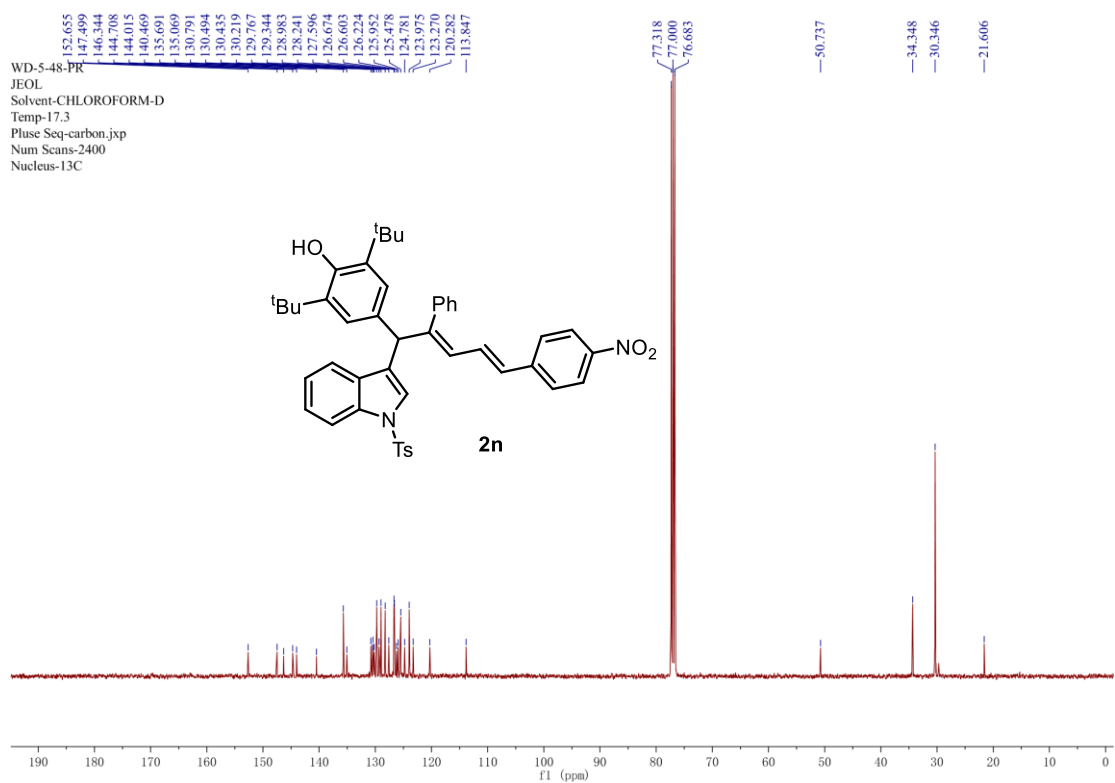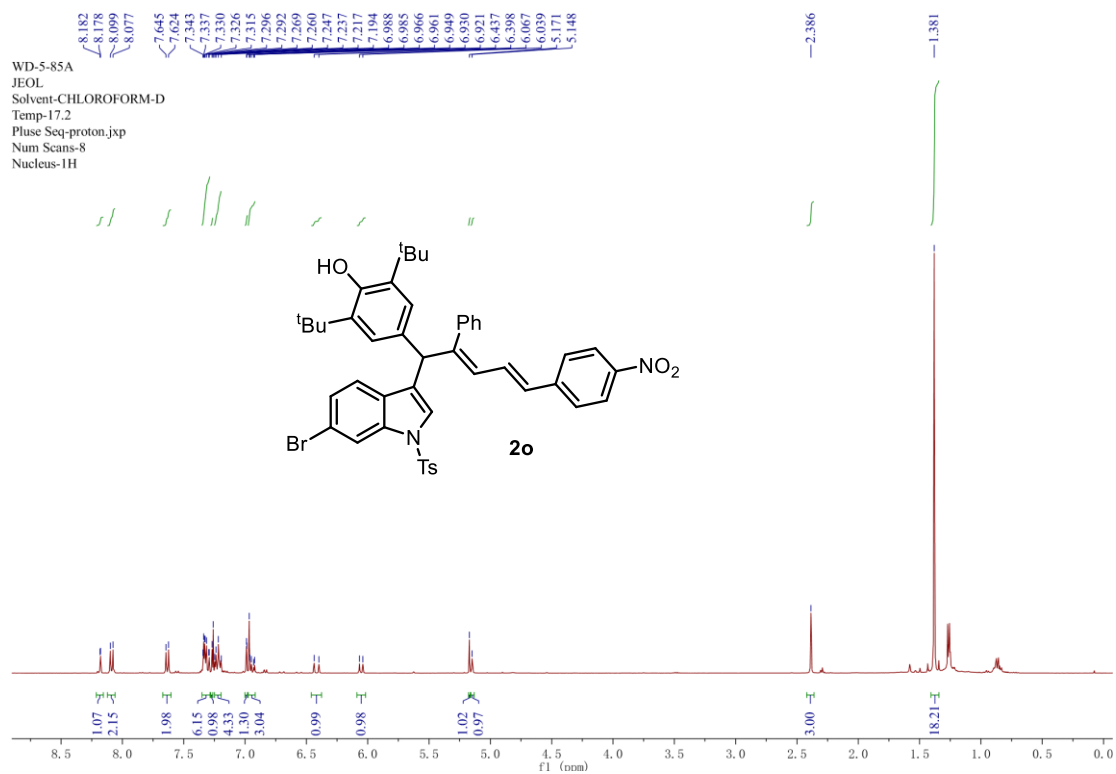

WD-5-85A  
JEOL  
Solvent-CHLOROFORM-D  
Temp-17.2  
Pulse Seq-carbon.jxp  
Num Scans-600  
Nucleus-13C

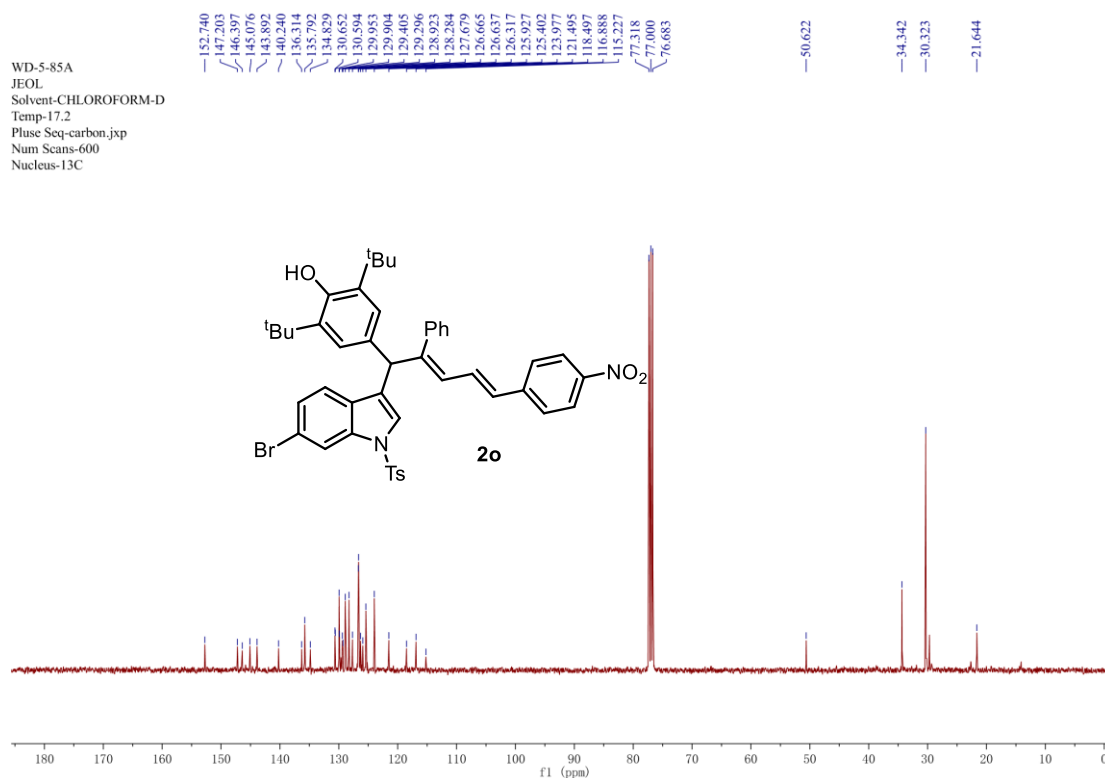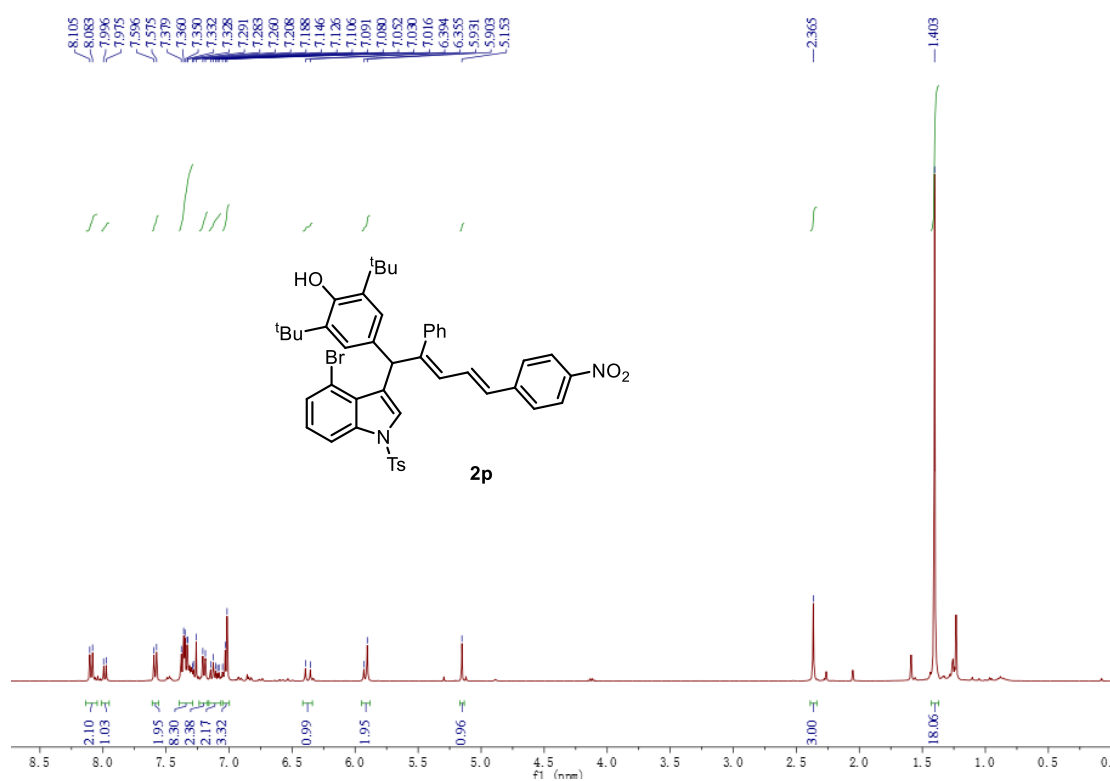

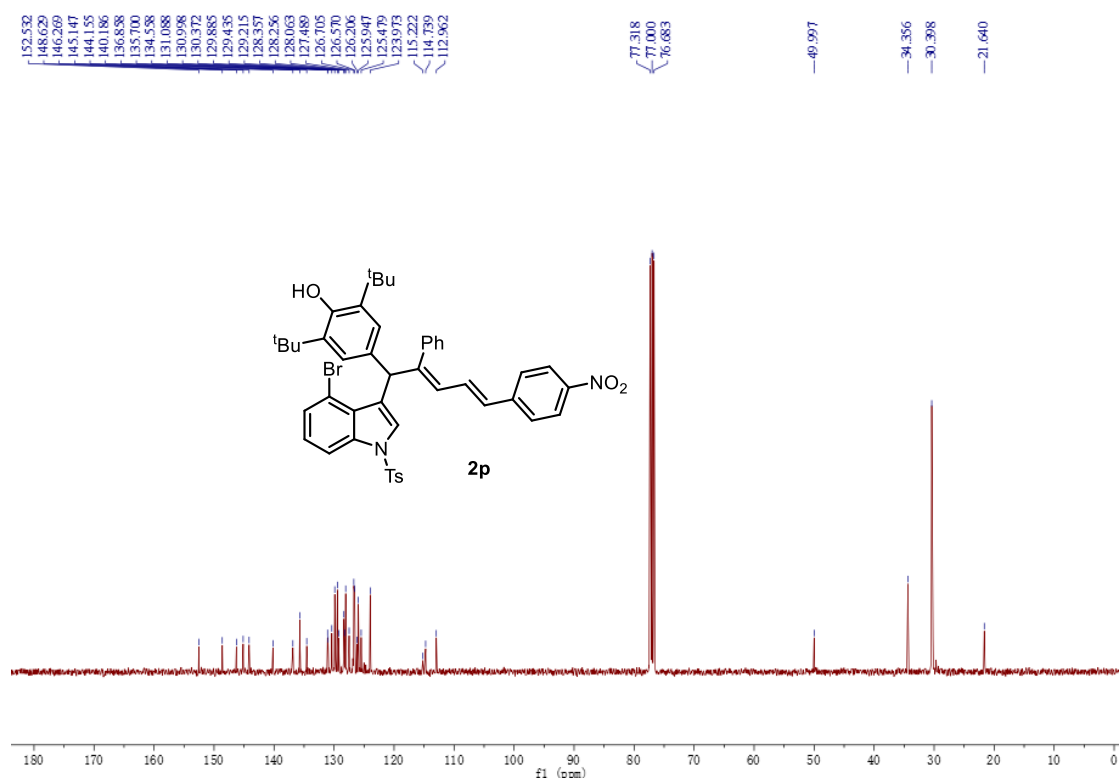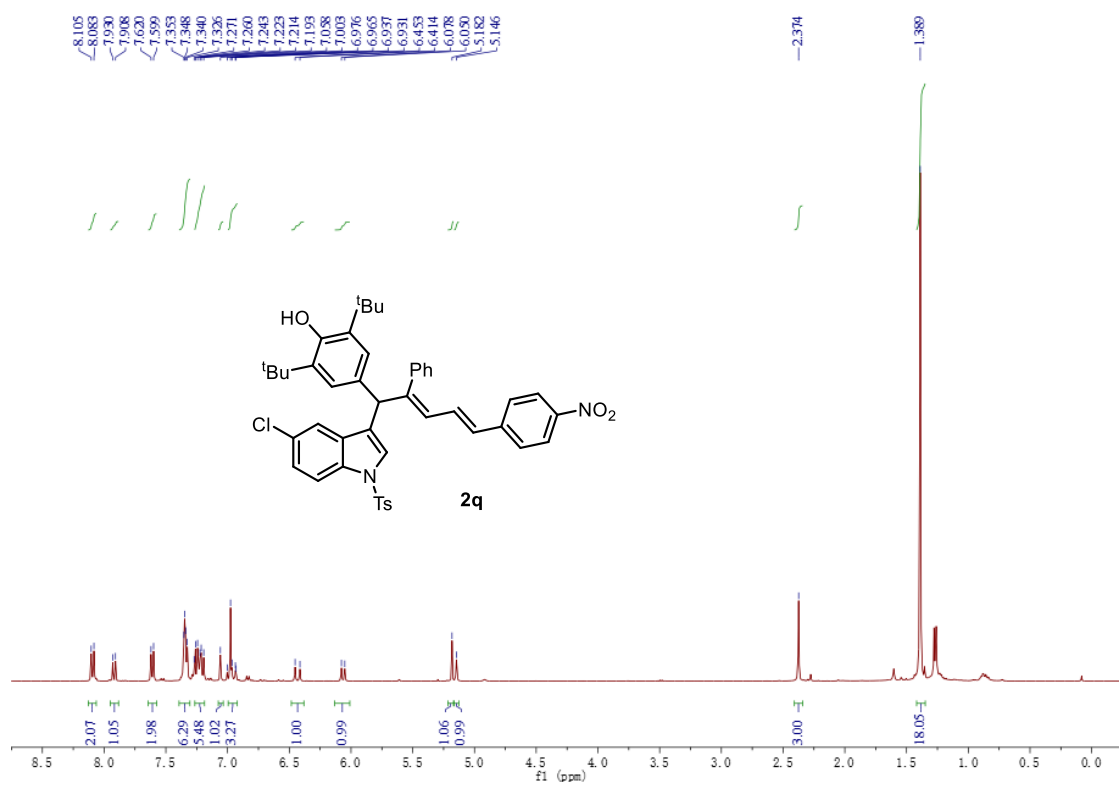

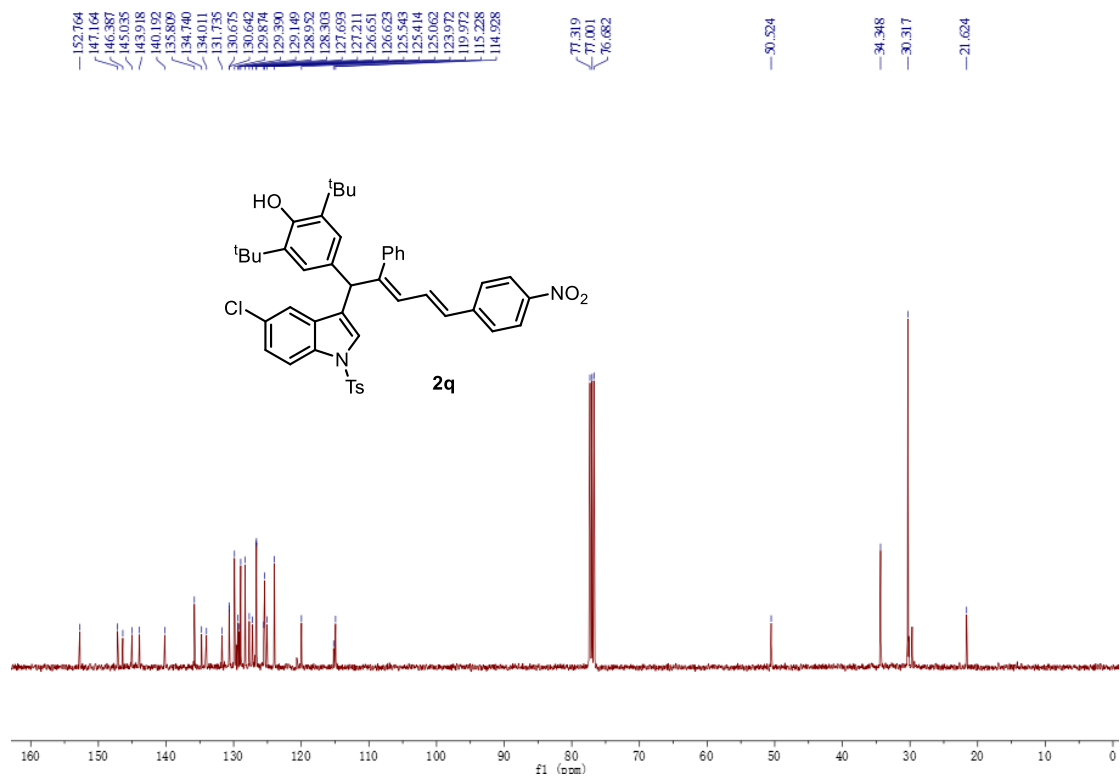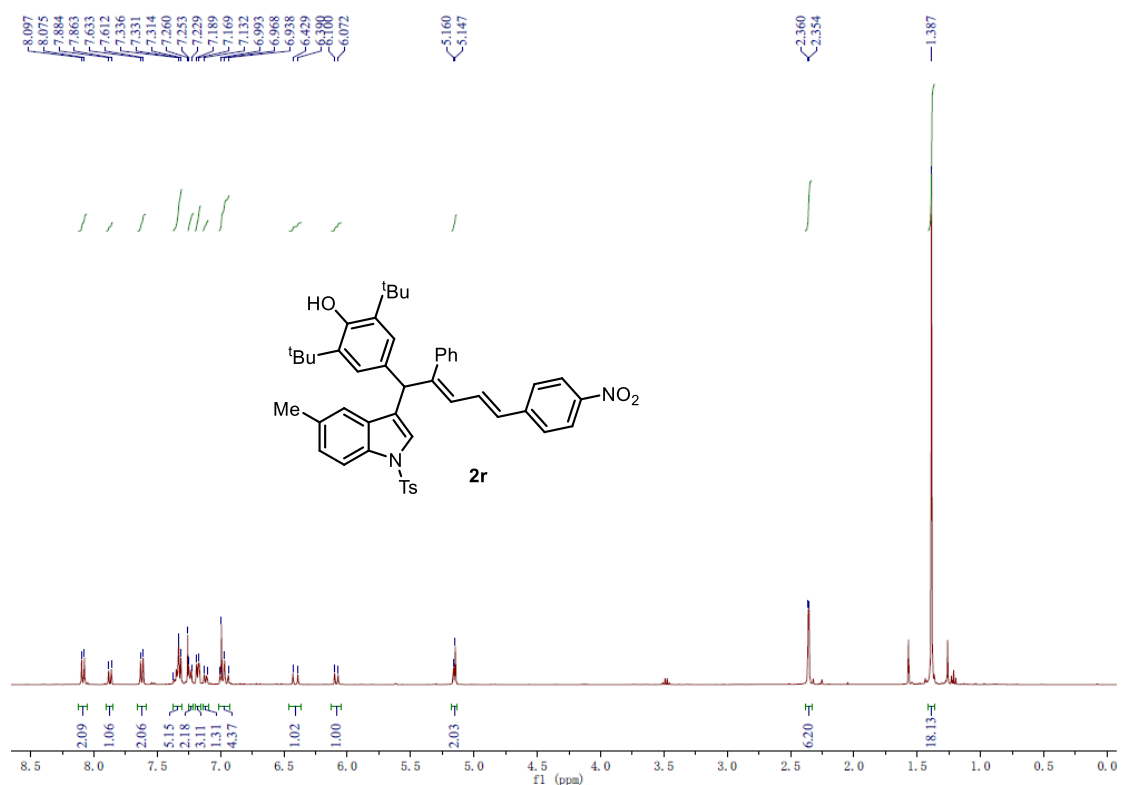

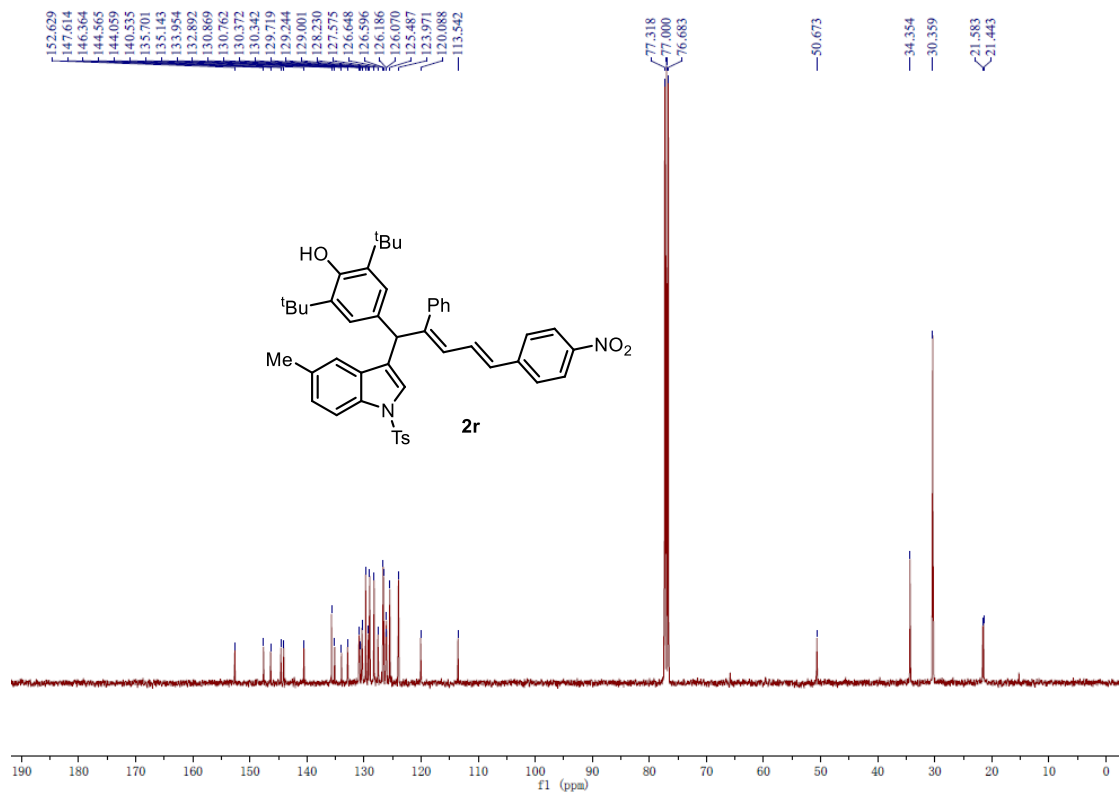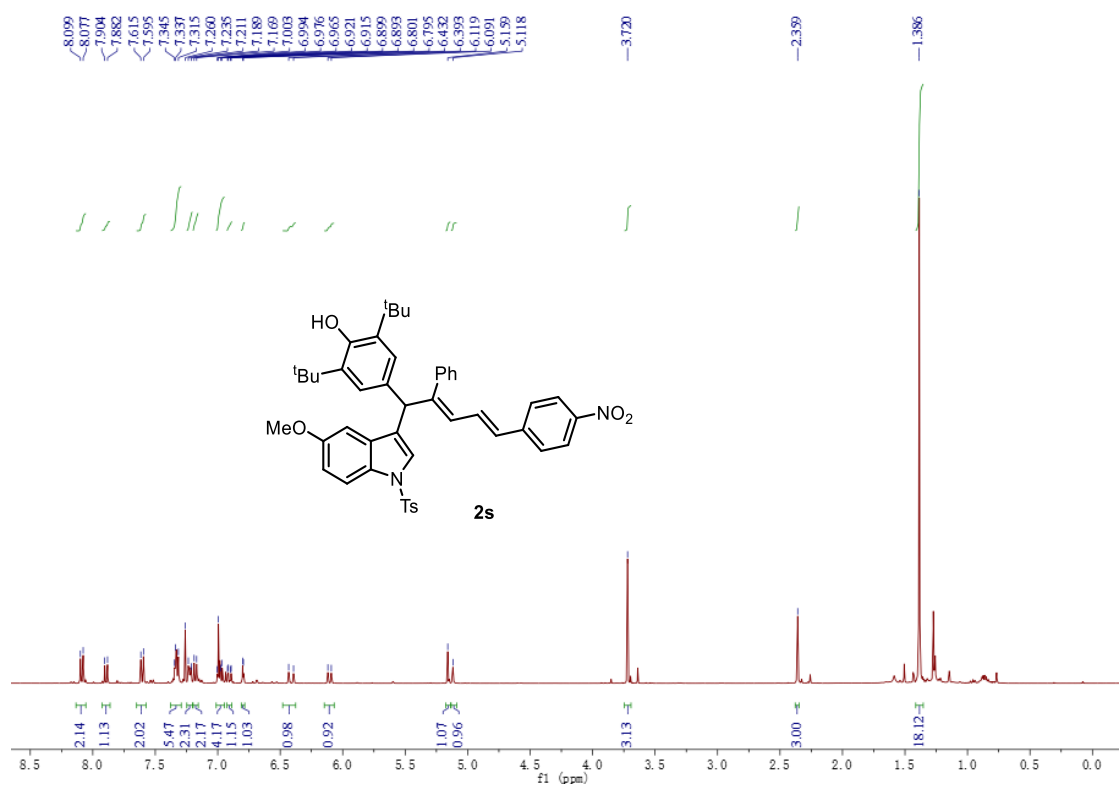

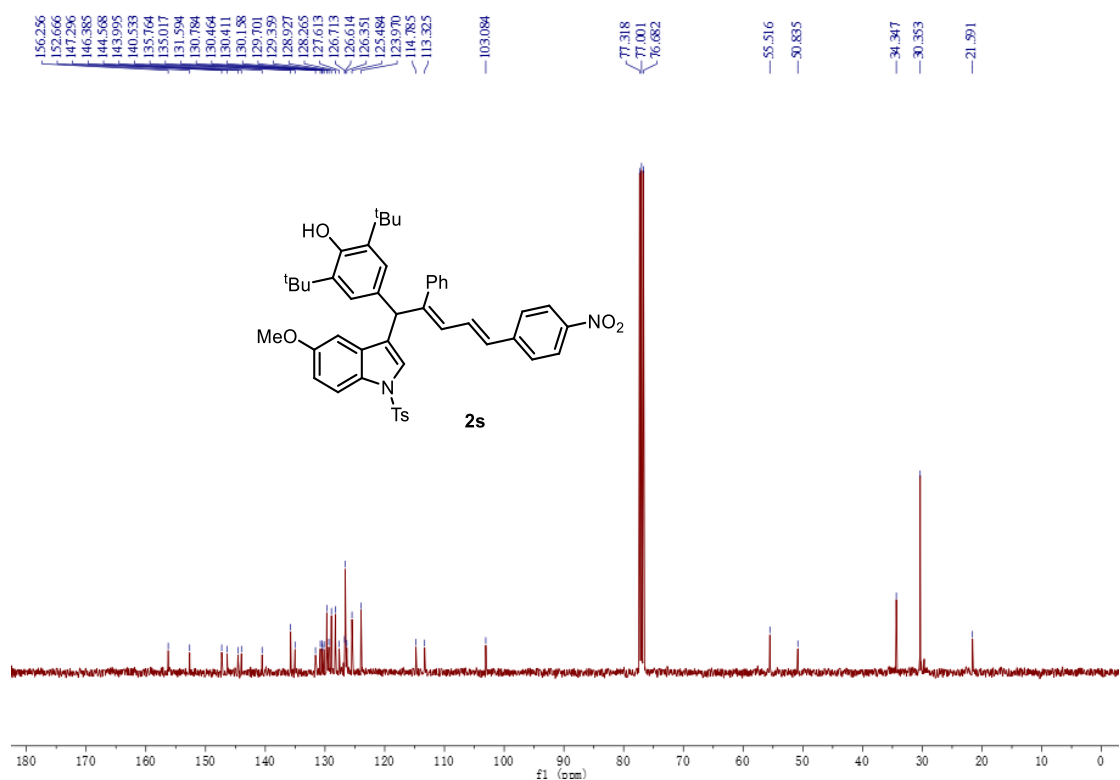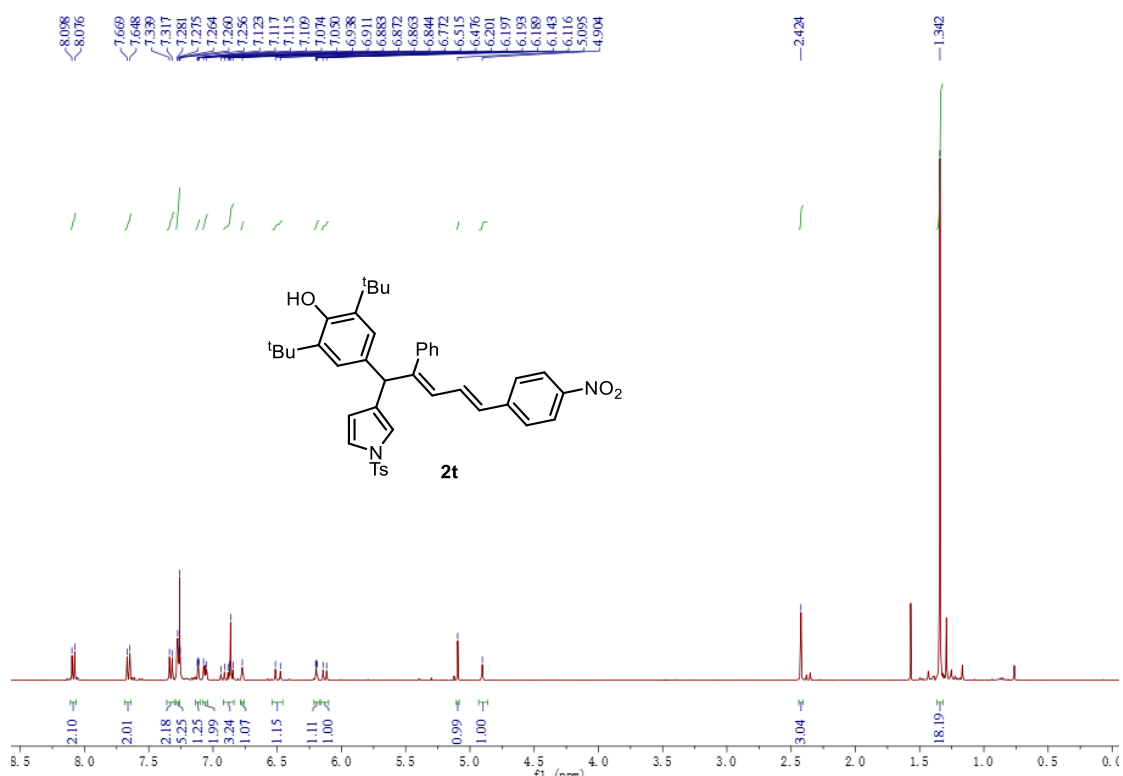

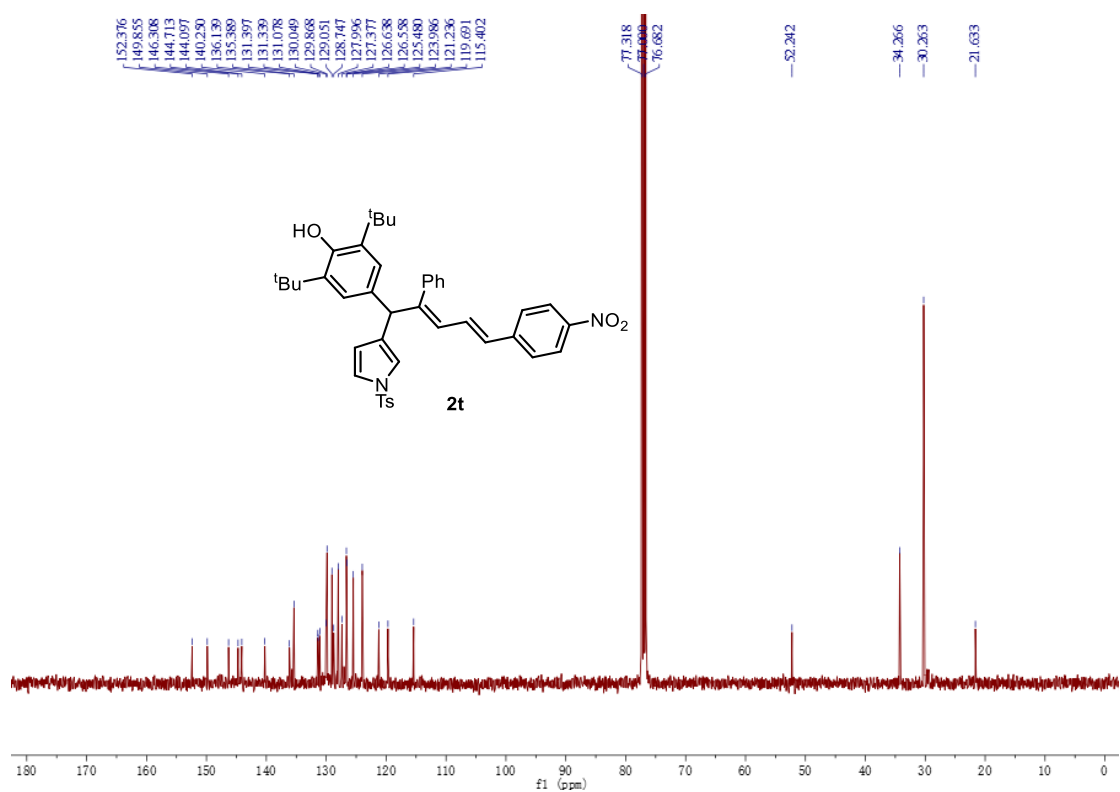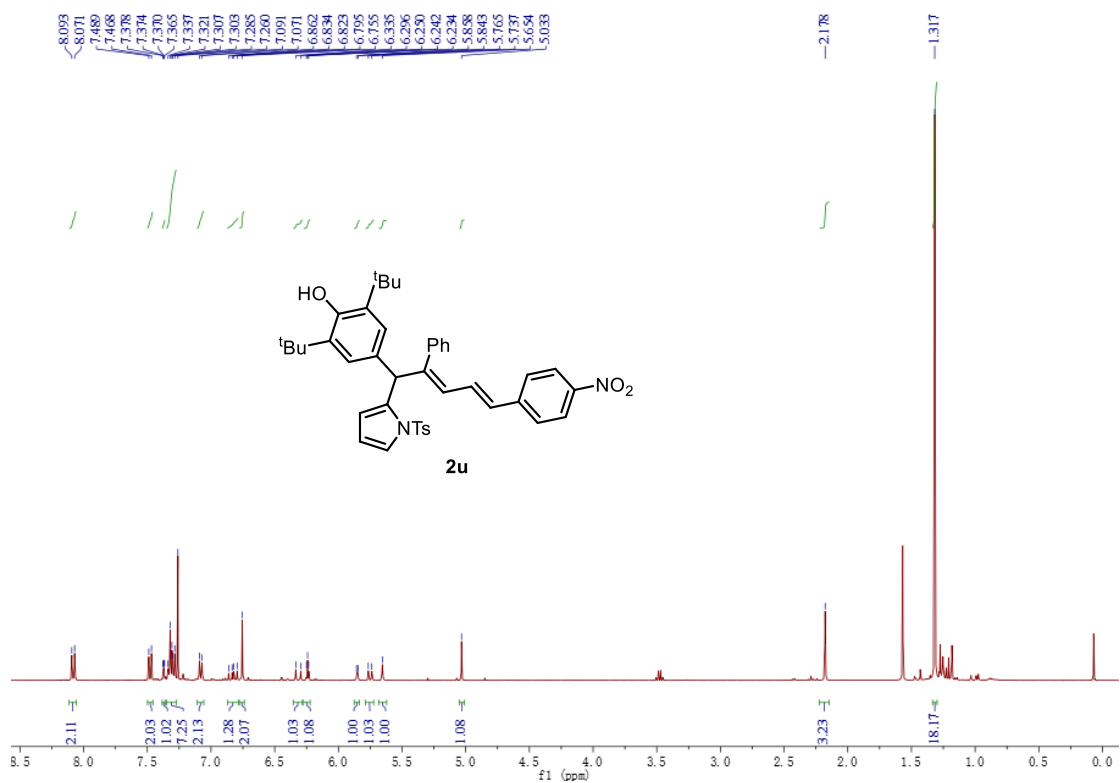



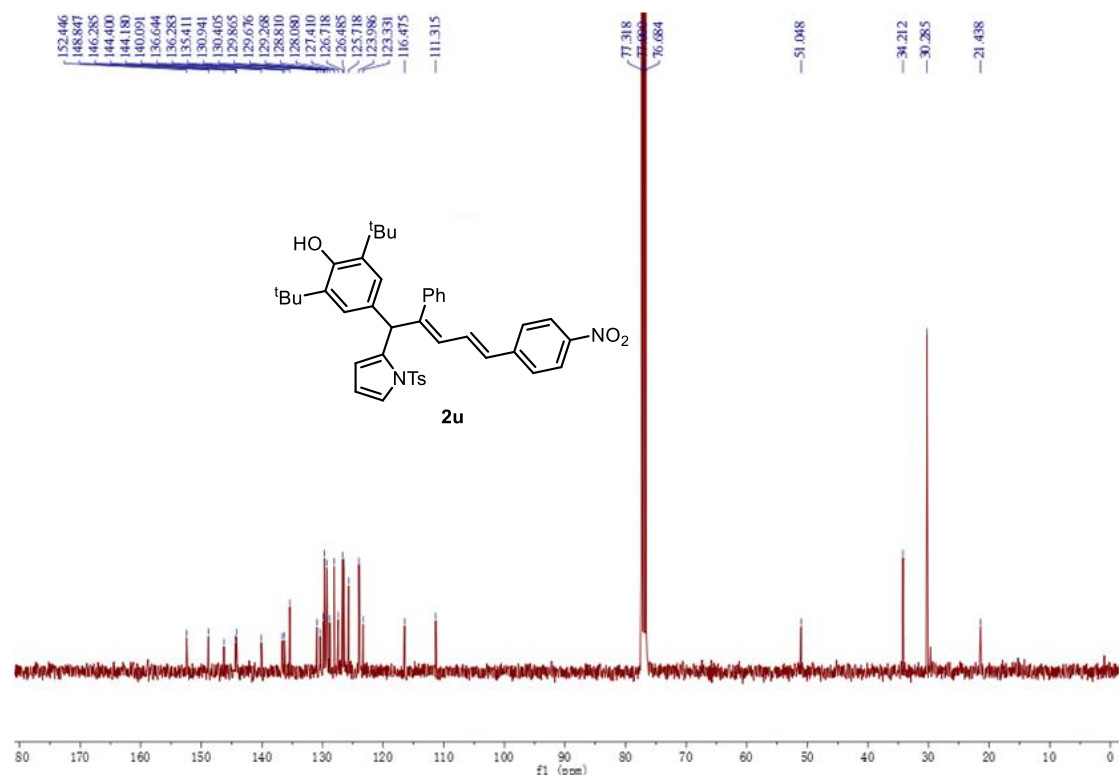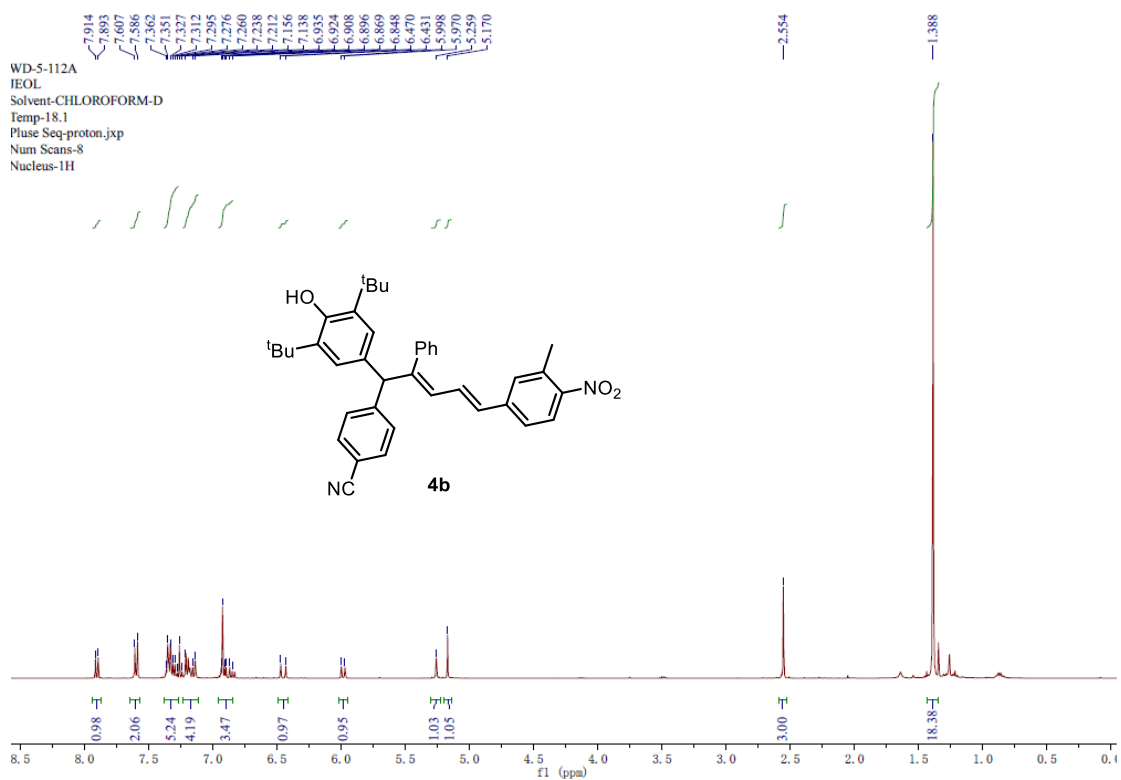

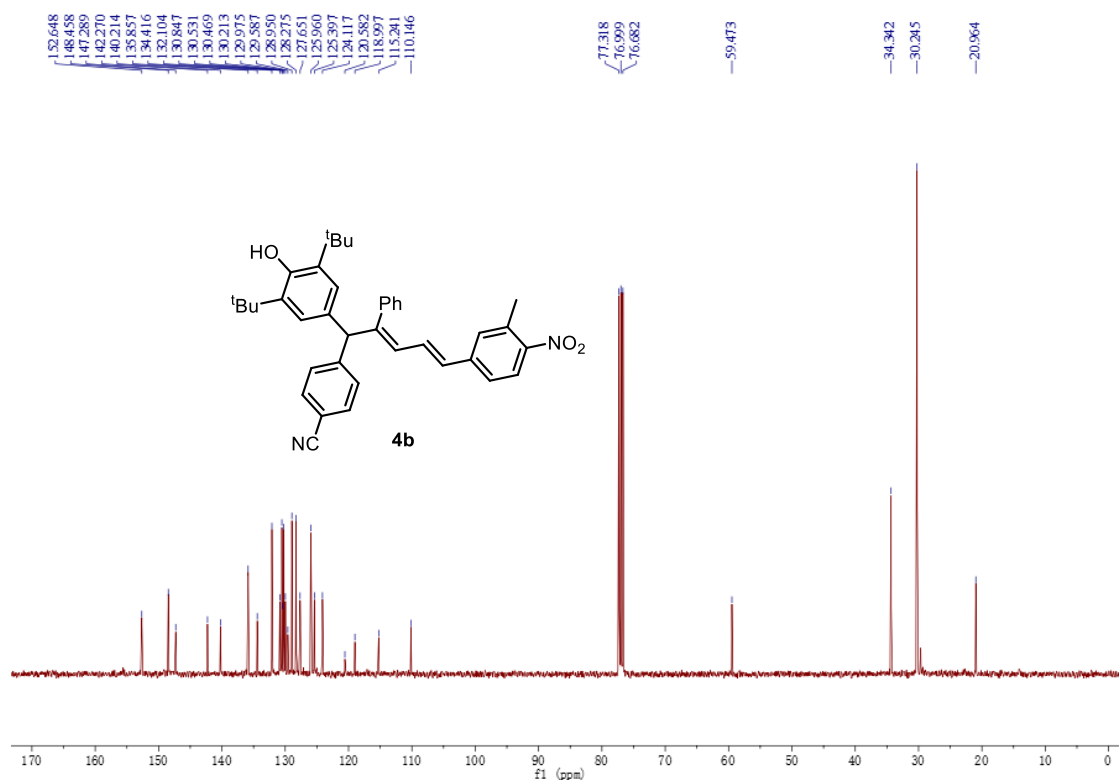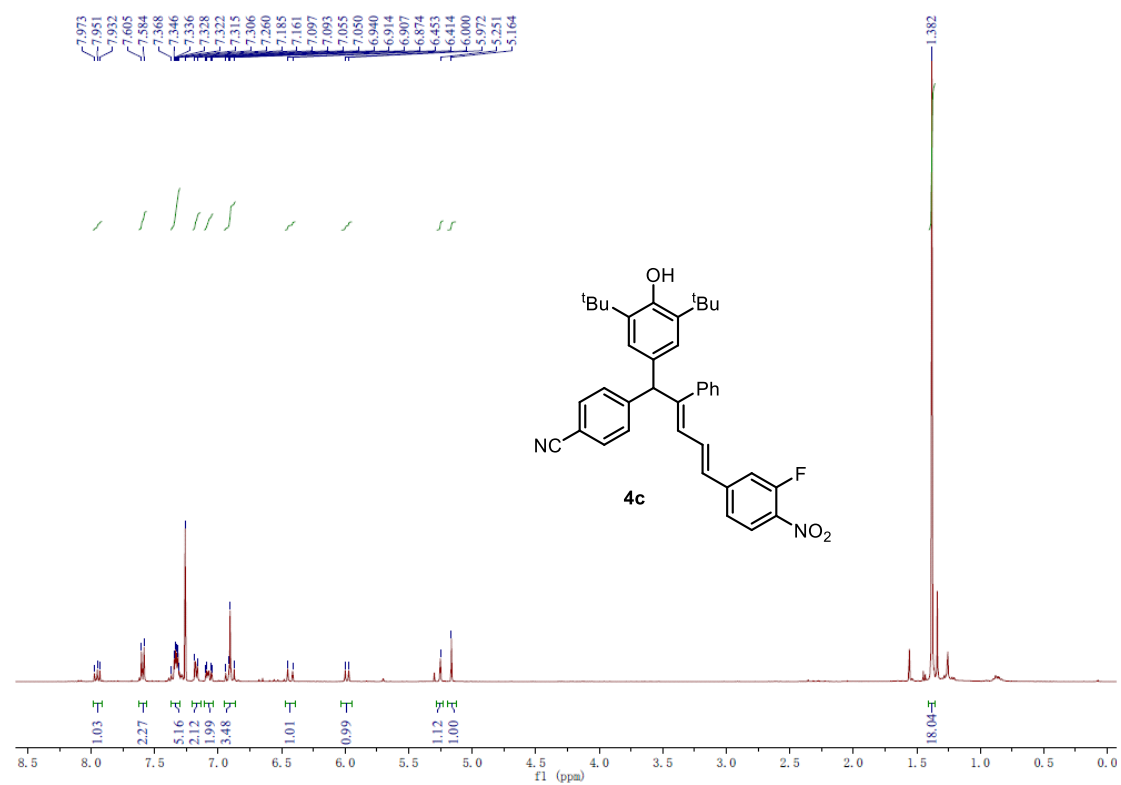

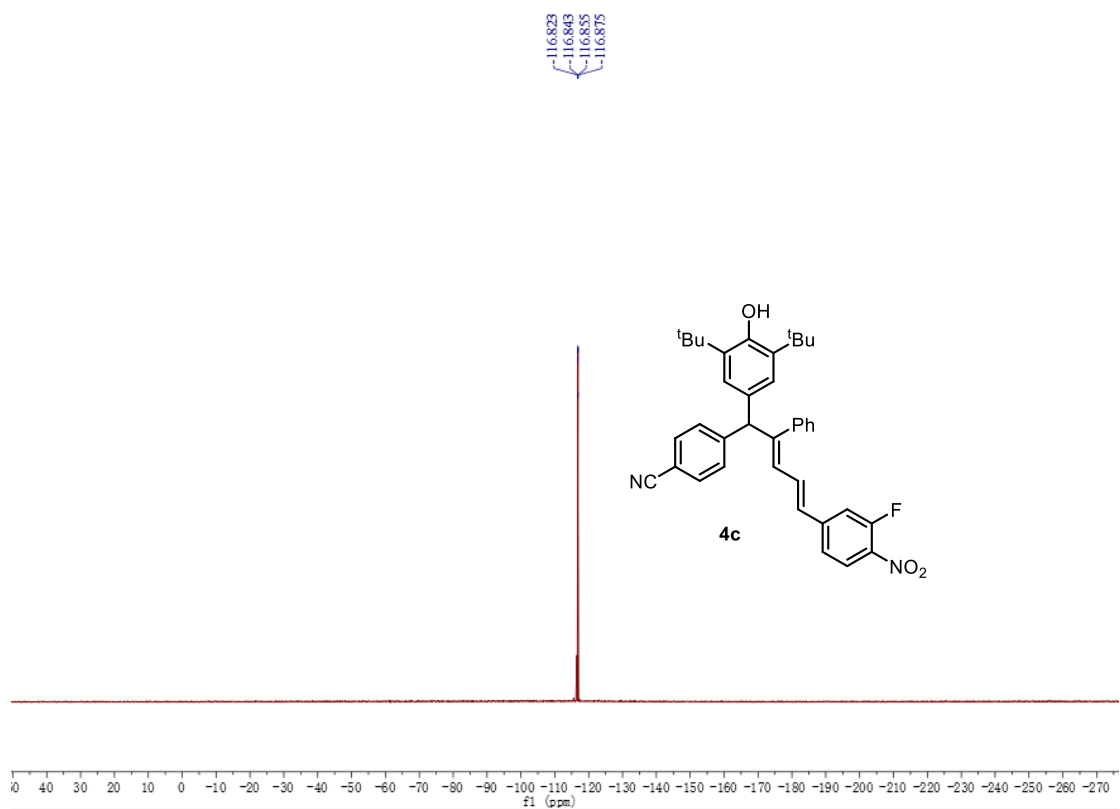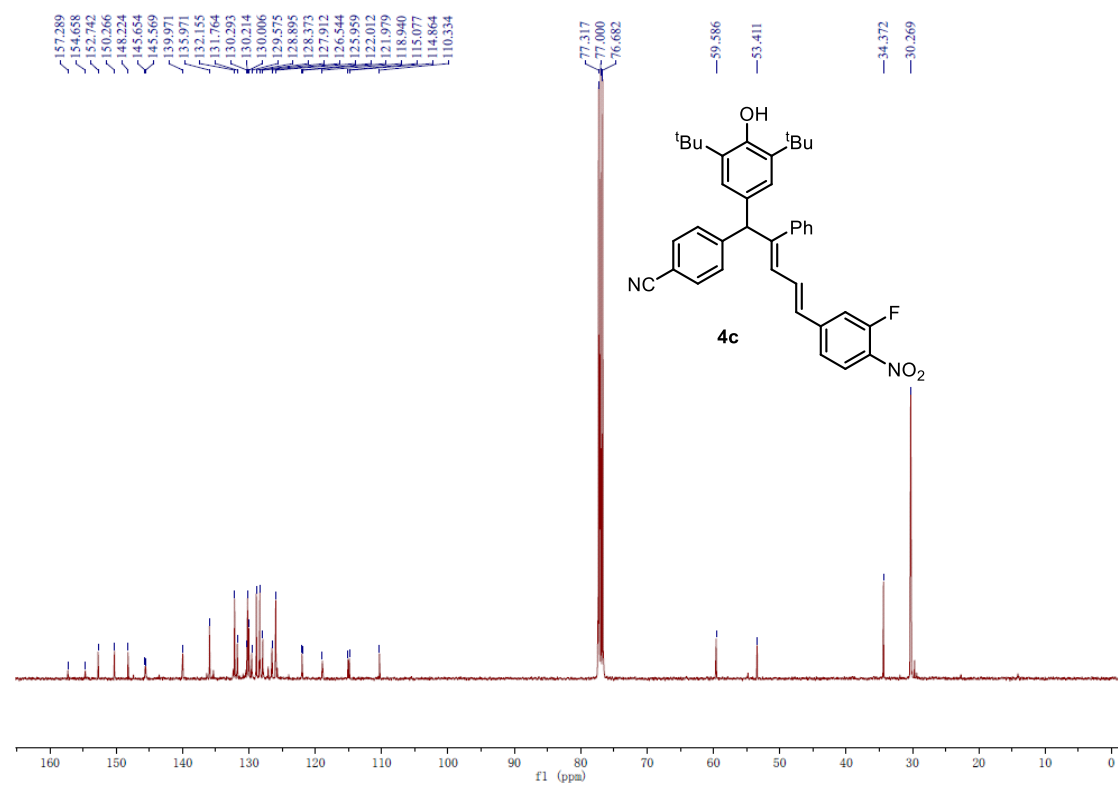

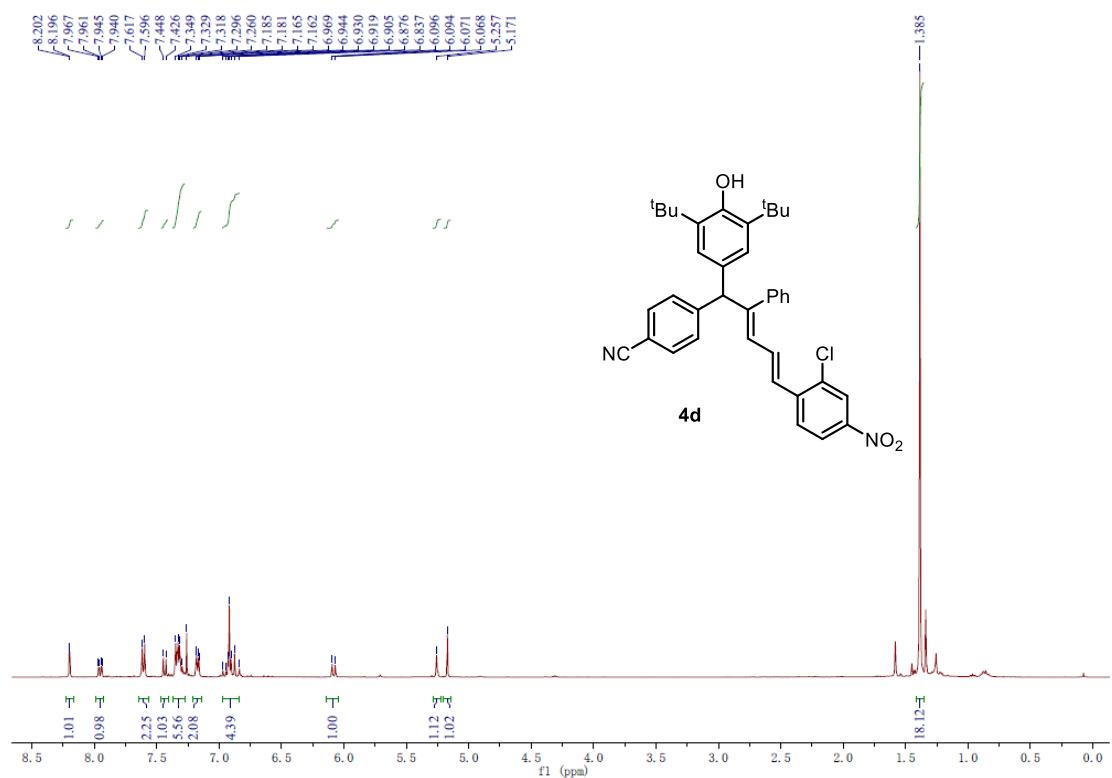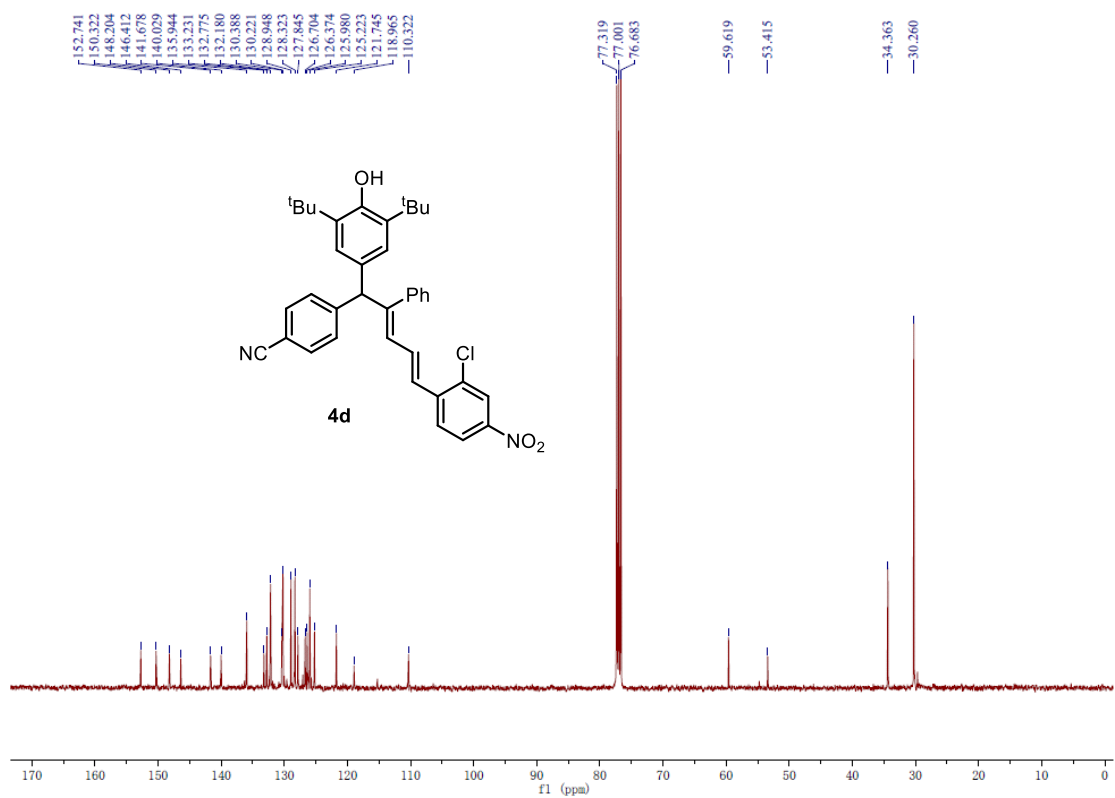

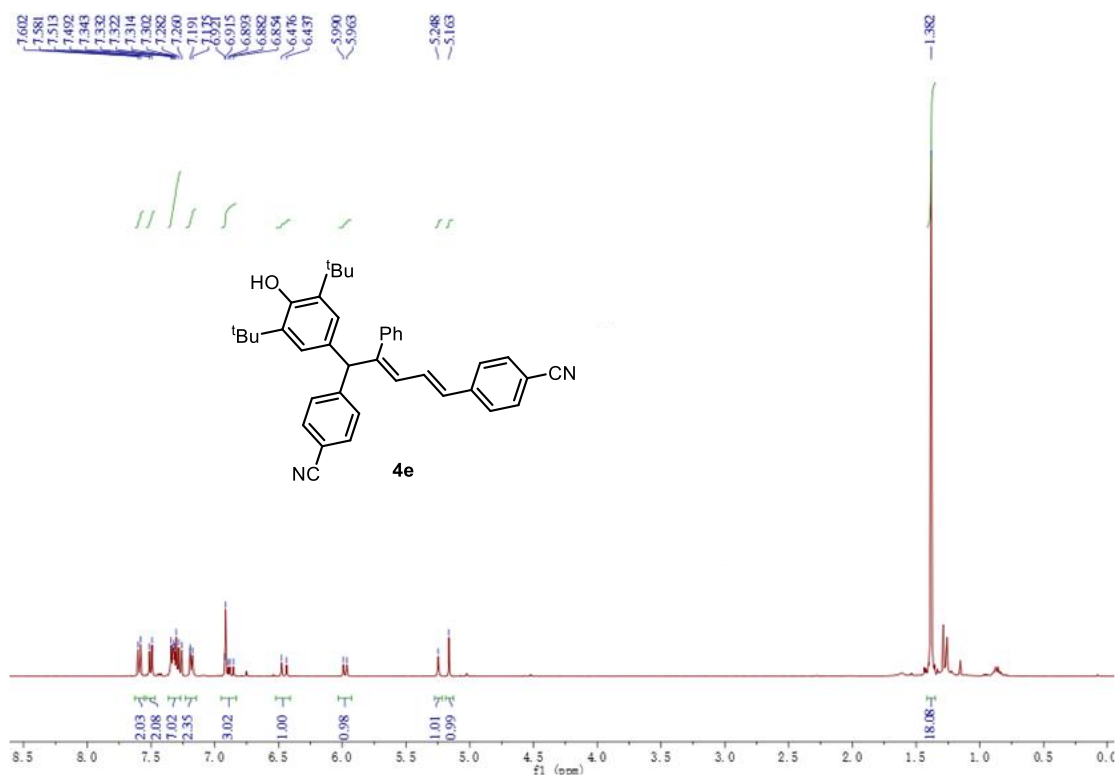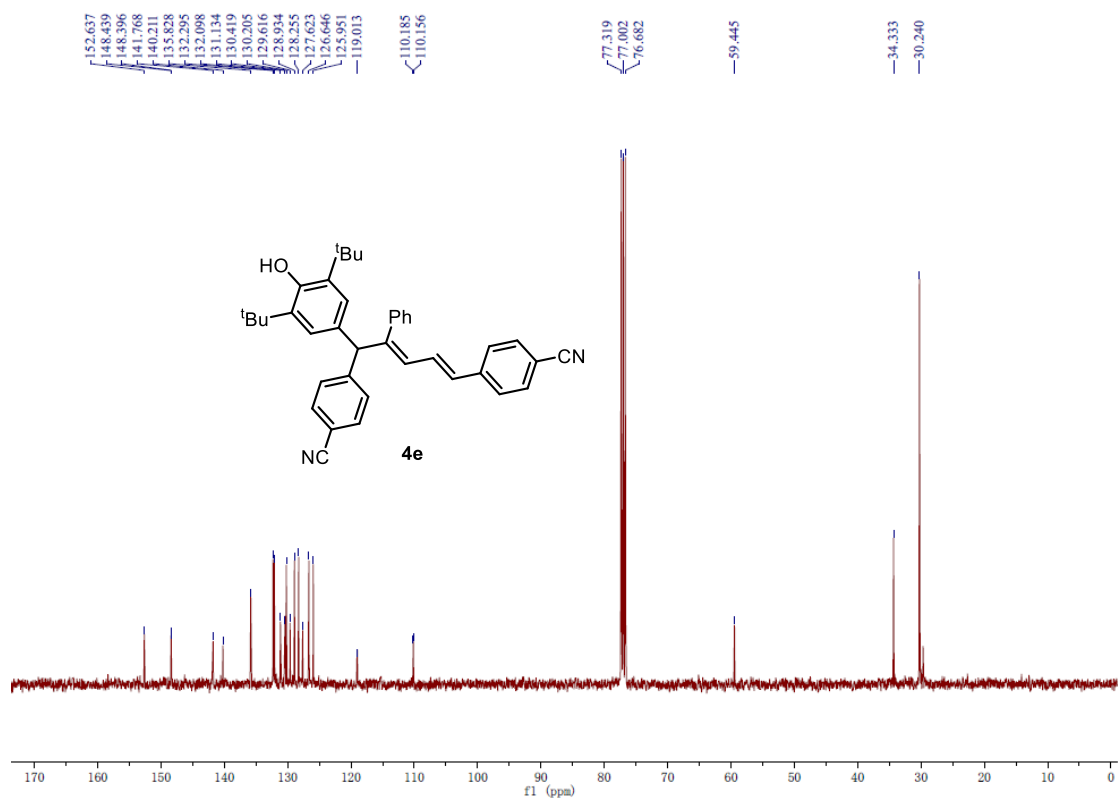

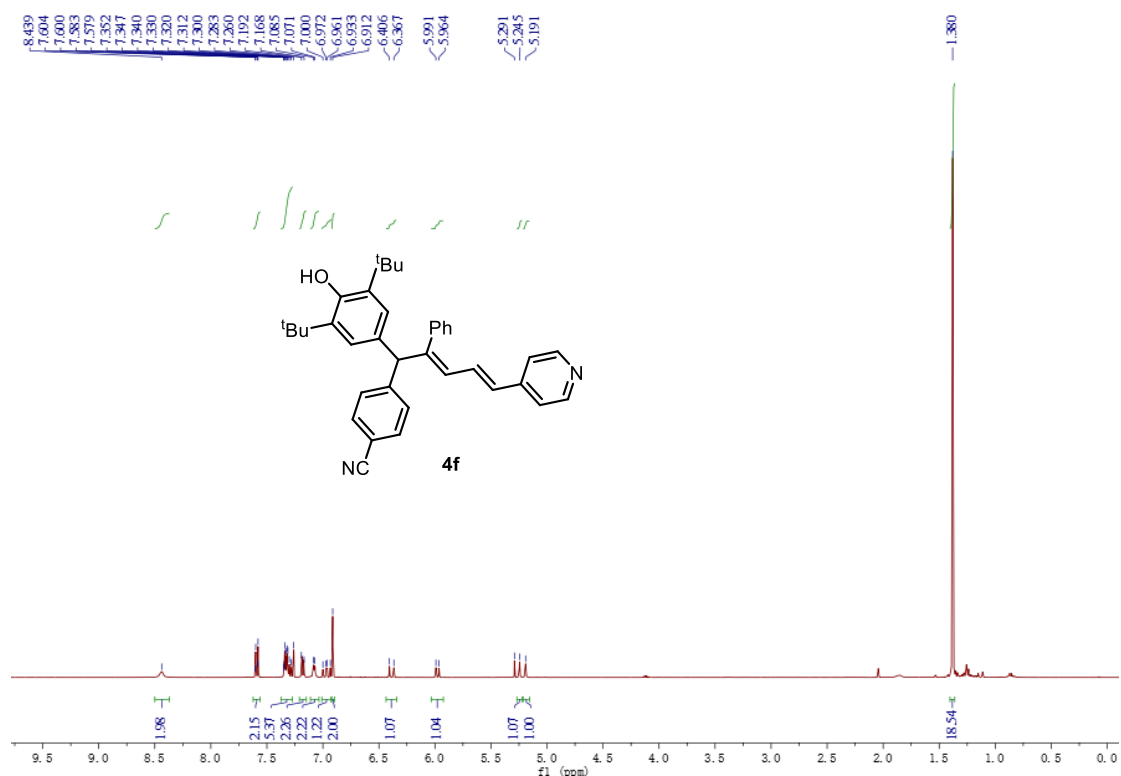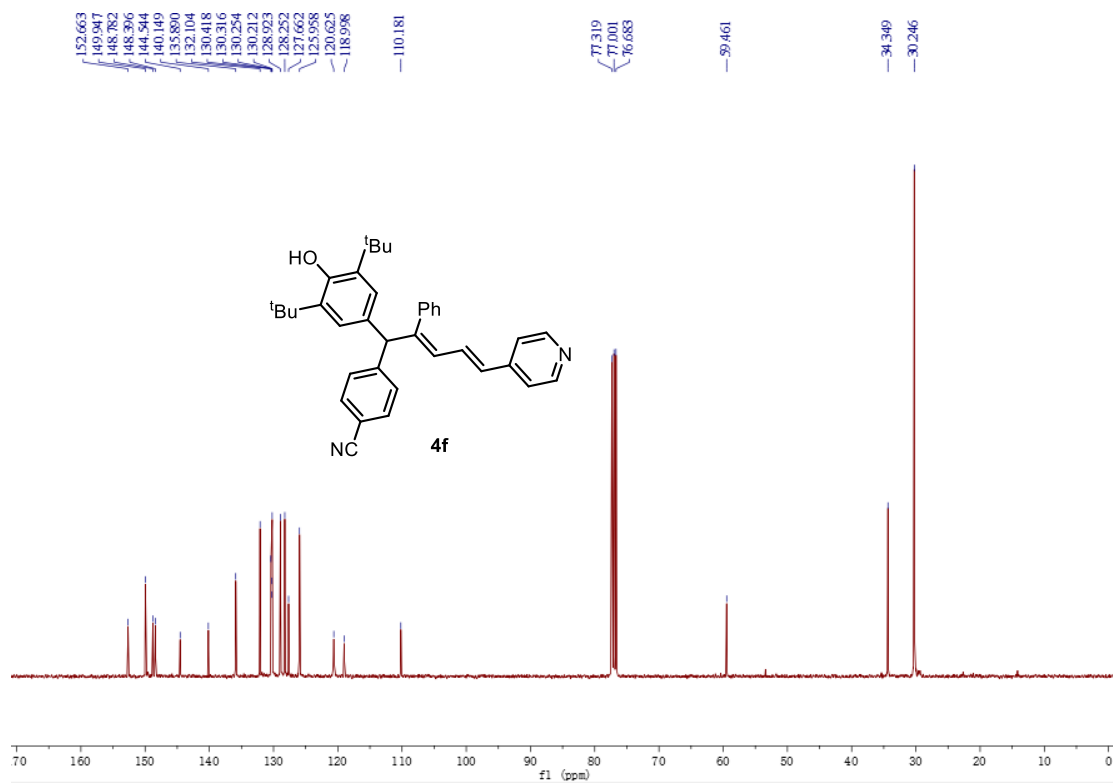

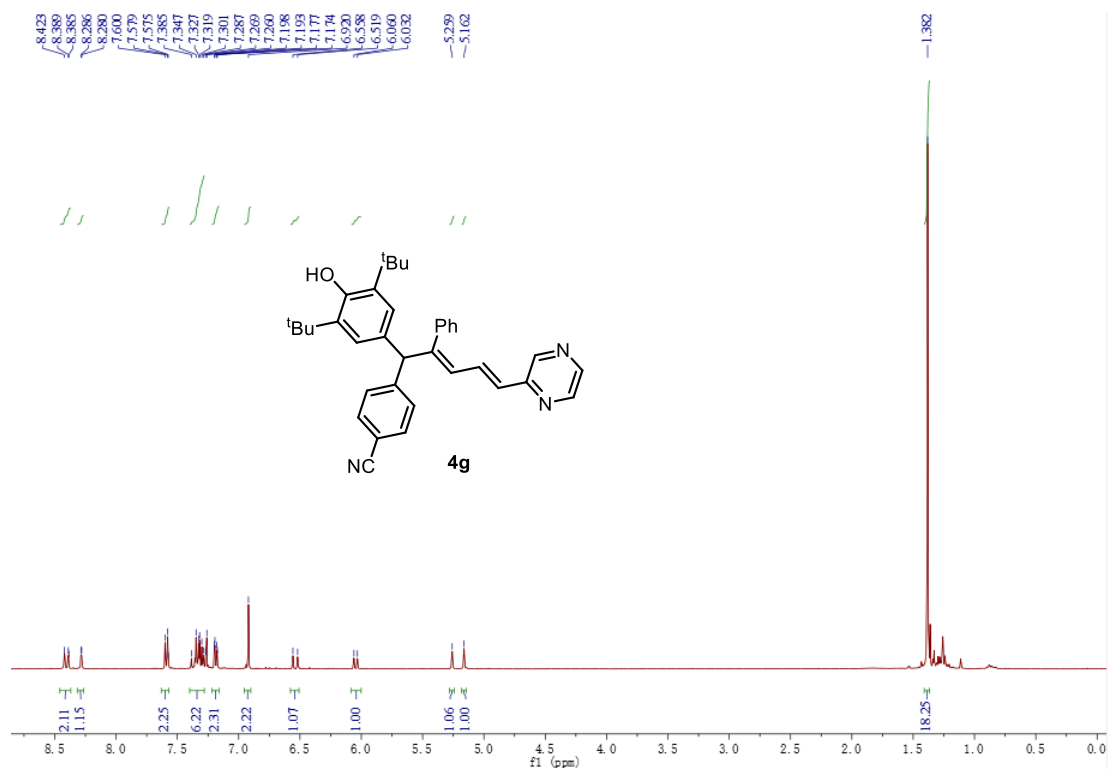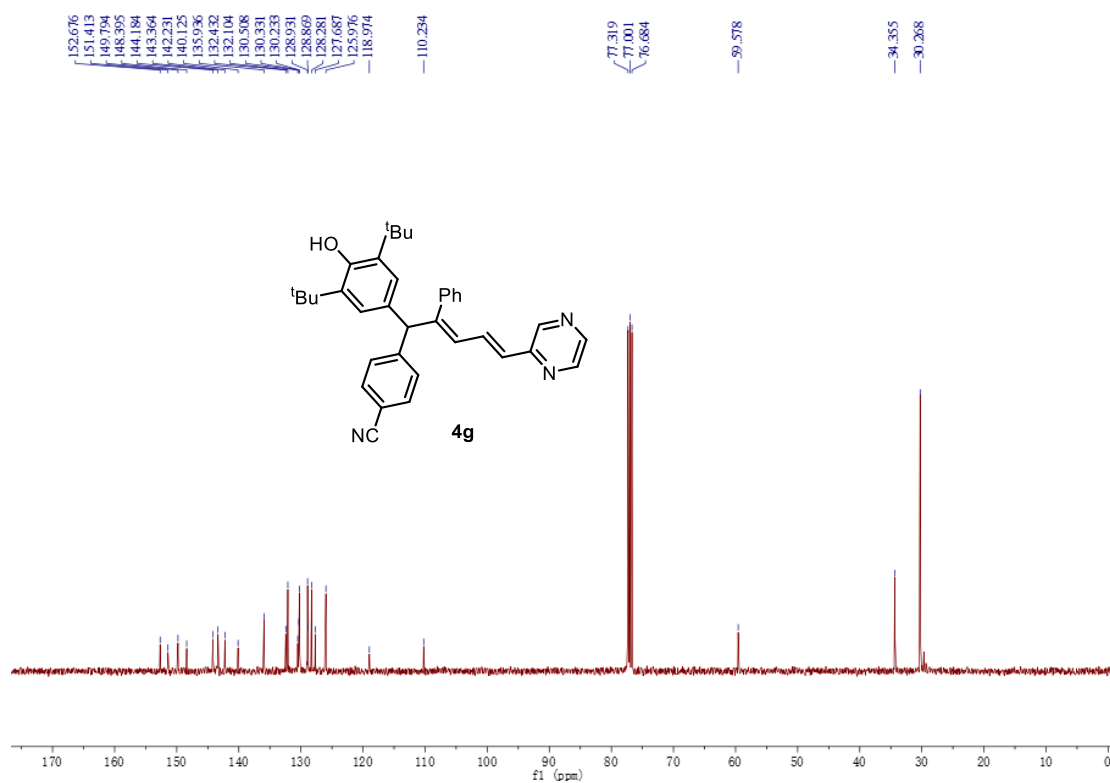

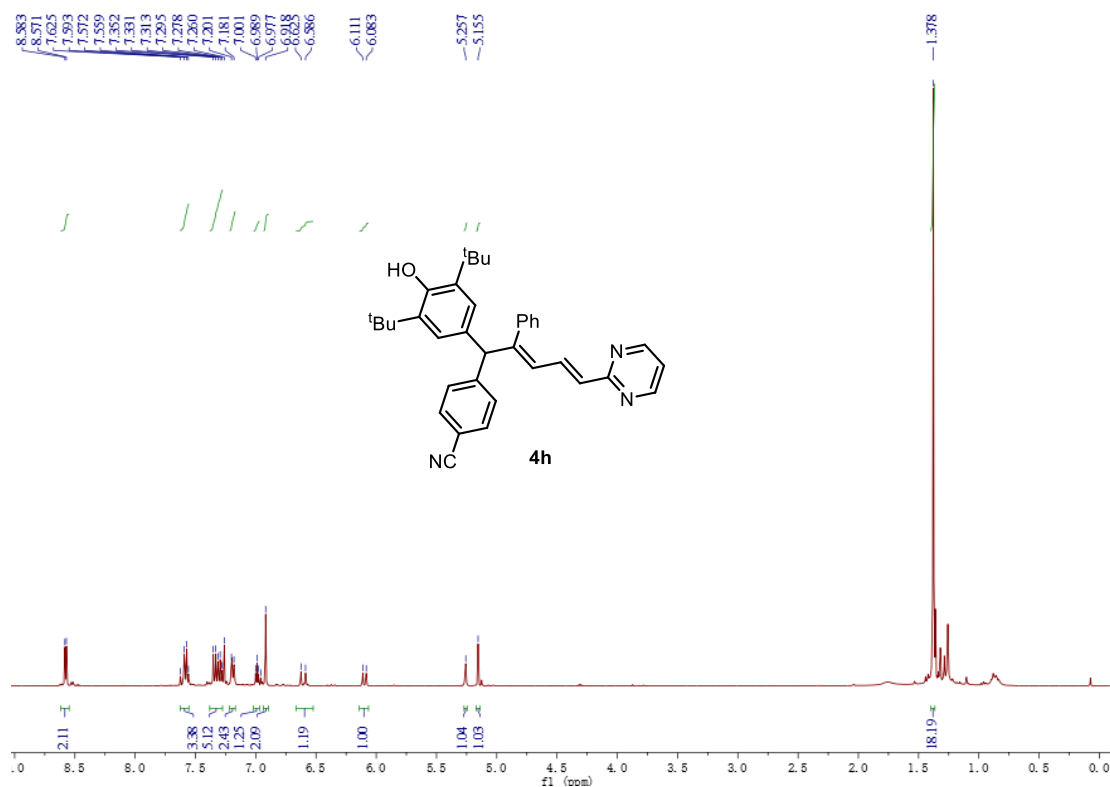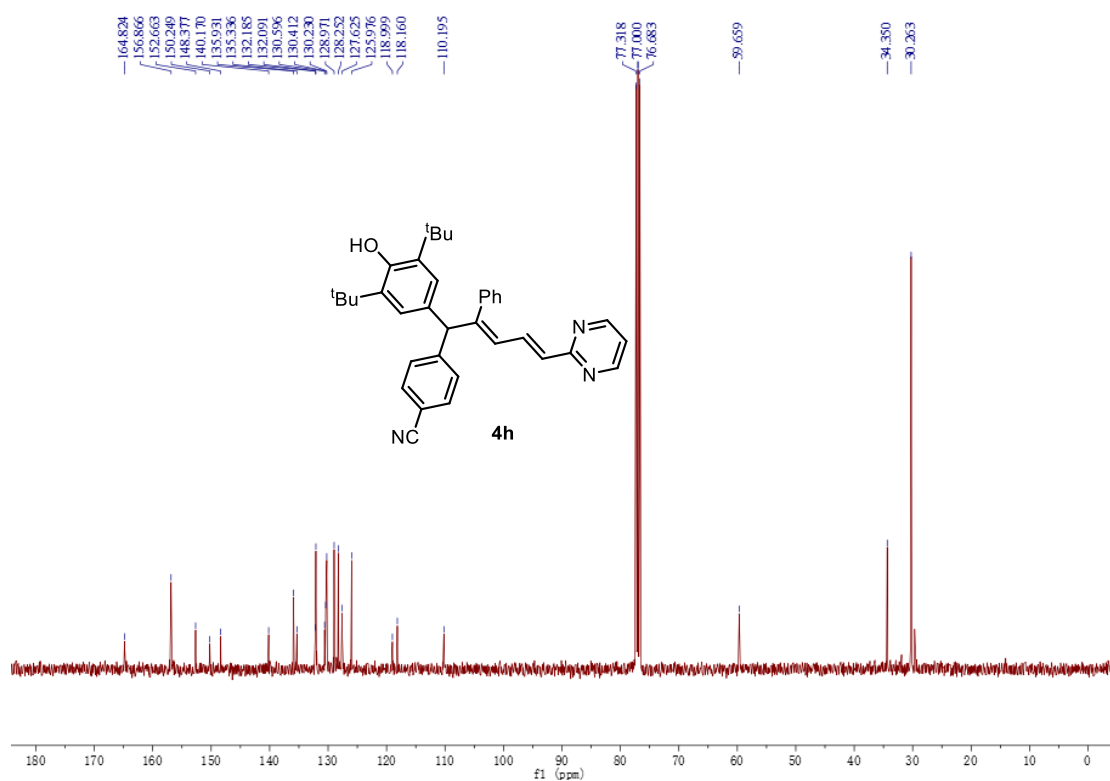



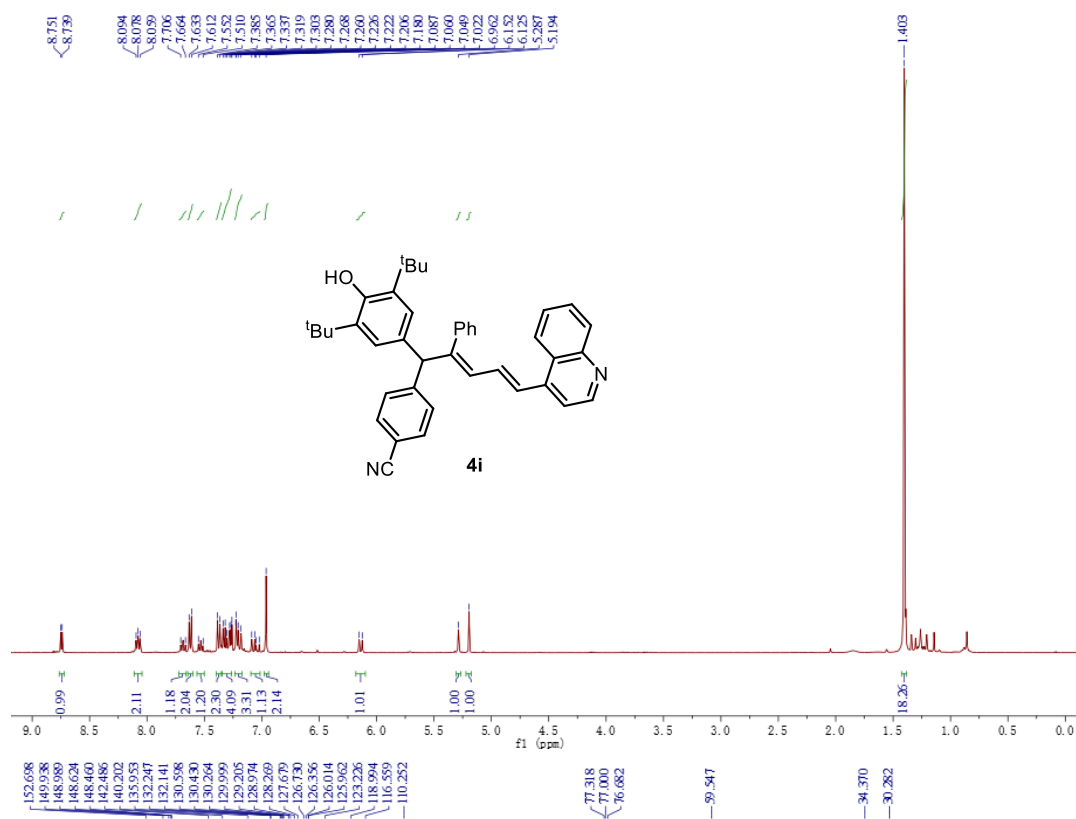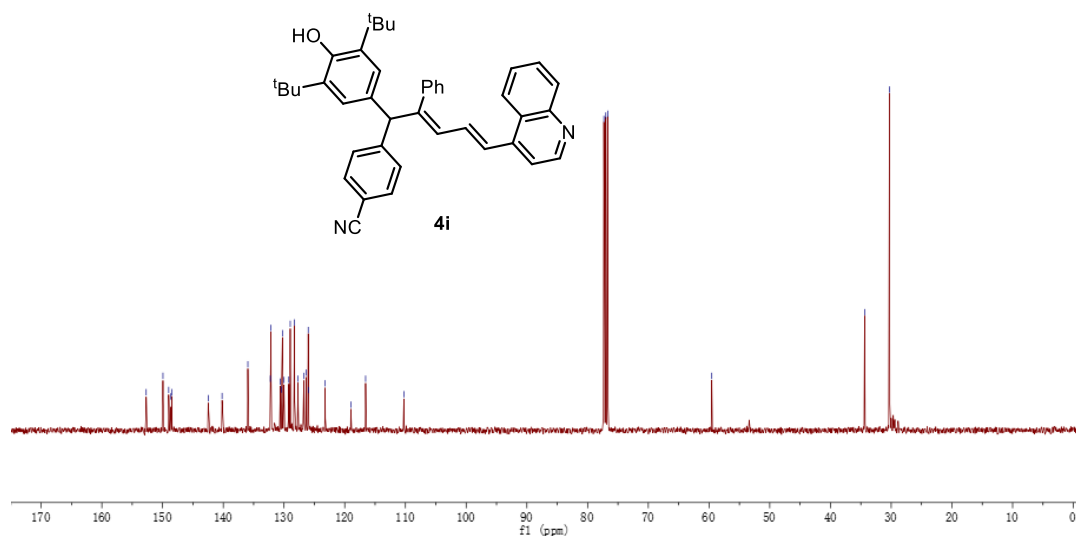

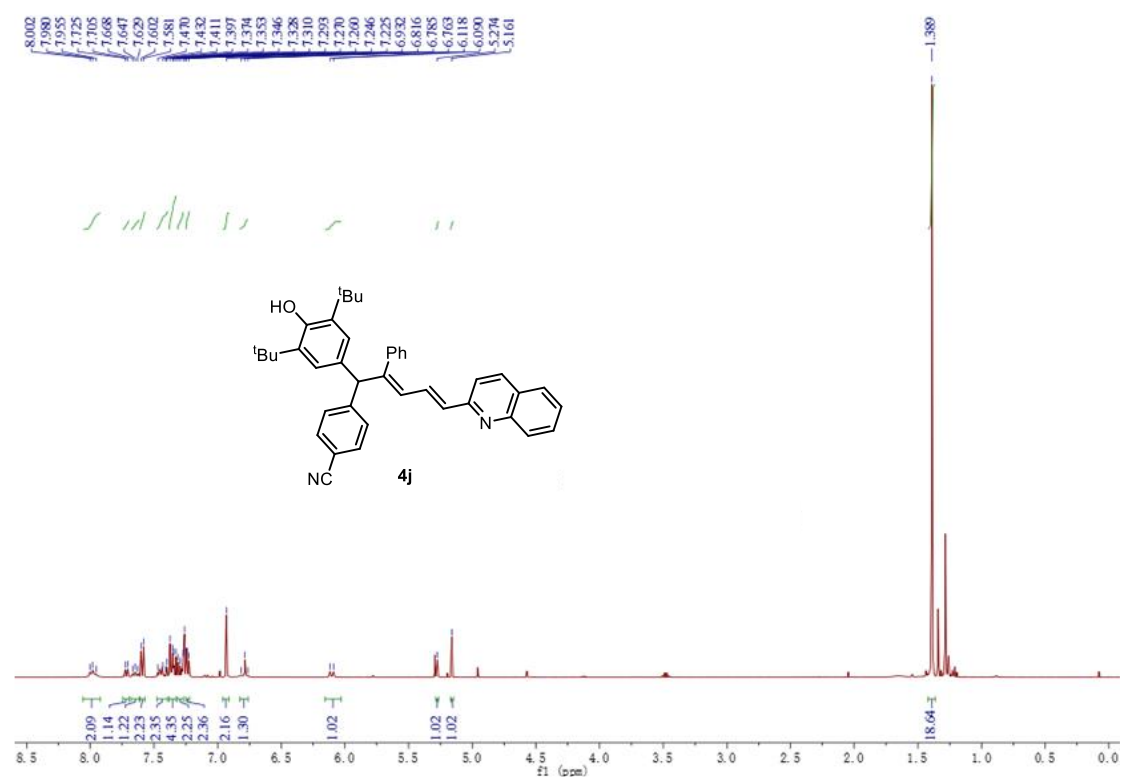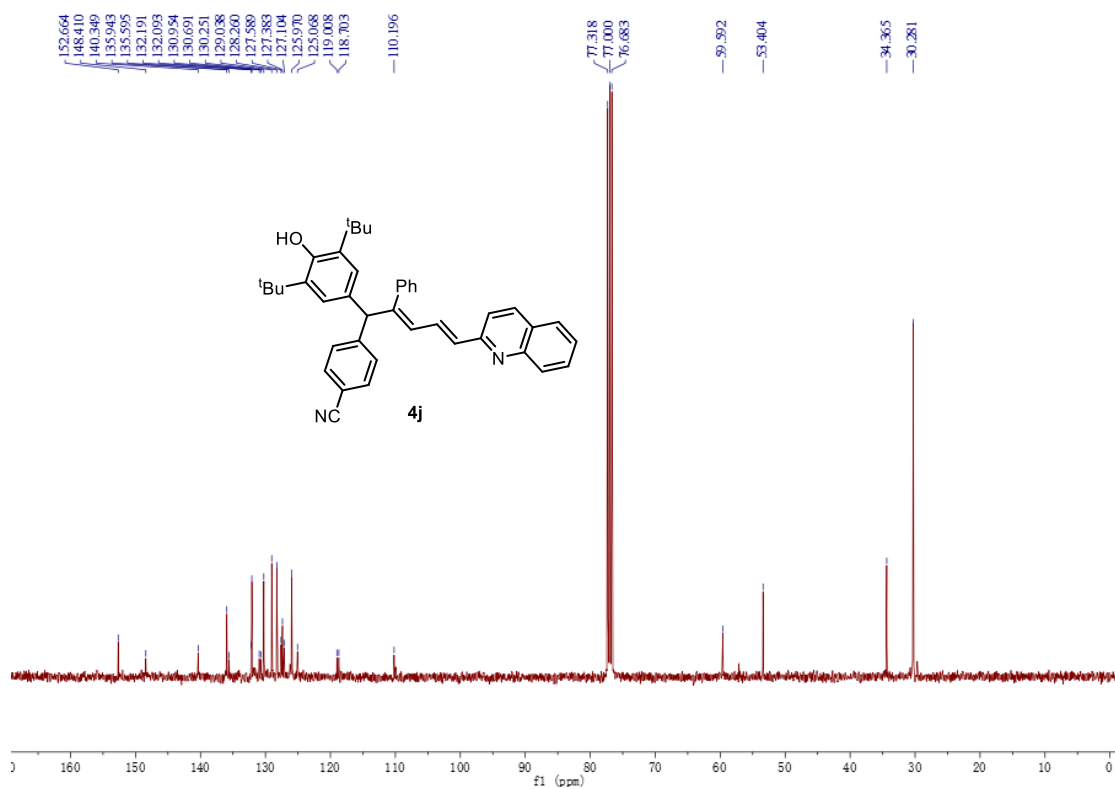

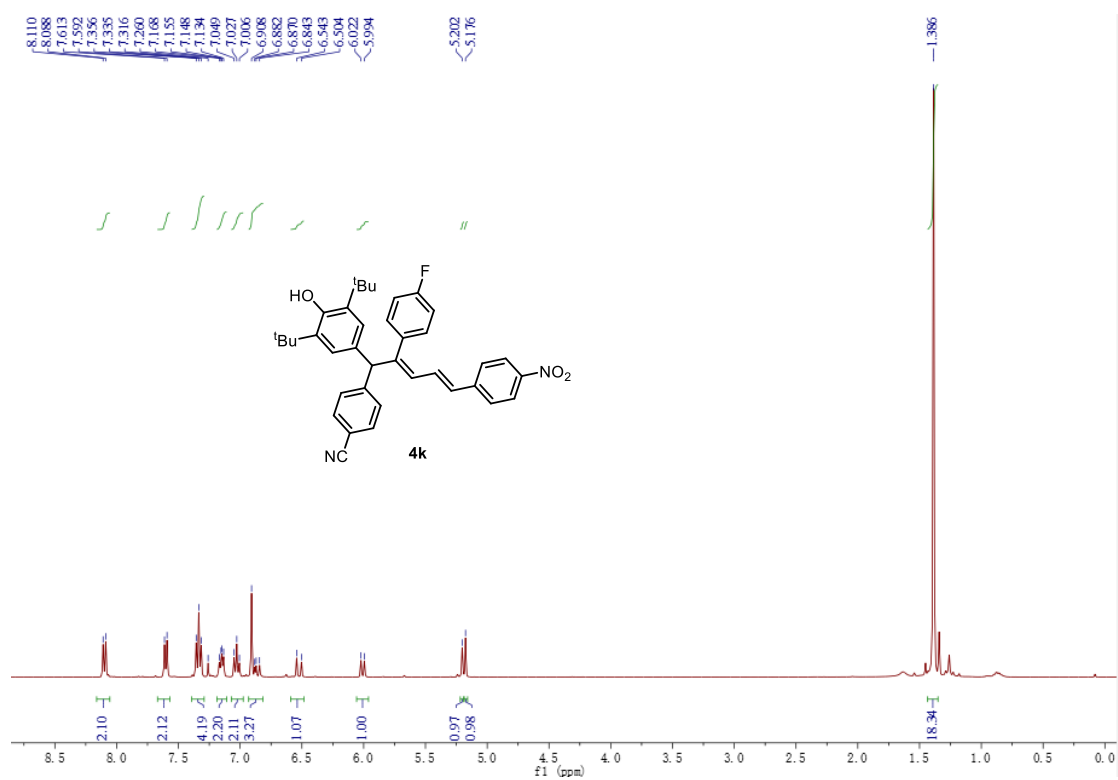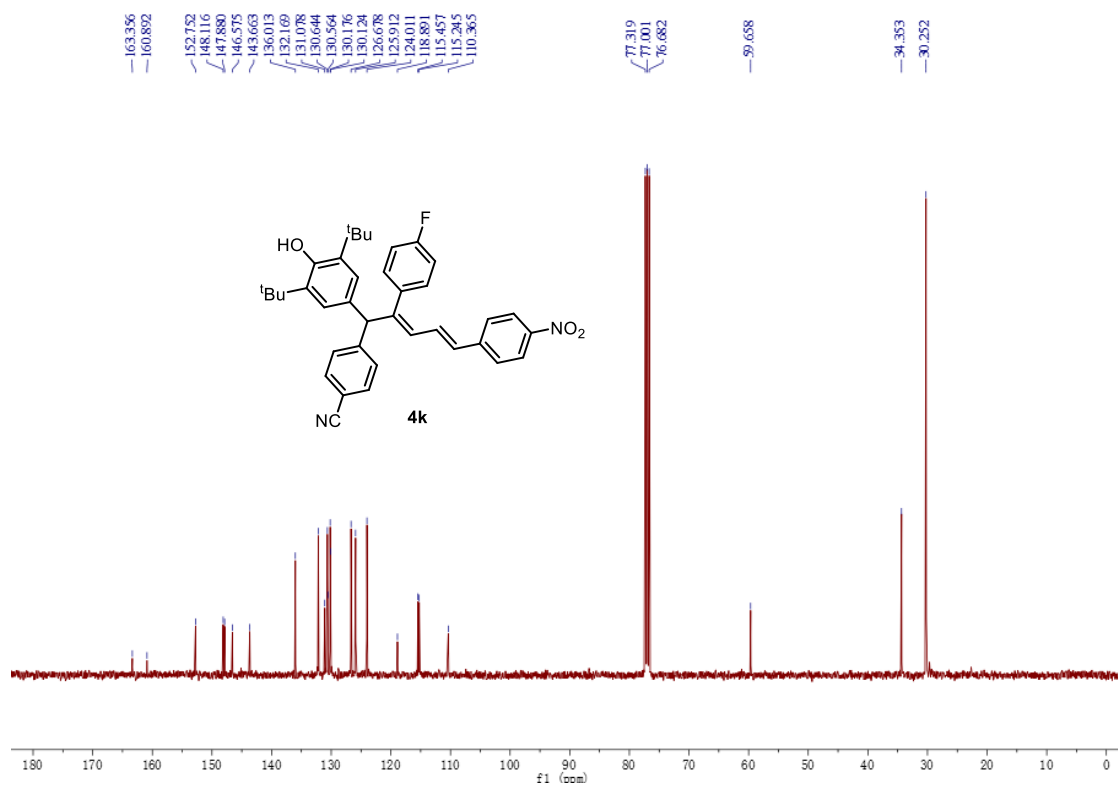

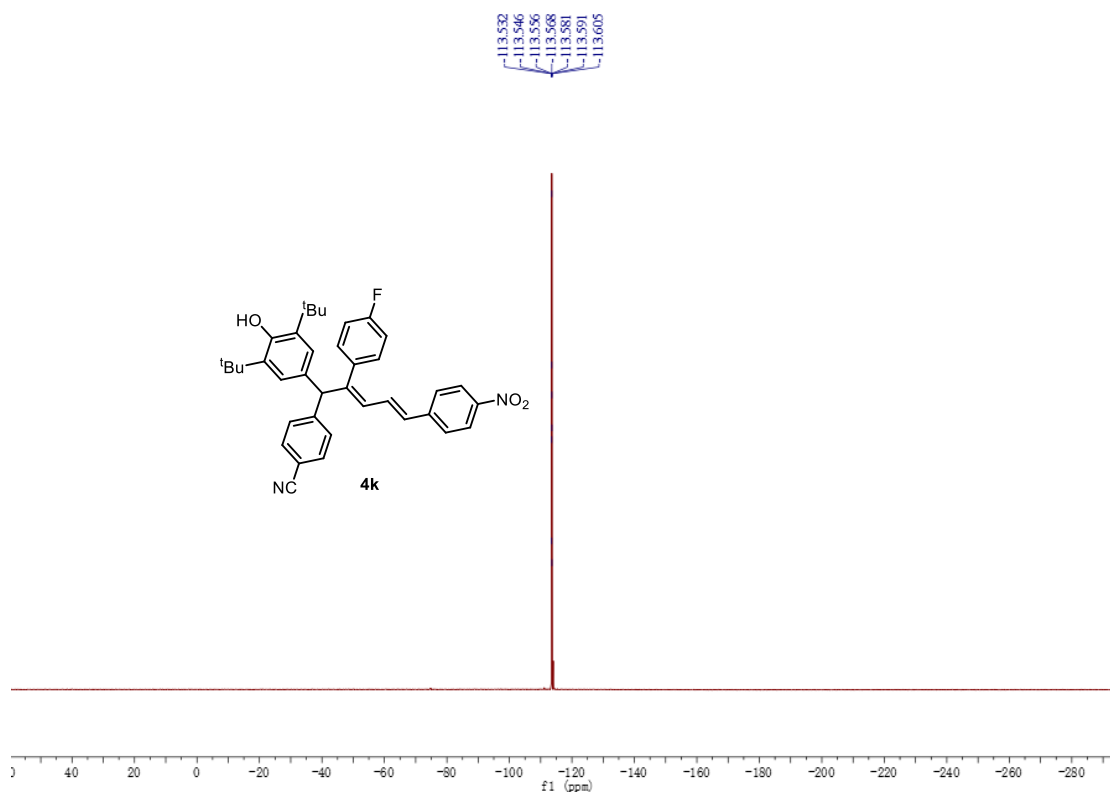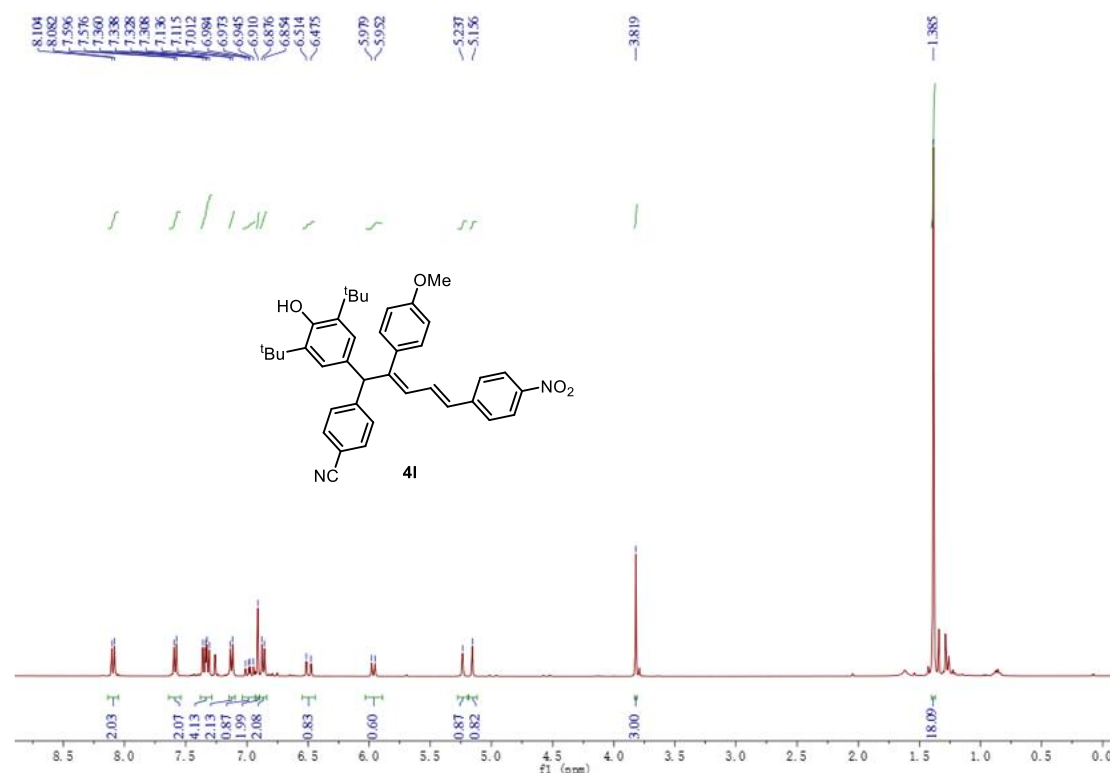

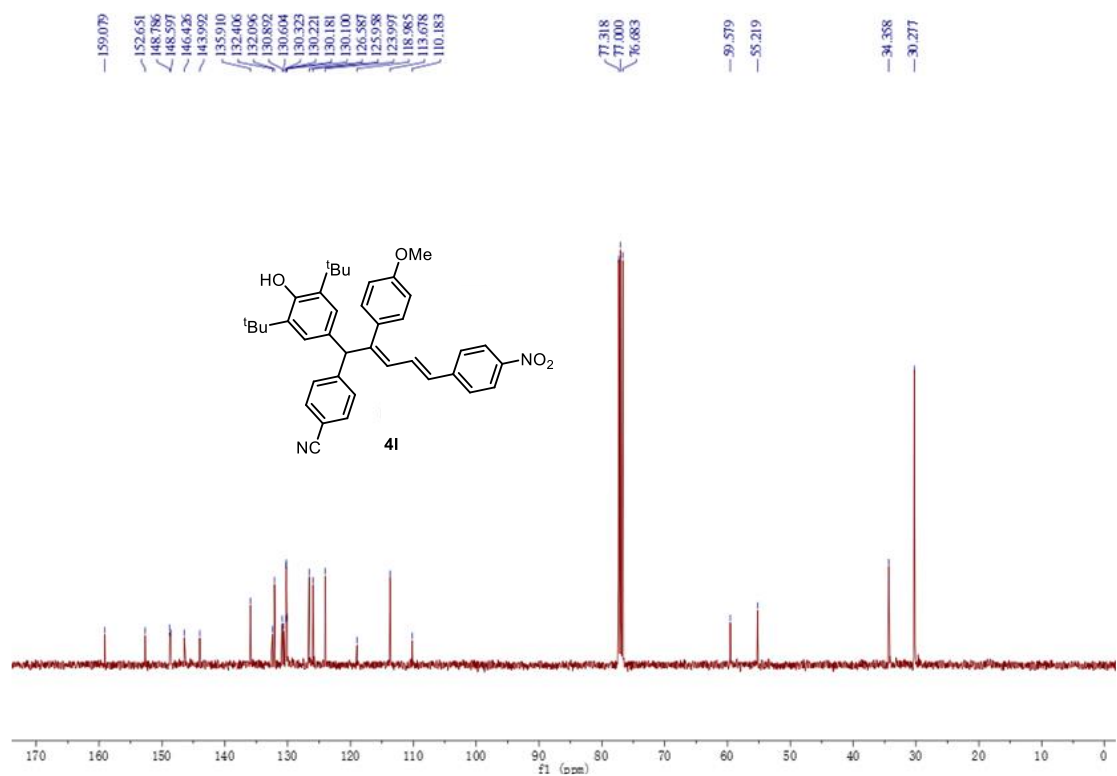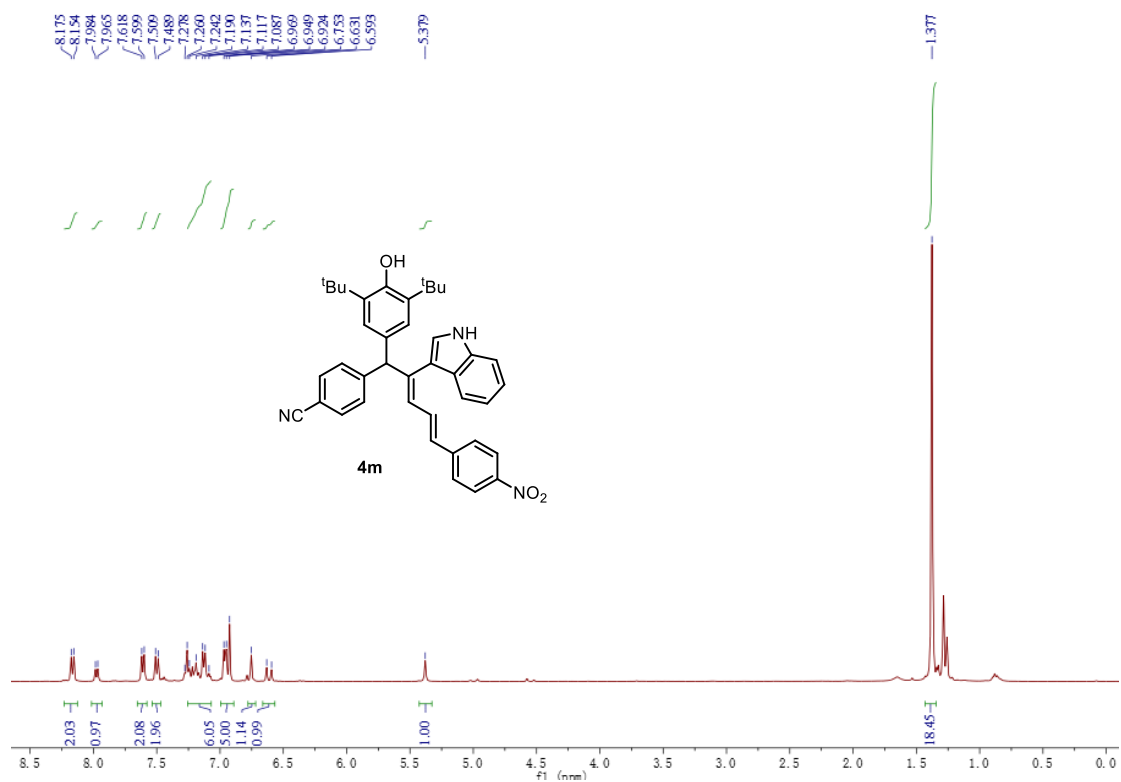

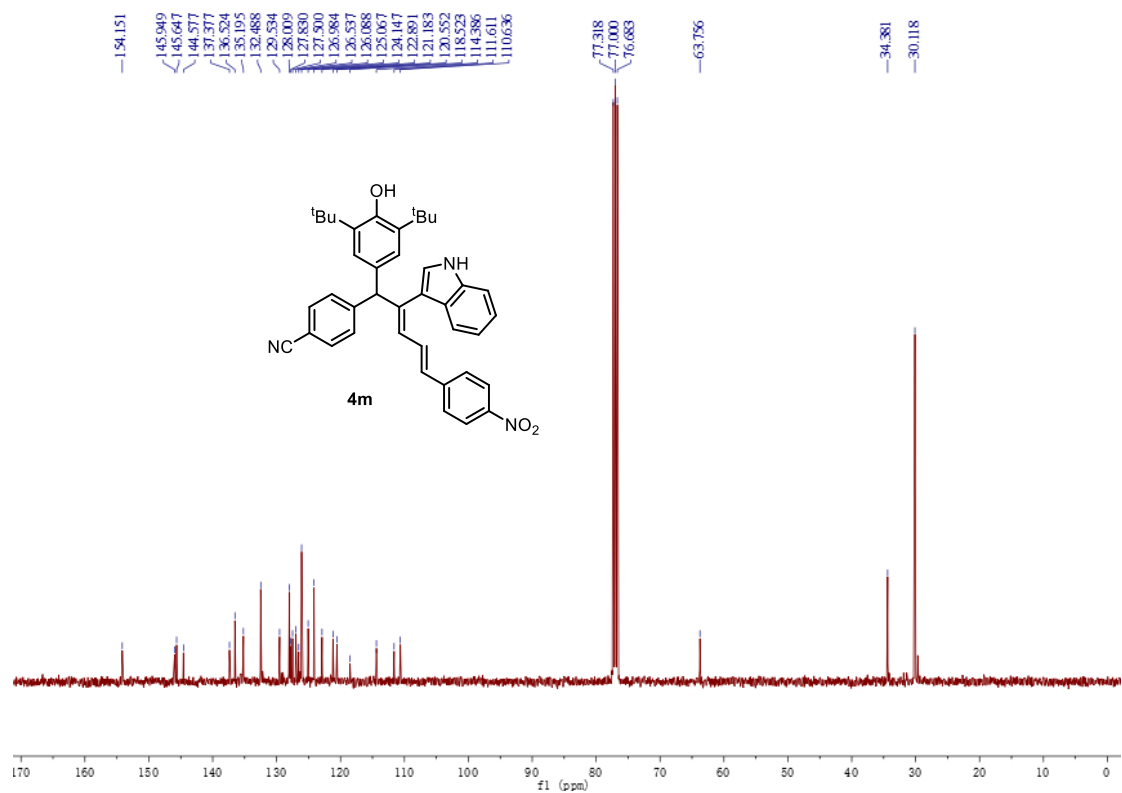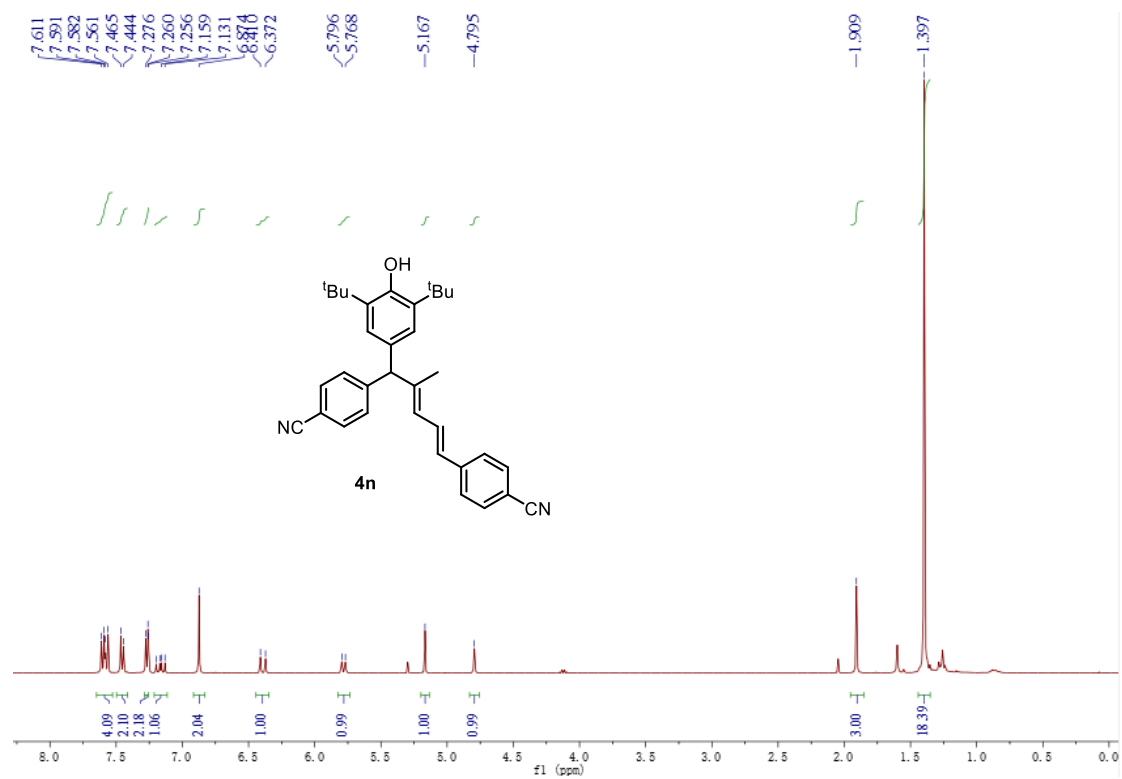

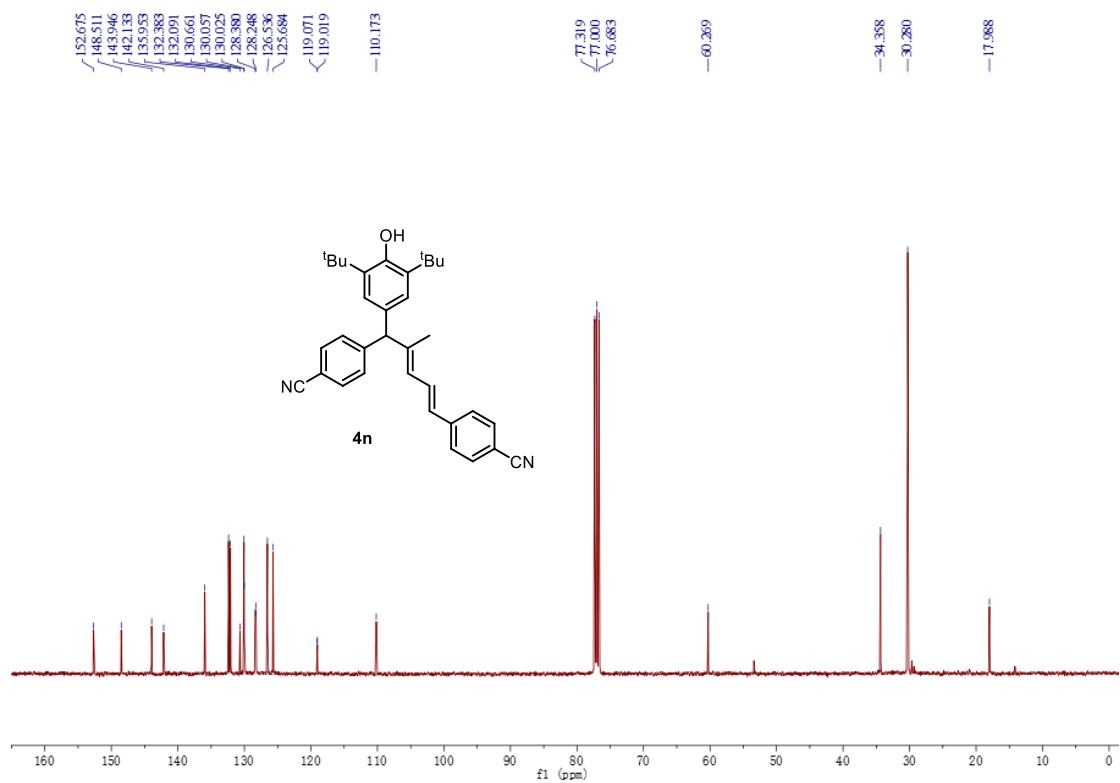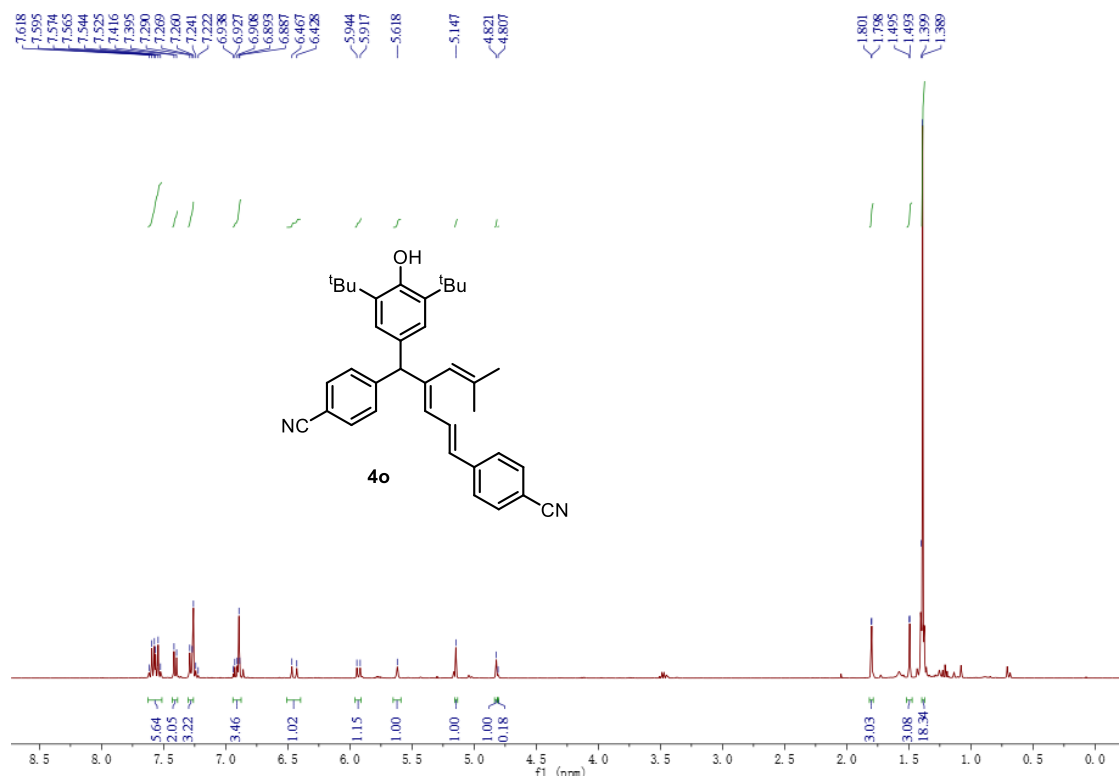

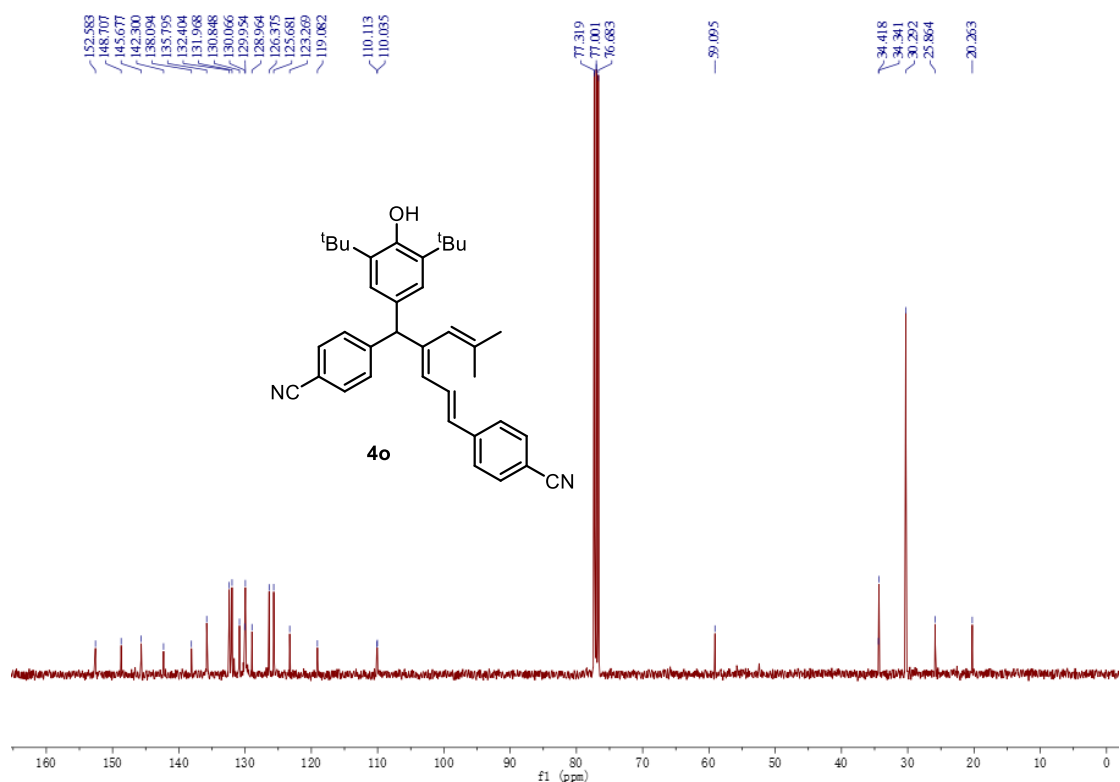

## NMR spectra of compound 5

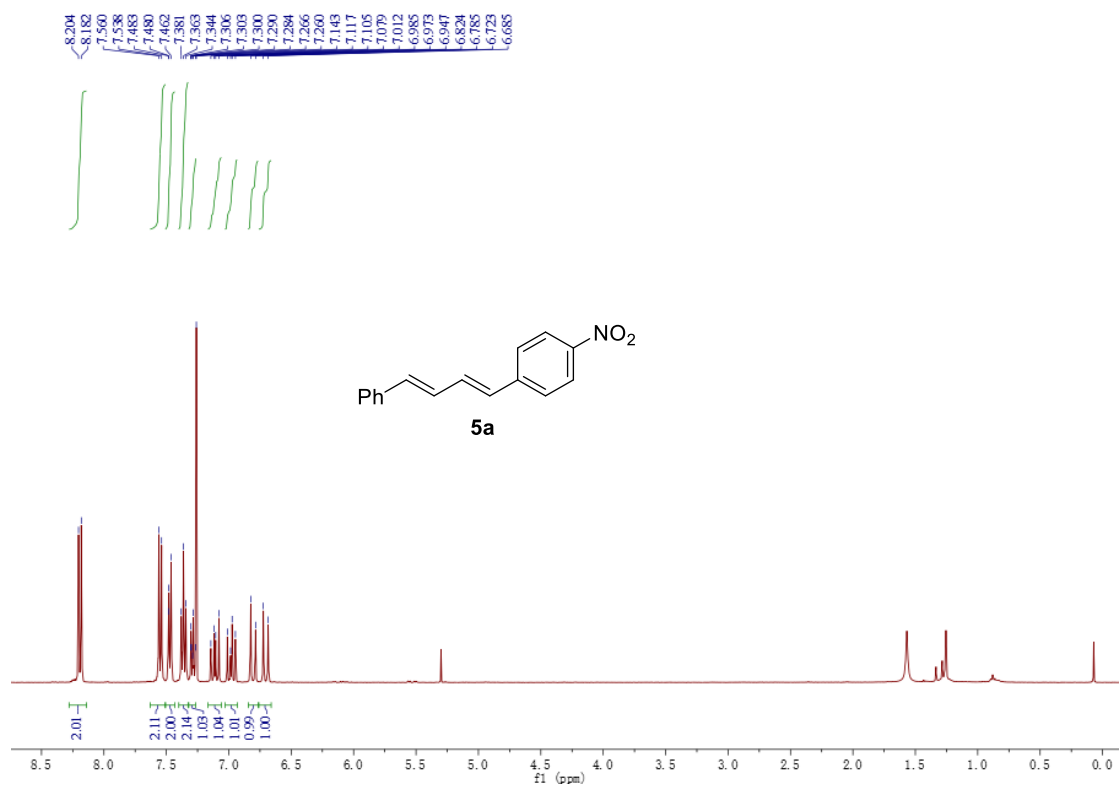



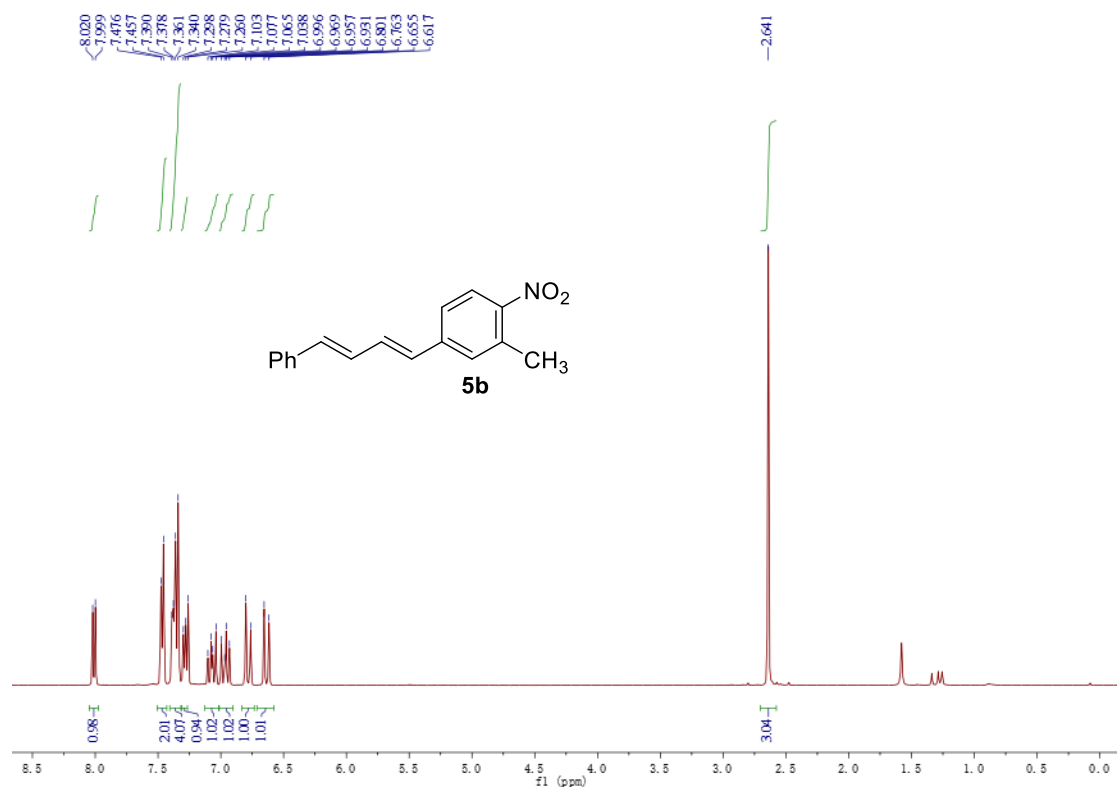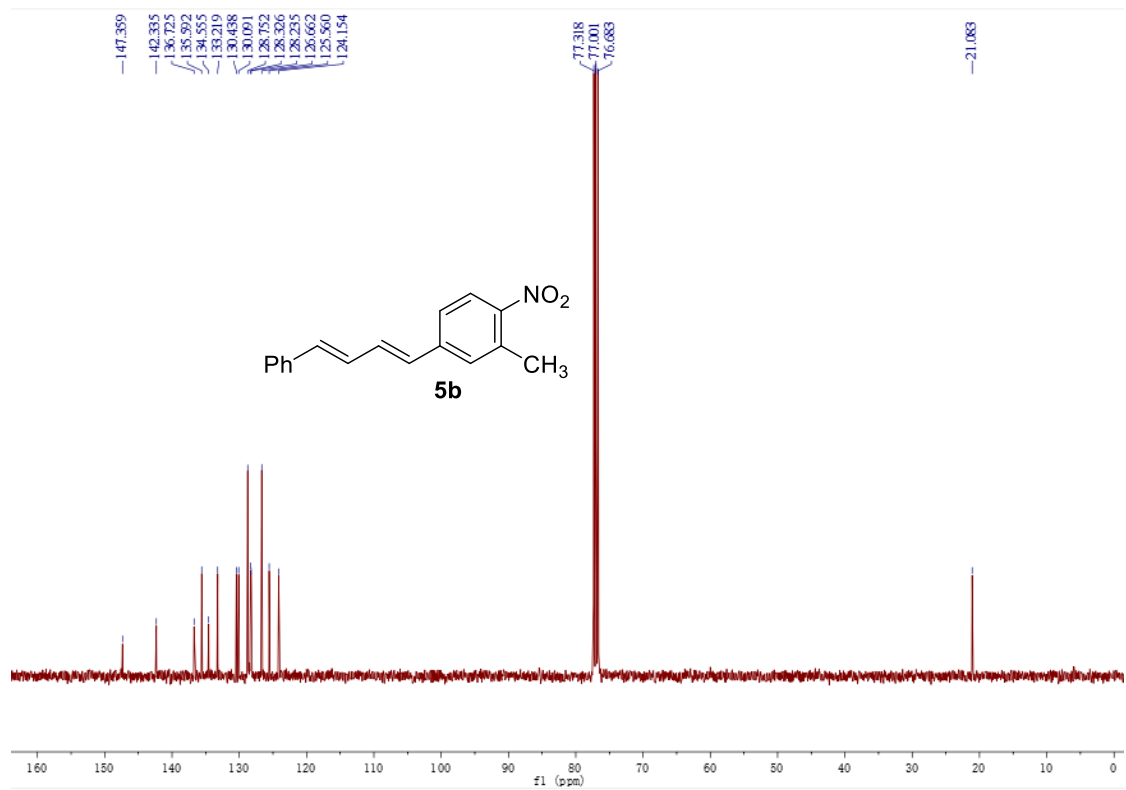

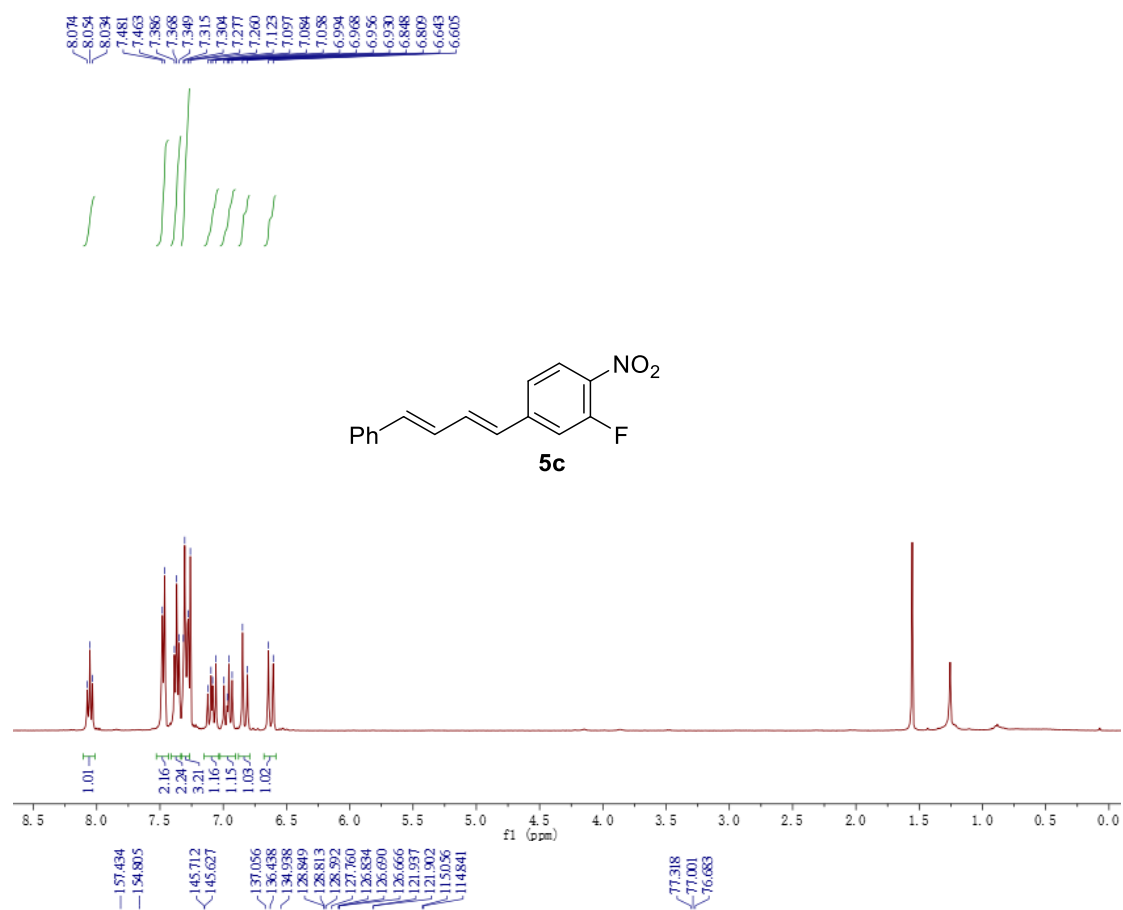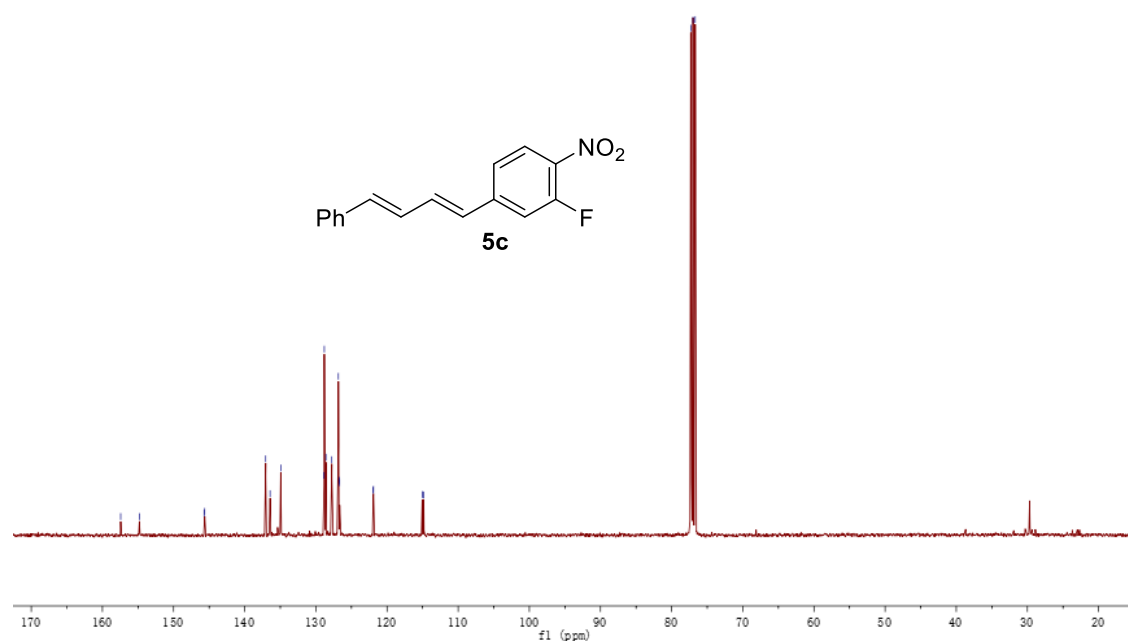

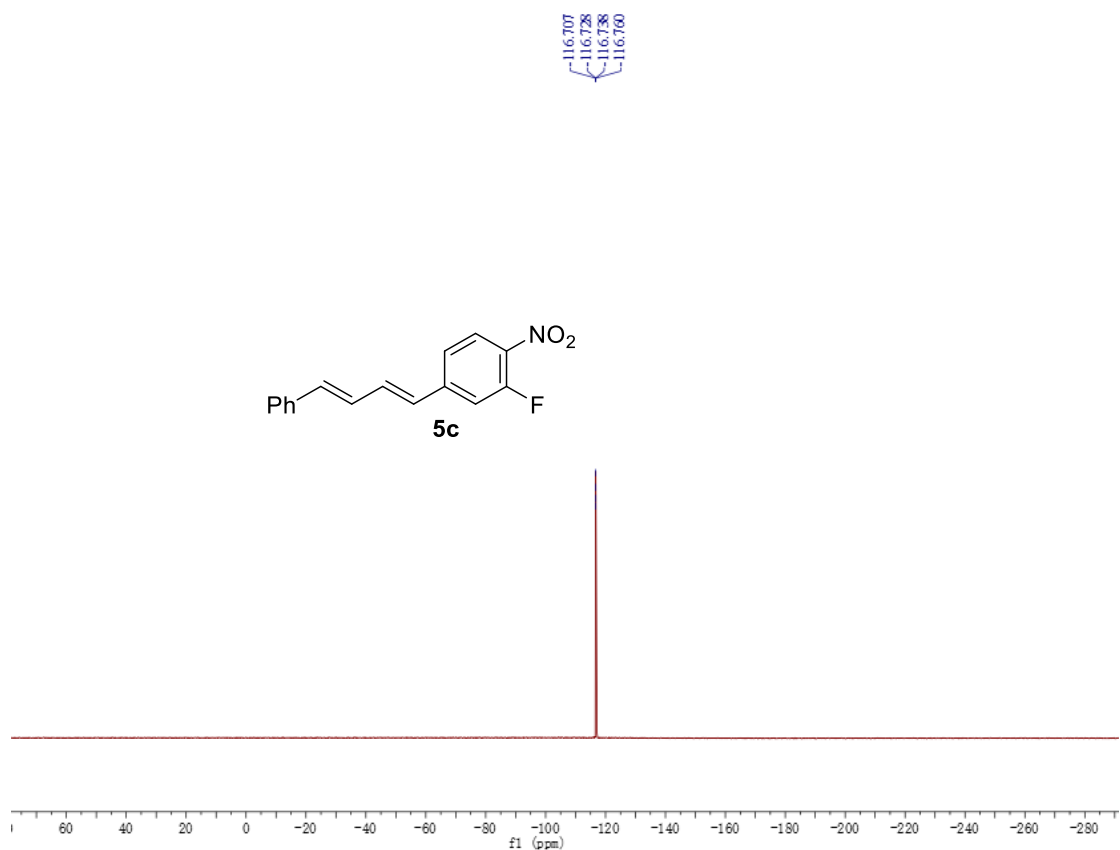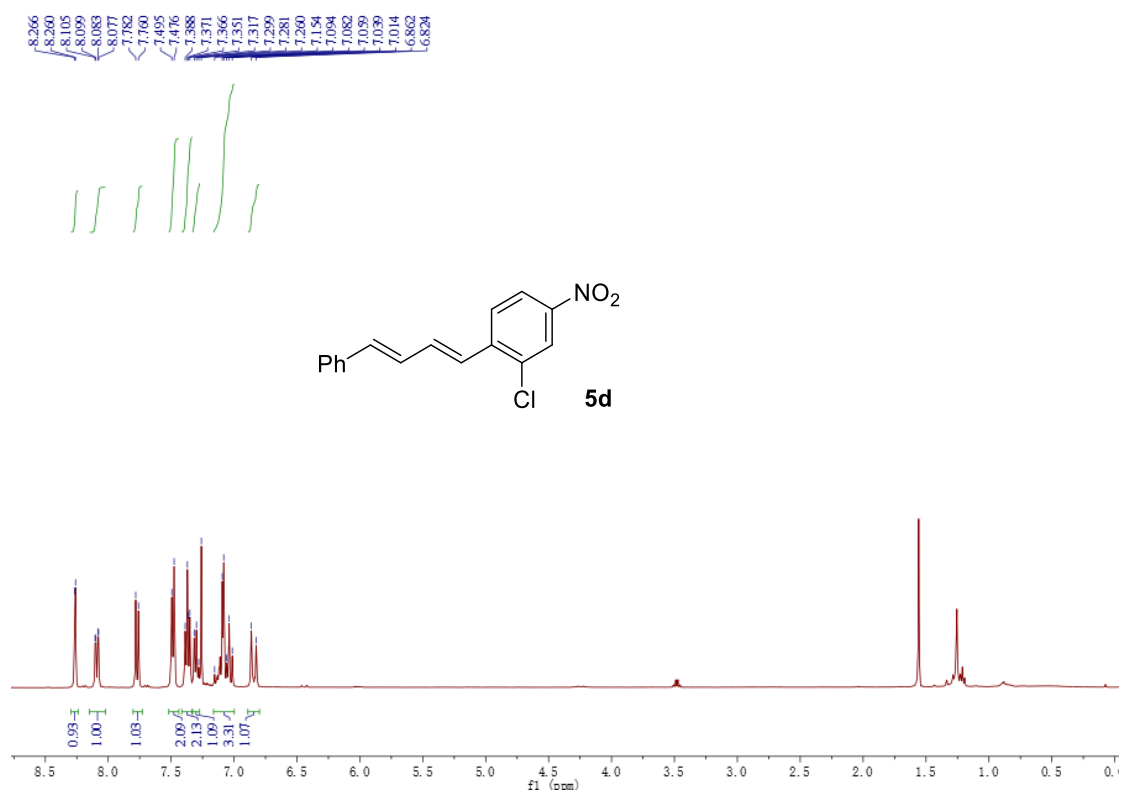

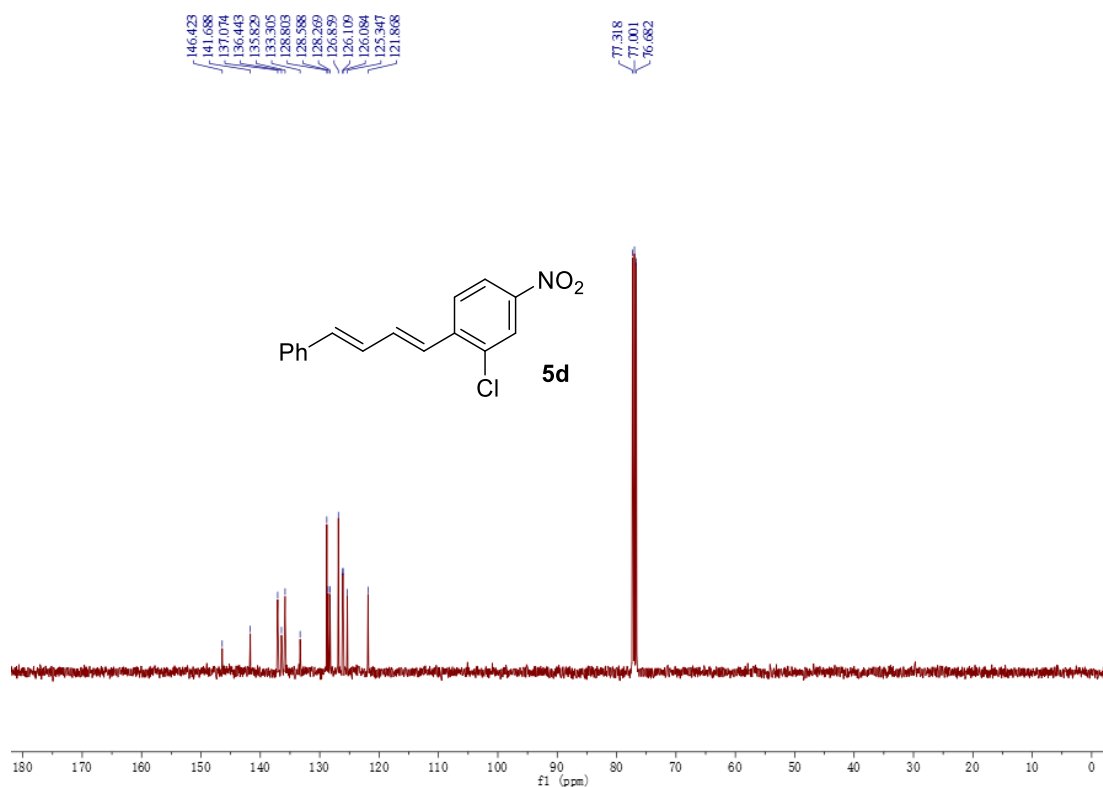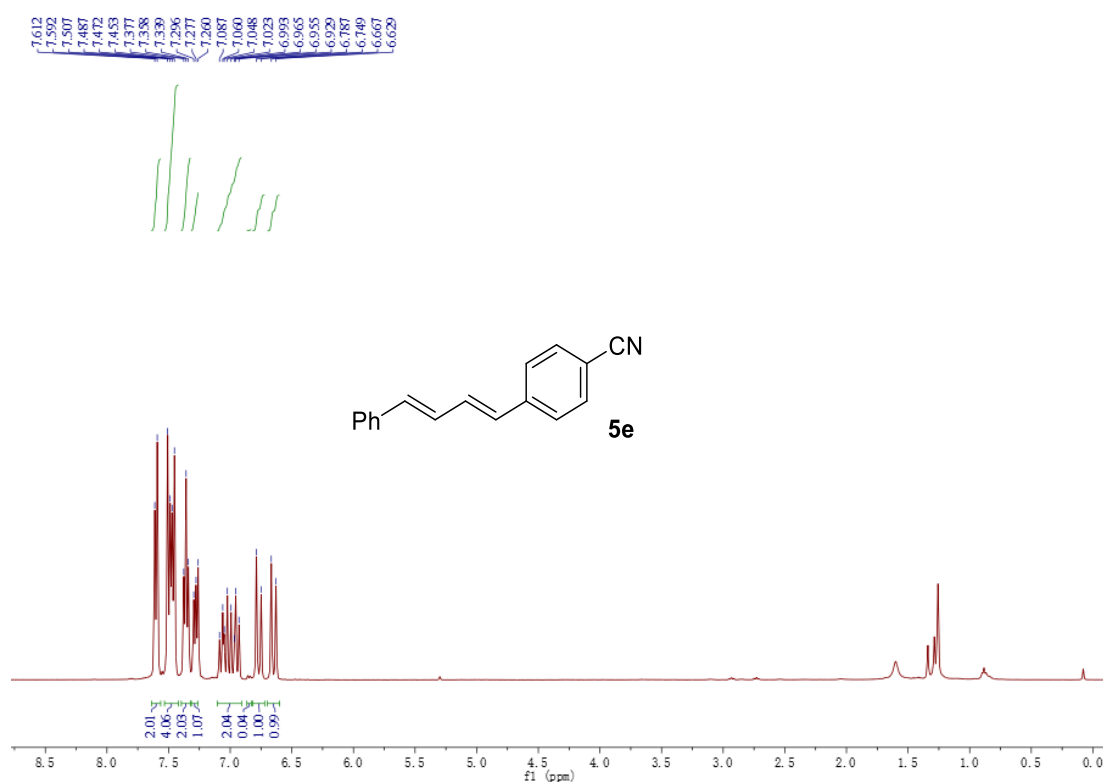

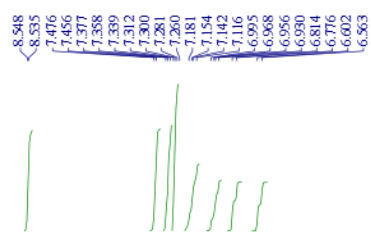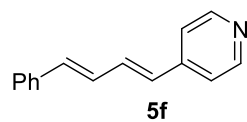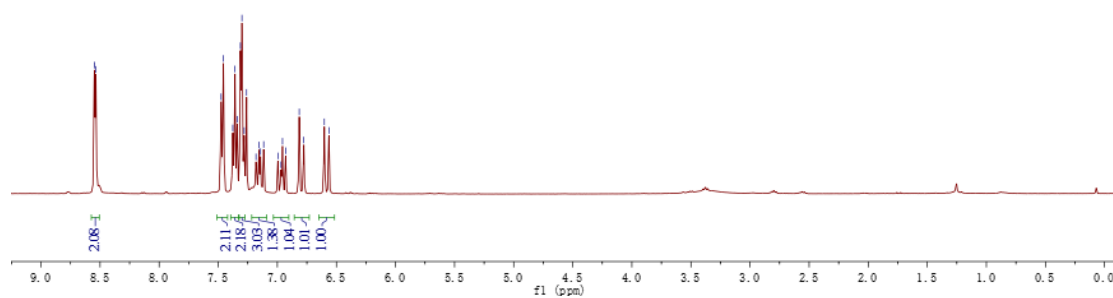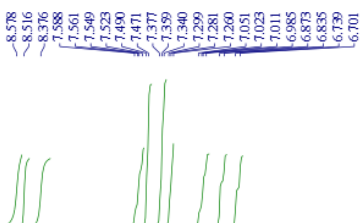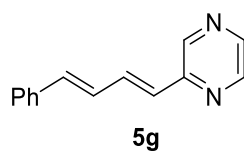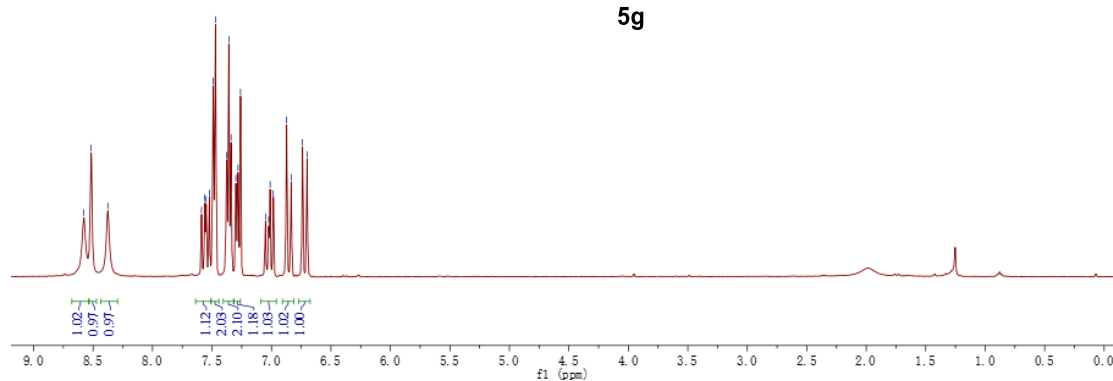

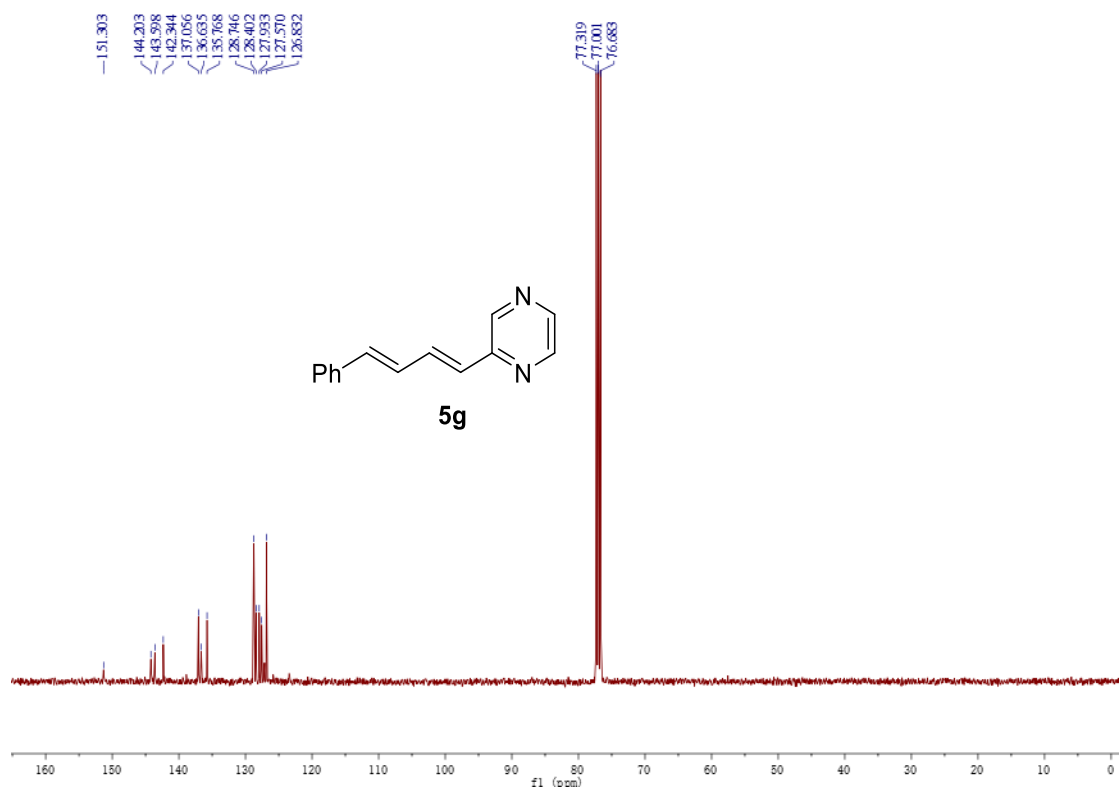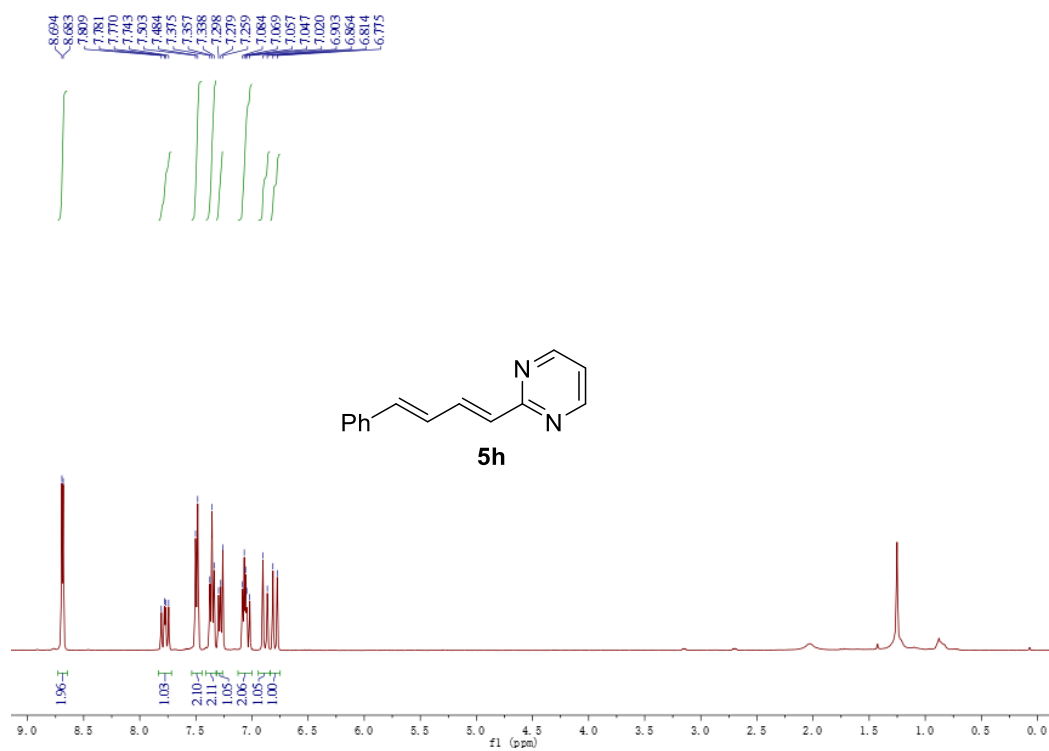

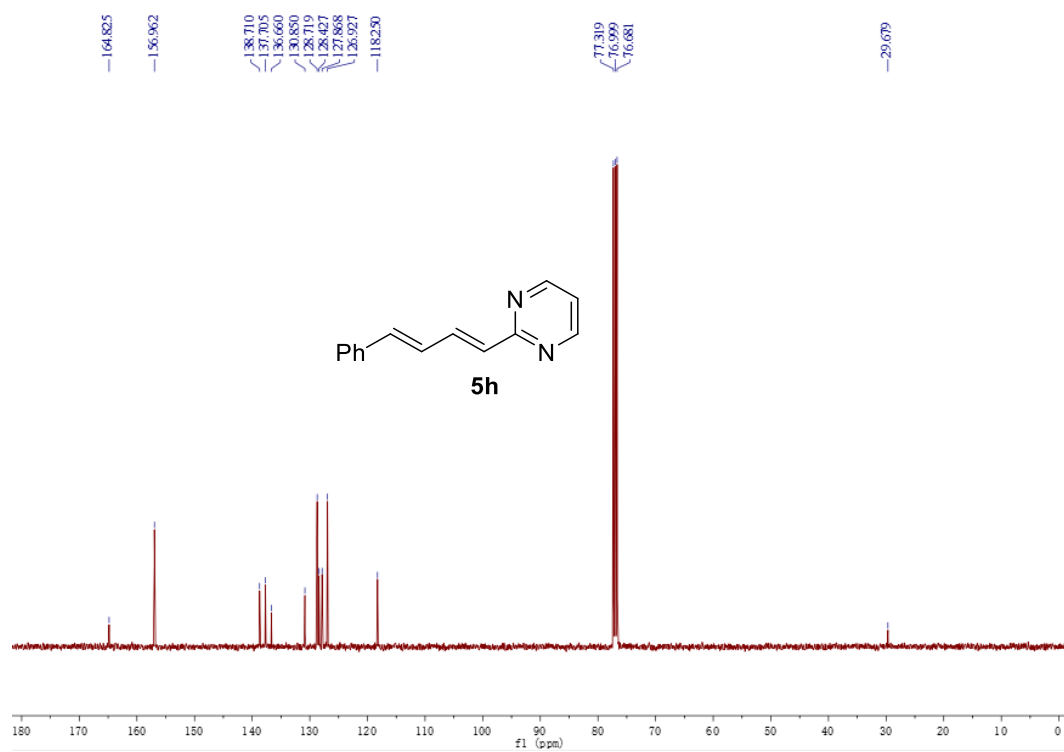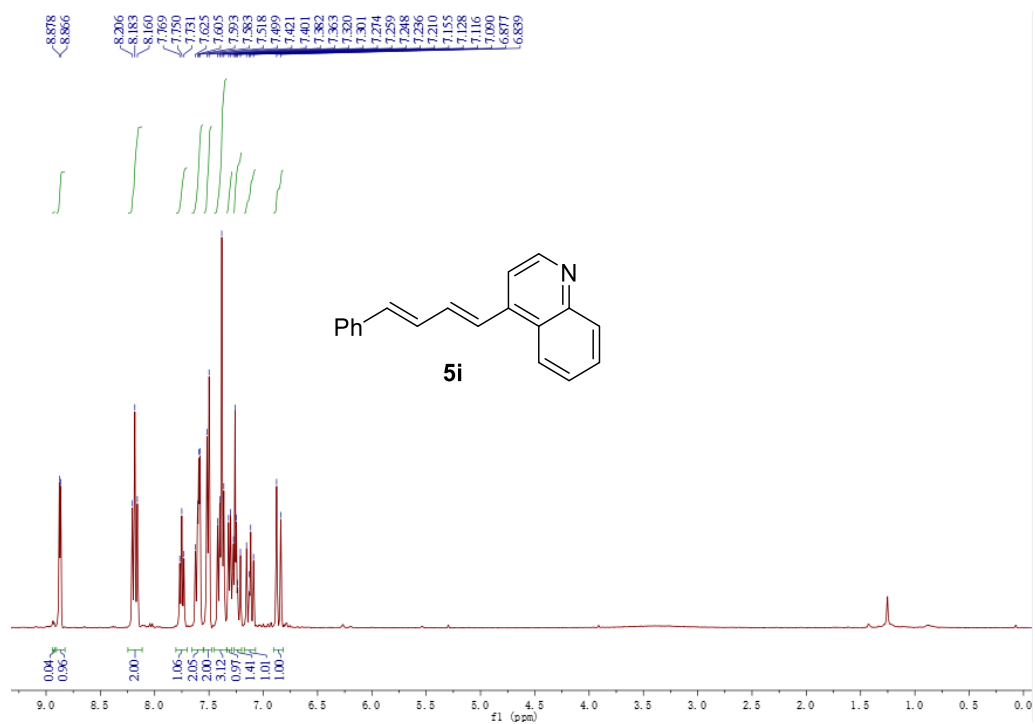

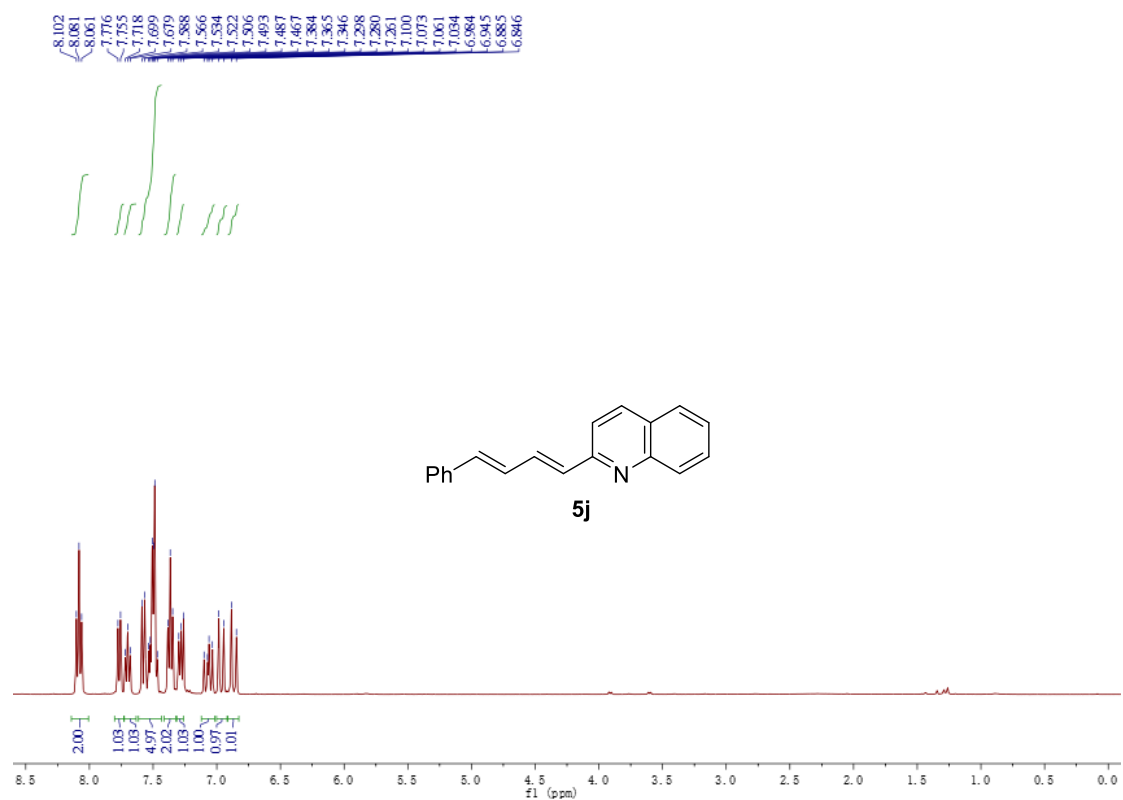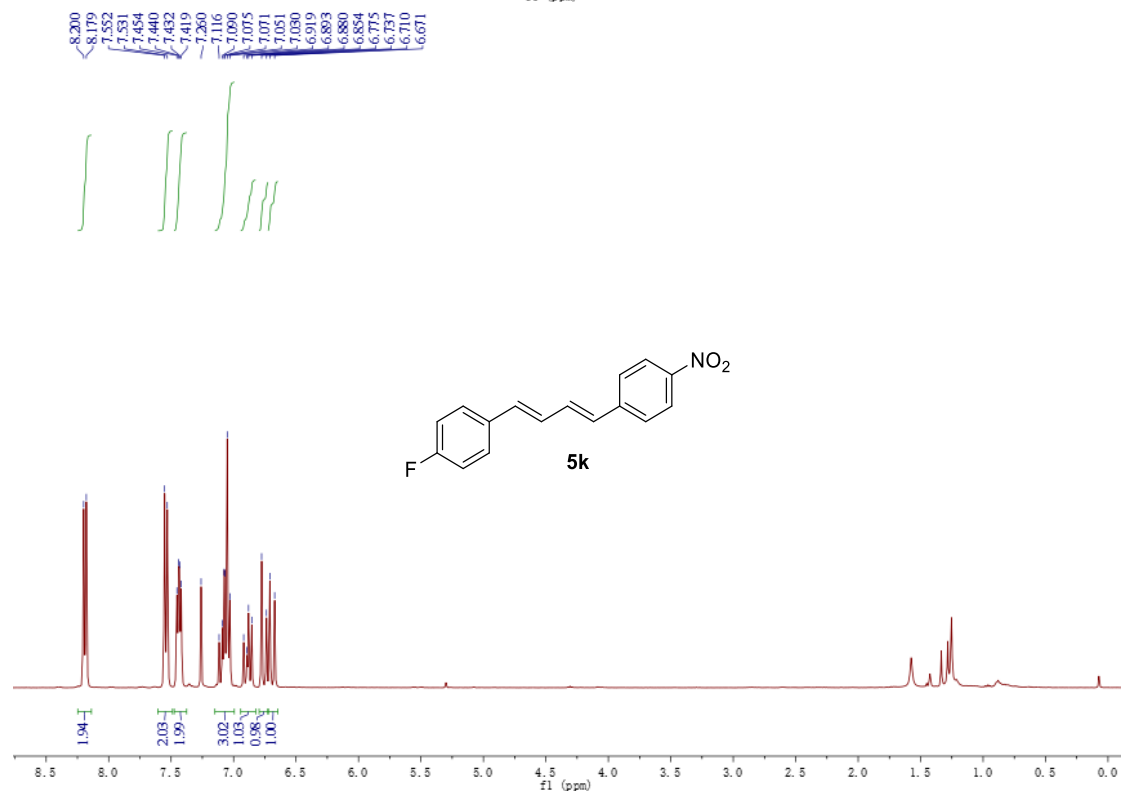



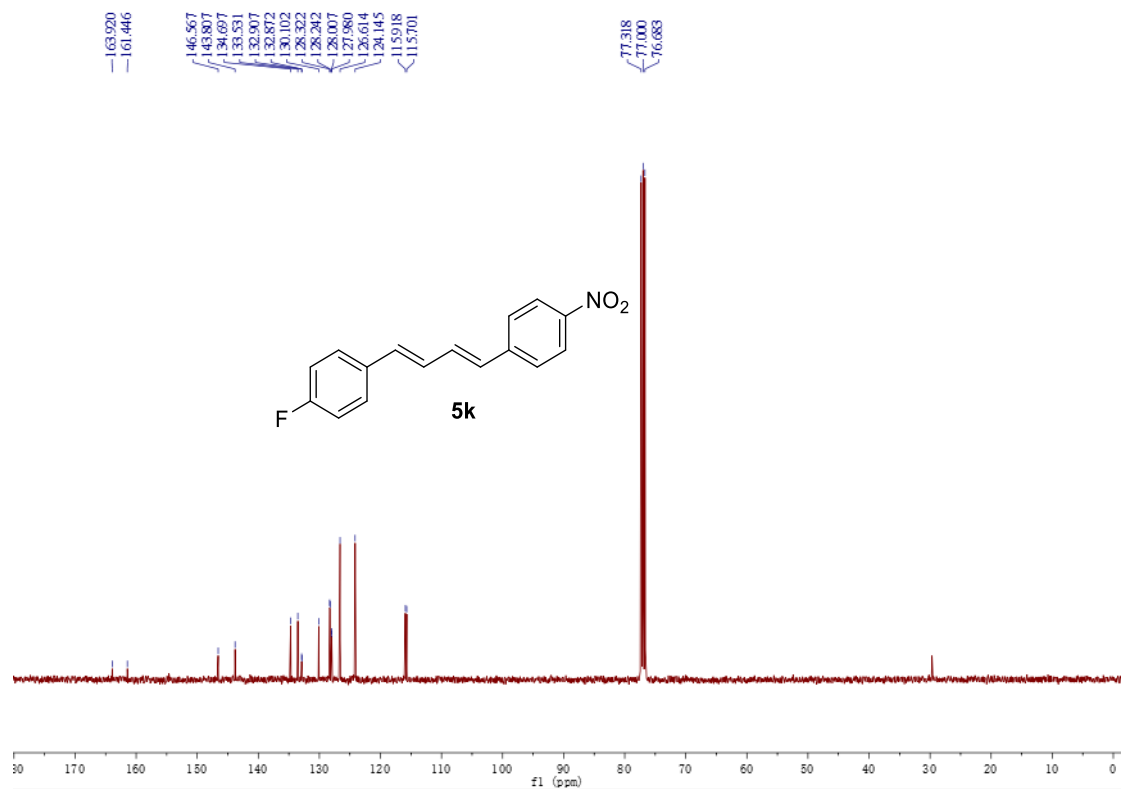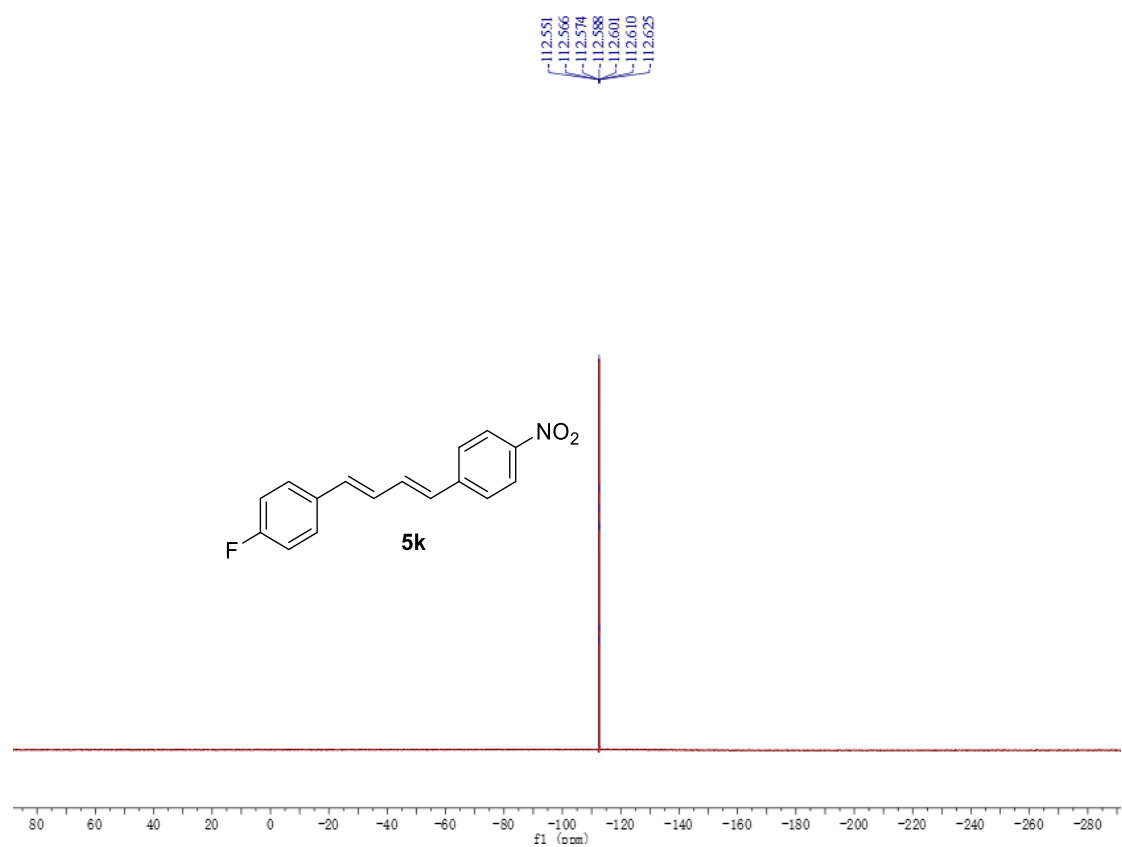

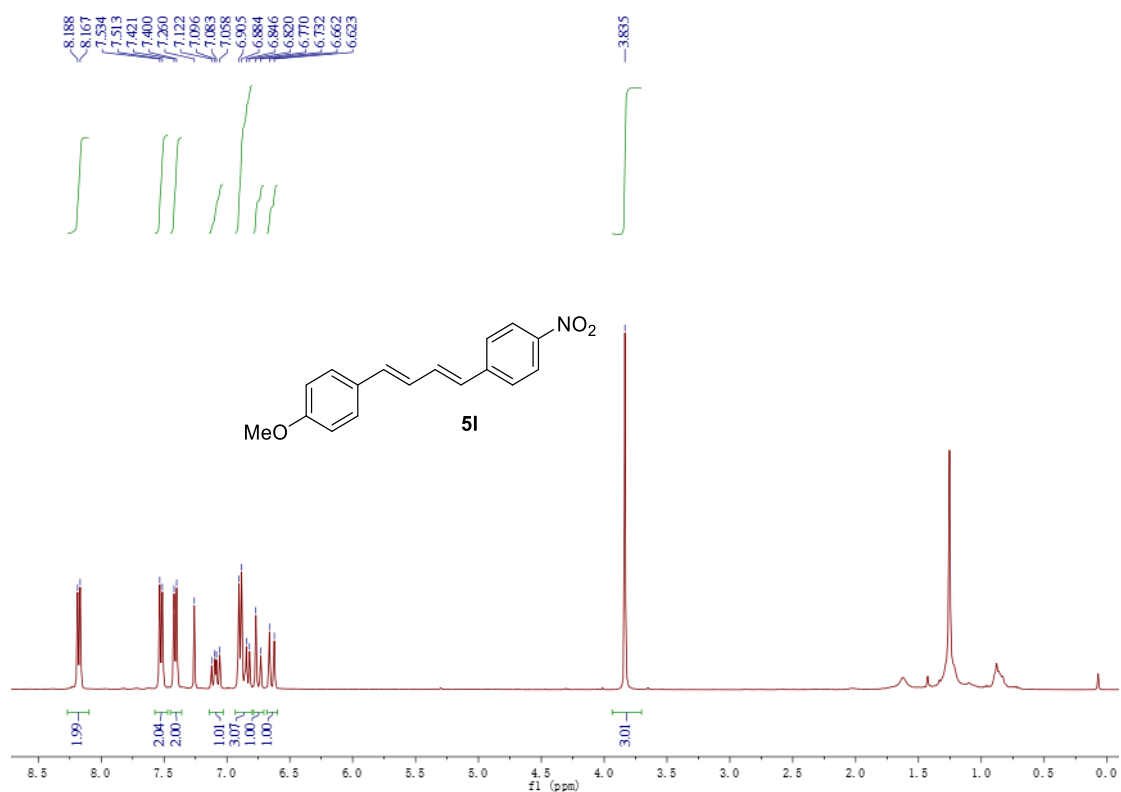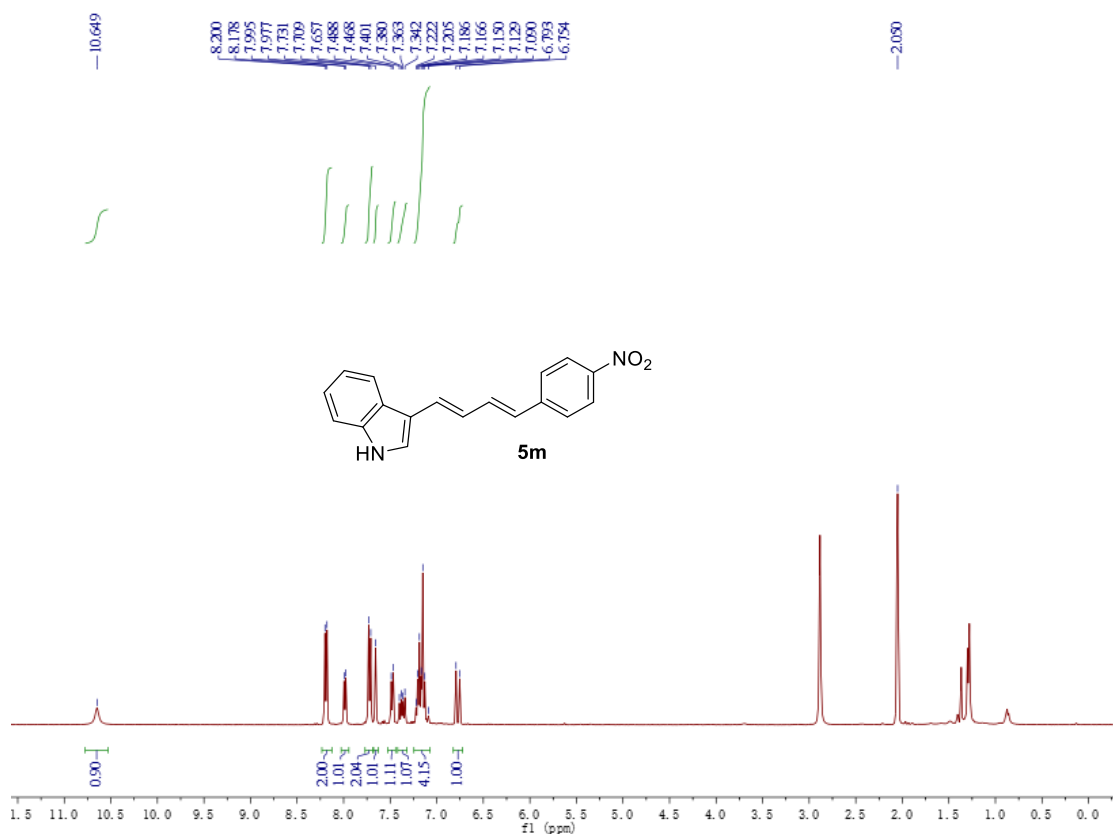

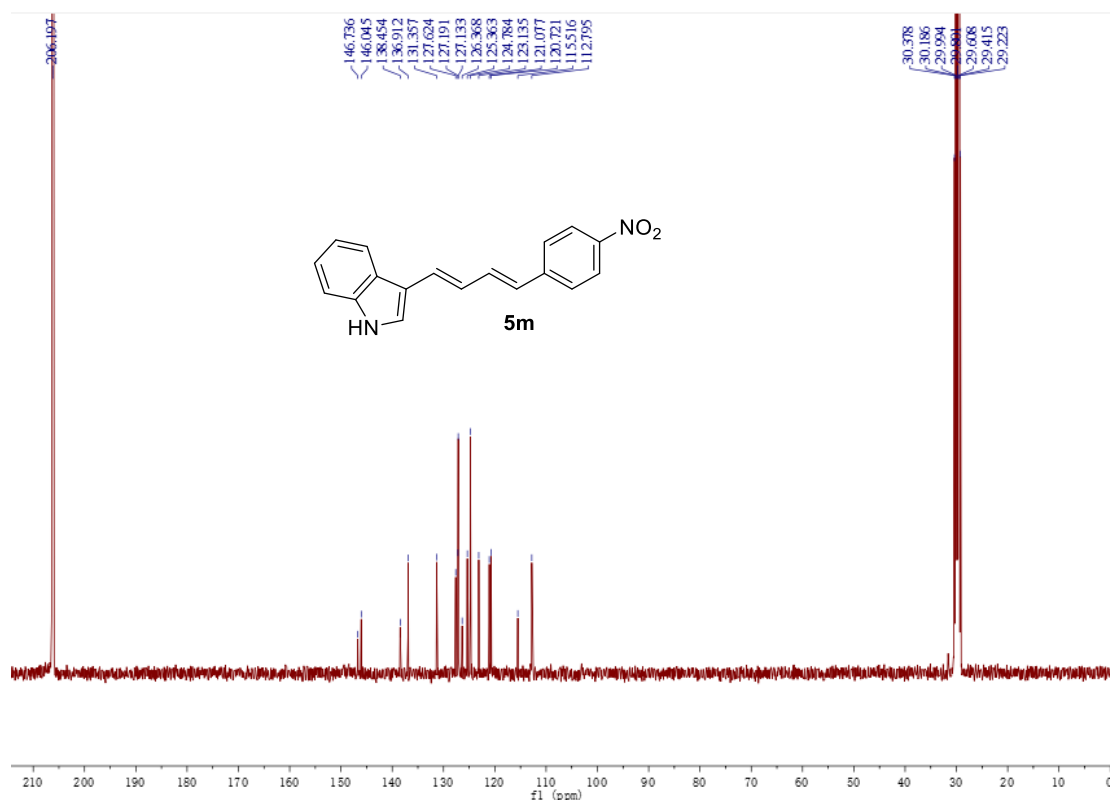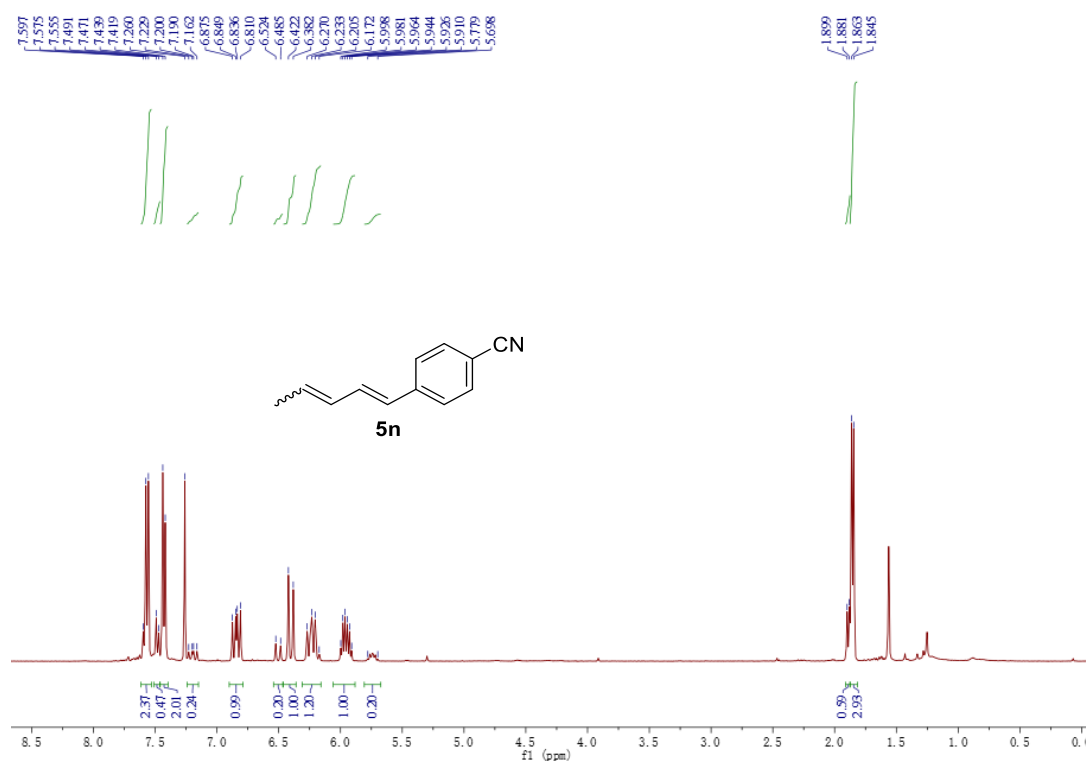

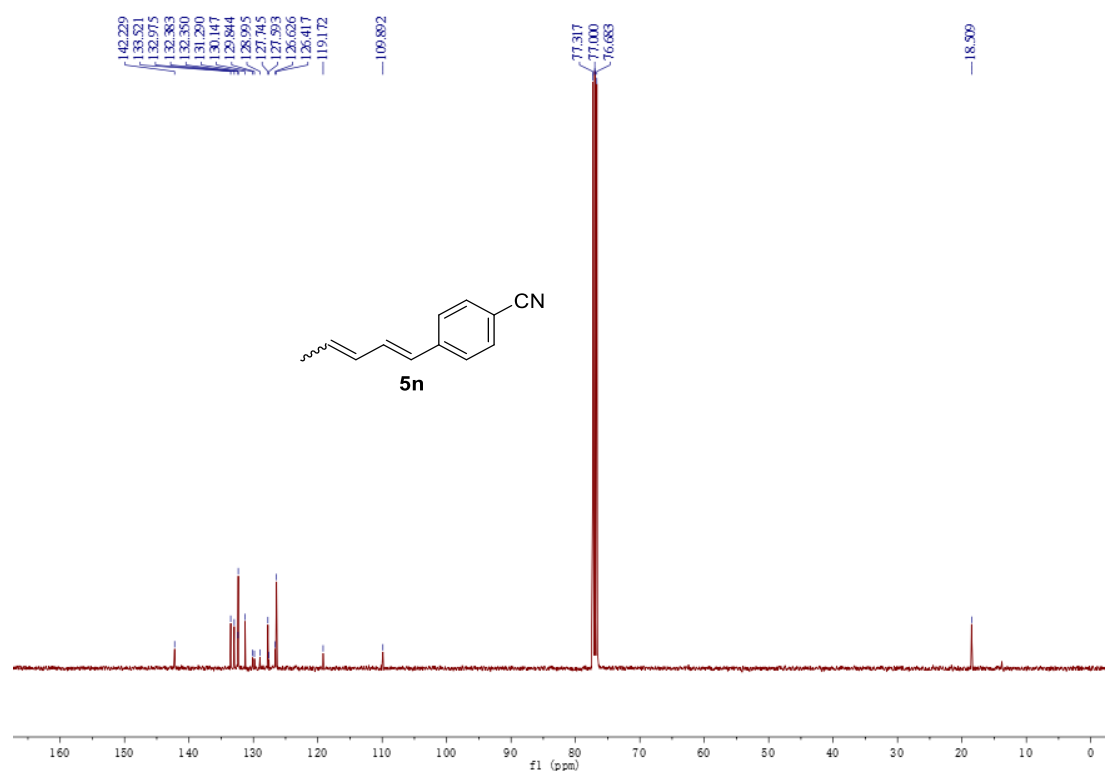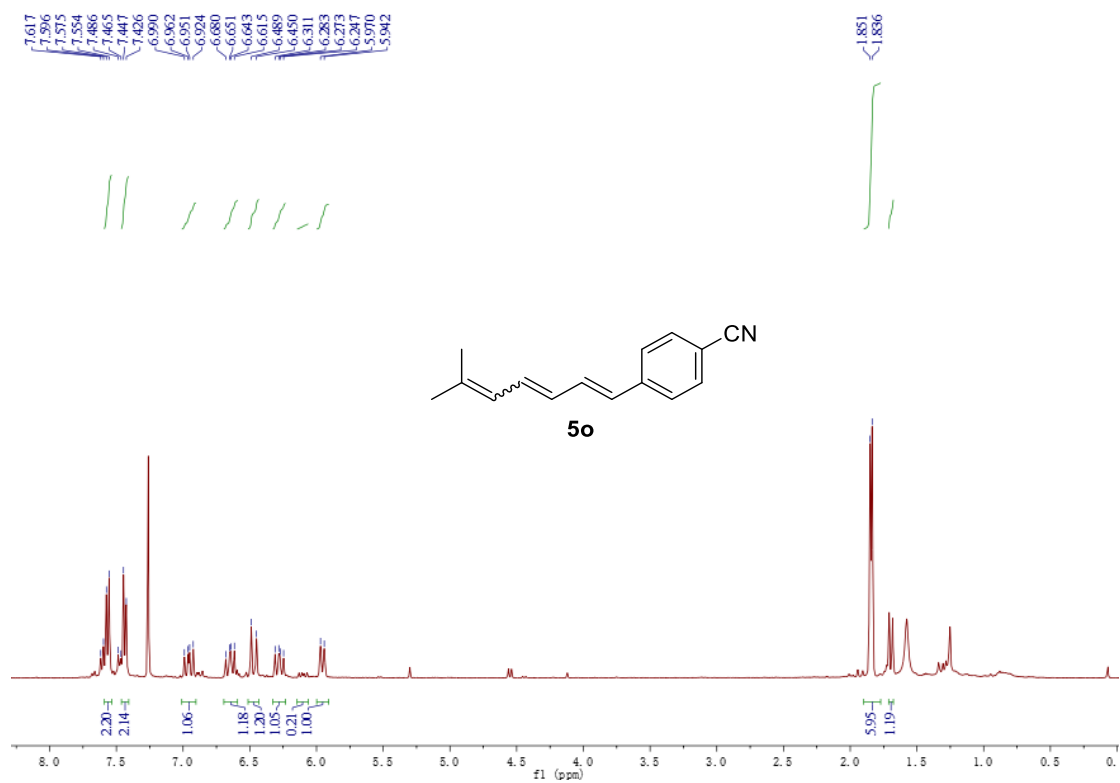

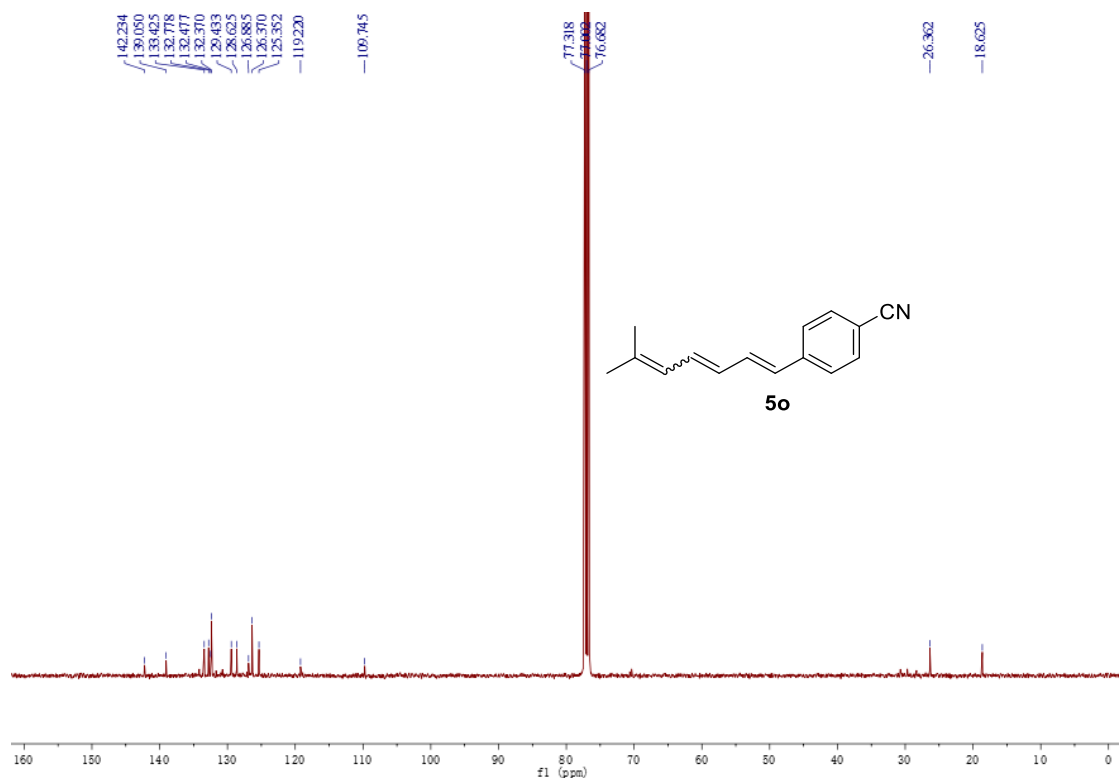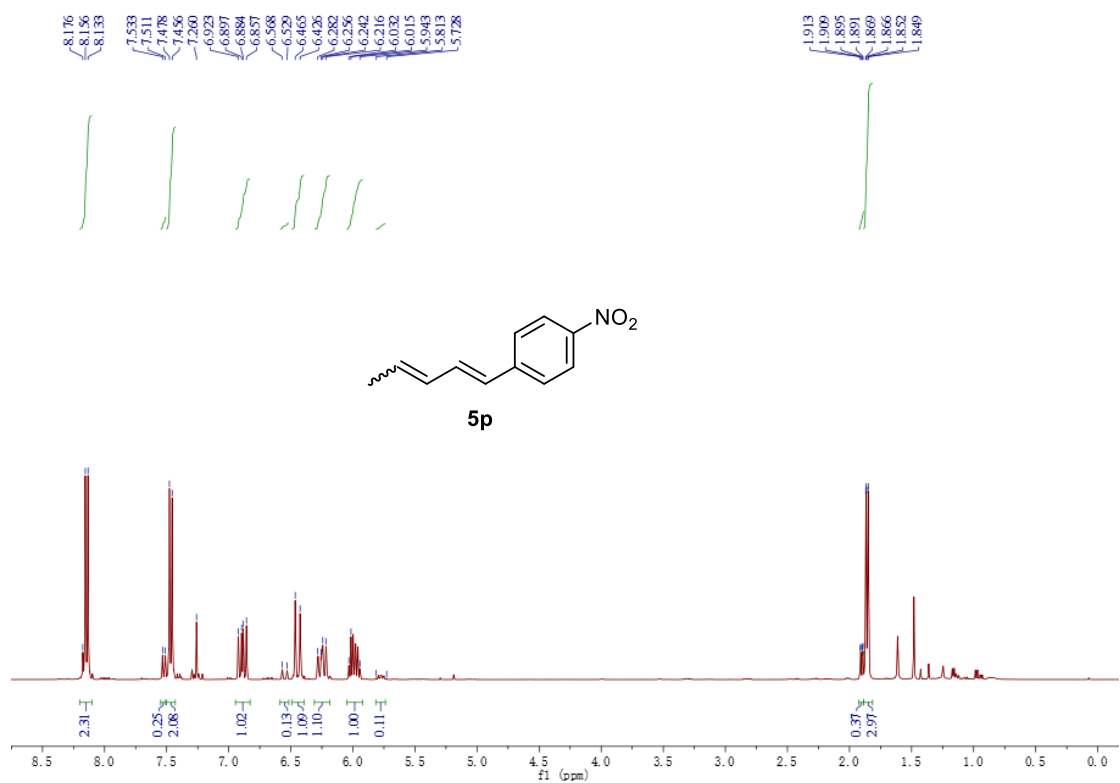

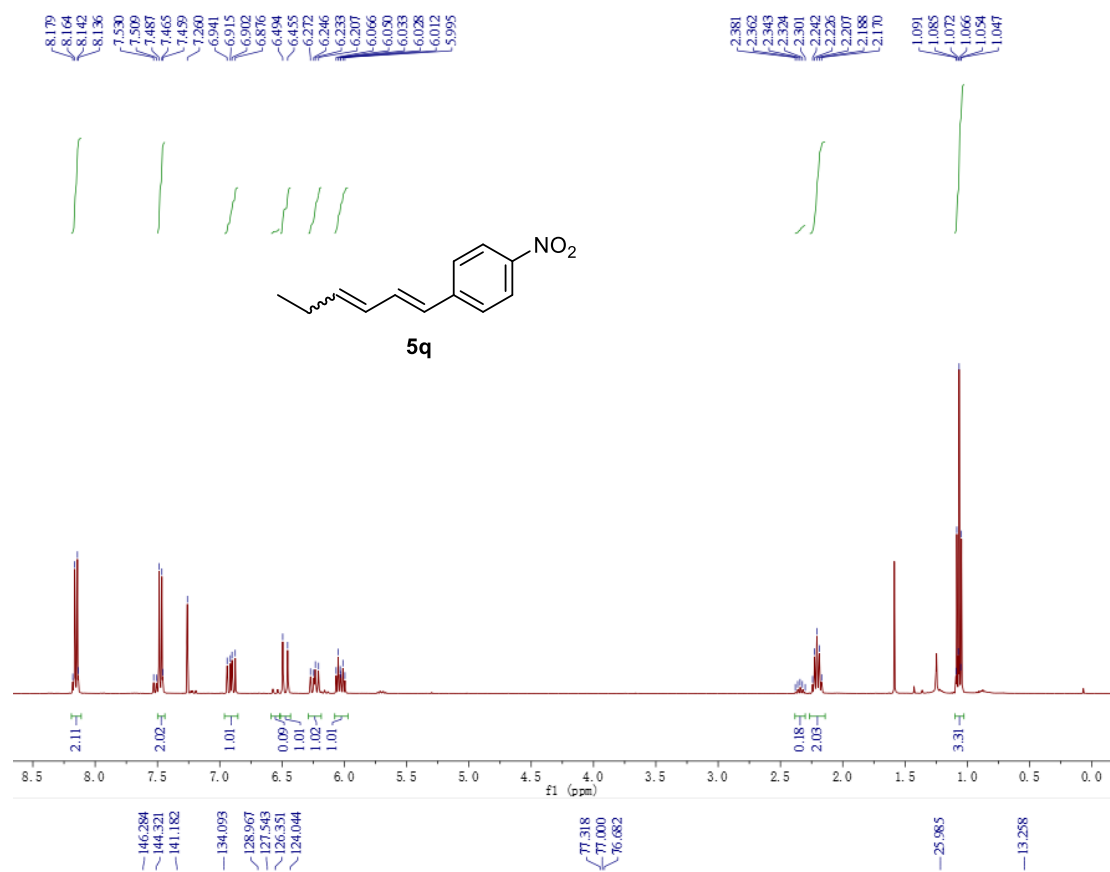

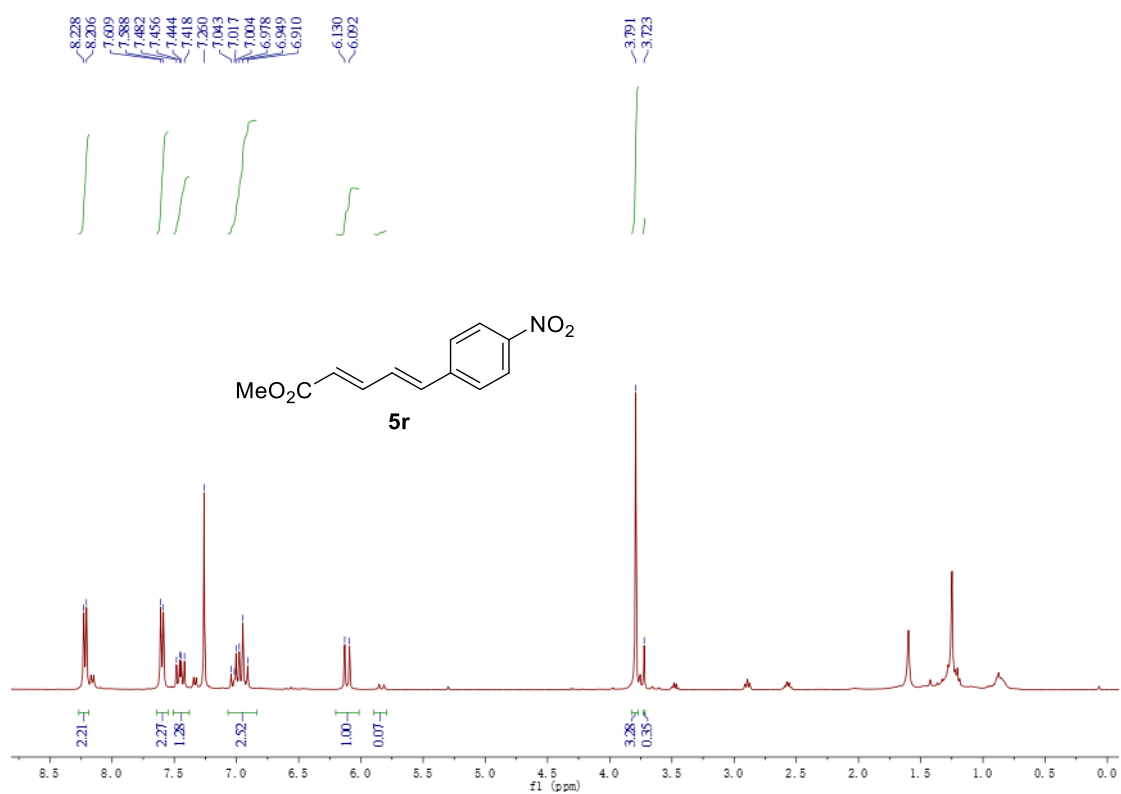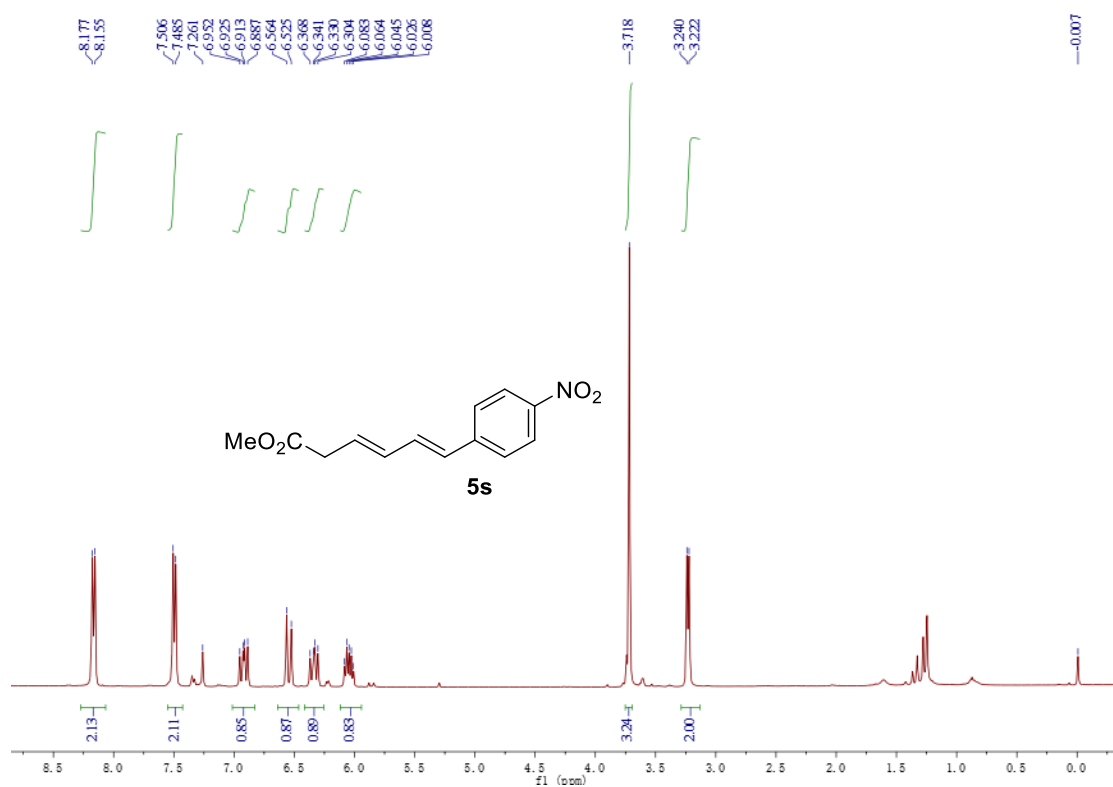

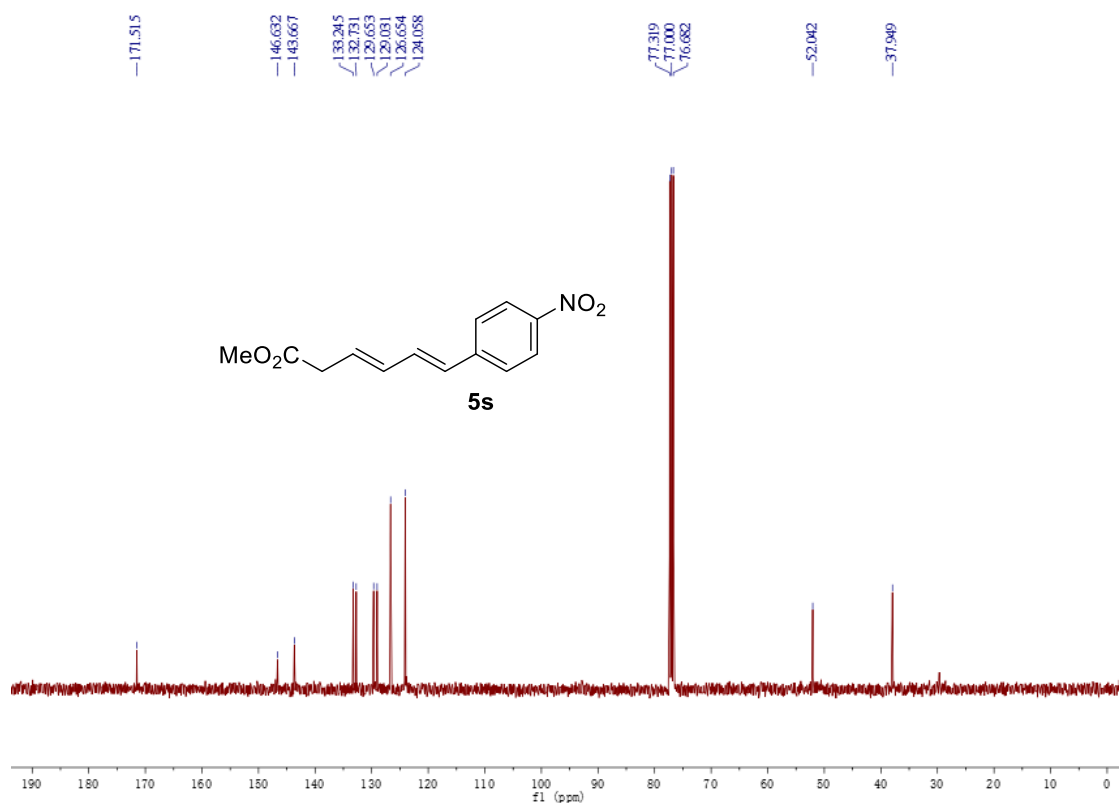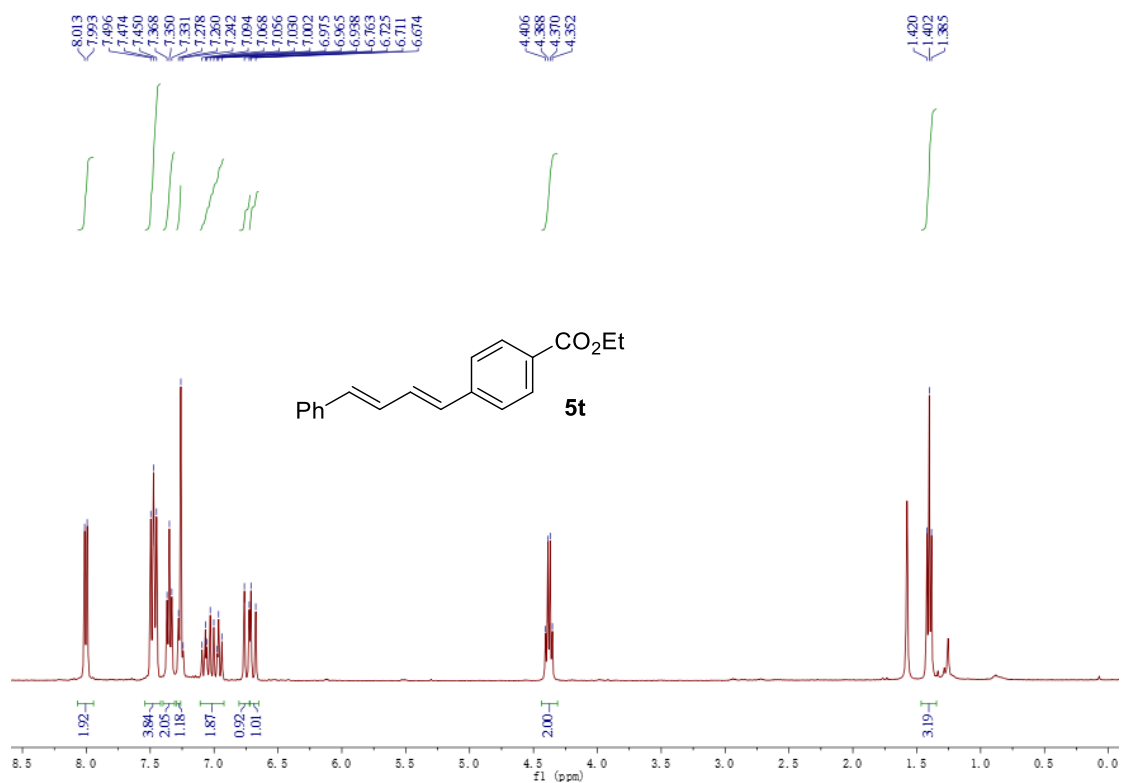



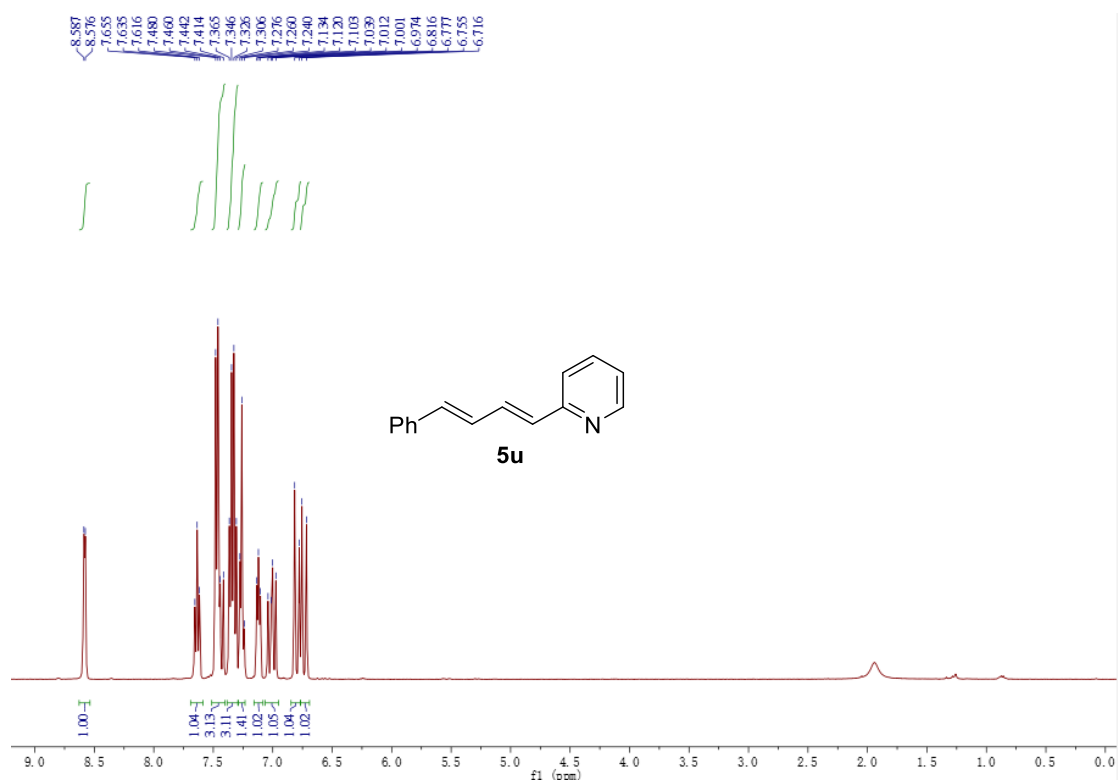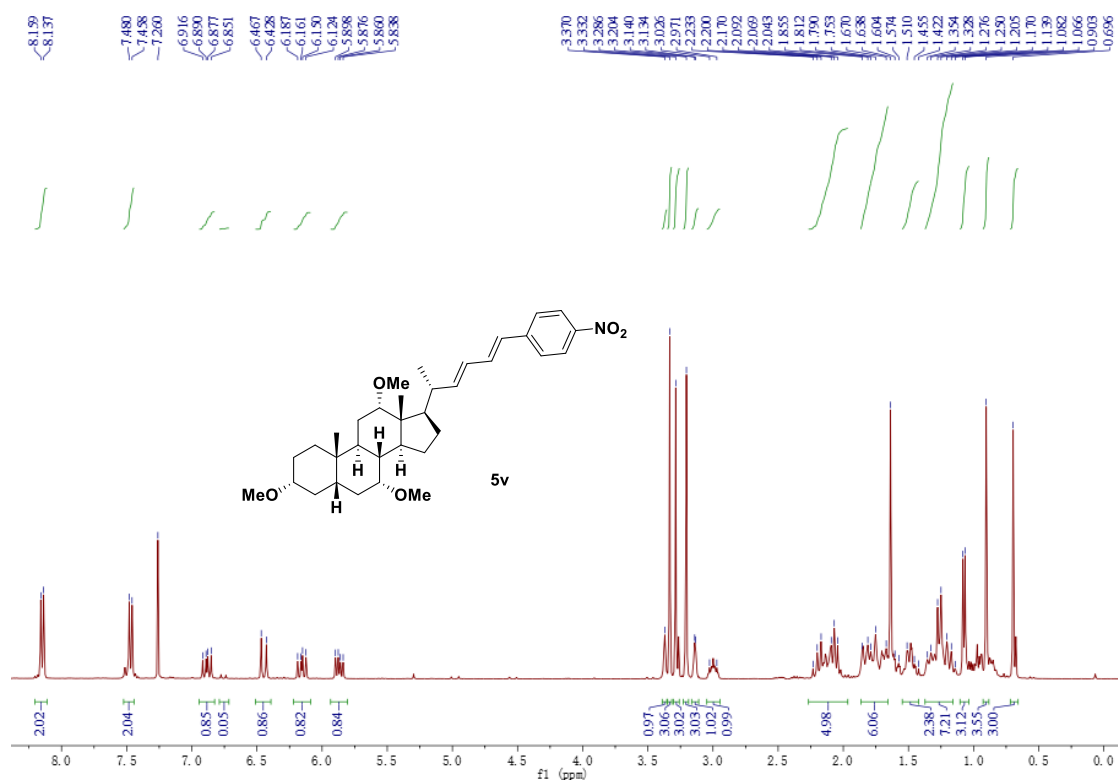

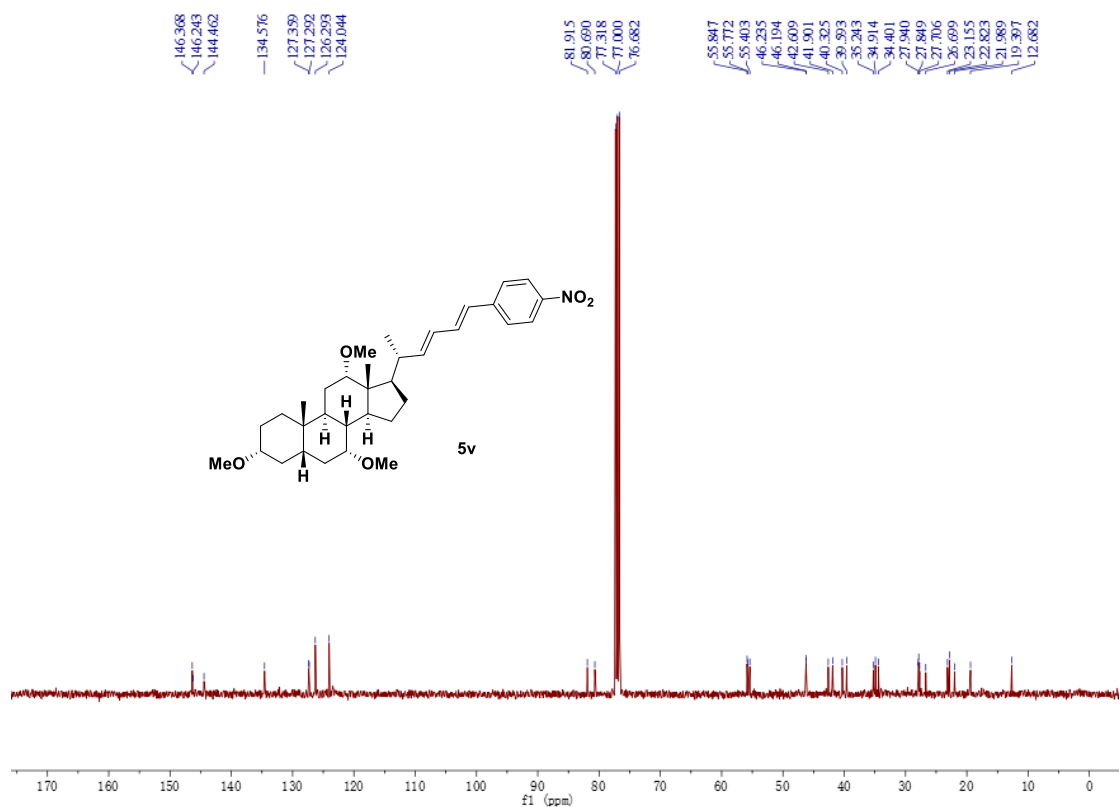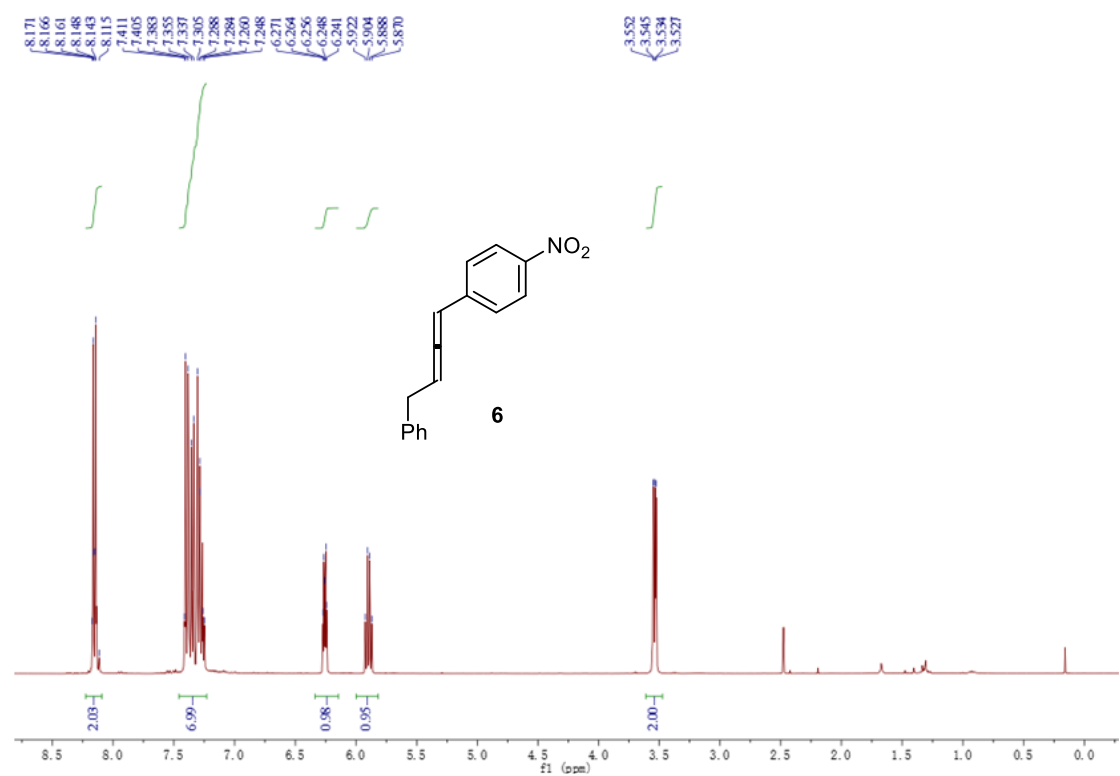

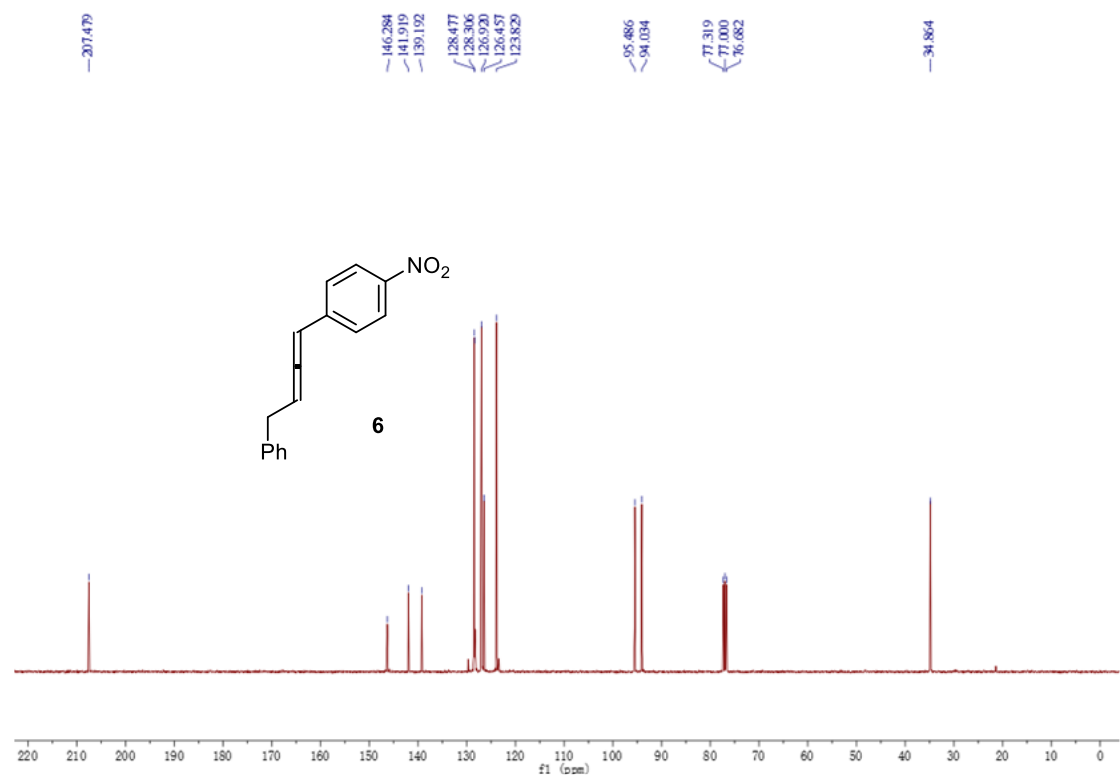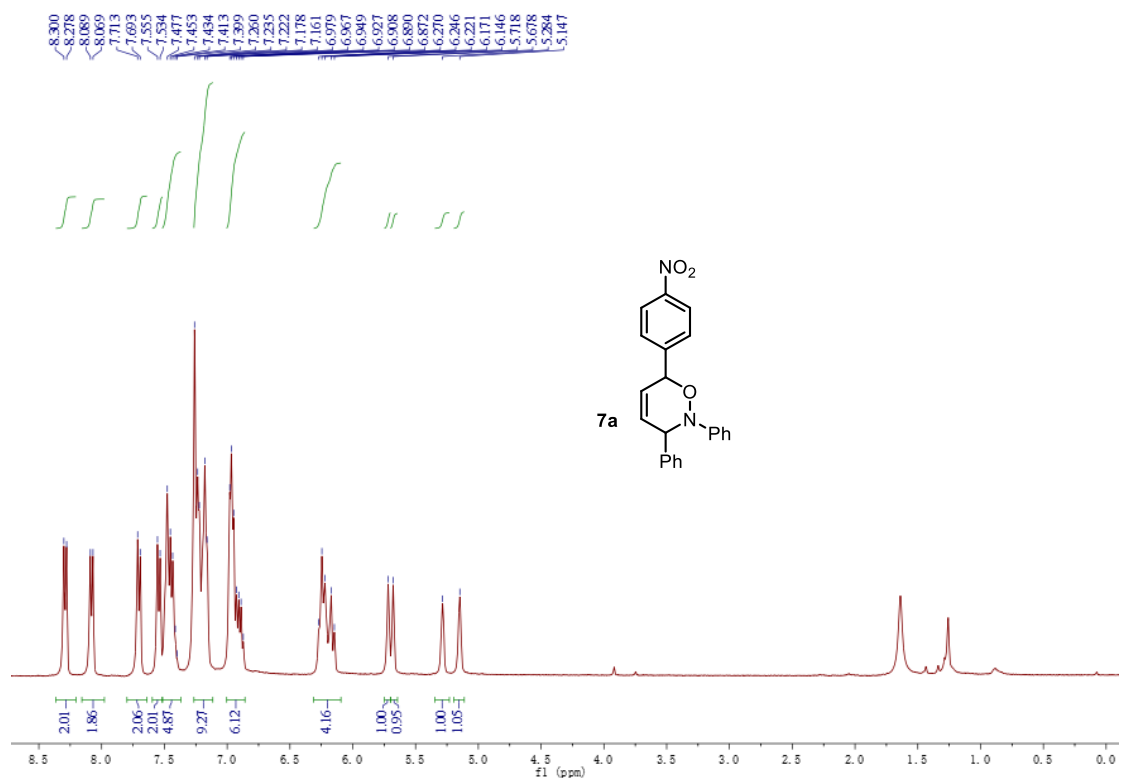

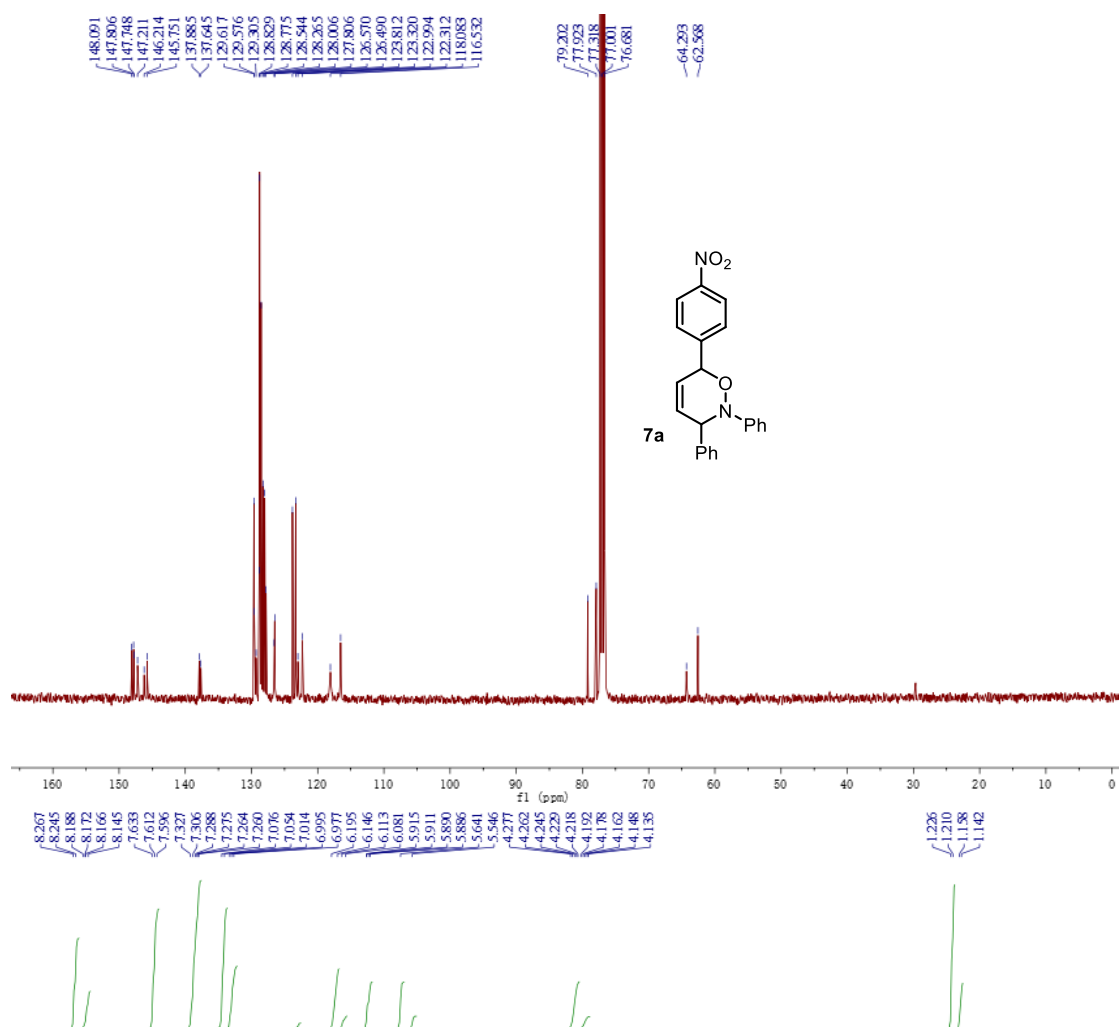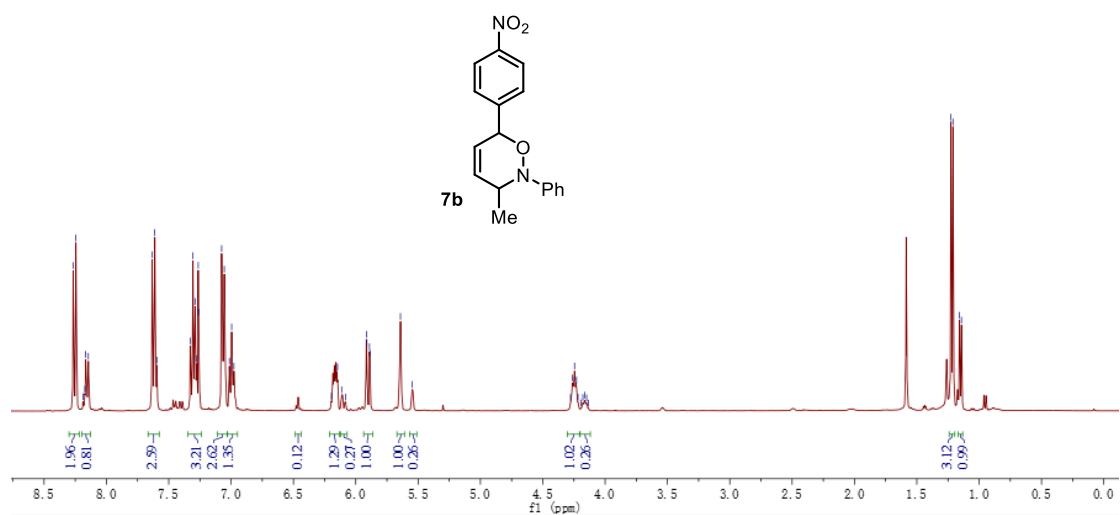

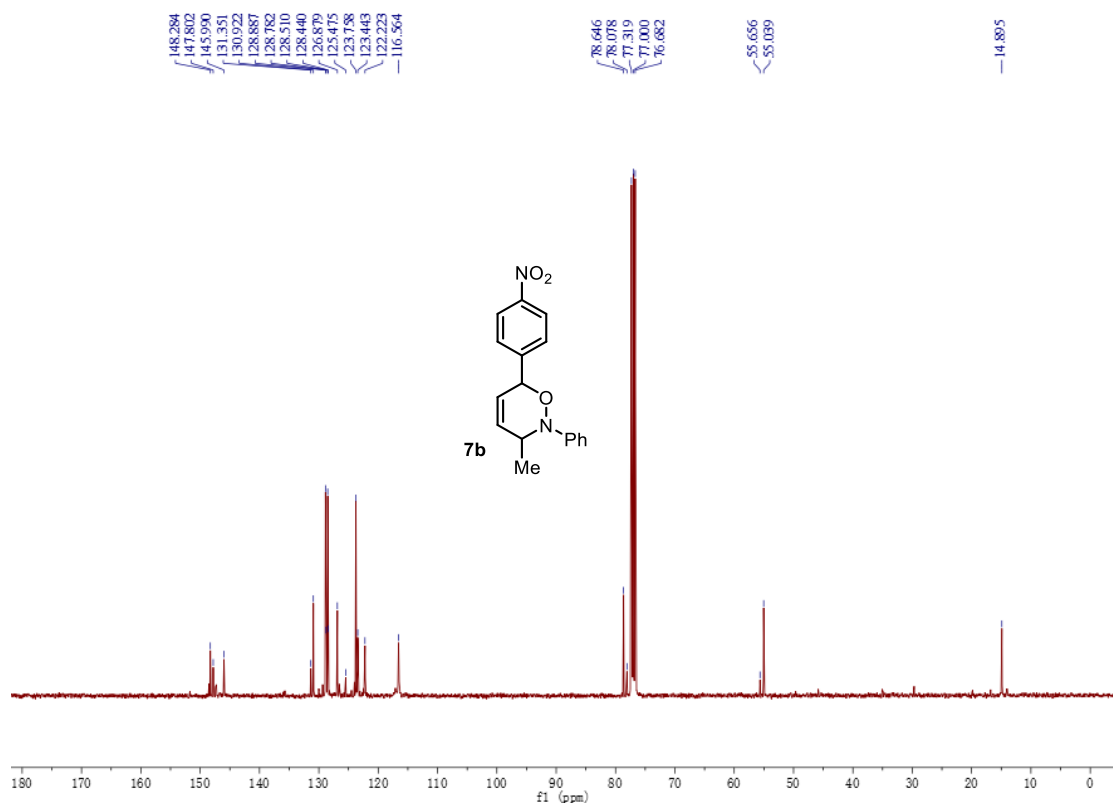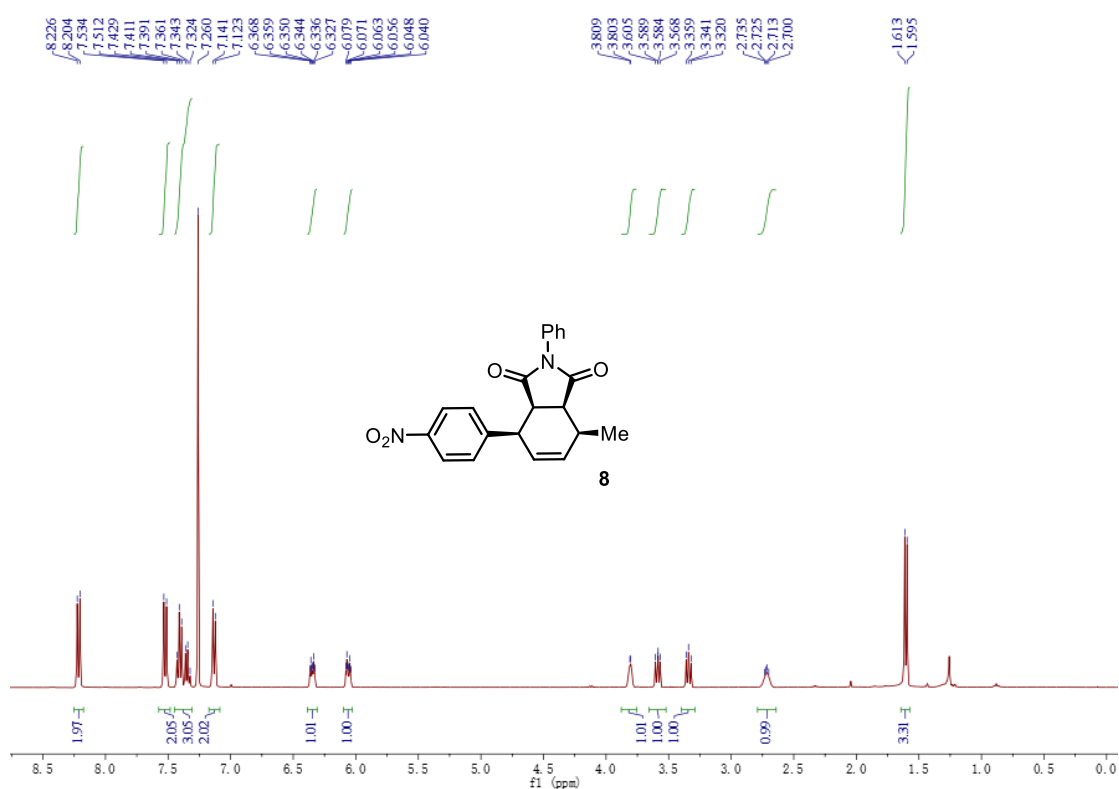

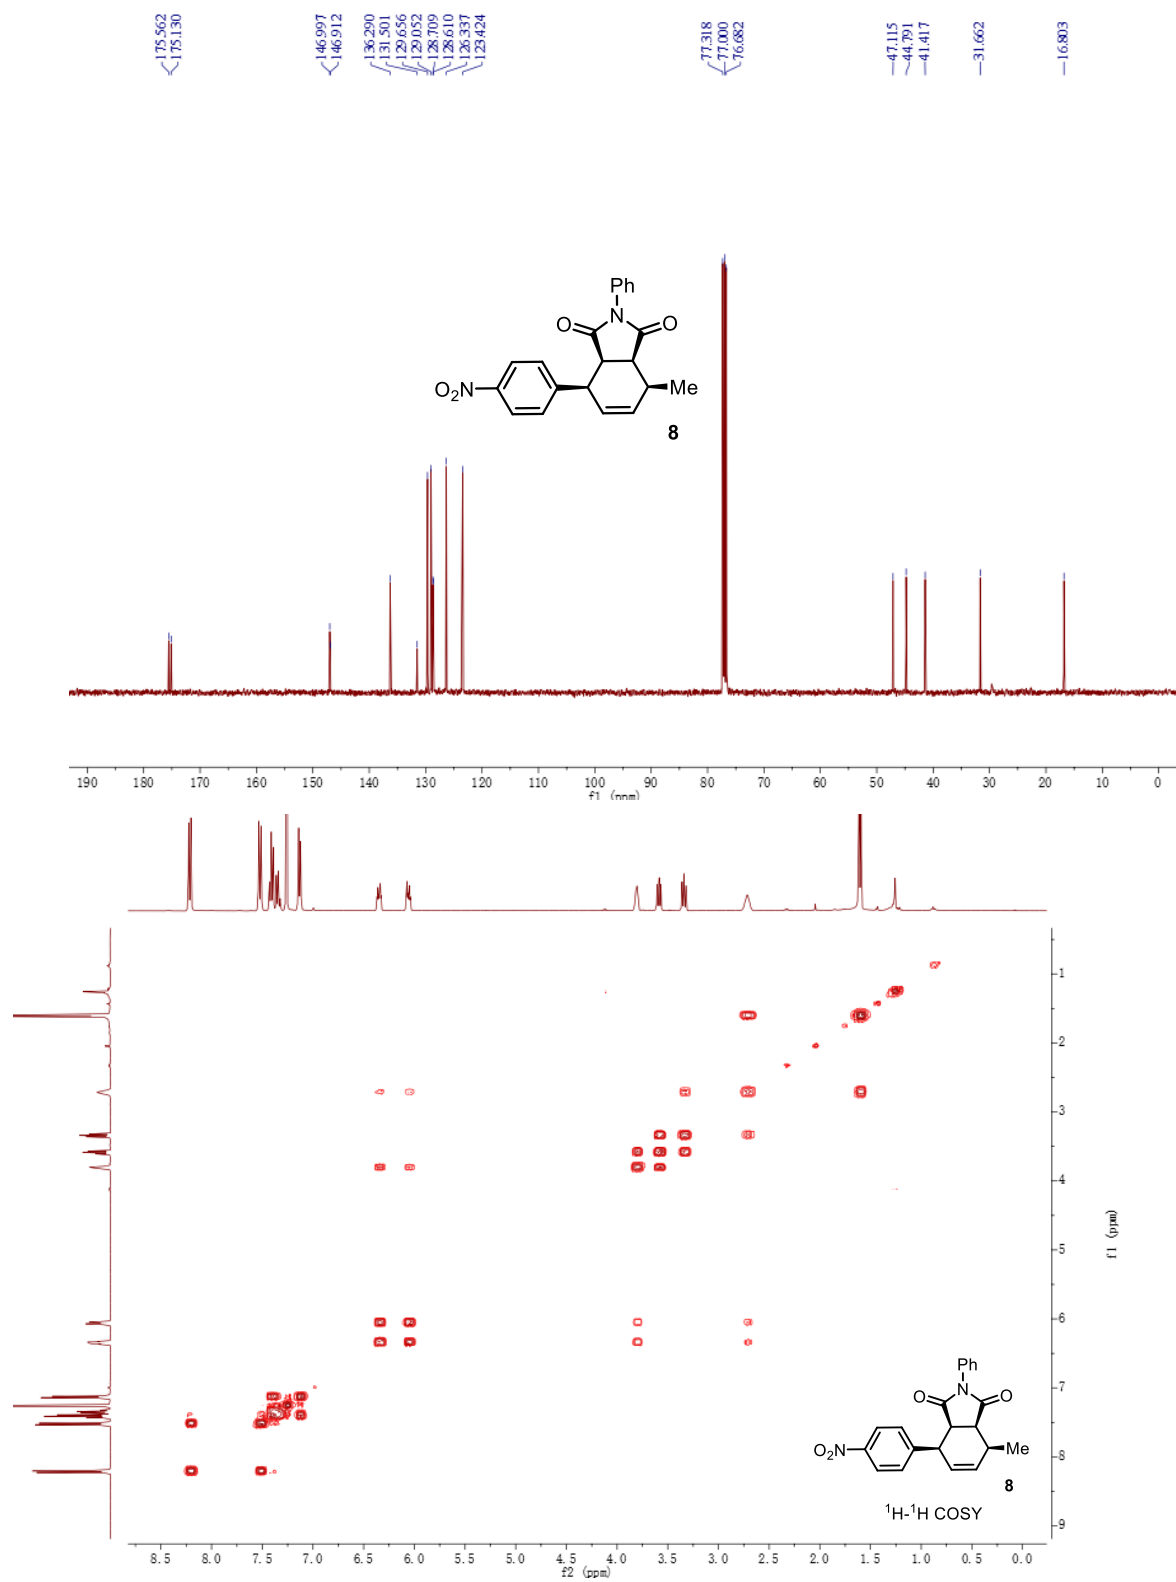

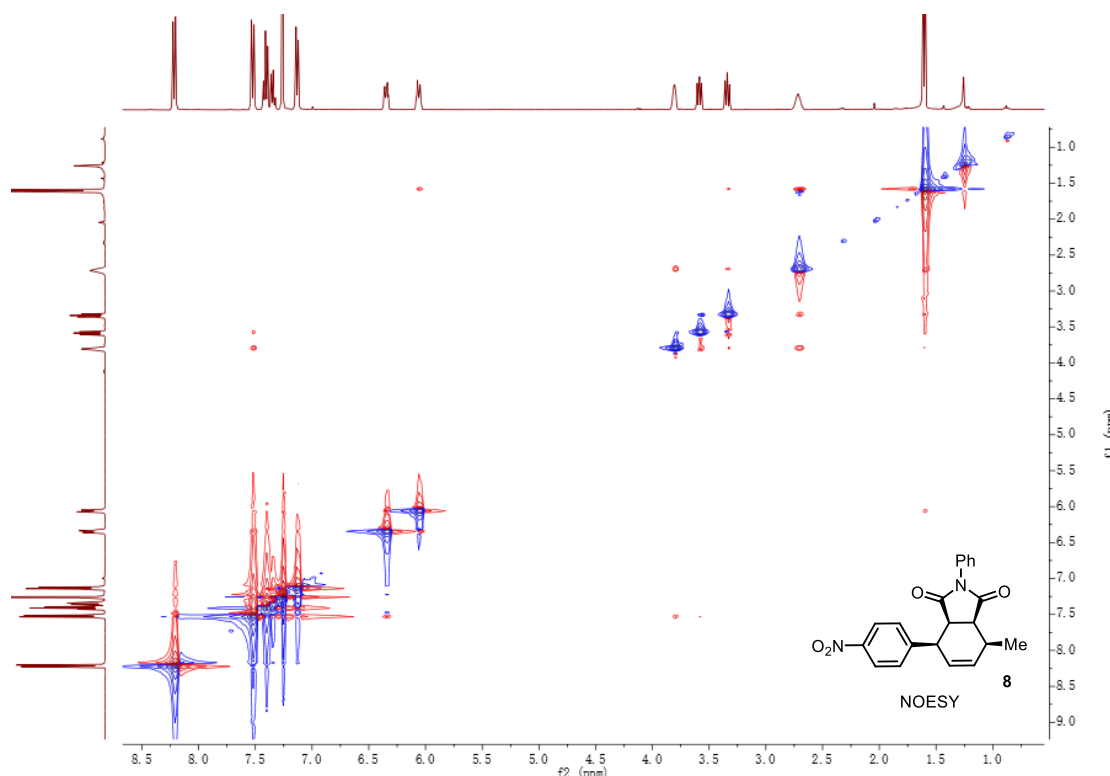

## 8. Synthesis of deuterated alkynes 1a-D<sub>2</sub>

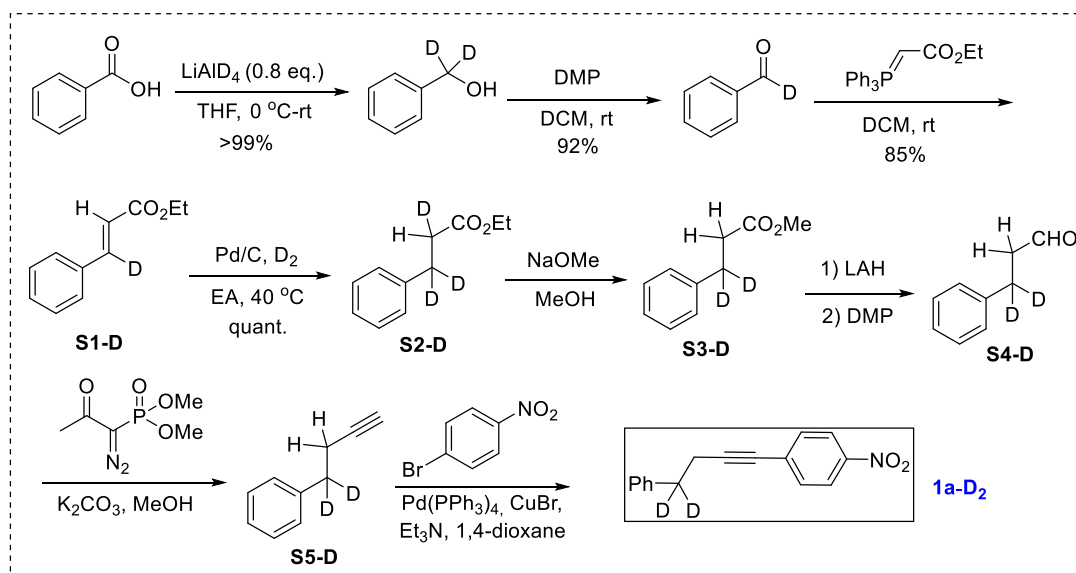

Compounds **S1-D** was known compound and prepared according to the previous literatures (For **S1-D** see: *Chem. Sci.* **2014**, 5, 2416; *Tetrahedron Lett.* **1983**, 24, 743; For **S2-D** see: *Adv. Synth. Catal.* **2018**, 360, 2303; For **S3-D** see: *J. Am. Chem. Soc.* **2017**, 139, 13969).

Compounds **S2-D** (crude product). <sup>1</sup>H NMR (400 MHz, CDCl<sub>3</sub>) δ 7.31-7.27 (m, 2H),

7.22-7.19 (m, 3H), 4.13 (q,  $J = 7.2$  Hz, 2H), 2.63-2.59 (m, 1H), 1.24 (t,  $J = 7.2$  Hz, 3H).

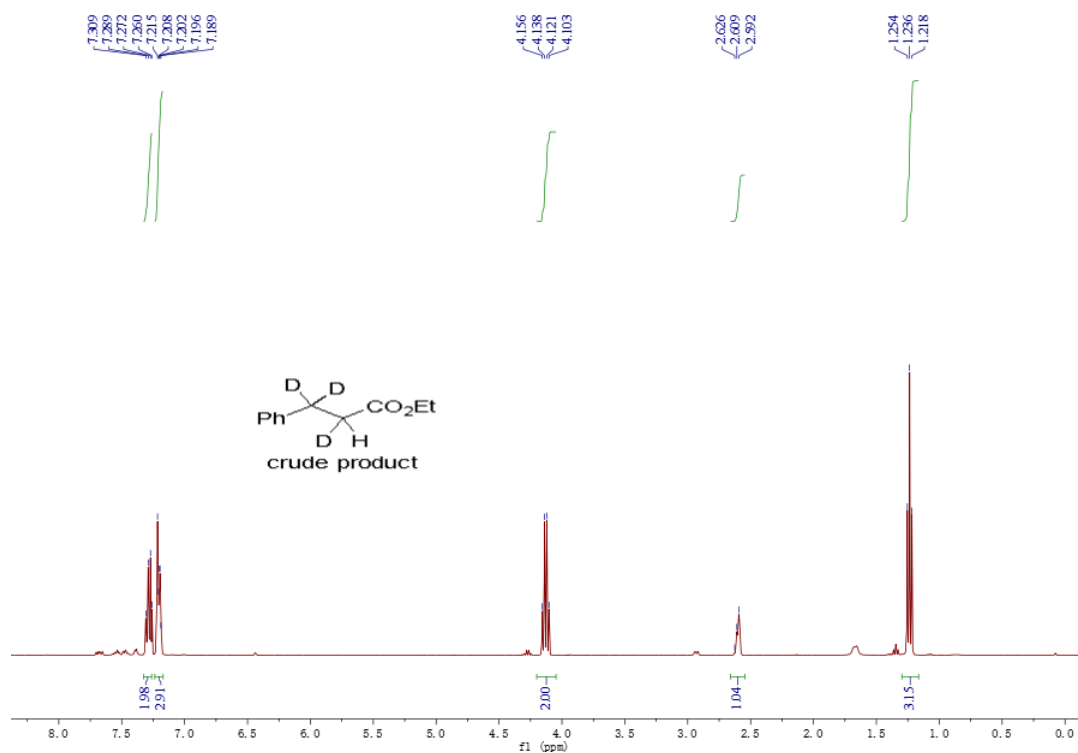

Compounds **S3-D**.  $^1\text{H}$  NMR (400 MHz,  $\text{CDCl}_3$ )  $\delta$  7.31-7.27 (m, 2H), 7.22-7.19 (m, 3H), 3.67 (s, 3H), 2.63 (s, 2H).

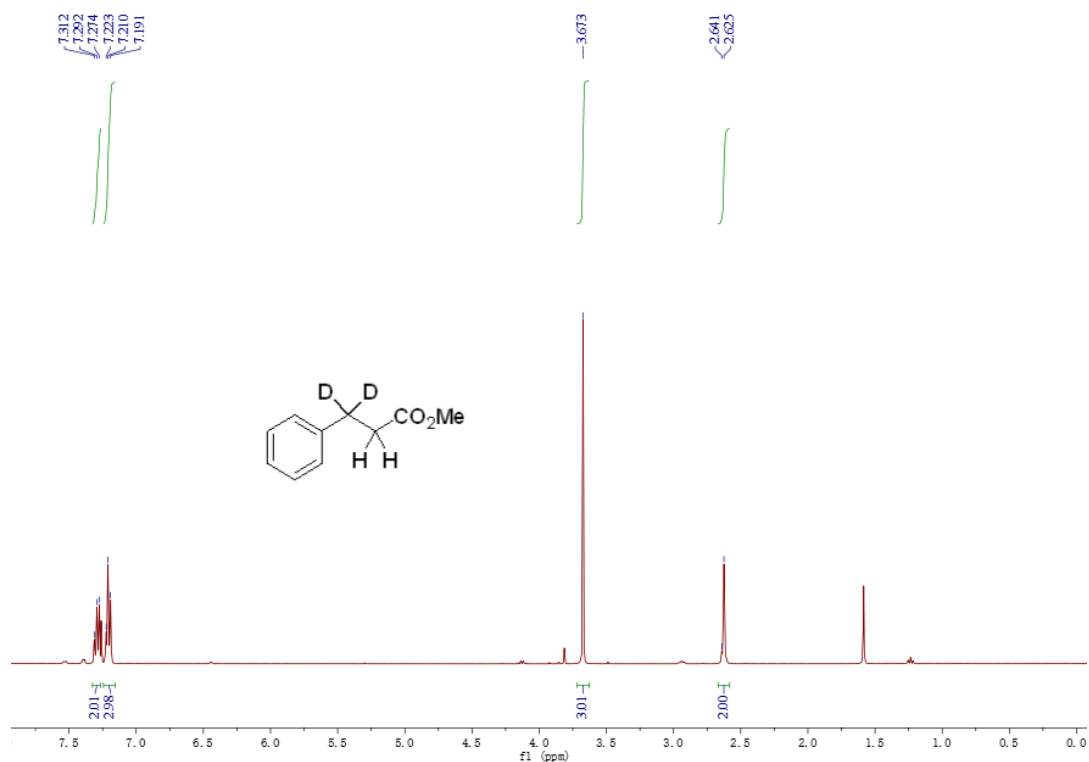

Compounds **S4-D**.  $^1\text{H}$  NMR (400 MHz,  $\text{CDCl}_3$ )  $\delta$  9.83 (s, 1H), 7.32-7.28 (m, 2H), 7.23-



7.19 (m, 3H), 2.77 (s, 2H).

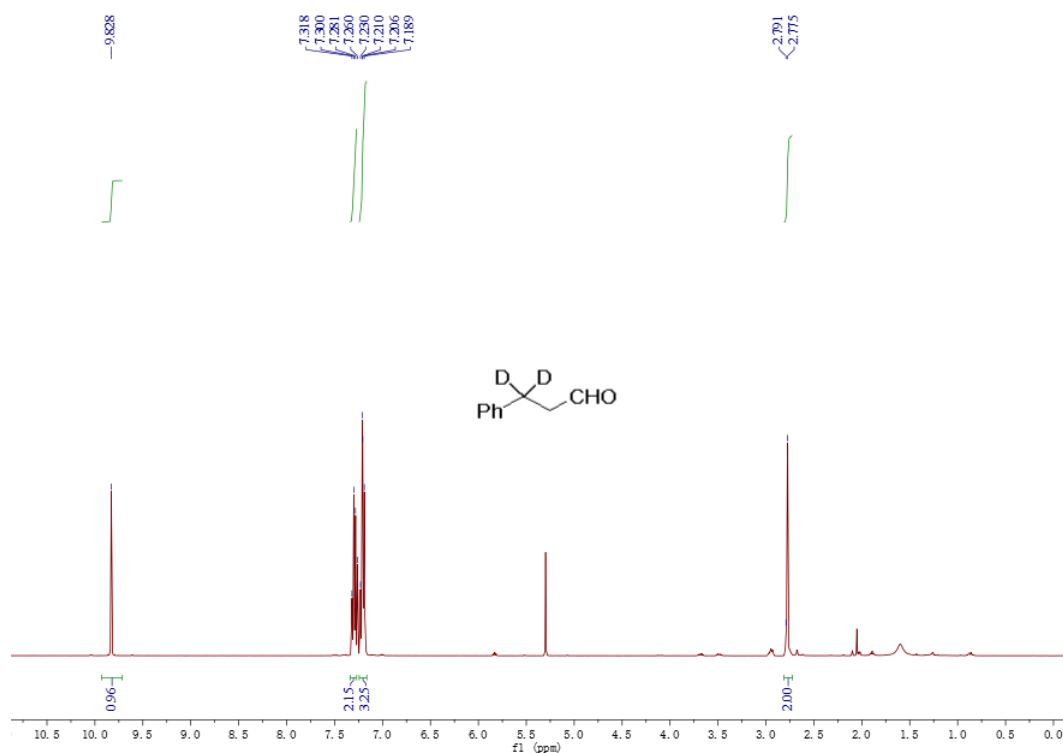

Compounds **S5-D**. <sup>1</sup>H NMR (400 MHz, CDCl<sub>3</sub>) δ 7.33-7.29 (m, 2H), 7.24-7.21 (m, 3H), 2.48 (s, 2H), 1.98 (t, *J* = 2.6 Hz, 1H).

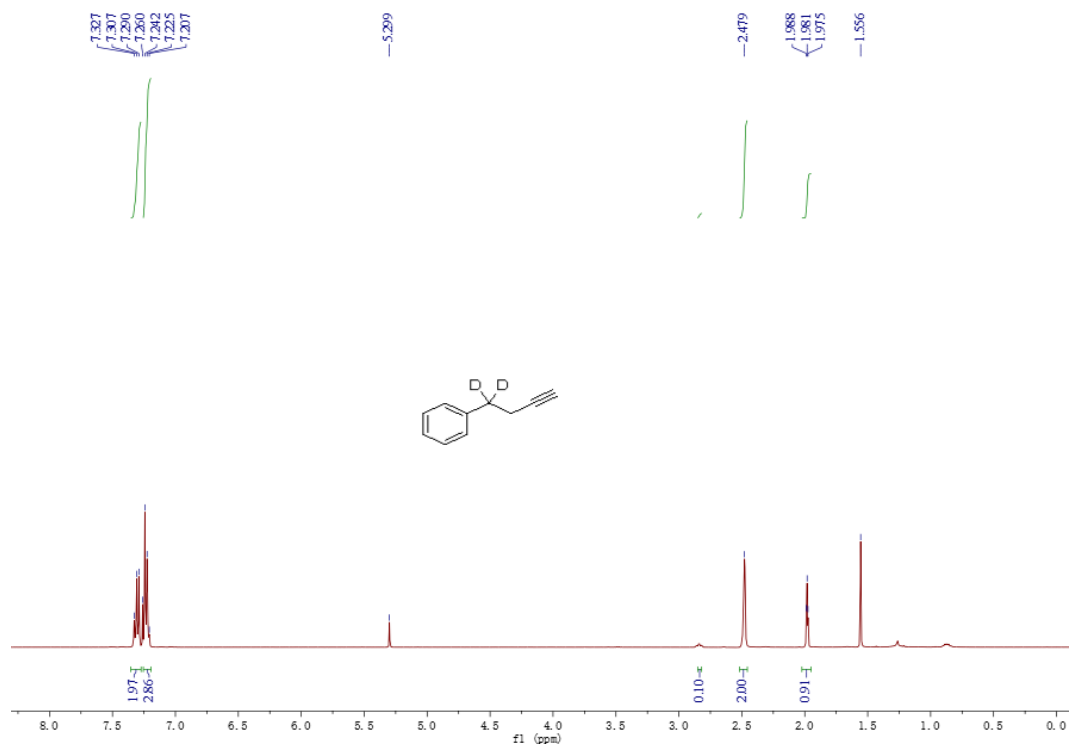

Compound **1a-D<sub>2</sub>**. <sup>1</sup>H NMR (400 MHz, CDCl<sub>3</sub>) δ 8.15 (d, *J* = 8.8 Hz, 2H), 7.48 (d, *J* = 8.8 Hz, 2H), 7.36-7.32 (m, 2H), 7.27-7.24 (m, 3H), 2.93 (t, *J* = 7.2 Hz, 0.16 H, 92% D),

2.75-2.74 (m, 2H).

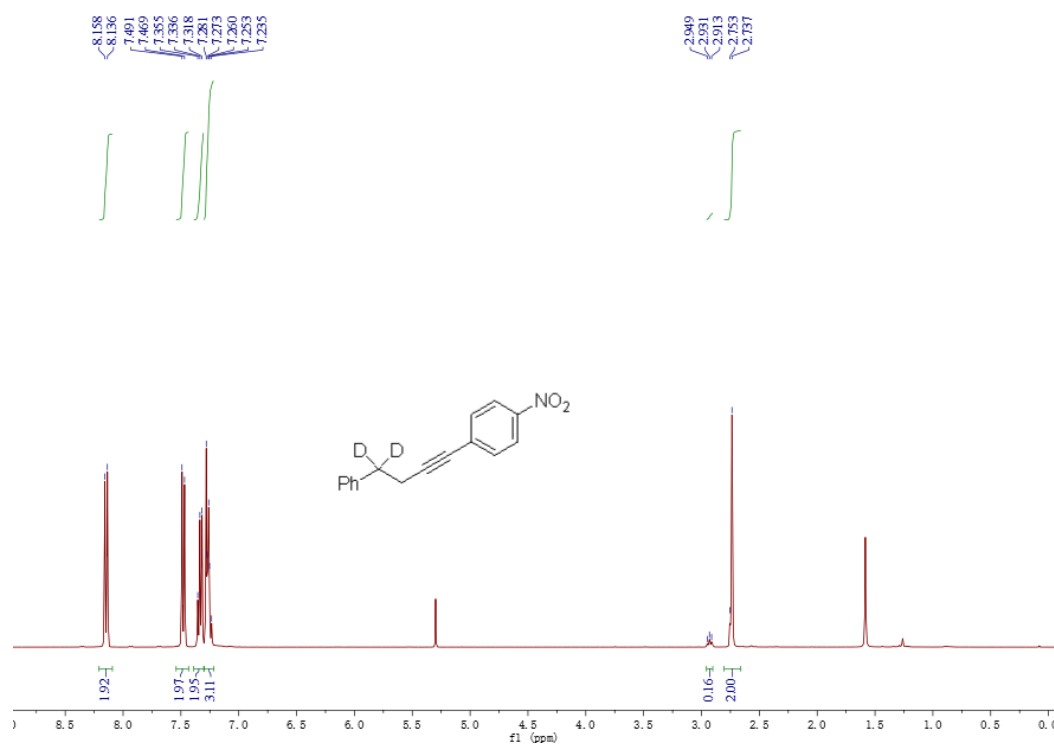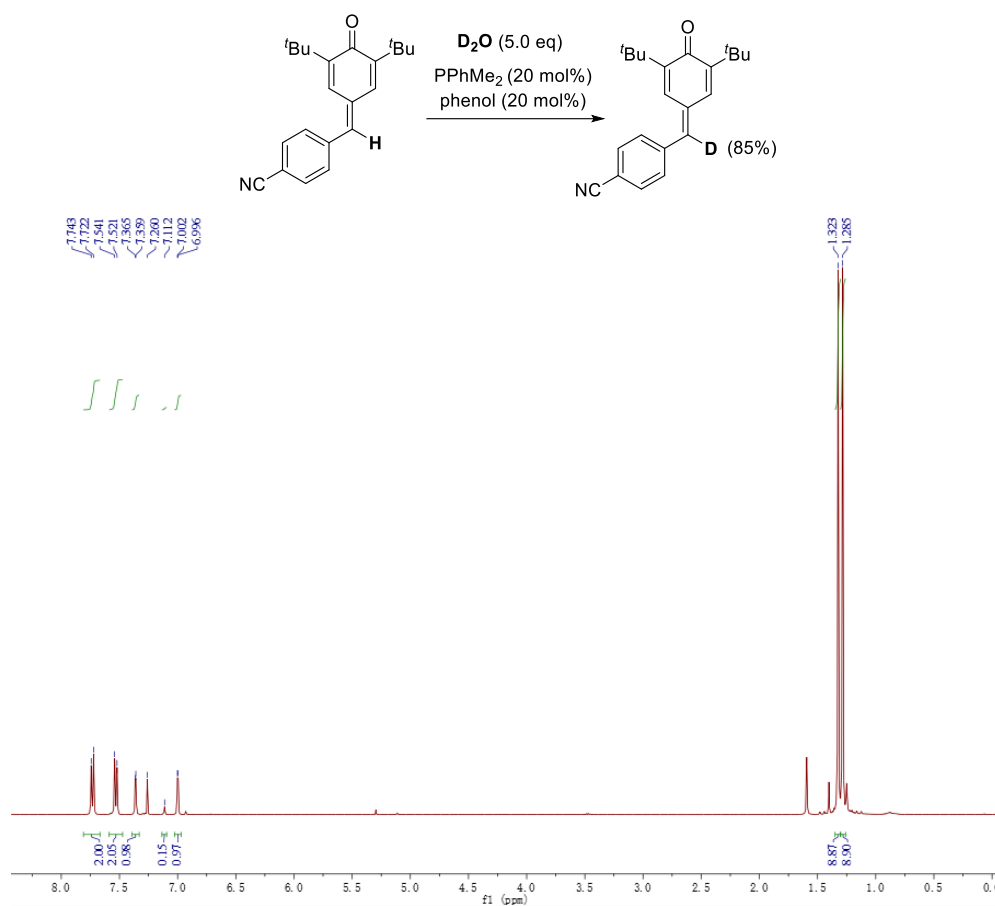

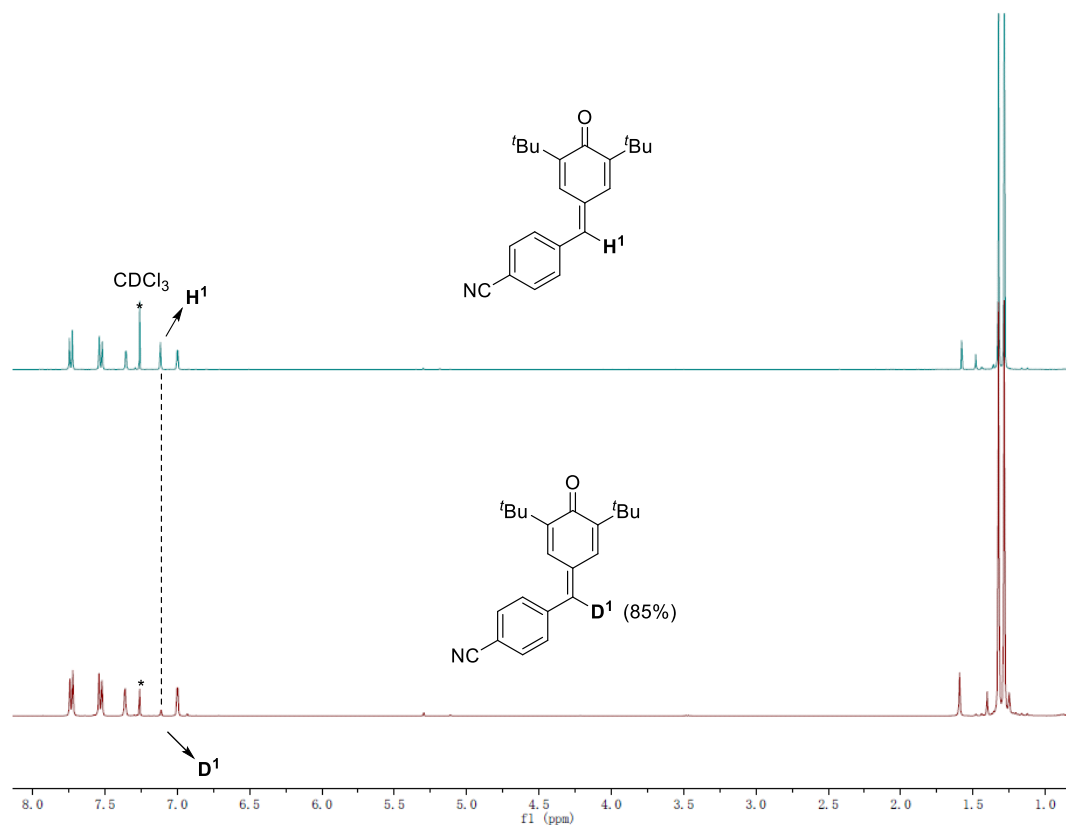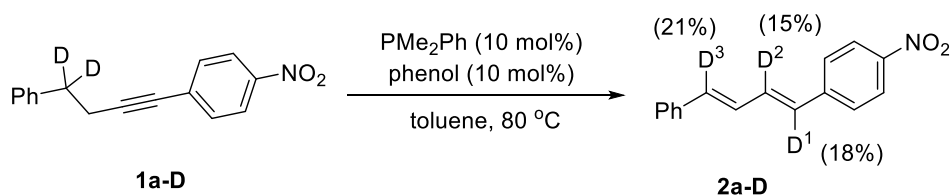

Deuterium compound **1a-D** (0.1 mmol), phenol (0.01 mmol) and anhydrous toluene (1.0 mL) were added to a dried vial under N<sub>2</sub> protection, then PMe<sub>2</sub>Ph (0.01 mmol) was added to the above mixture at room temperature (operated in glove box). The resulting mixture was stirred at 80 °C for 12 hours. The reaction mixture was then concentrated on a rotary evaporator under reduce pressure and the residue was subjected to purification by column chromatography (PE/EA = 20/1) to afford the corresponding product **2a-D** in 82% yield.

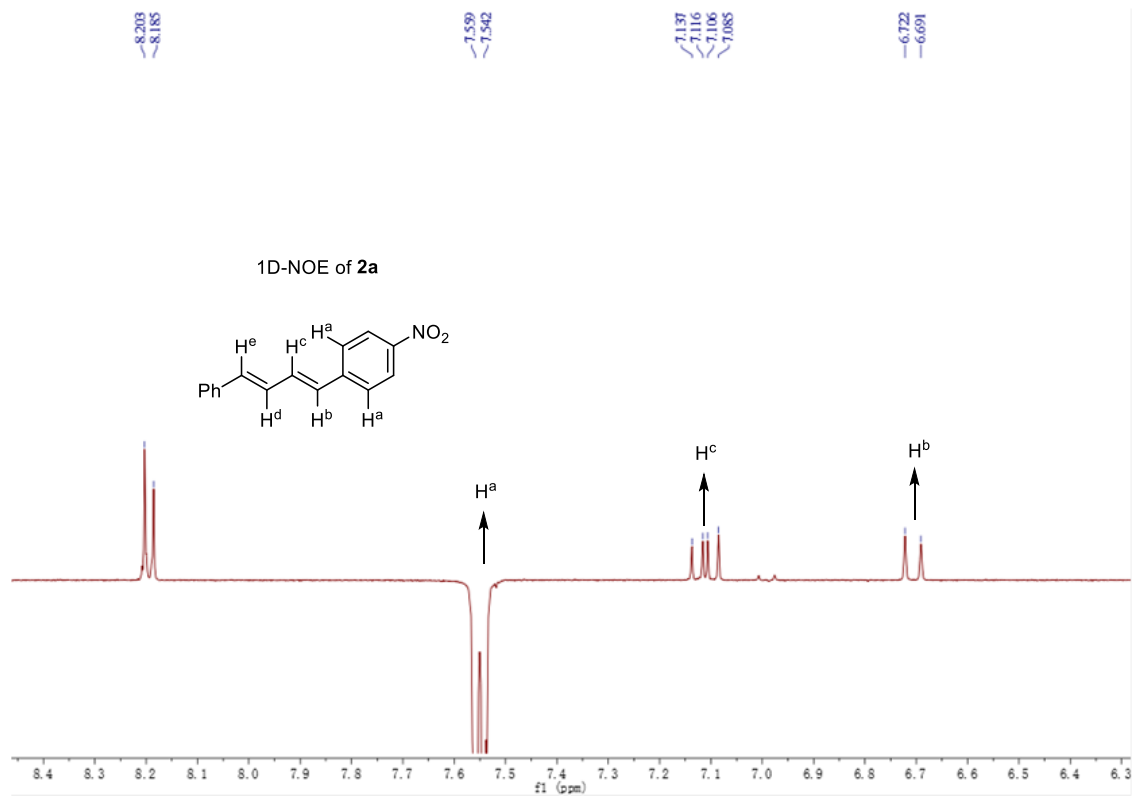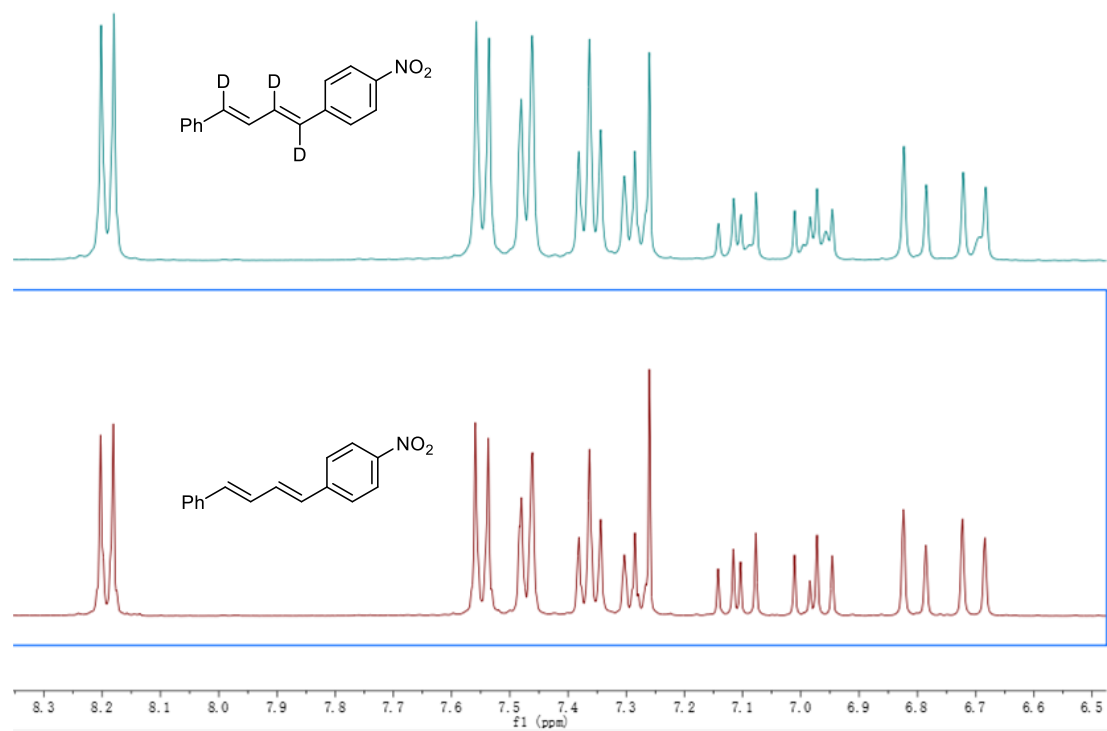

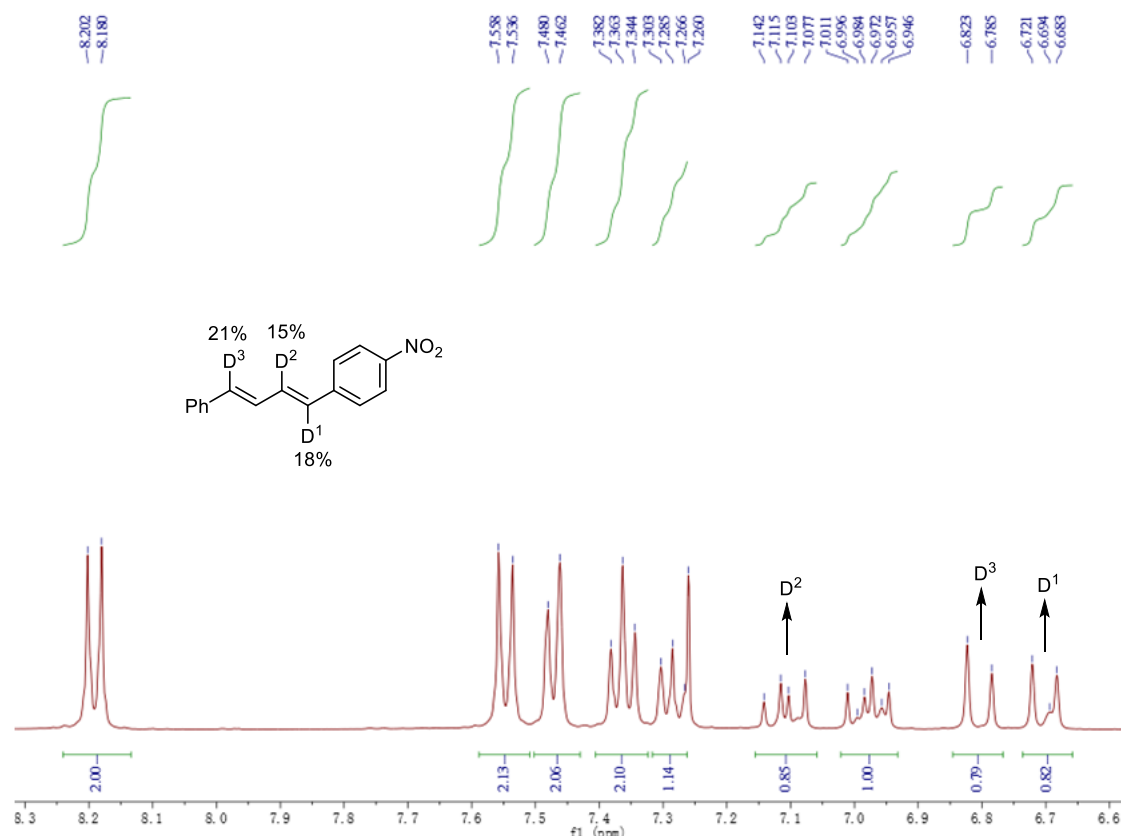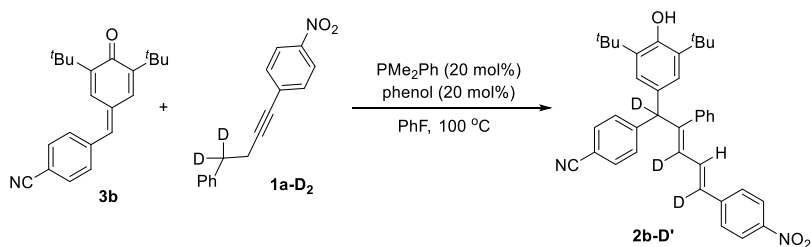

Compound *p*-quinone methide **3b** (0.15 mmol), alkyne **1a-D<sub>1</sub>** (0.1 mmol), phenol (0.02 mmol) and anhydrous fluorobenzene (4.0 mL) were added to a dried vial under N<sub>2</sub> protection, then  $\text{PMe}_2\text{Ph}$  (0.02 mmol) was added to the above mixture at room temperature (operated in glove box). The resulting mixture was stirred at 100 °C for 12 hours. The reaction mixture was then concentrated on a rotary evaporator under reduce pressure and the residue was subjected to purification by column chromatography (PE/EA = 20/1) to afford the corresponding product **2b-D'** in 76% yield.

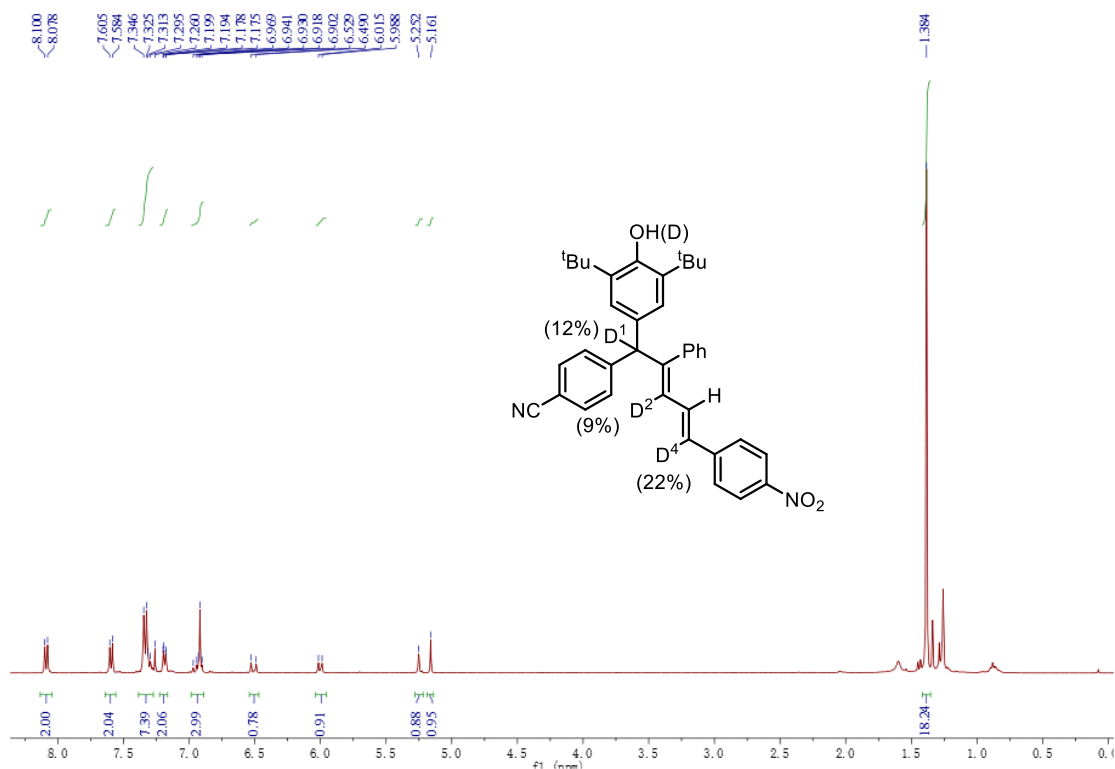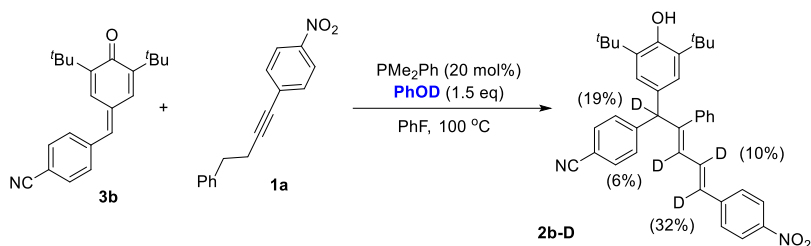

Compound *p*-quinone methide **3b** (0.15 mmol), alkyne **1a** (0.1 mmol), **PhOD** (0.15 mmol) and anhydrous fluorobenzene (4.0 mL) were added to a dried vial under N<sub>2</sub> protection, then  $\text{PMe}_2\text{Ph}$  (0.02 mmol) was added to the above mixture at room temperature (operated in glove box). The resulting mixture was stirred at  $100^\circ\text{C}$  for 12 hours. The reaction mixture was then concentrated on a rotary evaporator under reduce pressure and the residue was subjected to purification by column chromatography (PE/EA = 20/1) to afford the corresponding product **2b-D** in 68% yield.

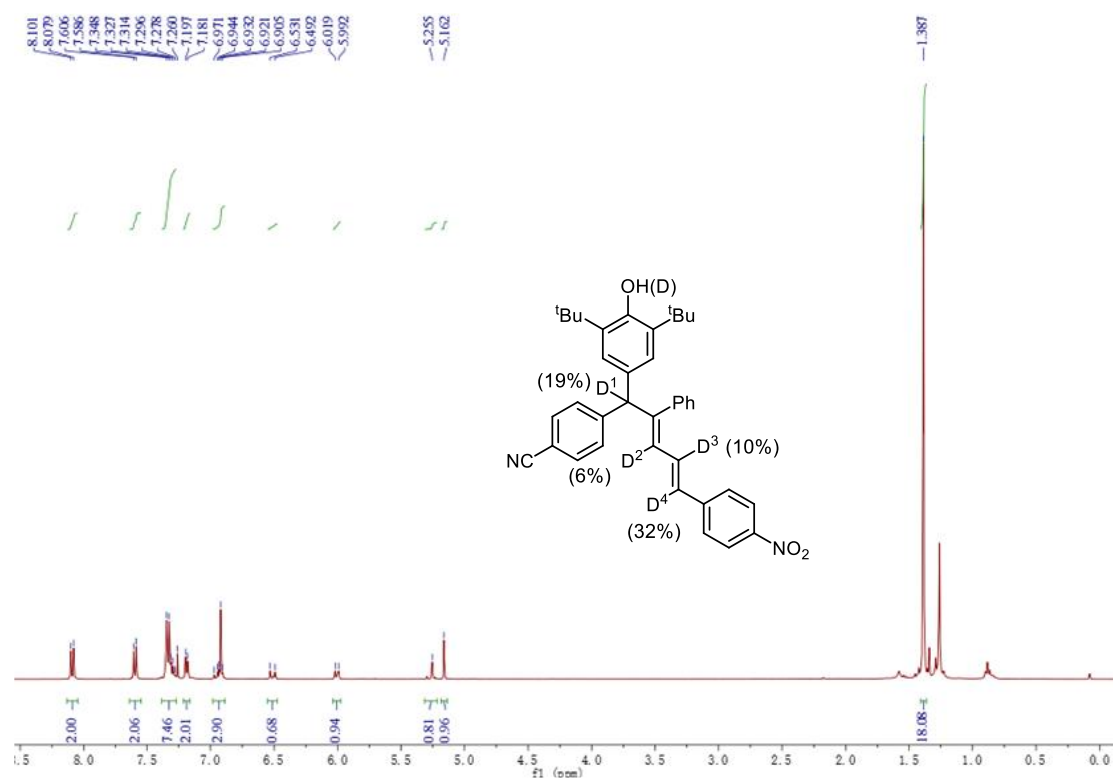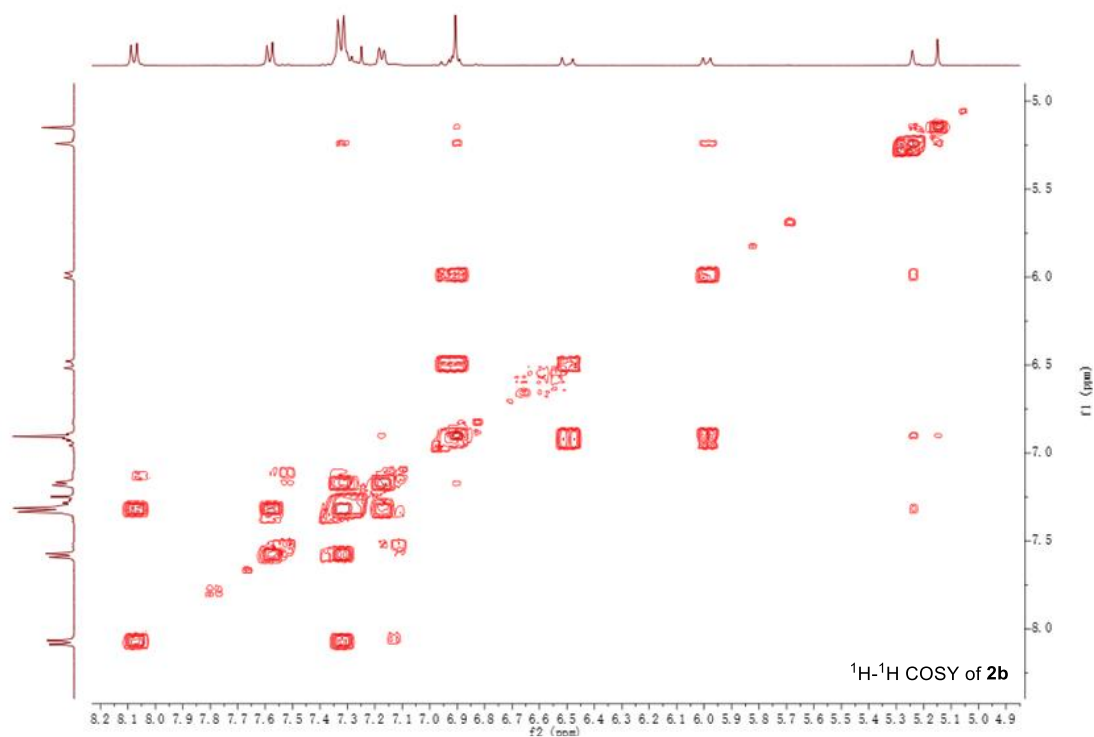

Supplement: d0qo01399d1.pdf [file d0qo01399d1.pdf]
